# Supplementary material for: Transcriptome Profiling of Testis during Sexual Maturation Stages in Eriocheir sinensis Using Illumina Sequencing
Source: PLoS One. 2012 Mar 19;7(3):e33735. doi: 10.1371/journal.pone.0033735 (PMC3307765; doi:10.1371/journal.pone.0033735)
Supplement: Table S1 — Sequences with significant BLAST matches against Nr and Swiss-Prot database. (XLS) [file pone.0033735.s001.xls]

geneID	geneLength	JingChaoZuZhi2_rawreads(7261866)	JingChaoZuZhi2_RPKM	Nr-ID	Nr-Score	Nr-Evalue	Nr-annotation	Swissprot-ID	Swissprot-Score	Swissprot-Evalue	Swissprot-annotation
Unigene10000_JingChaoZuZhi2	1463	104	9.7891	gi|170053340|ref|XP_001862628.1|	231	1.00E-108	leucine-rich repeat serine/threonine-protein kinase 1 [Culex quinquefasciatus] >gi|167873937|gb|EDS37320.1| leucine-rich repeat serine/threonine-protein kinase 1 [Culex quinquefasciatus]	sp|Q9TZM3|LRK1_CAEEL	113	8.00E-45	Leucine-rich repeat serine/threonine-protein kinase 1 OS=Caenorhabditis elegans GN=lrk-1 PE=1 SV=6
Unigene10001_JingChaoZuZhi2	378	51	18.5793	gi|195066845|ref|XP_001996849.1|	60.8	1.00E-08	GH12985 [Drosophila grimshawi] >gi|193896233|gb|EDV95099.1| GH12985 [Drosophila grimshawi]	--	--	--	--
Unigene10002_JingChaoZuZhi2	1590	266	23.0375	gi|198462997|ref|XP_001352647.2|	100	1.00E-19	GA10945 [Drosophila pseudoobscura pseudoobscura] >gi|198151068|gb|EAL30145.2| GA10945 [Drosophila pseudoobscura pseudoobscura]	sp|Q9N294|B3GT5_PANPA	62.8	7.00E-09	Beta-1,3-galactosyltransferase 5 (Fragment) OS=Pan paniscus GN=B3GALT5 PE=3 SV=1
Unigene10003_JingChaoZuZhi2	342	51	20.5351	--	--	--	--	--	--	--	--
Unigene10004_JingChaoZuZhi2	313	27	11.8788	--	--	--	--	--	--	--	--
Unigene10005_JingChaoZuZhi2	1545	364	32.4433	gi|125901787|gb|ABN58714.1|	140	4.00E-42	pol-like protein [Biomphalaria glabrata]	sp|Q95SX7|RTBS_DROME	85.9	2.00E-23	Probable RNA-directed DNA polymerase from transposon BS OS=Drosophila melanogaster GN=RTase PE=2 SV=1
Unigene10006_JingChaoZuZhi2	273	30	15.1325	--	--	--	--	--	--	--	--
Unigene10007_JingChaoZuZhi2	374	36	13.2551	--	--	--	--	--	--	--	--
Unigene10008_JingChaoZuZhi2	1050	274	35.9346	gi|119627579|gb|EAX07174.1|	77	5.00E-16	hCG1793893 [Homo sapiens]	sp|Q9T0K5|LRX3_ARATH	71.6	9.00E-12	Leucine-rich repeat extensin-like protein 3 OS=Arabidopsis thaliana GN=LRX3 PE=1 SV=1
Unigene10009_JingChaoZuZhi2	355	19	7.3702	--	--	--	--	--	--	--	--
Unigene1000_JingChaoZuZhi2	348	61	24.1381	gi|268557034|ref|XP_002636506.1|	78.6	6.00E-14	Hypothetical protein CBG23181 [Caenorhabditis briggsae]	sp|A5E4P1|PXR1_LODEL	71.6	1.00E-12	Protein PXR1 OS=Lodderomyces elongisporus GN=PXR1 PE=3 SV=1
Unigene10010_JingChaoZuZhi2	294	12	5.6206	--	--	--	--	--	--	--	--
Unigene10011_JingChaoZuZhi2	373	31	11.4447	gi|307205968|gb|EFN84094.1|	149	3.00E-35	Dehydrogenase/reductase SDR family member 7 [Harpegnathos saltator]	sp|Q9CXR1|DHRS7_MOUSE	93.2	4.00E-19	Dehydrogenase/reductase SDR family member 7 OS=Mus musculus GN=Dhrs7 PE=2 SV=2
Unigene10012_JingChaoZuZhi2	1701	252	20.4008	gi|110760340|ref|XP_393655.3|	97.1	2.00E-53	PREDICTED: similar to jitterbug CG30092-PD, isoform D [Apis mellifera]	sp|Q75JC9|Y8484_DICDI	46.6	5.00E-10	Uncharacterized protein DDB_G0271670 OS=Dictyostelium discoideum GN=DDB_G0271670 PE=4 SV=1
Unigene10013_JingChaoZuZhi2	277	10	4.9713	--	--	--	--	--	--	--	--
Unigene10014_JingChaoZuZhi2	1378	271	27.0814	gi|156538166|ref|XP_001600591.1|	198	5.00E-49	PREDICTED: similar to CG17652-PA [Nasonia vitripennis]	sp|Q08DU1|UTP23_BOVIN	181	1.00E-44	rRNA-processing protein UTP23 homolog OS=Bos taurus GN=UTP23 PE=2 SV=1
Unigene10015_JingChaoZuZhi2	485	33	9.3697	gi|118404746|ref|NP_001072606.1|	75.9	6.00E-26	ligand of numb-protein X 2 [Xenopus (Silurana) tropicalis] >gi|114107717|gb|AAI22985.1| PDZ domain containing ring finger 1 [Xenopus (Silurana) tropicalis]	sp|Q91XL2|LNX2_MOUSE	77	2.00E-26	Ligand of Numb protein X 2 OS=Mus musculus GN=Lnx2 PE=1 SV=1
Unigene10016_JingChaoZuZhi2	1012	106	14.4237	gi|237838763|ref|XP_002368679.1|	63.5	1.00E-08	voltage gated chloride channel domain-containing protein [Toxoplasma gondii ME49] >gi|211966343|gb|EEB01539.1| voltage gated chloride channel domain-containing protein [Toxoplasma gondii ME49]	sp|Q9SX31|PERK9_ARATH	63.5	2.00E-09	Proline-rich receptor-like protein kinase PERK9 OS=Arabidopsis thaliana GN=PERK9 PE=2 SV=1
Unigene10017_JingChaoZuZhi2	672	164	33.6067	gi|115931431|ref|XP_001185218.1|	135	1.00E-30	PREDICTED: similar to Syne-1B [Strongylocentrotus purpuratus]	sp|Q75JC9|Y8484_DICDI	104	4.00E-22	Uncharacterized protein DDB_G0271670 OS=Dictyostelium discoideum GN=DDB_G0271670 PE=4 SV=1
Unigene10018_JingChaoZuZhi2	790	74	12.899	--	--	--	--	--	--	--	--
Unigene10019_JingChaoZuZhi2	425	71	23.0049	gi|193669358|ref|XP_001948788.1|	108	6.00E-23	PREDICTED: similar to CG9395 CG9395-PA [Acyrthosiphon pisum]	--	--	--	--
Unigene1001_JingChaoZuZhi2	447	82	25.2614	gi|170575217|ref|XP_001893148.1|	110	2.00E-23	Hypothetical 17.1 kDa protein in PUR5 3'region [Brugia malayi]	sp|Q69566|U88_HHV6U	107	2.00E-23	Uncharacterized protein U88 OS=Human herpesvirus 6A (strain Uganda-1102) GN=U88 PE=4 SV=1
Unigene10020_JingChaoZuZhi2	587	85	19.9403	--	--	--	--	--	--	--	--
Unigene10021_JingChaoZuZhi2	472	14	4.0845	gi|156552714|ref|XP_001599274.1|	75.5	4.00E-23	PREDICTED: similar to GA17529-PA [Nasonia vitripennis]	sp|O94889|KLH18_HUMAN	56.6	6.00E-17	Kelch-like protein 18 OS=Homo sapiens GN=KLHL18 PE=2 SV=3
Unigene10022_JingChaoZuZhi2	1603	345	29.6372	gi|110751134|ref|XP_396581.3|	798	0	PREDICTED: similar to SH2 domain binding protein 1 [Apis mellifera]	sp|Q62018|CTR9_MOUSE	746	0	RNA polymerase-associated protein CTR9 homolog OS=Mus musculus GN=Ctr9 PE=1 SV=2
Unigene10023_JingChaoZuZhi2	291	29	13.7232	--	--	--	--	--	--	--	--
Unigene10024_JingChaoZuZhi2	255	12	6.4803	--	--	--	--	--	--	--	--
Unigene10025_JingChaoZuZhi2	305	45	20.3172	--	--	--	--	--	--	--	--
Unigene10026_JingChaoZuZhi2	655	93	19.5521	--	--	--	--	--	--	--	--
Unigene10027_JingChaoZuZhi2	699	50	9.8502	gi|189239931|ref|XP_001813815.1|	362	8.00E-99	PREDICTED: similar to Myosin heavy chain CG17927-PF isoform 5 [Tribolium castaneum]	sp|P05661|MYSA_DROME	351	3.00E-96	Myosin heavy chain, muscle OS=Drosophila melanogaster GN=Mhc PE=1 SV=4
Unigene10028_JingChaoZuZhi2	280	21	10.3279	--	--	--	--	--	--	--	--
Unigene10029_JingChaoZuZhi2	427	25	8.0624	--	--	--	--	--	--	--	--
Unigene1002_JingChaoZuZhi2	1342	233	23.9087	gi|123439757|ref|XP_001310646.1|	160	1.00E-37	smooth muscle caldesmon [Trichomonas vaginalis G3]	sp|Q07283|TRHY_HUMAN	105	6.00E-22	Trichohyalin OS=Homo sapiens GN=TCHH PE=1 SV=2
Unigene10030_JingChaoZuZhi2	374	26	9.5731	gi|66826965|ref|XP_646837.1|	55.8	4.00E-07	hypothetical protein DDB_G0268922 [Dictyostelium discoideum AX4] >gi|60475114|gb|EAL73050.1| hypothetical protein DDB_G0268922 [Dictyostelium discoideum AX4]	--	--	--	--
Unigene10031_JingChaoZuZhi2	587	38	8.9145	--	--	--	--	sp|Q70E73|RAPH1_HUMAN	51.6	3.00E-06	Ras-associated and pleckstrin homology domains-containing protein 1 OS=Homo sapiens GN=RAPH1 PE=1 SV=3
Unigene10032_JingChaoZuZhi2	3325	1133	46.9235	gi|118098719|ref|XP_415236.2|	259	3.00E-92	PREDICTED: similar to neutral sphingomyelinase 3 isoform 2 [Gallus gallus]	sp|Q6ZPR5|NSMA3_MOUSE	264	2.00E-90	Sphingomyelin phosphodiesterase 4 OS=Mus musculus GN=Smpd4 PE=2 SV=2
Unigene10033_JingChaoZuZhi2	336	44	18.0329	--	--	--	--	--	--	--	--
Unigene10034_JingChaoZuZhi2	518	43	11.4312	gi|307212210|gb|EFN88044.1|	147	2.00E-51	Dystrophin [Harpegnathos saltator]	sp|P46939|UTRO_HUMAN	105	2.00E-39	Utrophin OS=Homo sapiens GN=UTRN PE=1 SV=2
Unigene10035_JingChaoZuZhi2	351	27	10.5927	gi|119624987|gb|EAX04582.1|	57.8	2.00E-12	hCG1999844 [Homo sapiens]	sp|Q8MP30|Y7791_DICDI	61.2	2.00E-12	Uncharacterized histidine-rich protein DDB_G0274557 OS=Dictyostelium discoideum GN=DDB_G0274557 PE=4 SV=1
Unigene10036_JingChaoZuZhi2	323	39	16.627	--	--	--	--	--	--	--	--
Unigene10037_JingChaoZuZhi2	274	16	8.0412	--	--	--	--	--	--	--	--
Unigene10038_JingChaoZuZhi2	856	76	12.2262	gi|82409002|gb|ABB73282.1|	77.4	6.00E-13	reverse transcriptase [Penaeus monodon]	--	--	--	--
Unigene10039_JingChaoZuZhi2	1312	100	10.4959	gi|221476138|ref|NP_001137839.1|	58.9	4.00E-07	CG10600, isoform B [Drosophila melanogaster] >gi|220902074|gb|ACL83045.1| CG10600, isoform B [Drosophila melanogaster]	sp|Q54ER5|FORJ_DICDI	34.3	3.00E-06	Formin-J OS=Dictyostelium discoideum GN=forJ PE=1 SV=1
Unigene1003_JingChaoZuZhi2	310	69	30.6506	--	--	--	--	--	--	--	--
Unigene10040_JingChaoZuZhi2	277	10	4.9713	gi|224044366|ref|XP_002190030.1|	48.9	4.00E-13	PREDICTED: ring finger protein 160 [Taeniopygia guttata]	sp|Q6A009|RN160_MOUSE	47.8	2.00E-13	RING finger protein 160 OS=Mus musculus GN=Rnf160 PE=1 SV=2
Unigene10041_JingChaoZuZhi2	262	9	4.7303	--	--	--	--	--	--	--	--
Unigene10042_JingChaoZuZhi2	873	184	29.0239	gi|154412515|ref|XP_001579290.1|	74.3	1.00E-14	dentin sialophosphoprotein precursor [Trichomonas vaginalis G3]	sp|P32583|SRP40_YEAST	78.6	5.00E-14	Suppressor protein SRP40 OS=Saccharomyces cerevisiae GN=SRP40 PE=1 SV=2
Unigene10043_JingChaoZuZhi2	334	66	27.2113	--	--	--	--	--	--	--	--
Unigene10044_JingChaoZuZhi2	735	65	12.1781	--	--	--	--	--	--	--	--
Unigene10045_JingChaoZuZhi2	804	146	25.0063	gi|156544518|ref|XP_001607019.1|	79.7	1.00E-28	PREDICTED: similar to Nudix (nucleoside diphosphate linked moiety X)-type motif 2 [Nasonia vitripennis]	sp|P50583|AP4A_HUMAN	71.6	6.00E-26	Bis(5'-nucleosyl)-tetraphosphatase [asymmetrical] OS=Homo sapiens GN=NUDT2 PE=1 SV=3
Unigene10046_JingChaoZuZhi2	408	22	7.4253	gi|307179551|gb|EFN67865.1|	113	2.00E-24	Metal-response element-binding transcription factor 2 [Camponotus floridanus]	sp|Q5T6S3|PHF19_HUMAN	89.4	7.00E-18	PHD finger protein 19 OS=Homo sapiens GN=PHF19 PE=1 SV=1
Unigene10047_JingChaoZuZhi2	258	30	16.0123	gi|158293921|ref|XP_315269.4|	161	7.00E-39	AGAP011516-PA [Anopheles gambiae str. PEST] >gi|157016476|gb|EAA10668.4| AGAP011516-PA [Anopheles gambiae str. PEST]	sp|P45887|ACT5_BACDO	161	1.00E-39	Actin-5, muscle-specific OS=Bactrocera dorsalis PE=2 SV=1
Unigene10048_JingChaoZuZhi2	242	25	14.2258	gi|115741821|ref|XP_001198670.1|	52.4	5.00E-06	PREDICTED: hypothetical protein [Strongylocentrotus purpuratus] >gi|115932201|ref|XP_001193185.1| PREDICTED: hypothetical protein [Strongylocentrotus purpuratus]	--	--	--	--
Unigene10049_JingChaoZuZhi2	689	53	10.5927	gi|193594302|ref|XP_001944723.1|	85.5	1.00E-15	PREDICTED: similar to Y54G2A.42 [Acyrthosiphon pisum]	--	--	--	--
Unigene1004_JingChaoZuZhi2	216	18	11.4755	gi|59799395|gb|AAX07243.1|	54.7	1.00E-06	reverse transcriptase [Brotheas granulatus]	--	--	--	--
Unigene10050_JingChaoZuZhi2	957	55	7.9141	gi|82409002|gb|ABB73282.1|	84	8.00E-15	reverse transcriptase [Penaeus monodon]	--	--	--	--
Unigene10051_JingChaoZuZhi2	828	57	9.4797	gi|281200469|gb|EFA74689.1|	61.6	3.00E-08	non-receptor tyrosine kinase [Polysphondylium pallidum PN500]	--	--	--	--
Unigene10052_JingChaoZuZhi2	386	76	27.113	--	--	--	--	--	--	--	--
Unigene10053_JingChaoZuZhi2	875	83	13.0624	gi|307174648|gb|EFN65047.1|	194	3.00E-48	Serine/threonine-protein kinase PAK 2 [Camponotus floridanus]	sp|Q7YQL3|PAK3_PONPY	173	2.00E-42	Serine/threonine-protein kinase PAK 3 OS=Pongo pygmaeus GN=PAK3 PE=2 SV=1
Unigene10054_JingChaoZuZhi2	457	34	10.2451	--	--	--	--	--	--	--	--
Unigene10055_JingChaoZuZhi2	483	56	15.9659	--	--	--	--	--	--	--	--
Unigene10056_JingChaoZuZhi2	1387	217	21.5444	--	--	--	--	--	--	--	--
Unigene10057_JingChaoZuZhi2	305	20	9.0299	--	--	--	--	--	--	--	--
Unigene10058_JingChaoZuZhi2	488	51	14.3914	gi|193700052|ref|XP_001945240.1|	92.4	1.00E-33	PREDICTED: similar to terribly reduced optic lobes CG33950-PA [Acyrthosiphon pisum]	sp|P98160|PGBM_HUMAN	66.2	2.00E-24	Basement membrane-specific heparan sulfate proteoglycan core protein OS=Homo sapiens GN=HSPG2 PE=1 SV=3
Unigene10059_JingChaoZuZhi2	421	33	10.794	--	--	--	--	--	--	--	--
Unigene1005_JingChaoZuZhi2	360	37	14.1531	--	--	--	--	--	--	--	--
Unigene10060_JingChaoZuZhi2	288	47	22.4728	--	--	--	--	--	--	--	--
Unigene10061_JingChaoZuZhi2	1173	310	36.3928	--	--	--	--	--	--	--	--
Unigene10062_JingChaoZuZhi2	414	70	23.2836	gi|308322647|gb|ADO28461.1|	103	2.00E-21	chromosome transmission fidelity protein 8-like protein [Ictalurus punctatus]	sp|P0C6T1|CTF8_RAT	102	1.00E-21	Chromosome transmission fidelity protein 8 homolog OS=Rattus norvegicus GN=Chtf8 PE=3 SV=1
Unigene10063_JingChaoZuZhi2	1274	119	12.8626	gi|111307761|gb|AAI21193.1|	58.2	7.00E-07	Mki67 protein [Xenopus laevis]	--	--	--	--
Unigene10064_JingChaoZuZhi2	823	60	10.0393	gi|171543909|ref|NP_001116405.1|	325	8.00E-96	receptor interacting protein kinase 5 [Oryzias latipes] >gi|145105345|gb|ABP35581.1| dusty protein kinase [Oryzias latipes]	sp|Q4VSN3|DUSTY_TETNG	324	3.00E-96	Dual serine/threonine and tyrosine protein kinase OS=Tetraodon nigroviridis GN=dstyk PE=2 SV=1
Unigene10065_JingChaoZuZhi2	307	14	6.2797	--	--	--	--	--	--	--	--
Unigene10066_JingChaoZuZhi2	766	60	10.7863	gi|195575603|ref|XP_002077667.1|	103	6.00E-21	GD23040 [Drosophila simulans] >gi|194189676|gb|EDX03252.1| GD23040 [Drosophila simulans]	sp|P36044|MNN4_YEAST	87.8	7.00E-17	Protein MNN4 OS=Saccharomyces cerevisiae GN=MNN4 PE=2 SV=2
Unigene10067_JingChaoZuZhi2	406	25	8.4794	gi|91089387|ref|XP_973863.1|	150	1.00E-35	PREDICTED: similar to AGAP002913-PA [Tribolium castaneum]	sp|Q8IXL6|DMP4_HUMAN	113	3.00E-25	Dentin matrix protein 4 OS=Homo sapiens GN=FAM20C PE=1 SV=1
Unigene10068_JingChaoZuZhi2	287	43	20.6319	--	--	--	--	--	--	--	--
Unigene10069_JingChaoZuZhi2	2180	607	38.3428	--	--	--	--	--	--	--	--
Unigene1006_JingChaoZuZhi2	273	10	5.0442	--	--	--	--	--	--	--	--
Unigene10070_JingChaoZuZhi2	712	66	12.7648	--	--	--	--	--	--	--	--
Unigene10071_JingChaoZuZhi2	688	51	10.2078	gi|110762794|ref|XP_623835.2|	124	3.00E-49	PREDICTED: similar to CG11596-PA, isoform A [Apis mellifera]	sp|Q8N4J0|CI041_HUMAN	112	6.00E-40	UPF0586 protein C9orf41 OS=Homo sapiens GN=C9orf41 PE=1 SV=1
Unigene10072_JingChaoZuZhi2	336	22	9.0164	gi|91085935|ref|XP_970328.1|	68.2	9.00E-23	PREDICTED: similar to RE08455p [Tribolium castaneum]	sp|Q8K010|OPLA_MOUSE	65.5	1.00E-17	5-oxoprolinase OS=Mus musculus GN=Oplah PE=2 SV=1
Unigene10073_JingChaoZuZhi2	316	11	4.7936	gi|307185859|gb|EFN71700.1|	87.4	1.00E-16	G1/S-specific cyclin-D3 [Camponotus floridanus]	sp|P53782|CCND2_XENLA	78.6	1.00E-14	G1/S-specific cyclin-D2 OS=Xenopus laevis GN=ccnd2 PE=2 SV=1
Unigene10074_JingChaoZuZhi2	315	10	4.3716	--	--	--	--	--	--	--	--
Unigene10075_JingChaoZuZhi2	287	22	10.5558	--	--	--	--	--	--	--	--
Unigene10076_JingChaoZuZhi2	461	30	8.9613	--	--	--	--	--	--	--	--
Unigene10077_JingChaoZuZhi2	270	11	5.6102	gi|166240117|ref|XP_001732947.1|	50.1	8.00E-13	ATP-dependent DNA helicase RecQ family protein [Dictyostelium discoideum AX4] >gi|165988751|gb|EDR41122.1| ATP-dependent DNA helicase RecQ family protein [Dictyostelium discoideum AX4]	sp|Q1ZXA9|Y9218_DICDI	50.4	2.00E-13	Uncharacterized protein DDB_G0292186 OS=Dictyostelium discoideum GN=DDB_G0292186 PE=4 SV=1
Unigene10078_JingChaoZuZhi2	642	56	12.0117	gi|156549718|ref|XP_001605627.1|	112	5.00E-46	PREDICTED: similar to GA13844-PA [Nasonia vitripennis]	sp|Q69ZW3|EHBP1_MOUSE	101	3.00E-38	EH domain-binding protein 1 OS=Mus musculus GN=Ehbp1 PE=1 SV=2
Unigene10079_JingChaoZuZhi2	275	5	2.5037	--	--	--	--	--	--	--	--
Unigene1007_JingChaoZuZhi2	1340	592	60.8371	gi|307212064|gb|EFN87947.1|	726	0	26S protease regulatory subunit 8 [Harpegnathos saltator]	sp|P54814|PRS8_MANSE	726	0	26S protease regulatory subunit 8 OS=Manduca sexta PE=2 SV=1
Unigene10080_JingChaoZuZhi2	404	37	12.6117	gi|110761256|ref|XP_396782.3|	58.2	9.00E-08	PREDICTED: similar to CG9776-PA, isoform A [Apis mellifera]	sp|Q7G6K7|FH3_ORYSJ	56.2	6.00E-08	Formin-like protein 3 OS=Oryza sativa subsp. japonica GN=FH3 PE=2 SV=2
Unigene10081_JingChaoZuZhi2	276	13	6.4861	--	--	--	--	--	--	--	--
Unigene10082_JingChaoZuZhi2	310	20	8.8842	gi|291224130|ref|XP_002732054.1|	107	1.00E-22	PREDICTED: CG6650-like [Saccoglossus kowalevskii]	sp|Q86S40|ADPGK_CAEEL	49.7	6.00E-06	Probable ADP-dependent glucokinase OS=Caenorhabditis elegans GN=C50D2.7 PE=1 SV=1
Unigene10083_JingChaoZuZhi2	763	96	17.326	gi|72547036|ref|XP_843163.1|	55.1	3.00E-06	proteophosphoglycan 5 [Leishmania major strain Friedlin] >gi|70905642|gb|AAZ14281.1| proteophosphoglycan 5 [Leishmania major strain Friedlin]	--	--	--	--
Unigene10084_JingChaoZuZhi2	386	7	2.4973	gi|268578395|ref|XP_002644180.1|	54.7	1.00E-06	Hypothetical protein CBG17156 [Caenorhabditis briggsae]	sp|P36044|MNN4_YEAST	51.2	2.00E-06	Protein MNN4 OS=Saccharomyces cerevisiae GN=MNN4 PE=2 SV=2
Unigene10085_JingChaoZuZhi2	313	16	7.0393	--	--	--	--	--	--	--	--
Unigene10086_JingChaoZuZhi2	308	20	8.9419	--	--	--	--	--	--	--	--
Unigene10087_JingChaoZuZhi2	422	29	9.4632	--	--	--	--	--	--	--	--
Unigene10088_JingChaoZuZhi2	277	13	6.4627	--	--	--	--	--	--	--	--
Unigene10089_JingChaoZuZhi2	257	5	2.6791	--	--	--	--	--	--	--	--
Unigene1008_JingChaoZuZhi2	1216	296	33.5205	gi|110764536|ref|XP_396097.3|	297	6.00E-79	PREDICTED: similar to CG16865-PA [Apis mellifera]	sp|Q3T197|CX056_BOVIN	254	7.00E-67	UPF0428 protein CXorf56 homolog OS=Bos taurus PE=2 SV=1
Unigene10090_JingChaoZuZhi2	322	20	8.5531	--	--	--	--	--	--	--	--
Unigene10091_JingChaoZuZhi2	318	23	9.9598	gi|307210678|gb|EFN87101.1|	59.3	4.00E-08	Gustatory receptor trehalose 1 [Harpegnathos saltator]	sp|Q9W534|MOODY_DROME	54.3	2.00E-07	G-protein coupled receptor moody OS=Drosophila melanogaster GN=moody PE=2 SV=2
Unigene10092_JingChaoZuZhi2	399	27	9.3184	gi|115668650|ref|XP_001198937.1|	98.6	3.00E-23	PREDICTED: similar to endonuclease-reverse transcriptase [Strongylocentrotus purpuratus] >gi|115976177|ref|XP_001194706.1| PREDICTED: similar to endonuclease-reverse transcriptase [Strongylocentrotus purpuratus]	--	--	--	--
Unigene10093_JingChaoZuZhi2	404	19	6.4763	--	--	--	--	--	--	--	--
Unigene10094_JingChaoZuZhi2	311	18	7.9701	--	--	--	--	--	--	--	--
Unigene10095_JingChaoZuZhi2	394	32	11.1842	--	--	--	--	--	--	--	--
Unigene10096_JingChaoZuZhi2	466	40	11.8202	--	--	--	--	--	--	--	--
Unigene10097_JingChaoZuZhi2	298	30	13.863	--	--	--	--	--	--	--	--
Unigene10098_JingChaoZuZhi2	266	17	8.8007	--	--	--	--	--	--	--	--
Unigene10099_JingChaoZuZhi2	1891	332	24.1768	--	--	--	--	--	--	--	--
Unigene1009_JingChaoZuZhi2	271	27	13.7198	--	--	--	--	--	--	--	--
Unigene100_JingChaoZuZhi2	346	27	10.7458	--	--	--	--	--	--	--	--
Unigene10100_JingChaoZuZhi2	314	7	3.0699	--	--	--	--	--	--	--	--
Unigene10101_JingChaoZuZhi2	260	7	3.7075	--	--	--	--	--	--	--	--
Unigene10102_JingChaoZuZhi2	466	29	8.5697	gi|307206057|gb|EFN84150.1|	99.8	2.00E-54	Phosphorylase b kinase gamma catalytic chain, skeletal muscle isoform [Harpegnathos saltator]	sp|P13286|PHKG1_RAT	77.4	1.00E-38	Phosphorylase b kinase gamma catalytic chain, skeletal muscle isoform OS=Rattus norvegicus GN=Phkg1 PE=2 SV=2
Unigene10103_JingChaoZuZhi2	988	139	19.3736	gi|66520070|ref|XP_625206.1|	278	2.00E-73	PREDICTED: similar to FRG1 protein homolog [Apis mellifera]	sp|O73747|FRG1_TAKRU	240	1.00E-62	Protein FRG1 OS=Takifugu rubripes GN=frg1 PE=2 SV=1
Unigene10104_JingChaoZuZhi2	327	15	6.3168	--	--	--	--	--	--	--	--
Unigene10105_JingChaoZuZhi2	539	34	8.6864	gi|301791474|ref|XP_002930705.1|	168	1.00E-40	PREDICTED: alpha-(1,3)-fucosyltransferase 10-like [Ailuropoda melanoleuca]	sp|Q5F2N4|FUT10_CANFA	167	4.00E-41	Alpha-(1,3)-fucosyltransferase 10 OS=Canis familiaris GN=FUT10 PE=2 SV=1
Unigene10106_JingChaoZuZhi2	412	20	6.6847	gi|170575217|ref|XP_001893148.1|	70.5	2.00E-11	Hypothetical 17.1 kDa protein in PUR5 3'region [Brugia malayi]	sp|Q69566|U88_HHV6U	59.7	5.00E-09	Uncharacterized protein U88 OS=Human herpesvirus 6A (strain Uganda-1102) GN=U88 PE=4 SV=1
Unigene10107_JingChaoZuZhi2	296	19	8.8392	--	--	--	--	--	--	--	--
Unigene10108_JingChaoZuZhi2	708	102	19.839	gi|158297736|ref|XP_317925.4|	99.4	1.00E-19	AGAP011395-PA [Anopheles gambiae str. PEST] >gi|157014720|gb|EAA13037.4| AGAP011395-PA [Anopheles gambiae str. PEST]	sp|P49756|RBM25_HUMAN	88.6	4.00E-17	RNA-binding protein 25 OS=Homo sapiens GN=RBM25 PE=1 SV=3
Unigene10109_JingChaoZuZhi2	469	34	9.9829	--	--	--	--	--	--	--	--
Unigene1010_JingChaoZuZhi2	531	47	12.1886	gi|189525928|ref|XP_694417.3|	28.9	3.00E-06	PREDICTED: hypothetical protein [Danio rerio]	sp|Q9C6S1|FH14_ARATH	31.6	7.00E-07	Formin-like protein 14 OS=Arabidopsis thaliana GN=FH14 PE=1 SV=3
Unigene10110_JingChaoZuZhi2	265	14	7.275	--	--	--	--	--	--	--	--
Unigene10111_JingChaoZuZhi2	258	7	3.7362	--	--	--	--	--	--	--	--
Unigene10112_JingChaoZuZhi2	2434	727	41.1307	gi|254553414|ref|NP_001005426.2|	143	3.00E-32	zinc finger CW-type PWWP domain protein 1 [Mus musculus] >gi|61197025|gb|AAX39493.1| ZCWPW1 [Mus musculus]	sp|Q6IR42|ZCPW1_MOUSE	143	7.00E-33	Zinc finger CW-type PWWP domain protein 1 OS=Mus musculus GN=Zcwpw1 PE=2 SV=1
Unigene10113_JingChaoZuZhi2	540	53	13.5156	gi|115916091|ref|XP_001198200.1|	56.6	4.00E-07	PREDICTED: similar to protein F28E10.3 [imported] - Caenorhabditis elegans [Strongylocentrotus purpuratus] >gi|115974535|ref|XP_001187905.1| PREDICTED: similar to protein F28E10.3 [imported] - Caenorhabditis elegans [Strongylocentrotus purpuratus]	sp|Q10126|YSM6_CAEEL	53.1	1.00E-06	Putative uncharacterized transposon-derived protein F52C9.6 OS=Caenorhabditis elegans GN=F52C9.6 PE=5 SV=1
Unigene10114_JingChaoZuZhi2	432	51	16.2569	--	--	--	--	--	--	--	--
Unigene10115_JingChaoZuZhi2	797	142	24.5348	--	--	--	--	--	--	--	--
Unigene10116_JingChaoZuZhi2	300	15	6.8853	gi|195486226|ref|XP_002091415.1|	53.5	2.00E-06	GE13641 [Drosophila yakuba] >gi|194177516|gb|EDW91127.1| GE13641 [Drosophila yakuba]	sp|O44386|ITA3_DROME	52.8	7.00E-07	Integrin alpha-PS3 OS=Drosophila melanogaster GN=scb PE=1 SV=2
Unigene10117_JingChaoZuZhi2	489	114	32.1032	gi|307192747|gb|EFN75846.1|	58.5	8.00E-08	G1/S-specific cyclin-D1 [Harpegnathos saltator]	sp|Q8STA9|Y5G8_ENCCU	53.5	6.00E-07	UPF0329 protein ECU05_1680/ECU11_0050 OS=Encephalitozoon cuniculi GN=ECU05_1680 PE=3 SV=1
Unigene10118_JingChaoZuZhi2	419	26	8.545	--	--	--	--	--	--	--	--
Unigene10119_JingChaoZuZhi2	340	18	7.2903	gi|291401982|ref|XP_002717391.1|	52.8	4.00E-06	PREDICTED: RNA polymerase II transcription factor TAFII140 [Oryctolagus cuniculus]	sp|Q5HZG4|TAF3_MOUSE	51.2	2.00E-06	Transcription initiation factor TFIID subunit 3 OS=Mus musculus GN=Taf3 PE=1 SV=2
Unigene1011_JingChaoZuZhi2	372	45	16.6579	--	--	--	--	--	--	--	--
Unigene10120_JingChaoZuZhi2	400	82	28.2297	--	--	--	--	--	--	--	--
Unigene10121_JingChaoZuZhi2	463	64	19.0349	--	--	--	--	--	--	--	--
Unigene10122_JingChaoZuZhi2	296	7	3.2566	gi|158300438|ref|XP_320360.4|	105	4.00E-22	AGAP012175-PA [Anopheles gambiae str. PEST] >gi|157013159|gb|EAA00566.4| AGAP012175-PA [Anopheles gambiae str. PEST]	sp|Q62910|SYNJ1_RAT	67.8	2.00E-11	Synaptojanin-1 OS=Rattus norvegicus GN=Synj1 PE=1 SV=3
Unigene10123_JingChaoZuZhi2	313	18	7.9192	--	--	--	--	--	--	--	--
Unigene10124_JingChaoZuZhi2	262	13	6.8327	--	--	--	--	--	--	--	--
Unigene10125_JingChaoZuZhi2	494	64	17.8404	gi|307203104|gb|EFN82284.1|	124	5.00E-46	Anaphase-promoting complex subunit 1 [Harpegnathos saltator]	sp|Q9H1A4|APC1_HUMAN	126	2.00E-40	Anaphase-promoting complex subunit 1 OS=Homo sapiens GN=ANAPC1 PE=1 SV=1
Unigene10126_JingChaoZuZhi2	254	5	2.7107	--	--	--	--	--	--	--	--
Unigene10127_JingChaoZuZhi2	251	15	8.2294	--	--	--	--	--	--	--	--
Unigene10128_JingChaoZuZhi2	476	79	22.8545	gi|119627579|gb|EAX07174.1|	55.1	8.00E-07	hCG1793893 [Homo sapiens]	sp|Q10Q99|FH8_ORYSJ	55.1	2.00E-07	Formin-like protein 8 OS=Oryza sativa subsp. japonica GN=FH8 PE=2 SV=1
Unigene10129_JingChaoZuZhi2	484	27	7.6819	gi|115678985|ref|XP_001180980.1|	94	2.00E-18	PREDICTED: similar to CG9555-PA [Strongylocentrotus purpuratus] >gi|115966217|ref|XP_001197056.1| PREDICTED: similar to CG9555-PA [Strongylocentrotus purpuratus]	sp|O44252|ROST_DROME	70.1	6.00E-12	Protein rolling stone OS=Drosophila melanogaster GN=rost PE=2 SV=2
Unigene1012_JingChaoZuZhi2	430	25	8.0061	--	--	--	--	--	--	--	--
Unigene10130_JingChaoZuZhi2	290	14	6.6479	--	--	--	--	--	--	--	--
Unigene10131_JingChaoZuZhi2	263	11	5.7596	--	--	--	--	--	--	--	--
Unigene10132_JingChaoZuZhi2	333	34	14.06	--	--	--	--	--	--	--	--
Unigene10133_JingChaoZuZhi2	2260	422	25.7132	gi|4691352|emb|CAB41634.1|	981	0	iron regulatory protein 1-like protein [Pacifastacus leniusculus]	sp|P28271|ACOC_MOUSE	807	0	Cytoplasmic aconitate hydratase OS=Mus musculus GN=Aco1 PE=1 SV=2
Unigene10134_JingChaoZuZhi2	455	29	8.7768	gi|307177514|gb|EFN66625.1|	56.2	3.00E-07	Baculoviral IAP repeat-containing protein 6 [Camponotus floridanus]	--	--	--	--
Unigene10135_JingChaoZuZhi2	369	56	20.8984	--	--	--	--	--	--	--	--
Unigene10136_JingChaoZuZhi2	806	59	10.0802	gi|167524377|ref|XP_001746524.1|	59.3	2.00E-07	hypothetical protein [Monosiga brevicollis MX1] >gi|163774794|gb|EDQ88420.1| predicted protein [Monosiga brevicollis MX1]	--	--	--	--
Unigene10137_JingChaoZuZhi2	644	86	18.3893	--	--	--	--	--	--	--	--
Unigene10138_JingChaoZuZhi2	420	106	34.7543	--	--	--	--	--	--	--	--
Unigene10139_JingChaoZuZhi2	267	5	2.5788	--	--	--	--	--	--	--	--
Unigene1013_JingChaoZuZhi2	308	59	26.3787	--	--	--	--	--	--	--	--
Unigene10140_JingChaoZuZhi2	530	35	9.0938	gi|289741847|gb|ADD19671.1|	177	2.00E-43	queuine-tRNA ribosyltransferase [Glossina morsitans morsitans]	sp|Q9VPY8|TGT_DROME	163	5.00E-40	Probable queuine tRNA-ribosyltransferase OS=Drosophila melanogaster GN=Tgt PE=2 SV=1
Unigene10141_JingChaoZuZhi2	274	15	7.5386	--	--	--	--	--	--	--	--
Unigene10142_JingChaoZuZhi2	385	56	20.0299	--	--	--	--	--	--	--	--
Unigene10143_JingChaoZuZhi2	1276	160	17.2672	gi|91081243|ref|XP_975645.1|	159	5.00E-49	PREDICTED: similar to nfrkb [Tribolium castaneum]	sp|Q6P4L9|NFRKB_XENTR	122	4.00E-27	Nuclear factor related to kappa-B-binding protein OS=Xenopus tropicalis GN=nfrkb PE=2 SV=1
Unigene10144_JingChaoZuZhi2	270	6	3.0601	--	--	--	--	--	--	--	--
Unigene10145_JingChaoZuZhi2	349	230	90.7516	--	--	--	--	--	--	--	--
Unigene10146_JingChaoZuZhi2	330	7	2.921	--	--	--	--	--	--	--	--
Unigene10147_JingChaoZuZhi2	340	15	6.0752	gi|195350163|ref|XP_002041611.1|	67	2.00E-10	GM16758 [Drosophila sechellia] >gi|194123384|gb|EDW45427.1| GM16758 [Drosophila sechellia]	sp|P36044|MNN4_YEAST	55.8	8.00E-08	Protein MNN4 OS=Saccharomyces cerevisiae GN=MNN4 PE=2 SV=2
Unigene10148_JingChaoZuZhi2	341	16	6.4613	gi|73990650|ref|XP_854027.1|	91.3	9.00E-18	PREDICTED: similar to acid phosphatase-like 2 [Canis familiaris]	sp|Q8TE99|ACPL2_HUMAN	90.1	4.00E-18	Acid phosphatase-like protein 2 OS=Homo sapiens GN=ACPL2 PE=2 SV=1
Unigene10149_JingChaoZuZhi2	417	53	17.5022	gi|195353497|ref|XP_002043241.1|	59.3	4.00E-08	GM17531 [Drosophila sechellia] >gi|194127339|gb|EDW49382.1| GM17531 [Drosophila sechellia]	sp|Q02817|MUC2_HUMAN	51.6	1.00E-06	Mucin-2 OS=Homo sapiens GN=MUC2 PE=1 SV=2
Unigene1014_JingChaoZuZhi2	279	43	21.2235	--	--	--	--	--	--	--	--
Unigene10150_JingChaoZuZhi2	269	14	7.1668	gi|300794570|ref|NP_001178624.1|	67	2.00E-10	zinc finger protein 516 [Rattus norvegicus]	sp|Q7TSH3|ZN516_MOUSE	67	3.00E-11	Zinc finger protein 516 OS=Mus musculus GN=Znf516 PE=2 SV=1
Unigene10151_JingChaoZuZhi2	248	36	19.9895	--	--	--	--	--	--	--	--
Unigene10152_JingChaoZuZhi2	391	29	10.2135	--	--	--	--	--	--	--	--
Unigene10153_JingChaoZuZhi2	343	17	6.8251	--	--	--	--	--	--	--	--
Unigene10154_JingChaoZuZhi2	1154	131	15.6321	gi|50742488|ref|XP_419650.1|	117	1.00E-32	PREDICTED: similar to F-box only protein 30 [Gallus gallus]	sp|Q5XI67|FBX30_RAT	118	2.00E-32	F-box only protein 30 OS=Rattus norvegicus GN=Fbxo30 PE=2 SV=1
Unigene10155_JingChaoZuZhi2	324	15	6.3753	--	--	--	--	--	--	--	--
Unigene10156_JingChaoZuZhi2	397	29	10.0591	--	--	--	--	--	--	--	--
Unigene10157_JingChaoZuZhi2	318	14	6.0625	gi|115910574|ref|XP_001200149.1|	84	2.00E-15	PREDICTED: similar to endonuclease-reverse transcriptase [Strongylocentrotus purpuratus]	--	--	--	--
Unigene10158_JingChaoZuZhi2	328	9	3.7785	--	--	--	--	--	--	--	--
Unigene10159_JingChaoZuZhi2	420	69	22.6231	--	--	--	--	--	--	--	--
Unigene1015_JingChaoZuZhi2	571	225	54.2623	--	--	--	--	--	--	--	--
Unigene10160_JingChaoZuZhi2	685	105	21.1082	--	--	--	--	--	--	--	--
Unigene10161_JingChaoZuZhi2	271	7	3.557	--	--	--	--	--	--	--	--
Unigene10162_JingChaoZuZhi2	669	98	20.1721	--	--	--	--	--	--	--	--
Unigene10163_JingChaoZuZhi2	777	84	14.8871	gi|156549815|ref|XP_001606578.1|	145	1.00E-33	PREDICTED: similar to GA18517-PA [Nasonia vitripennis]	sp|Q8TEJ3|SH3R3_HUMAN	100	1.00E-20	SH3 domain-containing RING finger protein 3 OS=Homo sapiens GN=SH3RF3 PE=1 SV=2
Unigene10164_JingChaoZuZhi2	751	99	18.1529	gi|158300791|ref|XP_001689278.1|	89	2.00E-16	AGAP011901-PA [Anopheles gambiae str. PEST] >gi|157013331|gb|EDO63344.1| AGAP011901-PA [Anopheles gambiae str. PEST]	sp|Q9T0K5|LRX3_ARATH	86.7	2.00E-16	Leucine-rich repeat extensin-like protein 3 OS=Arabidopsis thaliana GN=LRX3 PE=1 SV=1
Unigene10165_JingChaoZuZhi2	1980	337	23.4378	gi|291227834|ref|XP_002733887.1|	532	1.00E-149	PREDICTED: WD repeat domain 24-like [Saccoglossus kowalevskii]	sp|Q7ZVL2|WDR24_DANRE	512	4.00E-144	WD repeat-containing protein 24 OS=Danio rerio GN=wdr24 PE=2 SV=1
Unigene10166_JingChaoZuZhi2	569	130	31.4617	--	--	--	--	--	--	--	--
Unigene10167_JingChaoZuZhi2	306	30	13.5006	--	--	--	--	--	--	--	--
Unigene10168_JingChaoZuZhi2	619	98	21.8015	--	--	--	--	--	--	--	--
Unigene10169_JingChaoZuZhi2	279	14	6.91	--	--	--	--	--	--	--	--
Unigene1016_JingChaoZuZhi2	593	68	15.7909	gi|62241084|dbj|BAD93698.1|	65.5	1.00E-09	vitellogenin [Gambusia affinis]	sp|Q7M732|RTL1_MOUSE	61.2	4.00E-09	Retrotransposon-like protein 1 OS=Mus musculus GN=Rtl1 PE=2 SV=1
Unigene10170_JingChaoZuZhi2	721	45	8.5947	--	--	--	--	--	--	--	--
Unigene10171_JingChaoZuZhi2	686	44	8.8324	gi|242001898|ref|XP_002435592.1|	164	2.00E-46	ankyrin repeat containing protein [Ixodes scapularis] >gi|215498928|gb|EEC08422.1| ankyrin repeat containing protein [Ixodes scapularis]	sp|Q8N957|ANKF1_HUMAN	77	1.00E-13	Ankyrin repeat and fibronectin type-III domain-containing protein 1 OS=Homo sapiens GN=ANKFN1 PE=2 SV=2
Unigene10172_JingChaoZuZhi2	367	15	5.6283	--	--	--	--	--	--	--	--
Unigene10173_JingChaoZuZhi2	479	22	6.3247	--	--	--	--	--	--	--	--
Unigene10174_JingChaoZuZhi2	422	56	18.2737	--	--	--	--	--	--	--	--
Unigene10175_JingChaoZuZhi2	272	17	8.6066	--	--	--	--	--	--	--	--
Unigene10176_JingChaoZuZhi2	271	11	5.5895	--	--	--	--	--	--	--	--
Unigene10177_JingChaoZuZhi2	568	36	8.7278	gi|28574875|ref|NP_730262.2|	73.9	3.00E-12	CG13731 [Drosophila melanogaster] >gi|28380492|gb|AAF49349.4| CG13731 [Drosophila melanogaster]	sp|Q9FLQ7|FH20_ARATH	68.6	3.00E-11	Formin-like protein 20 OS=Arabidopsis thaliana GN=FH20 PE=2 SV=2
Unigene10178_JingChaoZuZhi2	327	9	3.7901	gi|190194345|ref|NP_001121730.1|	73.6	3.00E-28	tetratricopeptide repeat protein 21B [Danio rerio] >gi|169146276|emb|CAQ13801.1| novel protein similar to vertebrate tetratricopeptide repeat domain 21A (TTC21A) [Danio rerio]	sp|Q0HA38|TT21B_MOUSE	75.5	4.00E-26	Tetratricopeptide repeat protein 21B OS=Mus musculus GN=Ttc21b PE=2 SV=1
Unigene10179_JingChaoZuZhi2	500	99	27.2657	--	--	--	--	--	--	--	--
Unigene1017_JingChaoZuZhi2	511	28	7.5455	gi|119624987|gb|EAX04582.1|	60.5	4.00E-12	hCG1999844 [Homo sapiens]	sp|Q8MP30|Y7791_DICDI	57.4	6.00E-11	Uncharacterized histidine-rich protein DDB_G0274557 OS=Dictyostelium discoideum GN=DDB_G0274557 PE=4 SV=1
Unigene10180_JingChaoZuZhi2	743	83	15.383	gi|189241551|ref|XP_966359.2|	77	6.00E-13	PREDICTED: similar to angiomotin [Tribolium castaneum]	--	--	--	--
Unigene10181_JingChaoZuZhi2	325	19	8.0505	gi|154332073|ref|XP_001561853.1|	52.8	4.00E-06	microtubule-associated protein [Leishmania braziliensis MHOM/BR/75/M2904]	--	--	--	--
Unigene10182_JingChaoZuZhi2	271	10	5.0814	--	--	--	--	--	--	--	--
Unigene10183_JingChaoZuZhi2	262	11	5.7815	--	--	--	--	--	--	--	--
Unigene10184_JingChaoZuZhi2	314	19	8.3325	--	--	--	--	--	--	--	--
Unigene10185_JingChaoZuZhi2	260	12	6.3556	--	--	--	--	--	--	--	--
Unigene10186_JingChaoZuZhi2	302	19	8.6636	--	--	--	--	--	--	--	--
Unigene10187_JingChaoZuZhi2	874	125	19.6947	gi|195111926|ref|XP_002000527.1|	128	3.00E-28	GI22470 [Drosophila mojavensis] >gi|193917121|gb|EDW15988.1| GI22470 [Drosophila mojavensis]	sp|P47179|DAN4_YEAST	110	1.00E-23	Cell wall protein DAN4 OS=Saccharomyces cerevisiae GN=DAN4 PE=2 SV=1
Unigene10188_JingChaoZuZhi2	287	6	2.8789	--	--	--	--	--	--	--	--
Unigene10189_JingChaoZuZhi2	289	16	7.6238	gi|61162132|dbj|BAD91055.1|	100	1.00E-20	Af2-cadherin [Artemia franciscana]	sp|O15943|CADN_DROME	94.7	2.00E-19	Neural-cadherin OS=Drosophila melanogaster GN=CadN PE=1 SV=2
Unigene1018_JingChaoZuZhi2	250	25	13.7706	--	--	--	--	--	--	--	--
Unigene10190_JingChaoZuZhi2	333	22	9.0977	--	--	--	--	--	--	--	--
Unigene10191_JingChaoZuZhi2	616	52	11.6245	--	--	--	--	--	--	--	--
Unigene10192_JingChaoZuZhi2	417	39	12.8789	gi|307178234|gb|EFN67019.1|	143	2.00E-33	Putative methyltransferase NSUN4 [Camponotus floridanus]	sp|Q6D000|RSMB_ERWCT	64.3	2.00E-10	Ribosomal RNA small subunit methyltransferase B OS=Erwinia carotovora subsp. atroseptica GN=rsmB PE=3 SV=1
Unigene10193_JingChaoZuZhi2	321	5	2.1449	--	--	--	--	--	--	--	--
Unigene10194_JingChaoZuZhi2	1101	165	20.6371	gi|195130997|ref|XP_002009937.1|	56.2	2.00E-06	GI15642 [Drosophila mojavensis] >gi|193908387|gb|EDW07254.1| GI15642 [Drosophila mojavensis]	--	--	--	--
Unigene10195_JingChaoZuZhi2	781	63	11.1081	--	--	--	--	--	--	--	--
Unigene10196_JingChaoZuZhi2	273	26	13.1148	--	--	--	--	sp|Q9QY93|DCTP1_MOUSE	51.2	2.00E-06	dCTP pyrophosphatase 1 OS=Mus musculus GN=Dctpp1 PE=1 SV=1
Unigene10197_JingChaoZuZhi2	1449	269	25.5644	--	--	--	--	--	--	--	--
Unigene10198_JingChaoZuZhi2	317	12	5.2128	--	--	--	--	--	--	--	--
Unigene10199_JingChaoZuZhi2	328	7	2.9388	--	--	--	--	--	--	--	--
Unigene1019_JingChaoZuZhi2	545	105	26.5304	gi|308488139|ref|XP_003106264.1|	56.2	6.00E-07	CRE-COL-41 protein [Caenorhabditis remanei] >gi|308254254|gb|EFO98206.1| CRE-COL-41 protein [Caenorhabditis remanei]	--	--	--	--
Unigene101_JingChaoZuZhi2	1096	177	22.239	gi|72015146|ref|XP_783499.1|	137	7.00E-31	PREDICTED: similar to ENSANGP00000010363 [Strongylocentrotus purpuratus] >gi|115975819|ref|XP_001181545.1| PREDICTED: similar to ENSANGP00000010363 [Strongylocentrotus purpuratus]	--	--	--	--
Unigene10200_JingChaoZuZhi2	425	36	11.6645	gi|149053630|gb|EDM05447.1|	65.1	2.00E-22	rCG33581, isoform CRA_b [Rattus norvegicus]	sp|P97386|DNLI3_MOUSE	63.9	2.00E-21	DNA ligase 3 OS=Mus musculus GN=Lig3 PE=1 SV=1
Unigene10201_JingChaoZuZhi2	663	47	9.7619	gi|66730469|ref|NP_001019511.1|	67	1.00E-14	minichromosome maintenance complex component-like [Rattus norvegicus] >gi|81889844|sp|Q5XI14.1|CH045_RAT RecName: Full=Uncharacterized protein C8orf45 homolog	sp|Q5XI14|CH045_RAT	67	2.00E-15	Uncharacterized protein C8orf45 homolog OS=Rattus norvegicus PE=2 SV=1
Unigene10202_JingChaoZuZhi2	1575	124	10.8416	gi|158285858|ref|XP_564896.3|	186	8.00E-55	AGAP007327-PA [Anopheles gambiae str. PEST] >gi|157020191|gb|EAL41814.3| AGAP007327-PA [Anopheles gambiae str. PEST]	sp|P11536|E74EB_DROME	176	2.00E-51	Ecdysone-induced protein 74EF isoform B OS=Drosophila melanogaster GN=Eip74EF PE=2 SV=2
Unigene10203_JingChaoZuZhi2	301	20	9.1499	--	--	--	--	--	--	--	--
Unigene10204_JingChaoZuZhi2	304	17	7.7006	gi|148705020|gb|EDL36967.1|	44.3	9.00E-06	mCG148273 [Mus musculus]	--	--	--	--
Unigene10205_JingChaoZuZhi2	415	34	11.2819	--	--	--	--	--	--	--	--
Unigene10206_JingChaoZuZhi2	286	39	18.778	--	--	--	--	--	--	--	--
Unigene10207_JingChaoZuZhi2	271	26	13.2116	--	--	--	--	--	--	--	--
Unigene10208_JingChaoZuZhi2	334	9	3.7106	gi|195437785|ref|XP_002066820.1|	57	2.00E-07	GK24681 [Drosophila willistoni] >gi|194162905|gb|EDW77806.1| GK24681 [Drosophila willistoni]	sp|Q24523|BUN2_DROME	40.8	1.00E-06	Protein bunched, class 2/F isoform OS=Drosophila melanogaster GN=bun PE=1 SV=3
Unigene10209_JingChaoZuZhi2	533	26	6.7173	gi|110751273|ref|XP_392215.3|	104	2.00E-21	PREDICTED: similar to CG30069-PA [Apis mellifera]	--	--	--	--
Unigene1020_JingChaoZuZhi2	361	36	13.7324	--	--	--	--	--	--	--	--
Unigene10210_JingChaoZuZhi2	264	14	7.3026	--	--	--	--	--	--	--	--
Unigene10211_JingChaoZuZhi2	467	46	13.5642	--	--	--	--	--	--	--	--
Unigene10212_JingChaoZuZhi2	288	9	4.3033	--	--	--	--	--	--	--	--
Unigene10213_JingChaoZuZhi2	511	17	4.5812	gi|41023292|emb|CAA30395.2|	39.3	7.00E-06	salivary proline-rich protein [Homo sapiens]	sp|P21997|SSGP_VOLCA	49.7	1.00E-05	Sulfated surface glycoprotein 185 OS=Volvox carteri PE=1 SV=1
Unigene10214_JingChaoZuZhi2	444	53	16.4378	--	--	--	--	--	--	--	--
Unigene10215_JingChaoZuZhi2	276	4	1.9957	--	--	--	--	--	--	--	--
Unigene10216_JingChaoZuZhi2	530	117	30.3992	gi|189241035|ref|XP_971765.2|	169	6.00E-41	PREDICTED: similar to mrj CG8448-PA [Tribolium castaneum]	sp|Q6P642|DNJB6_XENTR	161	2.00E-39	DnaJ homolog subfamily B member 6 OS=Xenopus tropicalis GN=dnajb6 PE=2 SV=1
Unigene10217_JingChaoZuZhi2	1384	243	24.1781	gi|170048852|ref|XP_001870806.1|	450	1.00E-125	mitochondrial intermediate peptidase [Culex quinquefasciatus] >gi|167870805|gb|EDS34188.1| mitochondrial intermediate peptidase [Culex quinquefasciatus]	sp|Q99797|MIPEP_HUMAN	421	5.00E-117	Mitochondrial intermediate peptidase OS=Homo sapiens GN=MIPEP PE=1 SV=2
Unigene10218_JingChaoZuZhi2	833	133	21.9866	gi|48101370|ref|XP_395111.1|	172	1.00E-41	PREDICTED: similar to B-Ras CG1669-PA [Apis mellifera]	sp|Q6DGL2|KBRS2_DANRE	165	4.00E-40	NF-kappa-B inhibitor-interacting Ras-like protein 2 OS=Danio rerio GN=nkiras2 PE=2 SV=1
Unigene10219_JingChaoZuZhi2	409	17	5.7237	--	--	--	--	--	--	--	--
Unigene1021_JingChaoZuZhi2	225	43	26.3171	--	--	--	--	--	--	--	--
Unigene10220_JingChaoZuZhi2	754	87	15.8891	--	--	--	--	--	--	--	--
Unigene10221_JingChaoZuZhi2	655	42	8.83	gi|33086440|gb|AAP92532.1|	62	5.00E-14	Ab1-013 [Rattus norvegicus] >gi|149025437|gb|EDL81804.1| rCG63023 [Rattus norvegicus]	sp|Q1RMR2|RU17_BOVIN	62.8	2.00E-09	U1 small nuclear ribonucleoprotein 70 kDa OS=Bos taurus GN=SNRNP70 PE=2 SV=1
Unigene10222_JingChaoZuZhi2	513	16	4.2949	gi|156537964|ref|XP_001608178.1|	75.1	1.00E-12	PREDICTED: similar to munc13-4 [Nasonia vitripennis]	sp|Q9R189|UN13D_RAT	56.2	1.00E-07	Protein unc-13 homolog D OS=Rattus norvegicus GN=Unc13d PE=2 SV=1
Unigene10223_JingChaoZuZhi2	439	57	17.8798	gi|307204038|gb|EFN82942.1|	94.4	1.00E-18	Zinc finger protein Xfin [Harpegnathos saltator]	sp|Q54F38|H3V1_DICDI	89.7	5.00E-18	Histone H3.v1 OS=Dictyostelium discoideum GN=H3v1 PE=3 SV=1
Unigene10224_JingChaoZuZhi2	2077	490	32.4871	--	--	--	--	--	--	--	--
Unigene10225_JingChaoZuZhi2	847	294	47.7987	--	--	--	--	--	--	--	--
Unigene10226_JingChaoZuZhi2	425	44	14.2566	--	--	--	--	--	--	--	--
Unigene10227_JingChaoZuZhi2	300	45	20.6558	--	--	--	--	--	--	--	--
Unigene10228_JingChaoZuZhi2	487	47	13.2899	gi|167526714|ref|XP_001747690.1|	54.3	2.00E-06	hypothetical protein [Monosiga brevicollis MX1] >gi|163773794|gb|EDQ87430.1| predicted protein [Monosiga brevicollis MX1]	--	--	--	--
Unigene10229_JingChaoZuZhi2	333	14	5.7894	--	--	--	--	--	--	--	--
Unigene1022_JingChaoZuZhi2	647	136	28.9459	gi|117581974|gb|ABK41431.1|	64.3	3.00E-09	glutamic acid reigh protein-like protein [Trichinella spiralis]	sp|Q9SD39|PMTR_ARATH	58.2	5.00E-08	Probable methyltransferase PMT27 OS=Arabidopsis thaliana GN=At3g51070 PE=3 SV=1
Unigene10230_JingChaoZuZhi2	371	35	12.9911	--	--	--	--	--	--	--	--
Unigene10231_JingChaoZuZhi2	291	14	6.625	--	--	--	--	--	--	--	--
Unigene10232_JingChaoZuZhi2	272	6	3.0376	--	--	--	--	--	--	--	--
Unigene10233_JingChaoZuZhi2	435	30	9.4969	gi|62859111|ref|NP_001016197.1|	62.8	5.00E-15	sterile alpha motif domain containing 8 [Xenopus (Silurana) tropicalis] >gi|89268129|emb|CAJ81494.1| sterile alpha motif domain containing 8 [Xenopus tropicalis]	sp|Q9VS60|SMSR1_DROME	64.7	2.00E-10	Sphingomyelin synthase-related 1 OS=Drosophila melanogaster GN=SMSr PE=1 SV=2
Unigene10234_JingChaoZuZhi2	674	63	12.8716	--	--	--	--	--	--	--	--
Unigene10235_JingChaoZuZhi2	956	102	14.6924	gi|119627579|gb|EAX07174.1|	97.8	1.00E-23	hCG1793893 [Homo sapiens]	sp|Q84ZL0|FH5_ORYSJ	95.5	2.00E-21	Formin-like protein 5 OS=Oryza sativa subsp. japonica GN=FH5 PE=2 SV=2
Unigene10236_JingChaoZuZhi2	394	21	7.3396	gi|156914845|gb|AAI52662.1|	60.1	2.00E-08	Fam60al protein [Danio rerio] >gi|183986128|gb|AAI66080.1| LOC100158471 protein [Xenopus (Silurana) tropicalis]	sp|Q8C8M1|FA60A_MOUSE	57	4.00E-08	Protein FAM60A OS=Mus musculus GN=Fam60a PE=2 SV=1
Unigene10237_JingChaoZuZhi2	278	17	8.4208	--	--	--	--	--	--	--	--
Unigene10238_JingChaoZuZhi2	372	20	7.4035	gi|55925508|ref|NP_001007301.1|	78.6	2.00E-25	sodium/myo-inositol cotransporter 2 [Danio rerio] >gi|55250374|gb|AAH85631.1| Solute carrier family 5 (sodium/glucose cotransporter), member 11 [Danio rerio]	sp|Q8VDT1|SC5A9_MOUSE	69.7	3.00E-26	Sodium/glucose cotransporter 4 OS=Mus musculus GN=Slc5a9 PE=2 SV=3
Unigene10239_JingChaoZuZhi2	996	143	19.771	--	--	--	--	--	--	--	--
Unigene1023_JingChaoZuZhi2	1489	270	24.9701	gi|154344449|ref|XP_001568166.1|	188	4.00E-46	proteophosphoglycan ppg4 [Leishmania braziliensis MHOM/BR/75/M2904] >gi|134065503|emb|CAM43270.1| proteophosphoglycan ppg4 [Leishmania braziliensis]	sp|Q75JC9|Y8484_DICDI	178	1.00E-43	Uncharacterized protein DDB_G0271670 OS=Dictyostelium discoideum GN=DDB_G0271670 PE=4 SV=1
Unigene10240_JingChaoZuZhi2	504	50	13.6613	--	--	--	--	--	--	--	--
Unigene10241_JingChaoZuZhi2	275	37	18.5277	--	--	--	--	--	--	--	--
Unigene10242_JingChaoZuZhi2	371	41	15.2181	--	--	--	--	--	--	--	--
Unigene10243_JingChaoZuZhi2	638	45	9.7128	gi|66827745|ref|XP_647227.1|	53.5	5.00E-06	hypothetical protein DDB_G0268502 [Dictyostelium discoideum AX4] >gi|60475769|gb|EAL73704.1| hypothetical protein DDB_G0268502 [Dictyostelium discoideum AX4]	sp|P32334|MSB2_YEAST	51.6	4.00E-06	Protein MSB2 OS=Saccharomyces cerevisiae GN=MSB2 PE=1 SV=1
Unigene10244_JingChaoZuZhi2	873	74	11.6726	gi|156538669|ref|XP_001607739.1|	424	1.00E-117	PREDICTED: similar to ATP-dependent RNA and DNA helicase [Nasonia vitripennis]	sp|Q9VN03|SUV3_DROME	401	4.00E-111	ATP-dependent RNA helicase SUV3 homolog, mitochondrial OS=Drosophila melanogaster GN=CG9791 PE=1 SV=3
Unigene10245_JingChaoZuZhi2	435	35	11.0798	--	--	--	--	--	--	--	--
Unigene10246_JingChaoZuZhi2	320	18	7.7459	--	--	--	--	--	--	--	--
Unigene10247_JingChaoZuZhi2	382	40	14.4194	--	--	--	--	--	--	--	--
Unigene10248_JingChaoZuZhi2	342	16	6.4424	--	--	--	--	--	--	--	--
Unigene10249_JingChaoZuZhi2	363	18	6.8284	--	--	--	--	--	--	--	--
Unigene1024_JingChaoZuZhi2	319	25	10.792	gi|270003248|gb|EEZ99695.1|	54.3	1.00E-06	hypothetical protein TcasGA2_TC002455 [Tribolium castaneum]	--	--	--	--
Unigene10250_JingChaoZuZhi2	281	10	4.9006	gi|5921938|sp|P81578.1|CUPA4_CANPG	52.4	5.00E-06	RecName: Full=Cuticle protein AM1239; Short=CPAM1239	sp|P81578|CUPA4_CANPG	52.4	9.00E-07	Cuticle protein AM1239 OS=Cancer pagurus PE=1 SV=1
Unigene10251_JingChaoZuZhi2	352	17	6.6506	--	--	--	--	--	--	--	--
Unigene10252_JingChaoZuZhi2	329	18	7.534	gi|158284520|ref|XP_307262.4|	49.7	7.00E-10	AGAP004683-PA [Anopheles gambiae str. PEST] >gi|157021003|gb|EAA03201.4| AGAP004683-PA [Anopheles gambiae str. PEST]	--	--	--	--
Unigene10253_JingChaoZuZhi2	464	25	7.4195	--	--	--	--	--	--	--	--
Unigene10254_JingChaoZuZhi2	478	50	14.4044	--	--	--	--	--	--	--	--
Unigene10255_JingChaoZuZhi2	319	14	6.0435	--	--	--	--	--	--	--	--
Unigene10256_JingChaoZuZhi2	330	62	25.872	--	--	--	--	--	--	--	--
Unigene10257_JingChaoZuZhi2	1470	361	33.8175	--	--	--	--	--	--	--	--
Unigene10258_JingChaoZuZhi2	848	135	21.9225	gi|119605885|gb|EAW85479.1|	68.6	3.00E-10	serine/arginine repetitive matrix 2, isoform CRA_c [Homo sapiens]	sp|Q9UQ35|SRRM2_HUMAN	68.6	5.00E-11	Serine/arginine repetitive matrix protein 2 OS=Homo sapiens GN=SRRM2 PE=1 SV=2
Unigene10259_JingChaoZuZhi2	678	39	7.9211	gi|483321|gb|AAA20641.1|	342	1.00E-104	actin [Aplysia californica]	sp|P10984|ACT2_CAEEL	341	2.00E-104	Actin-2 OS=Caenorhabditis elegans GN=act-2 PE=2 SV=3
Unigene1025_JingChaoZuZhi2	851	183	29.6124	gi|268578395|ref|XP_002644180.1|	70.1	1.00E-10	Hypothetical protein CBG17156 [Caenorhabditis briggsae]	sp|Q9U7E0|ATRX_CAEEL	60.5	1.00E-08	Transcriptional regulator ATRX homolog OS=Caenorhabditis elegans GN=xnp-1 PE=1 SV=1
Unigene10260_JingChaoZuZhi2	483	72	20.5276	--	--	--	--	--	--	--	--
Unigene10261_JingChaoZuZhi2	472	61	17.7967	--	--	--	--	--	--	--	--
Unigene10262_JingChaoZuZhi2	494	55	15.3316	gi|24580684|ref|NP_608540.1|	100	2.00E-20	CG2839 [Drosophila melanogaster] >gi|22945532|gb|AAF51469.2| CG2839 [Drosophila melanogaster]	sp|A5E4P1|PXR1_LODEL	82.8	9.00E-16	Protein PXR1 OS=Lodderomyces elongisporus GN=PXR1 PE=3 SV=1
Unigene10263_JingChaoZuZhi2	399	27	9.3184	--	--	--	--	--	--	--	--
Unigene10264_JingChaoZuZhi2	259	8	4.2535	--	--	--	--	--	--	--	--
Unigene10265_JingChaoZuZhi2	329	25	10.464	--	--	--	--	--	--	--	--
Unigene10266_JingChaoZuZhi2	250	17	9.364	--	--	--	--	--	--	--	--
Unigene10267_JingChaoZuZhi2	723	66	12.5706	--	--	--	--	--	--	--	--
Unigene10268_JingChaoZuZhi2	355	66	25.6016	gi|156553685|ref|XP_001599809.1|	108	4.00E-23	PREDICTED: similar to esterase [Nasonia vitripennis]	sp|B2D0J5|EST6_APIME	102	7.00E-22	Venom carboxylesterase-6 OS=Apis mellifera PE=2 SV=1
Unigene10269_JingChaoZuZhi2	425	48	15.5526	--	--	--	--	--	--	--	--
Unigene1026_JingChaoZuZhi2	411	380	127.3191	gi|157104977|ref|XP_001648658.1|	70.9	1.00E-11	serine/threonine protein kinase [Aedes aegypti] >gi|108884150|gb|EAT48375.1| serine/threonine protein kinase [Aedes aegypti]	sp|B2RY56|RBM25_MOUSE	65.5	1.00E-10	RNA-binding protein 25 OS=Mus musculus GN=Rbm25 PE=1 SV=1
Unigene10270_JingChaoZuZhi2	404	29	9.8848	--	--	--	--	--	--	--	--
Unigene10271_JingChaoZuZhi2	440	30	9.389	--	--	--	--	--	--	--	--
Unigene10272_JingChaoZuZhi2	1207	255	29.0927	--	--	--	--	--	--	--	--
Unigene10273_JingChaoZuZhi2	268	13	6.6798	--	--	--	--	--	--	--	--
Unigene10274_JingChaoZuZhi2	378	39	14.2077	--	--	--	--	--	--	--	--
Unigene10275_JingChaoZuZhi2	2267	194	11.7843	gi|307204120|gb|EFN82989.1|	497	0	Neurogenic locus notch-like protein protein 1 [Harpegnathos saltator]	sp|Q99466|NOTC4_HUMAN	50.8	3.00E-14	Neurogenic locus notch homolog protein 4 OS=Homo sapiens GN=NOTCH4 PE=1 SV=2
Unigene10276_JingChaoZuZhi2	330	7	2.921	gi|307210798|gb|EFN87180.1|	47.8	3.00E-11	Innexin inx3 [Harpegnathos saltator]	sp|Q9VAS7|INX3_DROME	43.1	1.00E-10	Innexin inx3 OS=Drosophila melanogaster GN=inx3 PE=1 SV=1
Unigene10277_JingChaoZuZhi2	638	71	15.3246	gi|307191776|gb|EFN75218.1|	125	1.00E-27	Polycomb protein Scm [Harpegnathos saltator]	sp|Q9VHA0|SCM_DROME	85.1	3.00E-16	Polycomb protein Scm OS=Drosophila melanogaster GN=Scm PE=1 SV=2
Unigene10278_JingChaoZuZhi2	250	15	8.2623	gi|170576646|ref|XP_001893711.1|	60.5	2.00E-08	T-cell receptor beta chain ANA 11 [Brugia malayi]	sp|Q8MP30|Y7791_DICDI	50.8	3.00E-06	Uncharacterized histidine-rich protein DDB_G0274557 OS=Dictyostelium discoideum GN=DDB_G0274557 PE=4 SV=1
Unigene10279_JingChaoZuZhi2	1416	184	17.894	gi|189240845|ref|XP_001812763.1|	267	9.00E-70	PREDICTED: similar to adaptin, alpha/gamma/epsilon [Tribolium castaneum]	sp|O43747|AP1G1_HUMAN	229	3.00E-59	AP-1 complex subunit gamma-1 OS=Homo sapiens GN=AP1G1 PE=1 SV=5
Unigene1027_JingChaoZuZhi2	199	16	11.0718	--	--	--	--	--	--	--	--
Unigene10280_JingChaoZuZhi2	397	56	19.4245	--	--	--	--	--	--	--	--
Unigene10281_JingChaoZuZhi2	756	54	9.8361	--	--	--	--	--	--	--	--
Unigene10282_JingChaoZuZhi2	325	56	23.7277	--	--	--	--	--	--	--	--
Unigene10283_JingChaoZuZhi2	325	14	5.9319	--	--	--	--	--	--	--	--
Unigene10284_JingChaoZuZhi2	293	7	3.2899	gi|307197748|gb|EFN78897.1|	171	7.00E-42	Ryanodine receptor 44F [Harpegnathos saltator]	sp|Q24498|RY44_DROME	161	1.00E-39	Ryanodine receptor 44F OS=Drosophila melanogaster GN=Rya-r44F PE=1 SV=3
Unigene10285_JingChaoZuZhi2	372	28	10.3649	--	--	--	--	--	--	--	--
Unigene10286_JingChaoZuZhi2	621	65	14.4136	gi|170053966|ref|XP_001862914.1|	61.2	2.00E-08	semaphorin [Culex quinquefasciatus] >gi|167874384|gb|EDS37767.1| semaphorin [Culex quinquefasciatus]	sp|Q8IUL8|CILP2_HUMAN	58.2	4.00E-08	Cartilage intermediate layer protein 2 OS=Homo sapiens GN=CILP2 PE=2 SV=2
Unigene10287_JingChaoZuZhi2	502	45	12.3441	--	--	--	--	--	--	--	--
Unigene10288_JingChaoZuZhi2	320	31	13.3402	gi|198431401|ref|XP_002128736.1|	135	6.00E-31	PREDICTED: similar to GTP binding protein 3 [Ciona intestinalis]	sp|Q501Z5|GTPB3_DANRE	131	1.00E-30	tRNA modification GTPase GTPBP3, mitochondrial OS=Danio rerio GN=gtpbp3 PE=2 SV=1
Unigene10289_JingChaoZuZhi2	297	13	6.0275	--	--	--	--	--	--	--	--
Unigene1028_JingChaoZuZhi2	243	5	2.8334	gi|167521143|ref|XP_001744910.1|	52	6.00E-06	hypothetical protein [Monosiga brevicollis MX1] >gi|163776524|gb|EDQ90143.1| predicted protein [Monosiga brevicollis MX1]	--	--	--	--
Unigene10290_JingChaoZuZhi2	984	245	34.2865	gi|170576646|ref|XP_001893711.1|	90.1	1.00E-16	T-cell receptor beta chain ANA 11 [Brugia malayi]	sp|Q69566|U88_HHV6U	83.2	3.00E-15	Uncharacterized protein U88 OS=Human herpesvirus 6A (strain Uganda-1102) GN=U88 PE=4 SV=1
Unigene10291_JingChaoZuZhi2	749	52	9.5603	--	--	--	--	--	--	--	--
Unigene10292_JingChaoZuZhi2	256	39	20.9786	gi|51467974|ref|NP_001003864.1|	84	2.00E-15	ATP-dependent RNA helicase DDX51 [Danio rerio] >gi|82200454|sp|Q6DRI7.1|DDX51_DANRE RecName: Full=ATP-dependent RNA helicase DDX51; AltName: Full=DEAD box protein 51 >gi|49619011|gb|AAT68090.1| DEAD/H box 51 RNA helicase [Danio rerio]	sp|Q6DRI7|DDX51_DANRE	84	3.00E-16	ATP-dependent RNA helicase DDX51 OS=Danio rerio GN=ddx51 PE=2 SV=1
Unigene10293_JingChaoZuZhi2	247	9	5.0176	gi|148677652|gb|EDL09599.1|	55.1	8.00E-07	mCG147311 [Mus musculus]	sp|Q69566|U88_HHV6U	49.7	6.00E-06	Uncharacterized protein U88 OS=Human herpesvirus 6A (strain Uganda-1102) GN=U88 PE=4 SV=1
Unigene10294_JingChaoZuZhi2	664	102	21.1536	gi|74865845|sp|Q8MP30.1|Y7791_DICDI	82	2.00E-14	RecName: Full=Uncharacterized histidine-rich protein DDB_G0274557; Flags: Precursor	sp|Q8MP30|Y7791_DICDI	82	3.00E-15	Uncharacterized histidine-rich protein DDB_G0274557 OS=Dictyostelium discoideum GN=DDB_G0274557 PE=4 SV=1
Unigene10295_JingChaoZuZhi2	265	13	6.7554	--	--	--	--	--	--	--	--
Unigene10296_JingChaoZuZhi2	276	41	20.4563	--	--	--	--	--	--	--	--
Unigene10297_JingChaoZuZhi2	1091	92	11.6122	--	--	--	--	--	--	--	--
Unigene10298_JingChaoZuZhi2	558	49	12.0924	--	--	--	--	--	--	--	--
Unigene10299_JingChaoZuZhi2	406	37	12.5495	--	--	--	--	--	--	--	--
Unigene1029_JingChaoZuZhi2	284	50	24.244	--	--	--	--	--	--	--	--
Unigene102_JingChaoZuZhi2	781	50	8.816	gi|307209185|gb|EFN86296.1|	55.5	2.00E-06	hypothetical protein EAI_03492 [Harpegnathos saltator]	--	--	--	--
Unigene10300_JingChaoZuZhi2	440	19	5.9464	gi|91094477|ref|XP_970702.1|	98.2	8.00E-20	PREDICTED: similar to anaphase promoting complex subunit 4 [Tribolium castaneum]	--	--	--	--
Unigene10301_JingChaoZuZhi2	258	11	5.8712	--	--	--	--	--	--	--	--
Unigene10302_JingChaoZuZhi2	272	7	3.5439	gi|1708251|sp|P54960.1|HMDH_BLAGE	116	2.00E-25	RecName: Full=3-hydroxy-3-methylglutaryl-coenzyme A reductase; Short=HMG-CoA reductase >gi|1655537|emb|CAA49628.1| hydroxymethylglutaryl-CoA reductase (NADPH) [Blattella germanica]	sp|P54960|HMDH_BLAGE	116	4.00E-26	3-hydroxy-3-methylglutaryl-coenzyme A reductase OS=Blattella germanica PE=2 SV=1
Unigene10303_JingChaoZuZhi2	422	29	9.4632	--	--	--	--	--	--	--	--
Unigene10304_JingChaoZuZhi2	330	26	10.8495	--	--	--	--	--	--	--	--
Unigene10305_JingChaoZuZhi2	336	33	13.5247	gi|118490648|ref|XP_001238633.1|	54.7	1.00E-06	hypothetical protein, conserved [Eimeria tenella] >gi|109238416|emb|CAK51380.1| hypothetical protein, conserved [Eimeria tenella]	sp|A5E4P1|PXR1_LODEL	51.2	2.00E-06	Protein PXR1 OS=Lodderomyces elongisporus GN=PXR1 PE=3 SV=1
Unigene10306_JingChaoZuZhi2	295	24	11.2032	--	--	--	--	--	--	--	--
Unigene10307_JingChaoZuZhi2	620	84	18.6569	--	--	--	--	--	--	--	--
Unigene10308_JingChaoZuZhi2	273	13	6.5574	--	--	--	--	--	--	--	--
Unigene10309_JingChaoZuZhi2	2159	296	18.8795	gi|12056971|ref|NP_073153.1|	387	1.00E-105	anaphase-promoting complex subunit 1 [Homo sapiens] >gi|37537845|sp|Q9H1A4.1|APC1_HUMAN RecName: Full=Anaphase-promoting complex subunit 1; Short=APC1; AltName: Full=Cyclosome subunit 1; AltName: Full=Mitotic checkpoint regulator; AltName: Full=Testis-specific gene 24 protein >gi|11967711|emb|CAC19484.1| Tsg24 protein [Homo sapiens] >gi|85397406|gb|AAI04903.1| Anaphase promoting complex subunit 1…	sp|Q9H1A4|APC1_HUMAN	387	2.00E-106	Anaphase-promoting complex subunit 1 OS=Homo sapiens GN=ANAPC1 PE=1 SV=1
Unigene1030_JingChaoZuZhi2	694	84	16.6675	gi|301623410|ref|XP_002941008.1|	73.9	5.00E-12	PREDICTED: zinc finger CCCH domain-containing protein 13 [Xenopus (Silurana) tropicalis]	sp|Q06666|T2_MOUSE	69.3	2.00E-11	Octapeptide-repeat protein T2 OS=Mus musculus GN=Srst PE=2 SV=1
Unigene10310_JingChaoZuZhi2	1643	596	49.9529	gi|91077430|ref|XP_966364.1|	959	0	PREDICTED: similar to ATP-dependent RNA helicase [Tribolium castaneum]	sp|O22899|DHX15_ARATH	779	0	Probable pre-mRNA-splicing factor ATP-dependent RNA helicase OS=Arabidopsis thaliana GN=At2g47250 PE=2 SV=1
Unigene10311_JingChaoZuZhi2	499	74	20.4213	--	--	--	--	--	--	--	--
Unigene10312_JingChaoZuZhi2	687	35	7.0156	gi|291235708|ref|XP_002737786.1|	74.7	3.00E-12	PREDICTED: ATP-binding cassette, sub-family A, member 4-like [Saccoglossus kowalevskii]	--	--	--	--
Unigene10313_JingChaoZuZhi2	915	88	13.2438	gi|307207075|gb|EFN84884.1|	87.4	8.00E-24	Protein diaphanous [Harpegnathos saltator]	sp|Q9T0K5|LRX3_ARATH	83.6	5.00E-22	Leucine-rich repeat extensin-like protein 3 OS=Arabidopsis thaliana GN=LRX3 PE=1 SV=1
Unigene10314_JingChaoZuZhi2	427	28	9.0299	--	--	--	--	--	--	--	--
Unigene10315_JingChaoZuZhi2	1151	183	21.8941	gi|91079260|ref|XP_971902.1|	90.9	4.00E-24	PREDICTED: similar to AGAP005012-PA [Tribolium castaneum]	sp|Q01415|GALK2_HUMAN	63.9	6.00E-17	N-acetylgalactosamine kinase OS=Homo sapiens GN=GALK2 PE=1 SV=1
Unigene10316_JingChaoZuZhi2	400	15	5.164	gi|110761750|ref|XP_623872.2|	44.3	4.00E-10	PREDICTED: similar to CG7082-PC, isoform C isoform 2 [Apis mellifera]	sp|Q9Y2W6|TDRKH_HUMAN	39.7	1.00E-08	Tudor and KH domain-containing protein OS=Homo sapiens GN=TDRKH PE=1 SV=1
Unigene10317_JingChaoZuZhi2	566	50	12.1648	--	--	--	--	--	--	--	--
Unigene10318_JingChaoZuZhi2	307	22	9.8682	gi|156549330|ref|XP_001601074.1|	111	9.00E-24	PREDICTED: similar to conventional protein kinase C [Nasonia vitripennis]	sp|Q25378|KPC1_LYTPI	89	8.00E-18	Protein kinase C OS=Lytechinus pictus GN=PKC1 PE=2 SV=1
Unigene10319_JingChaoZuZhi2	306	8	3.6001	--	--	--	--	--	--	--	--
Unigene1031_JingChaoZuZhi2	237	39	22.6604	--	--	--	--	--	--	--	--
Unigene10320_JingChaoZuZhi2	932	170	25.118	gi|194207288|ref|XP_001490999.2|	231	3.00E-59	PREDICTED: similar to C04F5.8 [Equus caballus]	sp|P98088|MUC5A_HUMAN	61.2	1.00E-08	Mucin-5AC (Fragments) OS=Homo sapiens GN=MUC5AC PE=1 SV=3
Unigene10321_JingChaoZuZhi2	292	8	3.7728	--	--	--	--	--	--	--	--
Unigene10322_JingChaoZuZhi2	446	39	12.0415	--	--	--	--	--	--	--	--
Unigene10323_JingChaoZuZhi2	263	7	3.6652	--	--	--	--	--	--	--	--
Unigene10324_JingChaoZuZhi2	384	73	26.1784	--	--	--	--	--	--	--	--
Unigene10325_JingChaoZuZhi2	256	9	4.8412	--	--	--	--	--	--	--	--
Unigene10326_JingChaoZuZhi2	276	7	3.4925	gi|296490675|gb|DAA32788.1|	51.6	8.00E-06	low-density lipoprotein receptor-related protein 2-like [Bos taurus]	sp|Q9NZR2|LRP1B_HUMAN	49.3	7.00E-06	Low-density lipoprotein receptor-related protein 1B OS=Homo sapiens GN=LRP1B PE=1 SV=2
Unigene10327_JingChaoZuZhi2	1265	391	42.5636	--	--	--	--	--	--	--	--
Unigene10328_JingChaoZuZhi2	1584	331	28.7756	gi|198471785|ref|XP_002133841.1|	99.8	3.00E-19	GA23104 [Drosophila pseudoobscura pseudoobscura] >gi|198146078|gb|EDY72468.1| GA23104 [Drosophila pseudoobscura pseudoobscura]	sp|P40631|MLH_TETTH	99.4	7.00E-20	Micronuclear linker histone polyprotein OS=Tetrahymena thermophila GN=MLH PE=1 SV=2
Unigene10329_JingChaoZuZhi2	1045	136	17.9215	--	--	--	--	--	--	--	--
Unigene1032_JingChaoZuZhi2	689	132	26.3819	gi|194742750|ref|XP_001953864.1|	108	4.00E-31	GF17980 [Drosophila ananassae] >gi|190626901|gb|EDV42425.1| GF17980 [Drosophila ananassae]	sp|Q1L9A2|OPA3_DANRE	90.9	2.00E-22	Optic atrophy 3 protein homolog OS=Danio rerio GN=opa3 PE=2 SV=1
Unigene10330_JingChaoZuZhi2	255	13	7.0203	--	--	--	--	--	--	--	--
Unigene10331_JingChaoZuZhi2	340	43	17.4157	--	--	--	--	--	--	--	--
Unigene10332_JingChaoZuZhi2	302	28	12.7674	gi|119627579|gb|EAX07174.1|	75.9	4.00E-13	hCG1793893 [Homo sapiens]	sp|Q0GNC1|INF2_MOUSE	65.5	1.00E-10	Inverted formin-2 OS=Mus musculus GN=Inf2 PE=1 SV=1
Unigene10333_JingChaoZuZhi2	353	31	12.0931	gi|32699197|gb|AAF60512.2|	53.5	2.00E-06	Hypothetical protein Y39A3B.1 [Caenorhabditis elegans]	--	--	--	--
Unigene10334_JingChaoZuZhi2	436	119	37.5848	--	--	--	--	--	--	--	--
Unigene10335_JingChaoZuZhi2	599	73	16.7822	--	--	--	--	--	--	--	--
Unigene10336_JingChaoZuZhi2	292	27	12.7331	--	--	--	--	--	--	--	--
Unigene10337_JingChaoZuZhi2	354	31	12.059	gi|37654240|gb|AAQ96225.1|	65.1	7.00E-10	LRRGT00012 [Rattus norvegicus] >gi|149047838|gb|EDM00454.1| LRRGT00012 [Rattus norvegicus]	sp|Q869E1|DNLI1_DICDI	58.5	1.00E-08	DNA ligase 1 OS=Dictyostelium discoideum GN=lig1 PE=3 SV=1
Unigene10338_JingChaoZuZhi2	404	61	20.7922	--	--	--	--	--	--	--	--
Unigene10339_JingChaoZuZhi2	2177	252	15.9402	gi|291045152|dbj|BAI82363.1|	704	0	ribosomal protein S6 kinase [Haemaphysalis longicornis]	sp|Q5F3L1|KS6A5_CHICK	655	0	Ribosomal protein S6 kinase alpha-5 OS=Gallus gallus GN=RPS6KA5 PE=2 SV=1
Unigene1033_JingChaoZuZhi2	265	26	13.5107	gi|123503773|ref|XP_001328596.1|	56.6	3.00E-07	exosome complex exonuclease [Trichomonas vaginalis G3]	sp|Q8WML3|MYST4_MACFA	51.2	2.00E-06	Histone acetyltransferase MYST4 OS=Macaca fascicularis GN=MYST4 PE=2 SV=1
Unigene10340_JingChaoZuZhi2	452	28	8.5304	gi|66517310|ref|XP_625037.1|	163	6.00E-53	PREDICTED: similar to DNA-directed RNA polymerase III subunit 127.6 kDa polypeptide (RNA polymerase III subunit 2) (RPC2) isoform 1 [Apis mellifera]	sp|P59470|RPC2_MOUSE	142	1.00E-47	DNA-directed RNA polymerase III subunit RPC2 OS=Mus musculus GN=Polr3b PE=2 SV=2
Unigene10341_JingChaoZuZhi2	507	46	12.494	gi|301623410|ref|XP_002941008.1|	77.4	2.00E-13	PREDICTED: zinc finger CCCH domain-containing protein 13 [Xenopus (Silurana) tropicalis]	sp|P49756|RBM25_HUMAN	73.2	8.00E-13	RNA-binding protein 25 OS=Homo sapiens GN=RBM25 PE=1 SV=3
Unigene10342_JingChaoZuZhi2	384	22	7.8894	--	--	--	--	--	--	--	--
Unigene10343_JingChaoZuZhi2	505	52	14.1796	--	--	--	--	--	--	--	--
Unigene10344_JingChaoZuZhi2	1293	297	31.6308	gi|125775237|ref|XP_001358870.1|	567	1.00E-175	GA18890 [Drosophila pseudoobscura pseudoobscura] >gi|195144772|ref|XP_002013370.1| GL24105 [Drosophila persimilis] >gi|54638611|gb|EAL28013.1| GA18890 [Drosophila pseudoobscura pseudoobscura] >gi|194102313|gb|EDW24356.1| GL24105 [Drosophila persimilis]	sp|Q5ZME8|SMU1_CHICK	593	7.00E-169	WD40 repeat-containing protein SMU1 OS=Gallus gallus GN=SMU1 PE=2 SV=1
Unigene10345_JingChaoZuZhi2	412	53	17.7146	--	--	--	--	--	--	--	--
Unigene10346_JingChaoZuZhi2	296	42	19.5393	--	--	--	--	--	--	--	--
Unigene10347_JingChaoZuZhi2	585	52	12.2405	gi|195383522|ref|XP_002050475.1|	96.3	6.00E-19	GJ20184 [Drosophila virilis] >gi|194145272|gb|EDW61668.1| GJ20184 [Drosophila virilis]	sp|Q75JC9|Y8484_DICDI	79	2.00E-14	Uncharacterized protein DDB_G0271670 OS=Dictyostelium discoideum GN=DDB_G0271670 PE=4 SV=1
Unigene10348_JingChaoZuZhi2	343	36	14.4531	--	--	--	--	--	--	--	--
Unigene10349_JingChaoZuZhi2	327	5	2.1056	--	--	--	--	--	--	--	--
Unigene1034_JingChaoZuZhi2	269	11	5.6311	--	--	--	--	--	--	--	--
Unigene10350_JingChaoZuZhi2	339	45	18.2795	gi|74865845|sp|Q8MP30.1|Y7791_DICDI	78.6	6.00E-14	RecName: Full=Uncharacterized histidine-rich protein DDB_G0274557; Flags: Precursor	sp|Q8MP30|Y7791_DICDI	78.6	1.00E-14	Uncharacterized histidine-rich protein DDB_G0274557 OS=Dictyostelium discoideum GN=DDB_G0274557 PE=4 SV=1
Unigene10351_JingChaoZuZhi2	765	97	17.4607	gi|193618067|ref|XP_001951888.1|	214	3.00E-54	PREDICTED: similar to tyrosine phosphatase, non-receptor type nt6 [Acyrthosiphon pisum]	sp|Q62130|PTN14_MOUSE	203	1.00E-51	Tyrosine-protein phosphatase non-receptor type 14 OS=Mus musculus GN=Ptpn14 PE=1 SV=1
Unigene10352_JingChaoZuZhi2	319	10	4.3168	--	--	--	--	--	--	--	--
Unigene10353_JingChaoZuZhi2	367	37	13.8831	gi|195131785|ref|XP_002010326.1|	61.2	1.00E-08	GI15861 [Drosophila mojavensis] >gi|193908776|gb|EDW07643.1| GI15861 [Drosophila mojavensis]	sp|Q869E1|DNLI1_DICDI	53.1	5.00E-07	DNA ligase 1 OS=Dictyostelium discoideum GN=lig1 PE=3 SV=1
Unigene10354_JingChaoZuZhi2	396	52	18.0826	--	--	--	--	--	--	--	--
Unigene10355_JingChaoZuZhi2	338	12	4.889	gi|57901141|gb|AAW57890.1|	110	3.00E-39	hemocyanin subunit 2 [Metacarcinus magister]	sp|P80888|HCY_PALVU	66.2	1.00E-17	Hemocyanin OS=Palinurus vulgaris PE=1 SV=2
Unigene10356_JingChaoZuZhi2	265	20	10.3929	--	--	--	--	--	--	--	--
Unigene10357_JingChaoZuZhi2	1491	243	22.443	gi|224081967|ref|XP_002194853.1|	707	0	PREDICTED: similar to amine oxidase (flavin containing) domain 2 [Taeniopygia guttata]	sp|Q6ZQ88|KDM1A_MOUSE	706	0	Lysine-specific histone demethylase 1A OS=Mus musculus GN=Kdm1a PE=1 SV=2
Unigene10358_JingChaoZuZhi2	1341	225	23.105	--	--	--	--	--	--	--	--
Unigene10359_JingChaoZuZhi2	291	10	4.7322	--	--	--	--	--	--	--	--
Unigene1035_JingChaoZuZhi2	490	56	15.7378	--	--	--	--	--	--	--	--
Unigene10360_JingChaoZuZhi2	288	8	3.8252	--	--	--	--	--	--	--	--
Unigene10361_JingChaoZuZhi2	420	80	26.2296	gi|156546314|ref|XP_001606269.1|	197	7.00E-50	PREDICTED: similar to Dnajc10 protein [Nasonia vitripennis]	sp|Q6NRT6|DJC10_XENLA	174	2.00E-43	DnaJ homolog subfamily C member 10 OS=Xenopus laevis GN=dnajc10 PE=2 SV=1
Unigene10362_JingChaoZuZhi2	780	136	24.0102	gi|154344451|ref|XP_001568167.1|	68.2	3.00E-10	proteophosphoglycan ppg4 [Leishmania braziliensis MHOM/BR/75/M2904] >gi|134065504|emb|CAM43271.1| proteophosphoglycan ppg4 [Leishmania braziliensis]	sp|P41073|PEP_DROME	61.2	7.00E-09	Zinc finger protein on ecdysone puffs OS=Drosophila melanogaster GN=Pep PE=1 SV=1
Unigene10363_JingChaoZuZhi2	1018	88	11.9038	gi|156551776|ref|XP_001602698.1|	374	1.00E-141	PREDICTED: similar to neurofibromin [Nasonia vitripennis]	sp|Q04690|NF1_MOUSE	288	1.00E-112	Neurofibromin OS=Mus musculus GN=Nf1 PE=1 SV=1
Unigene10364_JingChaoZuZhi2	1499	165	15.1577	gi|193641102|ref|XP_001950093.1|	476	1.00E-160	PREDICTED: similar to cullin [Acyrthosiphon pisum]	sp|Q5RB36|CUL5_PONAB	437	9.00E-147	Cullin-5 OS=Pongo abelii GN=CUL5 PE=2 SV=3
Unigene10365_JingChaoZuZhi2	743	92	17.051	gi|307173524|gb|EFN64434.1|	229	7.00E-59	Myosin-IXa [Camponotus floridanus]	sp|Q8C170|MYO9A_MOUSE	163	1.00E-39	Myosin-IXa OS=Mus musculus GN=Myo9a PE=1 SV=2
Unigene10366_JingChaoZuZhi2	389	22	7.788	--	--	--	--	--	--	--	--
Unigene10367_JingChaoZuZhi2	317	9	3.9096	--	--	--	--	--	--	--	--
Unigene10368_JingChaoZuZhi2	788	129	22.5432	gi|194222631|ref|XP_001915718.1|	73.9	6.00E-12	PREDICTED: similar to YEATS domain containing 2 [Equus caballus]	sp|Q02817|MUC2_HUMAN	70.5	1.00E-11	Mucin-2 OS=Homo sapiens GN=MUC2 PE=1 SV=2
Unigene10369_JingChaoZuZhi2	602	68	15.5548	--	--	--	--	--	--	--	--
Unigene1036_JingChaoZuZhi2	238	5	2.893	--	--	--	--	--	--	--	--
Unigene10370_JingChaoZuZhi2	2836	514	24.9579	gi|110756847|ref|XP_392373.3|	1261	0	PREDICTED: similar to transportin 1 [Apis mellifera]	sp|Q92973|TNPO1_HUMAN	1217	0	Transportin-1 OS=Homo sapiens GN=TNPO1 PE=1 SV=2
Unigene10371_JingChaoZuZhi2	318	24	10.3929	--	--	--	--	--	--	--	--
Unigene10372_JingChaoZuZhi2	278	14	6.9348	--	--	--	--	--	--	--	--
Unigene10373_JingChaoZuZhi2	501	77	21.1643	--	--	--	--	--	--	--	--
Unigene10374_JingChaoZuZhi2	255	29	15.6606	--	--	--	--	--	--	--	--
Unigene10375_JingChaoZuZhi2	496	58	16.1027	--	--	--	--	--	--	--	--
Unigene10376_JingChaoZuZhi2	305	23	10.3844	--	--	--	--	--	--	--	--
Unigene10377_JingChaoZuZhi2	301	12	5.4899	--	--	--	--	--	--	--	--
Unigene10378_JingChaoZuZhi2	501	33	9.0704	gi|156548342|ref|XP_001603387.1|	172	2.00E-55	PREDICTED: similar to CG3297-PB [Nasonia vitripennis]	sp|Q9N1Q4|LAT2_RABIT	148	2.00E-41	Large neutral amino acids transporter small subunit 2 OS=Oryctolagus cuniculus GN=SLC7A8 PE=1 SV=1
Unigene10379_JingChaoZuZhi2	312	34	15.0064	--	--	--	--	--	--	--	--
Unigene1037_JingChaoZuZhi2	1998	275	18.9535	gi|74007211|ref|XP_537985.2|	151	8.00E-35	PREDICTED: similar to DNA polymerase alpha catalytic subunit [Canis familiaris]	sp|P09884|DPOLA_HUMAN	142	9.00E-33	DNA polymerase alpha catalytic subunit OS=Homo sapiens GN=POLA1 PE=1 SV=2
Unigene10380_JingChaoZuZhi2	1360	190	19.2383	gi|189235658|ref|XP_969896.2|	523	1.00E-147	PREDICTED: similar to rolling pebbles [Tribolium castaneum]	sp|Q9HCD6|TANC2_HUMAN	378	6.00E-104	Protein TANC2 OS=Homo sapiens GN=TANC2 PE=1 SV=3
Unigene10381_JingChaoZuZhi2	366	44	16.5548	gi|5921939|sp|P81579.1|CUPA5_CANPG	46.6	8.00E-09	RecName: Full=Cuticle protein AM1274; Short=CPAM1274	sp|P81579|CUPA5_CANPG	46.6	1.00E-09	Cuticle protein AM1274 OS=Cancer pagurus PE=1 SV=1
Unigene10382_JingChaoZuZhi2	287	15	7.1972	--	--	--	--	--	--	--	--
Unigene10383_JingChaoZuZhi2	491	26	7.2919	gi|195116371|ref|XP_002002729.1|	120	7.00E-44	GI11283 [Drosophila mojavensis] >gi|193913304|gb|EDW12171.1| GI11283 [Drosophila mojavensis]	sp|Q8BSS9|LIPA2_MOUSE	82	4.00E-28	Liprin-alpha-2 OS=Mus musculus GN=Ppfia2 PE=1 SV=2
Unigene10384_JingChaoZuZhi2	471	34	9.9405	gi|307170766|gb|EFN62891.1|	149	4.00E-35	Glyoxylate/hydroxypyruvate reductase A [Camponotus floridanus]	sp|Q32HN5|GHRA_SHIDS	108	2.00E-23	Glyoxylate/hydroxypyruvate reductase A OS=Shigella dysenteriae serotype 1 (strain Sd197) GN=ghrA PE=3 SV=2
Unigene10385_JingChaoZuZhi2	276	5	2.4947	--	--	--	--	--	--	--	--
Unigene10386_JingChaoZuZhi2	263	17	8.9011	--	--	--	--	--	--	--	--
Unigene10387_JingChaoZuZhi2	913	143	21.5684	gi|74957125|sp|O16796.2|NEPL2_CAEEL	98.2	4.00E-19	RecName: Full=Neprilysin-2	sp|O16796|NEPL2_CAEEL	98.2	7.00E-20	Neprilysin-2 OS=Caenorhabditis elegans GN=nep-2 PE=1 SV=2
Unigene10388_JingChaoZuZhi2	408	65	21.9384	--	--	--	--	--	--	--	--
Unigene10389_JingChaoZuZhi2	424	42	13.6407	--	--	--	--	--	--	--	--
Unigene1038_JingChaoZuZhi2	933	275	40.5885	--	--	--	--	--	--	--	--
Unigene10390_JingChaoZuZhi2	434	16	5.0767	--	--	--	--	--	--	--	--
Unigene10391_JingChaoZuZhi2	261	5	2.638	--	--	--	--	--	--	--	--
Unigene10392_JingChaoZuZhi2	283	6	2.9196	gi|91090776|ref|XP_969654.1|	52.4	5.00E-06	PREDICTED: similar to NMDA-type glutamate receptor 1 [Tribolium castaneum]	--	--	--	--
Unigene10393_JingChaoZuZhi2	379	101	36.6973	--	--	--	--	--	--	--	--
Unigene10394_JingChaoZuZhi2	731	71	13.375	gi|159570532|emb|CAP19396.1|	62.8	7.00E-16	aminomethyltransferase [Danio rerio] >gi|159570761|emb|CAP19587.1| aminomethyltransferase [Danio rerio]	sp|P48728|GCST_HUMAN	63.5	2.00E-16	Aminomethyltransferase, mitochondrial OS=Homo sapiens GN=AMT PE=1 SV=1
Unigene10395_JingChaoZuZhi2	939	325	47.6617	gi|91088839|ref|XP_970745.1|	134	6.00E-30	PREDICTED: similar to lark CG8597-PA [Tribolium castaneum]	sp|Q94901|LARK_DROME	123	2.00E-27	RNA-binding protein lark OS=Drosophila melanogaster GN=lark PE=1 SV=1
Unigene10396_JingChaoZuZhi2	315	18	7.8689	gi|241626004|ref|XP_002407854.1|	68.6	6.00E-11	conserved hypothetical protein [Ixodes scapularis] >gi|215501066|gb|EEC10560.1| conserved hypothetical protein [Ixodes scapularis]	--	--	--	--
Unigene10397_JingChaoZuZhi2	479	24	6.8997	--	--	--	--	--	--	--	--
Unigene10398_JingChaoZuZhi2	302	20	9.1196	--	--	--	--	--	--	--	--
Unigene10399_JingChaoZuZhi2	270	14	7.1403	--	--	--	--	--	--	--	--
Unigene1039_JingChaoZuZhi2	219	14	8.8031	--	--	--	--	--	--	--	--
Unigene103_JingChaoZuZhi2	1261	350	38.2212	gi|347227|gb|AAA49027.1|	109	6.00E-75	reverse transcriptase [Gallus gallus]	sp|P08548|LIN1_NYCCO	62.4	1.00E-16	LINE-1 reverse transcriptase homolog OS=Nycticebus coucang PE=1 SV=1
Unigene10400_JingChaoZuZhi2	870	122	19.3104	--	--	--	--	--	--	--	--
Unigene10401_JingChaoZuZhi2	521	33	8.7222	gi|268557034|ref|XP_002636506.1|	60.5	3.00E-08	Hypothetical protein CBG23181 [Caenorhabditis briggsae]	sp|A5E4P1|PXR1_LODEL	56.6	8.00E-08	Protein PXR1 OS=Lodderomyces elongisporus GN=PXR1 PE=3 SV=1
Unigene10402_JingChaoZuZhi2	286	17	8.1853	--	--	--	--	--	--	--	--
Unigene10403_JingChaoZuZhi2	723	58	11.0469	gi|170042848|ref|XP_001849123.1|	359	5.00E-98	activating signal cointegrator 1 complex subunit 3 [Culex quinquefasciatus] >gi|167866280|gb|EDS29663.1| activating signal cointegrator 1 complex subunit 3 [Culex quinquefasciatus]	sp|Q8N3C0|HELC1_HUMAN	323	7.00E-88	Activating signal cointegrator 1 complex subunit 3 OS=Homo sapiens GN=ASCC3 PE=1 SV=3
Unigene10404_JingChaoZuZhi2	404	38	12.9525	--	--	--	--	--	--	--	--
Unigene10405_JingChaoZuZhi2	309	28	12.4782	gi|115735314|ref|XP_001200346.1|	52.4	5.00E-06	PREDICTED: hypothetical protein [Strongylocentrotus purpuratus] >gi|115964189|ref|XP_001182773.1| PREDICTED: hypothetical protein [Strongylocentrotus purpuratus]	--	--	--	--
Unigene10406_JingChaoZuZhi2	269	17	8.7026	--	--	--	--	--	--	--	--
Unigene10407_JingChaoZuZhi2	1136	274	33.2142	gi|114664951|ref|XP_001168849.1|	58.2	6.00E-07	PREDICTED: similar to DKFZp547E087 protein [Pan troglodytes]	sp|A5GVG4|IF2_SYNR3	57	2.00E-07	Translation initiation factor IF-2 OS=Synechococcus sp. (strain RCC307) GN=infB PE=3 SV=1
Unigene10408_JingChaoZuZhi2	341	45	18.1723	--	--	--	--	--	--	--	--
Unigene10409_JingChaoZuZhi2	538	94	24.0601	--	--	--	--	--	--	--	--
Unigene1040_JingChaoZuZhi2	317	54	23.4577	--	--	--	--	--	--	--	--
Unigene10410_JingChaoZuZhi2	1239	181	20.1168	gi|193613062|ref|XP_001942636.1|	77.4	1.00E-12	PREDICTED: similar to ubiquitin specific protease 48 [Acyrthosiphon pisum]	sp|Q76LT8|UBP48_RAT	75.5	7.00E-13	Ubiquitin carboxyl-terminal hydrolase 48 OS=Rattus norvegicus GN=Usp48 PE=1 SV=1
Unigene10411_JingChaoZuZhi2	272	23	11.6442	gi|194856137|ref|XP_001968684.1|	65.1	7.00E-10	GG25008 [Drosophila erecta] >gi|190660551|gb|EDV57743.1| GG25008 [Drosophila erecta]	sp|Q9P2Y4|ZN219_HUMAN	60.1	4.00E-09	Zinc finger protein 219 OS=Homo sapiens GN=ZNF219 PE=1 SV=2
Unigene10412_JingChaoZuZhi2	471	41	11.9871	--	--	--	--	--	--	--	--
Unigene10413_JingChaoZuZhi2	727	92	17.4263	gi|307201771|gb|EFN81444.1|	260	4.00E-68	RING finger protein 157 [Harpegnathos saltator]	sp|Q6INH1|RN157_XENLA	216	9.00E-56	RING finger protein 157 OS=Xenopus laevis GN=rnf157 PE=2 SV=1
Unigene10414_JingChaoZuZhi2	495	54	15.0224	gi|296208411|ref|XP_002751094.1|	67.4	2.00E-10	PREDICTED: epithelial chloride channel protein-like [Callithrix jacchus]	sp|Q6Q473|CLCA4_MOUSE	61.2	2.00E-09	Calcium-activated chloride channel regulator 4 OS=Mus musculus GN=Clca4 PE=1 SV=2
Unigene10415_JingChaoZuZhi2	331	8	3.3282	--	--	--	--	--	--	--	--
Unigene10416_JingChaoZuZhi2	384	8	2.8689	gi|118088160|ref|XP_001235548.1|	30.4	9.00E-07	PREDICTED: similar to formin 2 [Gallus gallus]	--	--	--	--
Unigene10417_JingChaoZuZhi2	314	11	4.8241	gi|270006362|gb|EFA02810.1|	109	3.00E-23	dachsous [Tribolium castaneum]	sp|Q24292|DS_DROME	95.9	7.00E-20	Protein dachsous OS=Drosophila melanogaster GN=ds PE=1 SV=3
Unigene10418_JingChaoZuZhi2	307	11	4.9341	gi|170571951|ref|XP_001891929.1|	55.1	7.00E-07	Late embryogenesis abundant protein B19.4 [Brugia malayi]	--	--	--	--
Unigene10419_JingChaoZuZhi2	331	12	4.9923	--	--	--	--	--	--	--	--
Unigene1041_JingChaoZuZhi2	281	16	7.8409	gi|268560452|ref|XP_002646214.1|	64.7	1.00E-09	Hypothetical protein CBG04381 [Caenorhabditis briggsae]	sp|Q5T200|ZC3HD_HUMAN	53.9	3.00E-07	Zinc finger CCCH domain-containing protein 13 OS=Homo sapiens GN=ZC3H13 PE=1 SV=1
Unigene10420_JingChaoZuZhi2	319	17	7.3385	gi|72088775|ref|XP_796133.1|	55.1	8.00E-07	PREDICTED: similar to GA12850-PA [Strongylocentrotus purpuratus] >gi|115708992|ref|XP_001201516.1| PREDICTED: similar to GA12850-PA [Strongylocentrotus purpuratus]	--	--	--	--
Unigene10421_JingChaoZuZhi2	264	15	7.8242	--	--	--	--	--	--	--	--
Unigene10422_JingChaoZuZhi2	1061	75	9.7341	gi|270004907|gb|EFA01355.1|	520	1.00E-146	torpedo [Tribolium castaneum]	sp|P04412|EGFR_DROME	446	1.00E-124	Epidermal growth factor receptor OS=Drosophila melanogaster GN=Egfr PE=1 SV=3
Unigene10423_JingChaoZuZhi2	251	19	10.4239	gi|307755455|gb|EFO14689.1|	53.5	2.00E-06	hypothetical protein LOAG_13828 [Loa loa]	--	--	--	--
Unigene10424_JingChaoZuZhi2	289	14	6.6709	--	--	--	--	--	--	--	--
Unigene10425_JingChaoZuZhi2	383	40	14.3818	--	--	--	--	--	--	--	--
Unigene10426_JingChaoZuZhi2	346	28	11.1438	gi|167536053|ref|XP_001749699.1|	35.8	3.00E-06	hypothetical protein [Monosiga brevicollis MX1] >gi|163771847|gb|EDQ85508.1| predicted protein [Monosiga brevicollis MX1]	sp|Q84ZL0|FH5_ORYSJ	30.8	6.00E-06	Formin-like protein 5 OS=Oryza sativa subsp. japonica GN=FH5 PE=2 SV=2
Unigene10427_JingChaoZuZhi2	255	9	4.8602	--	--	--	--	--	--	--	--
Unigene10428_JingChaoZuZhi2	281	26	12.7414	--	--	--	--	--	--	--	--
Unigene10429_JingChaoZuZhi2	267	22	11.3465	--	--	--	--	--	--	--	--
Unigene1042_JingChaoZuZhi2	274	17	8.5438	--	--	--	--	--	--	--	--
Unigene10430_JingChaoZuZhi2	294	396	185.4811	--	--	--	--	--	--	--	--
Unigene10431_JingChaoZuZhi2	429	56	17.9756	--	--	--	--	--	--	--	--
Unigene10432_JingChaoZuZhi2	287	21	10.076	--	--	--	--	--	--	--	--
Unigene10433_JingChaoZuZhi2	277	12	5.9656	--	--	--	--	--	--	--	--
Unigene10434_JingChaoZuZhi2	425	58	18.7928	--	--	--	--	--	--	--	--
Unigene10435_JingChaoZuZhi2	415	80	26.5457	--	--	--	--	--	--	--	--
Unigene10436_JingChaoZuZhi2	622	102	22.582	--	--	--	--	--	--	--	--
Unigene10437_JingChaoZuZhi2	1579	428	37.3262	--	--	--	--	--	--	--	--
Unigene10438_JingChaoZuZhi2	417	18	5.9441	--	--	--	--	--	--	--	--
Unigene10439_JingChaoZuZhi2	786	135	23.6517	--	--	--	--	--	--	--	--
Unigene1043_JingChaoZuZhi2	233	16	9.4562	gi|47224162|emb|CAG13082.1|	43.5	4.00E-06	unnamed protein product [Tetraodon nigroviridis]	--	--	--	--
Unigene10440_JingChaoZuZhi2	1051	207	27.1219	--	--	--	--	--	--	--	--
Unigene10441_JingChaoZuZhi2	528	87	22.6901	--	--	--	--	--	--	--	--
Unigene10442_JingChaoZuZhi2	416	55	18.2063	--	--	--	--	--	--	--	--
Unigene10443_JingChaoZuZhi2	405	18	6.1203	gi|110760467|ref|XP_393666.3|	74.7	9.00E-13	PREDICTED: similar to phosphatidylinositol-3-phosphate/phosphatidylinositol 5-kinase, type III isoform 2 [Apis mellifera]	--	--	--	--
Unigene10444_JingChaoZuZhi2	369	28	10.4492	gi|198412012|ref|XP_002126084.1|	58.2	9.00E-08	PREDICTED: hypothetical protein [Ciona intestinalis]	--	--	--	--
Unigene10445_JingChaoZuZhi2	303	26	11.8163	--	--	--	--	--	--	--	--
Unigene10446_JingChaoZuZhi2	521	113	29.8671	gi|194858139|ref|XP_001969110.1|	53.9	2.00E-06	GG25239 [Drosophila erecta] >gi|190660977|gb|EDV58169.1| GG25239 [Drosophila erecta]	--	--	--	--
Unigene10447_JingChaoZuZhi2	300	32	14.6886	--	--	--	--	--	--	--	--
Unigene10448_JingChaoZuZhi2	450	28	8.5684	--	--	--	--	--	--	--	--
Unigene10449_JingChaoZuZhi2	1045	131	17.2626	gi|301771682|ref|XP_002921263.1|	74.3	7.00E-12	PREDICTED: transmembrane protein C20orf108-like [Ailuropoda melanoleuca]	sp|Q96KR6|CT108_HUMAN	72	7.00E-12	Transmembrane protein C20orf108 OS=Homo sapiens GN=C20orf108 PE=1 SV=2
Unigene1044_JingChaoZuZhi2	294	37	17.3303	gi|261331295|emb|CBH14285.1|	57.8	1.00E-07	T. brucei spp.-specific protein [Trypanosoma brucei gambiense DAL972]	sp|Q69566|U88_HHV6U	53.1	5.00E-07	Uncharacterized protein U88 OS=Human herpesvirus 6A (strain Uganda-1102) GN=U88 PE=4 SV=1
Unigene10450_JingChaoZuZhi2	493	40	11.1729	--	--	--	--	--	--	--	--
Unigene10451_JingChaoZuZhi2	462	33	9.8361	gi|72051808|ref|XP_791707.1|	77.8	1.00E-13	PREDICTED: similar to KIAA1161 protein [Strongylocentrotus purpuratus] >gi|115929626|ref|XP_001181672.1| PREDICTED: similar to KIAA1161 protein [Strongylocentrotus purpuratus]	sp|Q6NSJ0|K1161_HUMAN	70.5	4.00E-12	Uncharacterized family 31 glucosidase KIAA1161 OS=Homo sapiens GN=KIAA1161 PE=1 SV=2
Unigene10452_JingChaoZuZhi2	427	76	24.5097	--	--	--	--	--	--	--	--
Unigene10453_JingChaoZuZhi2	265	13	6.7554	--	--	--	--	--	--	--	--
Unigene10454_JingChaoZuZhi2	591	107	24.9315	gi|167516712|ref|XP_001742697.1|	52.8	8.00E-06	hypothetical protein [Monosiga brevicollis MX1] >gi|163779321|gb|EDQ92935.1| predicted protein [Monosiga brevicollis MX1]	--	--	--	--
Unigene10455_JingChaoZuZhi2	314	12	5.2626	--	--	--	--	--	--	--	--
Unigene10456_JingChaoZuZhi2	592	51	11.8632	gi|119627579|gb|EAX07174.1|	73.9	3.00E-12	hCG1793893 [Homo sapiens]	sp|P21997|SSGP_VOLCA	70.5	7.00E-12	Sulfated surface glycoprotein 185 OS=Volvox carteri PE=1 SV=1
Unigene10457_JingChaoZuZhi2	494	50	13.9378	gi|47208488|emb|CAF93086.1|	35.8	7.00E-06	unnamed protein product [Tetraodon nigroviridis]	--	--	--	--
Unigene10458_JingChaoZuZhi2	307	16	7.1768	--	--	--	--	--	--	--	--
Unigene10459_JingChaoZuZhi2	309	10	4.4565	--	--	--	--	--	--	--	--
Unigene1045_JingChaoZuZhi2	444	43	13.3364	gi|126571555|gb|ABO21409.1|	114	1.00E-24	kexokinase [Litopenaeus vannamei]	sp|Q9NFT7|HXK2_DROME	57	4.00E-08	Hexokinase type 2 OS=Drosophila melanogaster GN=Hex-t2 PE=2 SV=4
Unigene10460_JingChaoZuZhi2	273	11	5.5486	gi|158290592|ref|XP_312182.4|	139	3.00E-32	AGAP002739-PA [Anopheles gambiae str. PEST] >gi|157017969|gb|EAA08121.4| AGAP002739-PA [Anopheles gambiae str. PEST]	sp|Q6NZL8|SCUB1_MOUSE	58.5	1.00E-08	Signal peptide, CUB and EGF-like domain-containing protein 1 OS=Mus musculus GN=Scube1 PE=2 SV=2
Unigene10461_JingChaoZuZhi2	494	107	29.8269	--	--	--	--	--	--	--	--
Unigene10462_JingChaoZuZhi2	793	101	17.5388	gi|195400194|ref|XP_002058703.1|	53.5	8.00E-06	GJ14166 [Drosophila virilis] >gi|194142263|gb|EDW58671.1| GJ14166 [Drosophila virilis]	sp|Q7A362|SRAP_STAAN	52	5.00E-06	Serine-rich adhesin for platelets OS=Staphylococcus aureus (strain N315) GN=sraP PE=1 SV=1
Unigene10463_JingChaoZuZhi2	3716	900	33.3517	gi|193599056|ref|XP_001944075.1|	255	8.00E-66	PREDICTED: similar to Rho GTPase activating protein 15 [Acyrthosiphon pisum]	sp|Q6TLK4|RHG27_RAT	245	2.00E-63	Rho GTPase-activating protein 27 OS=Rattus norvegicus GN=Arhgap27 PE=1 SV=1
Unigene10464_JingChaoZuZhi2	777	36	6.3802	--	--	--	--	--	--	--	--
Unigene10465_JingChaoZuZhi2	327	10	4.2112	--	--	--	--	--	--	--	--
Unigene10466_JingChaoZuZhi2	460	127	38.0187	--	--	--	--	--	--	--	--
Unigene10467_JingChaoZuZhi2	313	16	7.0393	--	--	--	--	--	--	--	--
Unigene10468_JingChaoZuZhi2	557	47	11.6197	--	--	--	--	--	--	--	--
Unigene10469_JingChaoZuZhi2	355	18	6.9823	--	--	--	--	--	--	--	--
Unigene1046_JingChaoZuZhi2	402	61	20.8956	--	--	--	--	--	--	--	--
Unigene10470_JingChaoZuZhi2	583	25	5.905	gi|301762204|ref|XP_002916525.1|	134	2.00E-33	PREDICTED: zinc finger protein 658-like [Ailuropoda melanoleuca]	sp|P17032|ZN37A_HUMAN	133	3.00E-33	Zinc finger protein 37A OS=Homo sapiens GN=ZNF37A PE=2 SV=3
Unigene10471_JingChaoZuZhi2	304	25	11.3245	--	--	--	--	--	--	--	--
Unigene10472_JingChaoZuZhi2	311	7	3.0995	--	--	--	--	--	--	--	--
Unigene10473_JingChaoZuZhi2	337	19	7.7638	--	--	--	--	--	--	--	--
Unigene10474_JingChaoZuZhi2	458	49	14.7327	--	--	--	--	--	--	--	--
Unigene10475_JingChaoZuZhi2	752	63	11.5365	gi|15425681|dbj|BAB64297.1|	283	3.00E-75	I-connectin [Procambarus clarkii]	sp|Q9I7U4|TITIN_DROME	119	3.00E-26	Titin OS=Drosophila melanogaster GN=sls PE=1 SV=3
Unigene10476_JingChaoZuZhi2	594	36	8.3458	--	--	--	--	--	--	--	--
Unigene10477_JingChaoZuZhi2	260	10	5.2964	--	--	--	--	--	--	--	--
Unigene10478_JingChaoZuZhi2	281	21	10.2912	gi|307184998|gb|EFN71227.1|	93.2	1.00E-38	Kelch-like protein 20 [Camponotus floridanus]	sp|Q16RL8|KLHDB_AEDAE	92.4	1.00E-38	Kelch-like protein diablo OS=Aedes aegypti GN=dbo PE=3 SV=1
Unigene10479_JingChaoZuZhi2	364	23	8.7012	--	--	--	--	--	--	--	--
Unigene1047_JingChaoZuZhi2	1292	252	26.859	gi|195575603|ref|XP_002077667.1|	111	7.00E-23	GD23040 [Drosophila simulans] >gi|194189676|gb|EDX03252.1| GD23040 [Drosophila simulans]	sp|P49756|RBM25_HUMAN	69.3	6.00E-11	RNA-binding protein 25 OS=Homo sapiens GN=RBM25 PE=1 SV=3
Unigene10480_JingChaoZuZhi2	294	5	2.3419	gi|156392534|ref|XP_001636103.1|	46.6	2.00E-09	predicted protein [Nematostella vectensis] >gi|156223203|gb|EDO44040.1| predicted protein [Nematostella vectensis]	--	--	--	--
Unigene10481_JingChaoZuZhi2	411	21	7.0361	--	--	--	--	--	--	--	--
Unigene10482_JingChaoZuZhi2	262	65	34.1636	--	--	--	--	--	--	--	--
Unigene10483_JingChaoZuZhi2	359	33	12.6582	--	--	--	--	--	--	--	--
Unigene10484_JingChaoZuZhi2	272	14	7.0878	--	--	--	--	--	--	--	--
Unigene10485_JingChaoZuZhi2	272	4	2.0251	--	--	--	--	--	--	--	--
Unigene10486_JingChaoZuZhi2	1114	382	47.2204	--	--	--	--	--	--	--	--
Unigene10487_JingChaoZuZhi2	438	61	19.1782	gi|62859377|ref|NP_001016112.1|	196	2.00E-49	O-sialoglycoprotein endopeptidase [Xenopus (Silurana) tropicalis] >gi|111305744|gb|AAI21531.1| O-sialoglycoprotein endopeptidase [Xenopus (Silurana) tropicalis]	sp|Q7SYR1|OSGEP_XENLA	196	4.00E-50	Probable O-sialoglycoprotein endopeptidase OS=Xenopus laevis GN=osgep PE=2 SV=1
Unigene10488_JingChaoZuZhi2	409	68	22.8948	--	--	--	--	--	--	--	--
Unigene10489_JingChaoZuZhi2	256	19	10.2203	--	--	--	--	--	--	--	--
Unigene1048_JingChaoZuZhi2	703	108	21.1553	--	--	--	--	--	--	--	--
Unigene10490_JingChaoZuZhi2	353	25	9.7525	--	--	--	--	--	--	--	--
Unigene10491_JingChaoZuZhi2	530	19	4.9366	--	--	--	--	--	--	--	--
Unigene10492_JingChaoZuZhi2	485	127	36.059	gi|195397159|ref|XP_002057196.1|	66.2	4.00E-10	GJ16487 [Drosophila virilis] >gi|194146963|gb|EDW62682.1| GJ16487 [Drosophila virilis]	sp|P21997|SSGP_VOLCA	65.5	1.00E-10	Sulfated surface glycoprotein 185 OS=Volvox carteri PE=1 SV=1
Unigene10493_JingChaoZuZhi2	421	15	4.9064	--	--	--	--	--	--	--	--
Unigene10494_JingChaoZuZhi2	419	26	8.545	--	--	--	--	--	--	--	--
Unigene10495_JingChaoZuZhi2	284	47	22.7893	--	--	--	--	--	--	--	--
Unigene10496_JingChaoZuZhi2	261	6	3.1656	gi|224070563|ref|XP_002192809.1|	43.9	3.00E-08	PREDICTED: dynein, axonemal, heavy chain 3 [Taeniopygia guttata]	sp|Q8TD57|DYH3_HUMAN	38.9	2.00E-07	Dynein heavy chain 3, axonemal OS=Homo sapiens GN=DNAH3 PE=2 SV=1
Unigene10497_JingChaoZuZhi2	318	17	7.3616	--	--	--	--	--	--	--	--
Unigene10498_JingChaoZuZhi2	597	51	11.7638	gi|158301616|ref|XP_321283.4|	58.5	1.00E-07	AGAP001786-PA [Anopheles gambiae str. PEST] >gi|157012558|gb|EAA01115.5| AGAP001786-PA [Anopheles gambiae str. PEST]	sp|Q6MWG9|FH18_ORYSJ	59.7	1.00E-08	Formin-like protein 18 OS=Oryza sativa subsp. japonica GN=FH18 PE=2 SV=1
Unigene10499_JingChaoZuZhi2	947	327	47.5499	gi|110755224|ref|XP_396786.3|	270	4.00E-71	PREDICTED: similar to domino CG9696-PD, isoform D [Apis mellifera]	sp|Q8CHI8|EP400_MOUSE	219	3.00E-56	E1A-binding protein p400 OS=Mus musculus GN=Ep400 PE=1 SV=2
Unigene1049_JingChaoZuZhi2	265	67	34.8161	gi|115629205|ref|XP_001177825.1|	61.2	1.00E-08	PREDICTED: similar to endonuclease-reverse transcriptase [Strongylocentrotus purpuratus] >gi|115965877|ref|XP_001185788.1| PREDICTED: similar to endonuclease-reverse transcriptase [Strongylocentrotus purpuratus]	--	--	--	--
Unigene104_JingChaoZuZhi2	300	126	57.8364	--	--	--	--	--	--	--	--
Unigene10500_JingChaoZuZhi2	331	19	7.9046	--	--	--	--	--	--	--	--
Unigene10501_JingChaoZuZhi2	1129	216	26.3458	gi|156541487|ref|XP_001600405.1|	265	5.00E-87	PREDICTED: similar to kelch repeat protein [Nasonia vitripennis]	sp|Q921I2|KLDC4_MOUSE	201	3.00E-64	Kelch domain-containing protein 4 OS=Mus musculus GN=Klhdc4 PE=1 SV=2
Unigene10502_JingChaoZuZhi2	699	74	14.5783	gi|115744131|ref|XP_791189.2|	102	1.00E-20	PREDICTED: similar to HEAT repeat containing 2 [Strongylocentrotus purpuratus] >gi|115963161|ref|XP_001185358.1| PREDICTED: similar to HEAT repeat containing 2 [Strongylocentrotus purpuratus]	sp|Q86Y56|HEAT2_HUMAN	94.4	7.00E-19	HEAT repeat-containing protein 2 OS=Homo sapiens GN=HEATR2 PE=1 SV=3
Unigene10503_JingChaoZuZhi2	452	47	14.319	gi|194768949|ref|XP_001966573.1|	57	2.00E-07	GF22245 [Drosophila ananassae] >gi|190617337|gb|EDV32861.1| GF22245 [Drosophila ananassae]	sp|Q9NP73|ALG13_HUMAN	42.7	8.00E-07	UDP-N-acetylglucosamine transferase subunit ALG13 homolog OS=Homo sapiens GN=ALG13 PE=1 SV=2
Unigene10504_JingChaoZuZhi2	633	72	15.6632	--	--	--	--	--	--	--	--
Unigene10505_JingChaoZuZhi2	287	13	6.2375	--	--	--	--	--	--	--	--
Unigene10506_JingChaoZuZhi2	936	190	27.9531	--	--	--	--	--	--	--	--
Unigene10507_JingChaoZuZhi2	326	38	16.0516	--	--	--	--	--	--	--	--
Unigene10508_JingChaoZuZhi2	434	12	3.8075	--	--	--	--	--	--	--	--
Unigene10509_JingChaoZuZhi2	289	19	9.0533	--	--	--	--	--	--	--	--
Unigene1050_JingChaoZuZhi2	265	25	12.9911	gi|195035671|ref|XP_001989299.1|	70.1	2.00E-11	GH11652 [Drosophila grimshawi] >gi|193905299|gb|EDW04166.1| GH11652 [Drosophila grimshawi]	sp|Q29L80|U424_DROPS	69.3	7.00E-12	UPF0424 protein GA19395 OS=Drosophila pseudoobscura pseudoobscura GN=GA19395 PE=3 SV=1
Unigene10510_JingChaoZuZhi2	284	26	12.6069	--	--	--	--	--	--	--	--
Unigene10511_JingChaoZuZhi2	487	39	11.0278	gi|167526993|ref|XP_001747829.1|	53.5	3.00E-06	hypothetical protein [Monosiga brevicollis MX1] >gi|163773578|gb|EDQ87216.1| predicted protein [Monosiga brevicollis MX1]	--	--	--	--
Unigene10512_JingChaoZuZhi2	313	10	4.3995	--	--	--	--	--	--	--	--
Unigene10513_JingChaoZuZhi2	346	16	6.3679	gi|307185572|gb|EFN71532.1|	56.2	2.00E-12	Zinc finger and SCAN domain-containing protein 12 [Camponotus floridanus]	--	--	--	--
Unigene10514_JingChaoZuZhi2	435	54	17.0945	gi|71665597|ref|XP_819766.1|	60.5	2.00E-08	dispersed gene family protein 1 (DGF-1) [Trypanosoma cruzi strain CL Brener]	sp|Q92H62|RICKA_RICCN	51.6	2.00E-06	Arp2/3 complex-activating protein rickA OS=Rickettsia conorii GN=rickA PE=1 SV=2
Unigene10515_JingChaoZuZhi2	297	20	9.2731	gi|195040645|ref|XP_001991109.1|	28.5	7.00E-06	GH12253 [Drosophila grimshawi] >gi|193900867|gb|EDV99733.1| GH12253 [Drosophila grimshawi]	sp|A6R7X5|PAN1_AJECN	32	3.00E-06	Actin cytoskeleton-regulatory complex protein PAN1 OS=Ajellomyces capsulata (strain NAm1 / WU24) GN=PAN1 PE=3 SV=1
Unigene10516_JingChaoZuZhi2	346	9	3.5819	--	--	--	--	--	--	--	--
Unigene10517_JingChaoZuZhi2	320	19	8.1763	gi|221112308|ref|XP_002156072.1|	81.6	8.00E-15	PREDICTED: similar to CG40871 CG40871-PA [Hydra magnipapillata]	--	--	--	--
Unigene10518_JingChaoZuZhi2	466	35	10.3427	gi|292614821|ref|XP_002662413.1|	122	5.00E-27	PREDICTED: LReO_3-like [Danio rerio]	sp|P04323|POL3_DROME	78.2	2.00E-14	Retrovirus-related Pol polyprotein from transposon 17.6 OS=Drosophila melanogaster GN=pol PE=4 SV=1
Unigene10519_JingChaoZuZhi2	484	30	8.5355	gi|189233764|ref|XP_001814283.1|	232	4.00E-60	PREDICTED: similar to aaa atpase [Tribolium castaneum]	sp|O61577|KTNA1_STRPU	229	6.00E-60	Katanin p60 ATPase-containing subunit OS=Strongylocentrotus purpuratus GN=KATNA1 PE=1 SV=1
Unigene1051_JingChaoZuZhi2	323	80	34.1067	--	--	--	--	--	--	--	--
Unigene10520_JingChaoZuZhi2	476	25	7.2324	--	--	--	--	--	--	--	--
Unigene10521_JingChaoZuZhi2	790	54	9.4128	--	--	--	--	--	--	--	--
Unigene10522_JingChaoZuZhi2	264	9	4.6945	gi|72012476|ref|XP_786277.1|	60.8	1.00E-08	PREDICTED: similar to OSJNBa0059D20.6 [Strongylocentrotus purpuratus]	--	--	--	--
Unigene10523_JingChaoZuZhi2	275	25	12.5187	--	--	--	--	--	--	--	--
Unigene10524_JingChaoZuZhi2	383	9	3.2359	gi|195027461|ref|XP_001986601.1|	58.9	2.00E-15	GH20433 [Drosophila grimshawi] >gi|193902601|gb|EDW01468.1| GH20433 [Drosophila grimshawi]	--	--	--	--
Unigene10525_JingChaoZuZhi2	254	11	5.9636	--	--	--	--	--	--	--	--
Unigene10526_JingChaoZuZhi2	497	71	19.6722	gi|156540786|ref|XP_001600871.1|	77.4	2.00E-13	PREDICTED: similar to protease, reverse transcriptase, ribonuclease H, integrase [Nasonia vitripennis]	sp|Q5DTZ0|NYNRI_MOUSE	51.6	2.00E-06	Protein NYNRIN OS=Mus musculus GN=Nynrin PE=1 SV=2
Unigene10527_JingChaoZuZhi2	571	82	19.7756	gi|307203130|gb|EFN82310.1|	94.7	3.00E-24	Basement membrane-specific heparan sulfate proteoglycan core protein [Harpegnathos saltator]	sp|P98160|PGBM_HUMAN	40.4	6.00E-06	Basement membrane-specific heparan sulfate proteoglycan core protein OS=Homo sapiens GN=HSPG2 PE=1 SV=3
Unigene10528_JingChaoZuZhi2	903	86	13.1148	gi|189239973|ref|XP_966826.2|	59.7	4.00E-14	PREDICTED: similar to AGAP003000-PA [Tribolium castaneum]	--	--	--	--
Unigene10529_JingChaoZuZhi2	442	38	11.8389	gi|170574609|ref|XP_001892888.1|	82.8	3.00E-15	Zinc finger, C2H2 type family protein [Brugia malayi] >gi|158601344|gb|EDP38279.1| Zinc finger, C2H2 type family protein [Brugia malayi]	sp|Q5FWU5|ZN513_RAT	78.2	2.00E-14	Zinc finger protein 513 OS=Rattus norvegicus GN=Znf513 PE=2 SV=1
Unigene1052_JingChaoZuZhi2	459	72	21.6009	gi|148677652|gb|EDL09599.1|	58.9	5.00E-08	mCG147311 [Mus musculus]	sp|Q69566|U88_HHV6U	53.5	5.00E-07	Uncharacterized protein U88 OS=Human herpesvirus 6A (strain Uganda-1102) GN=U88 PE=4 SV=1
Unigene10530_JingChaoZuZhi2	879	95	14.8829	--	--	--	--	--	--	--	--
Unigene10531_JingChaoZuZhi2	946	89	12.9554	gi|193652620|ref|XP_001948864.1|	82.4	2.00E-14	PREDICTED: similar to GA20458-PA [Acyrthosiphon pisum]	--	--	--	--
Unigene10532_JingChaoZuZhi2	447	22	6.7775	gi|12060812|gb|AAG48248.1|AF282407_1	156	3.00E-40	p70 ribosomal protein S6 kinase [Artemia franciscana]	sp|P67999|KS6B1_RAT	149	5.00E-36	Ribosomal protein S6 kinase beta-1 OS=Rattus norvegicus GN=Rps6kb1 PE=1 SV=1
Unigene10533_JingChaoZuZhi2	357	18	6.9431	--	--	--	--	--	--	--	--
Unigene10534_JingChaoZuZhi2	346	54	21.4916	--	--	--	--	--	--	--	--
Unigene10535_JingChaoZuZhi2	335	12	4.9327	--	--	--	--	--	--	--	--
Unigene10536_JingChaoZuZhi2	319	25	10.792	gi|292622494|ref|XP_002665018.1|	149	3.00E-35	PREDICTED: Gag-Pol polyprotein-like [Danio rerio]	--	--	--	--
Unigene10537_JingChaoZuZhi2	413	24	8.0023	--	--	--	--	--	--	--	--
Unigene10538_JingChaoZuZhi2	920	281	42.0601	gi|148235078|ref|NP_001086607.1|	108	3.00E-22	G patch domain containing 3 [Xenopus laevis] >gi|50414470|gb|AAH77171.1| MGC78780 protein [Xenopus laevis]	sp|Q96I76|GPTC3_HUMAN	105	6.00E-22	G patch domain-containing protein 3 OS=Homo sapiens GN=GPATCH3 PE=2 SV=1
Unigene10539_JingChaoZuZhi2	400	77	26.5083	--	--	--	--	--	--	--	--
Unigene1053_JingChaoZuZhi2	349	48	18.9395	gi|270013850|gb|EFA10298.1|	56.2	3.00E-07	hypothetical protein TcasGA2_TC012513 [Tribolium castaneum]	--	--	--	--
Unigene10540_JingChaoZuZhi2	488	47	13.2626	gi|261331295|emb|CBH14285.1|	79.7	3.00E-14	T. brucei spp.-specific protein [Trypanosoma brucei gambiense DAL972]	sp|Q69566|U88_HHV6U	82.4	1.00E-15	Uncharacterized protein U88 OS=Human herpesvirus 6A (strain Uganda-1102) GN=U88 PE=4 SV=1
Unigene10541_JingChaoZuZhi2	260	18	9.5335	gi|158297841|ref|XP_318017.4|	71.6	8.00E-12	AGAP004795-PA [Anopheles gambiae str. PEST] >gi|157014520|gb|EAA13291.5| AGAP004795-PA [Anopheles gambiae str. PEST]	sp|O08856|ELL_MOUSE	65.5	1.00E-10	RNA polymerase II elongation factor ELL OS=Mus musculus GN=Ell PE=2 SV=1
Unigene10542_JingChaoZuZhi2	359	84	32.2208	gi|66501026|ref|XP_395481.2|	107	1.00E-22	PREDICTED: similar to 6-pyruvoyl tetrahydrobiopterin synthase (PTPS) (PTP synthase) (Sepiapterin synthase A) (Protein purple) isoform 1 [Apis mellifera]	sp|Q90W95|PTPS_POERE	95.1	1.00E-19	6-pyruvoyl tetrahydrobiopterin synthase OS=Poecilia reticulata GN=pts PE=2 SV=1
Unigene10543_JingChaoZuZhi2	321	29	12.4407	--	--	--	--	--	--	--	--
Unigene10544_JingChaoZuZhi2	280	15	7.3771	gi|291231172|ref|XP_002735543.1|	61.2	1.00E-08	PREDICTED: CG7708-like [Saccoglossus kowalevskii]	sp|Q9VE46|SC5A7_DROME	59.3	7.00E-09	High-affinity choline transporter 1 OS=Drosophila melanogaster GN=CG7708 PE=2 SV=2
Unigene10545_JingChaoZuZhi2	307	13	5.8312	gi|221120780|ref|XP_002167062.1|	60.5	2.00E-08	PREDICTED: similar to gag-pol polyprotein [Hydra magnipapillata]	--	--	--	--
Unigene10546_JingChaoZuZhi2	314	39	17.1036	--	--	--	--	--	--	--	--
Unigene10547_JingChaoZuZhi2	851	96	15.5344	gi|195452406|ref|XP_002073340.1|	170	7.00E-41	GK13206 [Drosophila willistoni] >gi|194169425|gb|EDW84326.1| GK13206 [Drosophila willistoni]	sp|O60343|TBCD4_HUMAN	143	1.00E-33	TBC1 domain family member 4 OS=Homo sapiens GN=TBC1D4 PE=1 SV=2
Unigene10548_JingChaoZuZhi2	295	17	7.9356	--	--	--	--	--	--	--	--
Unigene10549_JingChaoZuZhi2	2686	753	38.6047	--	--	--	--	--	--	--	--
Unigene1054_JingChaoZuZhi2	290	21	9.9718	gi|149021019|gb|EDL78626.1|	54.3	1.00E-06	rCG55816 [Rattus norvegicus]	sp|Q5HZG4|TAF3_MOUSE	50.8	2.00E-06	Transcription initiation factor TFIID subunit 3 OS=Mus musculus GN=Taf3 PE=1 SV=2
Unigene10550_JingChaoZuZhi2	572	72	17.3336	--	--	--	--	--	--	--	--
Unigene10551_JingChaoZuZhi2	316	22	9.5871	--	--	--	--	--	--	--	--
Unigene10552_JingChaoZuZhi2	445	40	12.378	--	--	--	--	--	--	--	--
Unigene10553_JingChaoZuZhi2	381	15	5.4215	--	--	--	--	sp|A5E4P1|PXR1_LODEL	49.3	7.00E-06	Protein PXR1 OS=Lodderomyces elongisporus GN=PXR1 PE=3 SV=1
Unigene10554_JingChaoZuZhi2	1040	181	23.9661	--	--	--	--	--	--	--	--
Unigene10555_JingChaoZuZhi2	1952	318	22.4336	gi|193713561|ref|XP_001945701.1|	405	0	PREDICTED: similar to synaptic ras gtpase activating protein, syngap [Acyrthosiphon pisum]	sp|Q8T498|GAP2_DROME	325	4.00E-154	Probable Ras GTPase-activating protein OS=Drosophila melanogaster GN=CG42270 PE=1 SV=3
Unigene10556_JingChaoZuZhi2	303	20	9.0895	--	--	--	--	--	--	--	--
Unigene10557_JingChaoZuZhi2	417	48	15.851	--	--	--	--	--	--	--	--
Unigene10558_JingChaoZuZhi2	463	72	21.4143	gi|193638923|ref|XP_001946541.1|	58.2	9.00E-08	PREDICTED: similar to Transcription initiation factor IIF alpha subunit [Acyrthosiphon pisum]	sp|Q7M732|RTL1_MOUSE	54.7	2.00E-07	Retrotransposon-like protein 1 OS=Mus musculus GN=Rtl1 PE=2 SV=1
Unigene10559_JingChaoZuZhi2	437	44	13.8651	--	--	--	--	--	--	--	--
Unigene1055_JingChaoZuZhi2	792	282	49.0316	--	--	--	--	--	--	--	--
Unigene10560_JingChaoZuZhi2	541	21	5.3453	--	--	--	--	--	--	--	--
Unigene10561_JingChaoZuZhi2	280	35	17.2132	--	--	--	--	--	--	--	--
Unigene10562_JingChaoZuZhi2	829	123	20.4316	gi|91079380|ref|XP_970959.1|	90.9	5.00E-17	PREDICTED: similar to GA11625-PA [Tribolium castaneum]	sp|Q8VIJ6|SFPQ_MOUSE	53.9	1.00E-06	Splicing factor, proline- and glutamine-rich OS=Mus musculus GN=Sfpq PE=1 SV=1
Unigene10563_JingChaoZuZhi2	316	17	7.4082	--	--	--	--	--	--	--	--
Unigene10564_JingChaoZuZhi2	541	73	18.5814	--	--	--	--	--	--	--	--
Unigene10565_JingChaoZuZhi2	302	4	1.8239	gi|91078340|ref|XP_973522.1|	87.8	1.00E-36	PREDICTED: similar to AGAP003613-PA [Tribolium castaneum]	sp|Q8R173|ZDHC3_MOUSE	75.9	7.00E-29	Palmitoyltransferase ZDHHC3 OS=Mus musculus GN=Zdhhc3 PE=1 SV=1
Unigene10566_JingChaoZuZhi2	309	13	5.7934	--	--	--	--	--	--	--	--
Unigene10567_JingChaoZuZhi2	424	17	5.5212	--	--	--	--	sp|P33485|VNUA_SUHVK	35.8	1.00E-06	Probable nuclear antigen OS=Suid herpesvirus 1 (strain Kaplan) PE=4 SV=1
Unigene10568_JingChaoZuZhi2	291	11	5.2054	--	--	--	--	--	--	--	--
Unigene10569_JingChaoZuZhi2	604	64	14.5913	--	--	--	--	--	--	--	--
Unigene1056_JingChaoZuZhi2	442	37	11.5274	gi|110755196|ref|XP_001119920.1|	84.7	9.00E-16	PREDICTED: similar to dumpy CG33196-PB [Apis mellifera]	sp|O08999|LTBP2_MOUSE	54.7	2.00E-07	Latent-transforming growth factor beta-binding protein 2 OS=Mus musculus GN=Ltbp2 PE=1 SV=2
Unigene10570_JingChaoZuZhi2	689	132	26.3819	gi|293342144|ref|XP_001063390.2|	56.2	1.00E-06	PREDICTED: spastic ataxia of Charlevoix-Saguenay (sacsin) [Rattus norvegicus] >gi|293353889|ref|XP_224256.5| PREDICTED: spastic ataxia of Charlevoix-Saguenay (sacsin) [Rattus norvegicus]	sp|Q9JLC8|SACS_MOUSE	56.2	2.00E-07	Sacsin OS=Mus musculus GN=Sacs PE=1 SV=2
Unigene10571_JingChaoZuZhi2	273	11	5.5486	gi|307168943|gb|EFN61829.1|	70.1	2.00E-11	Patched domain-containing protein 3 [Camponotus floridanus]	--	--	--	--
Unigene10572_JingChaoZuZhi2	379	55	19.9837	--	--	--	--	--	--	--	--
Unigene10573_JingChaoZuZhi2	257	18	9.6448	gi|148697053|gb|EDL29000.1|	53.5	2.00E-06	reproductive homeobox 8 [Mus musculus]	--	--	--	--
Unigene10574_JingChaoZuZhi2	415	70	23.2275	gi|222418645|ref|NP_689504.2|	52.4	5.00E-06	mucin-7 precursor [Homo sapiens] >gi|222418647|ref|NP_001138478.1| mucin-7 precursor [Homo sapiens] >gi|222418649|ref|NP_001138479.1| mucin-7 precursor [Homo sapiens] >gi|296439230|sp|Q8TAX7.2|MUC7_HUMAN RecName: Full=Mucin-7; Short=MUC-7; AltName: Full=Apo-MG2; AltName: Full=Salivary mucin-7; Flags: Precursor >gi|119626026|gb|EAX05621.1| mucin 7, secreted [Homo sapiens]	sp|Q8TAX7|MUC7_HUMAN	52.4	9.00E-07	Mucin-7 OS=Homo sapiens GN=MUC7 PE=1 SV=2
Unigene10575_JingChaoZuZhi2	292	12	5.6591	--	--	--	--	--	--	--	--
Unigene10576_JingChaoZuZhi2	711	189	36.6053	gi|307188295|gb|EFN73087.1|	201	2.00E-50	Protein CASC3 [Camponotus floridanus]	sp|Q1ECZ4|CASC3_DANRE	125	2.00E-28	Protein CASC3 OS=Danio rerio GN=casc3 PE=1 SV=1
Unigene10577_JingChaoZuZhi2	598	38	8.7505	--	--	--	--	--	--	--	--
Unigene10578_JingChaoZuZhi2	353	86	33.5487	gi|144952808|gb|ABP04058.1|	154	1.00E-36	DNA methyltransferase 2 [Macrobrachium rosenbergii]	sp|Q7YS61|TRDMT_BOVIN	117	2.00E-26	tRNA (cytosine-5-)-methyltransferase OS=Bos taurus GN=TRDMT1 PE=2 SV=1
Unigene10579_JingChaoZuZhi2	607	84	19.0565	--	--	--	--	--	--	--	--
Unigene1057_JingChaoZuZhi2	238	36	20.8294	--	--	--	--	--	--	--	--
Unigene10580_JingChaoZuZhi2	343	12	4.8177	--	--	--	--	sp|B0R0T1|K0564_DANRE	37.7	4.00E-06	Uncharacterized protein KIAA0564 homolog OS=Danio rerio GN=si:dkey-18l1.1 PE=4 SV=1
Unigene10581_JingChaoZuZhi2	1245	405	44.7958	--	--	--	--	--	--	--	--
Unigene10582_JingChaoZuZhi2	631	40	8.7294	gi|115313453|gb|AAI23958.1|	66.2	2.00E-15	LOC779576 protein [Xenopus (Silurana) tropicalis]	sp|Q5AED9|BBP_CANAL	80.1	7.00E-15	Branchpoint-bridging protein OS=Candida albicans GN=BBP PE=3 SV=1
Unigene10583_JingChaoZuZhi2	701	146	28.6805	gi|291242548|ref|XP_002741168.1|	184	2.00E-45	PREDICTED: suppressor of variegation 3-3-like [Saccoglossus kowalevskii]	sp|O60341|KDM1A_HUMAN	172	2.00E-42	Lysine-specific histone demethylase 1A OS=Homo sapiens GN=KDM1A PE=1 SV=2
Unigene10584_JingChaoZuZhi2	315	16	6.9946	--	--	--	--	--	--	--	--
Unigene10585_JingChaoZuZhi2	307	22	9.8682	gi|195389747|ref|XP_002053536.1|	191	5.00E-48	GJ23295 [Drosophila virilis] >gi|194151622|gb|EDW67056.1| GJ23295 [Drosophila virilis]	sp|P51123|TAF1_DROME	186	3.00E-47	Transcription initiation factor TFIID subunit 1 OS=Drosophila melanogaster GN=Taf1 PE=1 SV=3
Unigene10586_JingChaoZuZhi2	1079	236	30.1191	gi|149698214|ref|XP_001502510.1|	284	4.00E-75	PREDICTED: similar to RAB33B, member RAS oncogene family [Equus caballus]	sp|Q5R615|RB33B_PONAB	282	3.00E-75	Ras-related protein Rab-33B OS=Pongo abelii GN=RAB33B PE=2 SV=1
Unigene10587_JingChaoZuZhi2	313	49	21.5578	--	--	--	--	--	--	--	--
Unigene10588_JingChaoZuZhi2	998	160	22.0771	--	--	--	--	--	--	--	--
Unigene10589_JingChaoZuZhi2	527	59	15.4168	gi|195036940|ref|XP_001989926.1|	77	3.00E-13	GH18525 [Drosophila grimshawi] >gi|193894122|gb|EDV92988.1| GH18525 [Drosophila grimshawi]	sp|Q925I0|KR161_MOUSE	57.4	5.00E-08	Keratin-associated protein 16-1 OS=Mus musculus GN=Krtap16-1 PE=2 SV=1
Unigene1058_JingChaoZuZhi2	277	8	3.9771	gi|8493519|gb|AAB35286.2|	57.4	1.00E-07	nuclear localization signal binding protein [Mus musculus]	sp|Q4PBP6|NST1_USTMA	53.5	4.00E-07	Stress response protein NST1 OS=Ustilago maydis GN=NST1 PE=3 SV=1
Unigene10590_JingChaoZuZhi2	299	50	23.0277	--	--	--	--	--	--	--	--
Unigene10591_JingChaoZuZhi2	779	111	19.6217	--	--	--	--	--	--	--	--
Unigene10592_JingChaoZuZhi2	328	70	29.3884	gi|261331295|emb|CBH14285.1|	54.3	1.00E-06	T. brucei spp.-specific protein [Trypanosoma brucei gambiense DAL972]	sp|Q69566|U88_HHV6U	52	1.00E-06	Uncharacterized protein U88 OS=Human herpesvirus 6A (strain Uganda-1102) GN=U88 PE=4 SV=1
Unigene10593_JingChaoZuZhi2	760	43	7.7912	--	--	--	--	--	--	--	--
Unigene10594_JingChaoZuZhi2	463	24	7.1381	--	--	--	--	--	--	--	--
Unigene10595_JingChaoZuZhi2	328	34	14.2744	--	--	--	--	--	--	--	--
Unigene10596_JingChaoZuZhi2	783	53	9.3211	gi|224080438|ref|XP_002190231.1|	109	1.00E-24	PREDICTED: OTU domain containing 3 [Taeniopygia guttata]	sp|Q5T2D3|OTUD3_HUMAN	107	1.00E-22	OTU domain-containing protein 3 OS=Homo sapiens GN=OTUD3 PE=1 SV=1
Unigene10597_JingChaoZuZhi2	522	49	12.9264	gi|195019099|ref|XP_001984908.1|	128	1.00E-28	GH14786 [Drosophila grimshawi] >gi|193898390|gb|EDV97256.1| GH14786 [Drosophila grimshawi]	sp|Q5SS00|ZDBF2_MOUSE	119	8.00E-27	DBF4-type zinc finger-containing protein 2 homolog OS=Mus musculus GN=Zdbf2 PE=2 SV=1
Unigene10598_JingChaoZuZhi2	344	27	10.8083	gi|66363186|ref|XP_628559.1|	52	6.00E-06	cryptopsoridial mucin, large thr stretch, signal peptide sequence [Cryptosporidium parvum Iowa II] >gi|46229571|gb|EAK90389.1| cryptopsoridial mucin, large thr stretch, signal peptide sequence [Cryptosporidium parvum Iowa II]	--	--	--	--
Unigene10599_JingChaoZuZhi2	383	46	16.5391	gi|224047520|ref|XP_002197207.1|	58.5	7.00E-08	PREDICTED: anaphase promoting complex subunit 1 [Taeniopygia guttata]	sp|Q9H1A4|APC1_HUMAN	55.8	8.00E-08	Anaphase-promoting complex subunit 1 OS=Homo sapiens GN=ANAPC1 PE=1 SV=1
Unigene1059_JingChaoZuZhi2	510	80	21.6009	--	--	--	--	--	--	--	--
Unigene105_JingChaoZuZhi2	583	104	24.565	--	--	--	--	--	--	--	--
Unigene10600_JingChaoZuZhi2	405	32	10.8804	--	--	--	--	--	--	--	--
Unigene10601_JingChaoZuZhi2	792	94	16.3439	gi|73971638|ref|XP_531935.2|	256	6.00E-67	PREDICTED: similar to multiple PDZ domain protein [Canis familiaris]	sp|O75970|MPDZ_HUMAN	246	1.00E-64	Multiple PDZ domain protein OS=Homo sapiens GN=MPDZ PE=1 SV=1
Unigene10602_JingChaoZuZhi2	289	37	17.6301	--	--	--	--	--	--	--	--
Unigene10603_JingChaoZuZhi2	1117	120	14.7938	gi|91094127|ref|XP_968492.1|	491	1.00E-137	PREDICTED: similar to GA20276-PA [Tribolium castaneum]	sp|Q5R7G6|PEPL1_PONAB	473	8.00E-133	Probable aminopeptidase NPEPL1 OS=Pongo abelii GN=NPEPL1 PE=3 SV=2
Unigene10604_JingChaoZuZhi2	376	24	8.7897	--	--	--	--	--	--	--	--
Unigene10605_JingChaoZuZhi2	288	33	15.7788	gi|124801292|ref|XP_001349655.1|	62.4	5.00E-09	acyl-CoA synthetase, PfACS9 [Plasmodium falciparum 3D7] >gi|3845250|gb|AAC71926.1| acyl-CoA synthetase, PfACS9 [Plasmodium falciparum 3D7]	sp|P13816|GARP_PLAFF	57.4	3.00E-08	Glutamic acid-rich protein OS=Plasmodium falciparum (isolate FC27 / Papua New Guinea) GN=GARP PE=4 SV=1
Unigene10606_JingChaoZuZhi2	460	66	19.7578	--	--	--	--	--	--	--	--
Unigene10607_JingChaoZuZhi2	290	31	14.7203	gi|66533186|ref|XP_395995.2|	87	2.00E-16	PREDICTED: similar to CG6600-PA isoform 1, partial [Apis mellifera]	sp|O76082|S22A5_HUMAN	56.2	6.00E-08	Solute carrier family 22 member 5 OS=Homo sapiens GN=SLC22A5 PE=1 SV=1
Unigene10608_JingChaoZuZhi2	402	114	39.0509	--	--	--	--	--	--	--	--
Unigene10609_JingChaoZuZhi2	668	102	21.0269	--	--	--	--	--	--	--	--
Unigene1060_JingChaoZuZhi2	732	97	18.2479	gi|307695425|gb|ADN84928.1|	200	1.00E-110	actin [Helicoverpa armigera]	sp|P49871|ACT_MANSE	200	2.00E-110	Actin, muscle OS=Manduca sexta PE=2 SV=1
Unigene10610_JingChaoZuZhi2	489	65	18.3044	gi|195448885|ref|XP_002071856.1|	57	5.00E-10	GK24932 [Drosophila willistoni] >gi|194167941|gb|EDW82842.1| GK24932 [Drosophila willistoni]	sp|P48555|RALA_DROME	57	5.00E-08	Ras-related protein Ral-a OS=Drosophila melanogaster GN=Rala PE=2 SV=2
Unigene10611_JingChaoZuZhi2	327	29	12.2124	--	--	--	--	--	--	--	--
Unigene10612_JingChaoZuZhi2	739	60	11.1804	gi|195379630|ref|XP_002048581.1|	61.6	3.00E-08	GJ11275 [Drosophila virilis] >gi|194155739|gb|EDW70923.1| GJ11275 [Drosophila virilis]	sp|Q8MP30|Y7791_DICDI	61.2	7.00E-09	Uncharacterized histidine-rich protein DDB_G0274557 OS=Dictyostelium discoideum GN=DDB_G0274557 PE=4 SV=1
Unigene10613_JingChaoZuZhi2	441	50	15.6129	--	--	--	--	--	--	--	--
Unigene10614_JingChaoZuZhi2	326	8	3.3793	gi|307207075|gb|EFN84884.1|	94	1.00E-18	Protein diaphanous [Harpegnathos saltator]	sp|P21260|YPRO_OWEFU	89.4	7.00E-18	Uncharacterized proline-rich protein (Fragment) OS=Owenia fusiformis PE=4 SV=1
Unigene10615_JingChaoZuZhi2	397	69	23.9337	gi|195040645|ref|XP_001991109.1|	92	6.00E-18	GH12253 [Drosophila grimshawi] >gi|193900867|gb|EDV99733.1| GH12253 [Drosophila grimshawi]	sp|P21260|YPRO_OWEFU	89.7	5.00E-18	Uncharacterized proline-rich protein (Fragment) OS=Owenia fusiformis PE=4 SV=1
Unigene10616_JingChaoZuZhi2	854	98	15.8023	gi|282722852|gb|ADA84472.1|	70.5	7.00E-11	retinitis pigmentosa GTPase regulator protein 2 ORF15 [Danio rerio]	sp|Q54MI3|SUN2_DICDI	59.7	2.00E-08	SUN domain-containing protein 2 OS=Dictyostelium discoideum GN=sun2 PE=3 SV=1
Unigene10617_JingChaoZuZhi2	530	83	21.5652	gi|156544319|ref|XP_001607204.1|	293	3.00E-78	PREDICTED: similar to ENSANGP00000029084 [Nasonia vitripennis]	sp|Q8I8U7|TRA1_DROME	261	1.00E-69	Transcription-associated protein 1 OS=Drosophila melanogaster GN=Nipped-A PE=1 SV=3
Unigene10618_JingChaoZuZhi2	282	10	4.8832	--	--	--	--	--	--	--	--
Unigene10619_JingChaoZuZhi2	315	97	42.4046	--	--	--	--	--	--	--	--
Unigene1061_JingChaoZuZhi2	258	16	8.5399	--	--	--	--	--	--	--	--
Unigene10620_JingChaoZuZhi2	711	69	13.3638	--	--	--	--	--	--	--	--
Unigene10621_JingChaoZuZhi2	492	29	8.1168	--	--	--	--	sp|Q9SN46|LRX5_ARATH	50.1	7.00E-06	Leucine-rich repeat extensin-like protein 5 OS=Arabidopsis thaliana GN=LRX5 PE=2 SV=2
Unigene10622_JingChaoZuZhi2	474	56	16.269	gi|72009127|ref|XP_784614.1|	78.2	9.00E-14	PREDICTED: similar to Vac14 homolog (S. cerevisiae) [Strongylocentrotus purpuratus] >gi|115946315|ref|XP_001181269.1| PREDICTED: similar to Vac14 homolog (S. cerevisiae) [Strongylocentrotus purpuratus]	sp|Q5ZIW5|VAC14_CHICK	74.3	3.00E-13	Protein VAC14 homolog OS=Gallus gallus GN=VAC14 PE=2 SV=1
Unigene10623_JingChaoZuZhi2	742	73	13.5479	--	--	--	--	--	--	--	--
Unigene10624_JingChaoZuZhi2	469	69	20.2595	--	--	--	--	--	--	--	--
Unigene10625_JingChaoZuZhi2	311	18	7.9701	--	--	--	--	--	--	--	--
Unigene10626_JingChaoZuZhi2	759	148	26.8517	--	--	--	--	--	--	--	--
Unigene10627_JingChaoZuZhi2	525	71	18.6231	--	--	--	--	--	--	--	--
Unigene10628_JingChaoZuZhi2	835	92	15.1724	gi|110758177|ref|XP_392462.3|	84.7	4.00E-15	PREDICTED: similar to Stretchin-Mlck CG18255-PA, isoform A [Apis mellifera]	sp|Q8N7Z2|GG6L1_HUMAN	80.5	1.00E-14	Golgin subfamily A member 6-like protein 1 OS=Homo sapiens GN=GOLGA6L1 PE=2 SV=2
Unigene10629_JingChaoZuZhi2	290	23	10.9215	--	--	--	--	--	--	--	--
Unigene1062_JingChaoZuZhi2	237	8	4.6483	gi|260833676|ref|XP_002611838.1|	37	2.00E-06	hypothetical protein BRAFLDRAFT_123362 [Branchiostoma floridae] >gi|229297210|gb|EEN67847.1| hypothetical protein BRAFLDRAFT_123362 [Branchiostoma floridae]	sp|A7TRW3|AIM3_VANPO	38.9	1.00E-07	Altered inheritance of mitochondria protein 3 OS=Vanderwaltozyma polyspora (strain ATCC 22028 / DSM 70294) GN=AIM3 PE=3 SV=1
Unigene10630_JingChaoZuZhi2	512	118	31.7368	gi|41393113|ref|NP_958886.1|	52.4	7.00E-06	collagen, type I, alpha 1b [Danio rerio] >gi|34784485|gb|AAH58045.1| Collagen, type I, alpha 3 [Danio rerio]	--	--	--	--
Unigene10631_JingChaoZuZhi2	340	10	4.0502	--	--	--	--	--	--	--	--
Unigene10632_JingChaoZuZhi2	338	46	18.741	gi|170575217|ref|XP_001893148.1|	58.9	5.00E-08	Hypothetical 17.1 kDa protein in PUR5 3'region [Brugia malayi]	sp|Q69566|U88_HHV6U	51.6	1.00E-06	Uncharacterized protein U88 OS=Human herpesvirus 6A (strain Uganda-1102) GN=U88 PE=4 SV=1
Unigene10633_JingChaoZuZhi2	453	36	10.9435	gi|291233977|ref|XP_002736929.1|	184	8.00E-46	PREDICTED: nat10 protein-like [Saccoglossus kowalevskii]	sp|Q55EJ3|NAT10_DICDI	178	1.00E-44	N-acetyltransferase 10 homolog OS=Dictyostelium discoideum GN=nat10 PE=3 SV=1
Unigene10634_JingChaoZuZhi2	1202	287	32.8798	gi|115803132|ref|XP_001198853.1|	174	6.00E-42	PREDICTED: similar to endonuclease-reverse transcriptase [Strongylocentrotus purpuratus] >gi|115943868|ref|XP_001196835.1| PREDICTED: similar to endonuclease-reverse transcriptase [Strongylocentrotus purpuratus]	sp|Q03278|PO21_NASVI	52	9.00E-06	Retrovirus-related Pol polyprotein from type-1 retrotransposable element R2 (Fragment) OS=Nasonia vitripennis PE=4 SV=2
Unigene10635_JingChaoZuZhi2	630	74	16.1749	gi|91080035|ref|XP_972573.1|	82.8	8.00E-15	PREDICTED: similar to Zinc finger RAD18 domain-containing protein C1orf124 [Tribolium castaneum]	sp|A5D979|CA124_BOVIN	64.3	6.00E-10	Zinc finger RAD18 domain-containing protein C1orf124 homolog OS=Bos taurus PE=2 SV=1
Unigene10636_JingChaoZuZhi2	1928	272	19.4274	--	--	--	--	--	--	--	--
Unigene10637_JingChaoZuZhi2	762	73	13.1923	gi|195392413|ref|XP_002054852.1|	466	1.00E-130	GJ22568 [Drosophila virilis] >gi|194152938|gb|EDW68372.1| GJ22568 [Drosophila virilis]	sp|P50464|UNC97_CAEEL	403	8.00E-112	LIM domain-containing protein unc-97 OS=Caenorhabditis elegans GN=unc-97 PE=1 SV=1
Unigene10638_JingChaoZuZhi2	253	3	1.6329	--	--	--	--	--	--	--	--
Unigene10639_JingChaoZuZhi2	264	13	6.781	gi|301765988|ref|XP_002918415.1|	183	2.00E-45	PREDICTED: 40S ribosomal protein S24-like [Ailuropoda melanoleuca]	sp|P62850|RS24_RAT	183	3.00E-46	40S ribosomal protein S24 OS=Rattus norvegicus GN=Rps24 PE=2 SV=1
Unigene1063_JingChaoZuZhi2	346	31	12.3378	gi|215794267|gb|ACJ70121.1|	53.1	3.00E-06	bindin precursor [Patiria miniata]	--	--	--	--
Unigene10640_JingChaoZuZhi2	354	19	7.391	gi|115655535|ref|XP_791719.2|	111	7.00E-24	PREDICTED: similar to solute carrier 19A3 [Strongylocentrotus purpuratus] >gi|115965358|ref|XP_001187862.1| PREDICTED: similar to solute carrier 19A3 [Strongylocentrotus purpuratus]	sp|Q4R877|S19A3_MACFA	97.4	2.00E-20	Thiamine transporter 2 OS=Macaca fascicularis GN=SLC19A3 PE=2 SV=1
Unigene10641_JingChaoZuZhi2	465	23	6.8112	--	--	--	--	--	--	--	--
Unigene10642_JingChaoZuZhi2	332	39	16.1763	--	--	--	--	--	--	--	--
Unigene10643_JingChaoZuZhi2	252	8	4.3716	--	--	--	--	--	--	--	--
Unigene10644_JingChaoZuZhi2	304	14	6.3417	gi|224047950|ref|XP_002194783.1|	53.5	2.00E-06	PREDICTED: hypothetical protein, partial [Taeniopygia guttata]	--	--	--	--
Unigene10645_JingChaoZuZhi2	4244	1144	37.1195	gi|158295468|ref|XP_001688808.1|	945	0	AGAP006165-PB [Anopheles gambiae str. PEST] >gi|157016052|gb|EDO63814.1| AGAP006165-PB [Anopheles gambiae str. PEST]	sp|Q9NDJ2|DOM_DROME	840	0	Helicase domino OS=Drosophila melanogaster GN=dom PE=1 SV=2
Unigene10646_JingChaoZuZhi2	906	142	21.583	gi|91077832|ref|XP_971200.1|	146	5.00E-94	PREDICTED: similar to CG2260 CG2260-PA [Tribolium castaneum]	sp|Q9Z0H1|WDR46_MOUSE	143	2.00E-83	WD repeat-containing protein 46 OS=Mus musculus GN=Wdr46 PE=2 SV=1
Unigene10647_JingChaoZuZhi2	1368	291	29.2926	gi|301777778|ref|XP_002924282.1|	339	1.00E-91	PREDICTED: zinc finger protein 235-like [Ailuropoda melanoleuca]	sp|Q14590|ZN235_HUMAN	335	3.00E-91	Zinc finger protein 235 OS=Homo sapiens GN=ZNF235 PE=2 SV=3
Unigene10648_JingChaoZuZhi2	258	17	9.0736	--	--	--	--	--	--	--	--
Unigene10649_JingChaoZuZhi2	392	29	10.1874	gi|194762028|ref|XP_001963163.1|	56.6	3.00E-07	GF14082 [Drosophila ananassae] >gi|190616860|gb|EDV32384.1| GF14082 [Drosophila ananassae]	--	--	--	--
Unigene1064_JingChaoZuZhi2	1055	356	46.4675	--	--	--	--	--	--	--	--
Unigene10650_JingChaoZuZhi2	341	11	4.4421	gi|123367820|ref|XP_001297178.1|	53.1	3.00E-06	polymorphic outer membrane protein [Trichomonas vaginalis G3]	--	--	--	--
Unigene10651_JingChaoZuZhi2	266	13	6.73	--	--	--	--	--	--	--	--
Unigene10652_JingChaoZuZhi2	852	114	18.4254	gi|215277024|sp|A4QP31.3|TBCC1_DANRE	121	4.00E-26	RecName: Full=TBCC domain-containing protein 1	sp|A4QP31|TBCC1_DANRE	121	7.00E-27	TBCC domain-containing protein 1 OS=Danio rerio GN=tbccd1 PE=2 SV=3
Unigene10653_JingChaoZuZhi2	386	89	31.7508	--	--	--	--	--	--	--	--
Unigene10654_JingChaoZuZhi2	300	13	5.9672	--	--	--	--	--	--	--	--
Unigene10655_JingChaoZuZhi2	504	48	13.1148	--	--	--	--	--	--	--	--
Unigene10656_JingChaoZuZhi2	260	34	18.0077	--	--	--	--	--	--	--	--
Unigene10657_JingChaoZuZhi2	536	102	26.2052	--	--	--	--	--	--	--	--
Unigene10658_JingChaoZuZhi2	760	172	31.165	--	--	--	--	--	--	--	--
Unigene10659_JingChaoZuZhi2	588	36	8.431	--	--	--	--	sp|Q7T6X1|YR610_MIMIV	52.4	2.00E-06	Uncharacterized protein R610 OS=Acanthamoeba polyphaga mimivirus GN=MIMI_R610 PE=1 SV=2
Unigene1065_JingChaoZuZhi2	256	45	24.2061	gi|37654240|gb|AAQ96225.1|	52.8	4.00E-06	LRRGT00012 [Rattus norvegicus] >gi|149047838|gb|EDM00454.1| LRRGT00012 [Rattus norvegicus]	--	--	--	--
Unigene10660_JingChaoZuZhi2	341	12	4.8459	gi|268637811|ref|XP_639951.2|	109	8.00E-43	5-oxoprolinase [Dictyostelium discoideum AX4] >gi|239938674|sp|Q54NW6.2|OPLA_DICDI RecName: Full=5-oxoprolinase; AltName: Full=5-oxo-L-prolinase; Short=5-OPase; AltName: Full=Pyroglutamase >gi|256012899|gb|EAL64940.2| 5-oxoprolinase [Dictyostelium discoideum AX4]	sp|Q54NW6|OPLA_DICDI	109	1.00E-43	5-oxoprolinase OS=Dictyostelium discoideum GN=oplah PE=3 SV=2
Unigene10661_JingChaoZuZhi2	305	10	4.5149	--	--	--	--	--	--	--	--
Unigene10662_JingChaoZuZhi2	469	28	8.2212	--	--	--	--	--	--	--	--
Unigene10663_JingChaoZuZhi2	262	18	9.4607	--	--	--	--	--	--	--	--
Unigene10664_JingChaoZuZhi2	1913	349	25.1225	gi|307170734|gb|EFN62859.1|	189	7.00E-56	Pre-mRNA-splicing factor Syf2 [Camponotus floridanus]	sp|Q612R3|SYF2_CAEBR	159	2.00E-49	Pre-mRNA-splicing factor syf-2 OS=Caenorhabditis briggsae GN=syf-2 PE=3 SV=2
Unigene10665_JingChaoZuZhi2	375	121	44.433	--	--	--	--	--	--	--	--
Unigene10666_JingChaoZuZhi2	449	21	6.4406	gi|198460025|ref|XP_001361586.2|	168	5.00E-41	GA14897 [Drosophila pseudoobscura pseudoobscura] >gi|198136881|gb|EAL26165.2| GA14897 [Drosophila pseudoobscura pseudoobscura]	sp|P48994|TRPL_DROME	168	1.00E-41	Transient-receptor-potential-like protein OS=Drosophila melanogaster GN=trpl PE=1 SV=2
Unigene10667_JingChaoZuZhi2	483	25	7.1276	--	--	--	--	--	--	--	--
Unigene10668_JingChaoZuZhi2	504	80	21.858	--	--	--	--	--	--	--	--
Unigene10669_JingChaoZuZhi2	533	40	10.3344	gi|261331295|emb|CBH14285.1|	57.8	2.00E-07	T. brucei spp.-specific protein [Trypanosoma brucei gambiense DAL972]	sp|Q69566|U88_HHV6U	58.2	3.00E-08	Uncharacterized protein U88 OS=Human herpesvirus 6A (strain Uganda-1102) GN=U88 PE=4 SV=1
Unigene1066_JingChaoZuZhi2	223	26	16.0554	--	--	--	--	--	--	--	--
Unigene10670_JingChaoZuZhi2	259	14	7.4435	--	--	--	--	--	--	--	--
Unigene10671_JingChaoZuZhi2	273	38	19.1678	--	--	--	--	--	--	--	--
Unigene10672_JingChaoZuZhi2	270	10	5.1002	gi|260804593|ref|XP_002597172.1|	56.2	3.00E-07	hypothetical protein BRAFLDRAFT_66300 [Branchiostoma floridae] >gi|229282435|gb|EEN53184.1| hypothetical protein BRAFLDRAFT_66300 [Branchiostoma floridae]	--	--	--	--
Unigene10673_JingChaoZuZhi2	276	17	8.4819	gi|242019761|ref|XP_002430327.1|	55.8	4.00E-07	glutamate receptor 1 precursor, putative [Pediculus humanus corporis] >gi|212515451|gb|EEB17589.1| glutamate receptor 1 precursor, putative [Pediculus humanus corporis]	sp|P20262|GLRK_RANBE	49.7	6.00E-06	Probable glutamate receptor OS=Rana berlandieri PE=1 SV=1
Unigene10674_JingChaoZuZhi2	825	429	71.6069	--	--	--	--	--	--	--	--
Unigene10675_JingChaoZuZhi2	448	34	10.4509	gi|195041495|ref|XP_001991266.1|	53.9	2.00E-06	GH12151 [Drosophila grimshawi] >gi|193901024|gb|EDV99890.1| GH12151 [Drosophila grimshawi]	sp|Q8H8K7|FH4_ORYSJ	52.4	1.00E-06	Formin-like protein 4 OS=Oryza sativa subsp. japonica GN=FH4 PE=3 SV=1
Unigene10676_JingChaoZuZhi2	307	9	4.037	--	--	--	--	--	--	--	--
Unigene10677_JingChaoZuZhi2	348	25	9.8926	--	--	--	--	--	--	--	--
Unigene10678_JingChaoZuZhi2	696	125	24.7316	gi|156537283|ref|XP_001605940.1|	80.9	2.00E-21	PREDICTED: similar to hsp70 binding protein [Nasonia vitripennis]	--	--	--	--
Unigene10679_JingChaoZuZhi2	1273	143	15.4689	gi|133754273|gb|ABO38431.1|	106	2.00E-21	inhibitor of apoptosis protein [Penaeus monodon]	sp|Q24307|IAP2_DROME	77.4	2.00E-13	Apoptosis 2 inhibitor OS=Drosophila melanogaster GN=Iap2 PE=2 SV=3
Unigene1067_JingChaoZuZhi2	807	125	21.3299	--	--	--	--	--	--	--	--
Unigene10680_JingChaoZuZhi2	319	22	9.4969	--	--	--	--	--	--	--	--
Unigene10681_JingChaoZuZhi2	272	11	5.569	--	--	--	--	--	--	--	--
Unigene10682_JingChaoZuZhi2	975	169	23.869	--	--	--	--	--	--	--	--
Unigene10683_JingChaoZuZhi2	270	14	7.1403	gi|198415971|ref|XP_002126258.1|	72.4	4.00E-12	PREDICTED: similar to transmembrane protein 45b isoform 2 [Ciona intestinalis]	sp|Q6NS09|TM45B_XENLA	63.2	5.00E-10	Transmembrane protein 45B OS=Xenopus laevis GN=tmem45b PE=2 SV=1
Unigene10684_JingChaoZuZhi2	1241	314	34.8425	--	--	--	--	--	--	--	--
Unigene10685_JingChaoZuZhi2	247	20	11.1503	--	--	--	--	--	--	--	--
Unigene10686_JingChaoZuZhi2	256	24	12.9099	--	--	--	--	--	--	--	--
Unigene10687_JingChaoZuZhi2	273	16	8.0707	gi|74865845|sp|Q8MP30.1|Y7791_DICDI	55.5	6.00E-07	RecName: Full=Uncharacterized histidine-rich protein DDB_G0274557; Flags: Precursor	sp|Q8MP30|Y7791_DICDI	55.5	1.00E-07	Uncharacterized histidine-rich protein DDB_G0274557 OS=Dictyostelium discoideum GN=DDB_G0274557 PE=4 SV=1
Unigene10688_JingChaoZuZhi2	255	11	5.9402	--	--	--	--	--	--	--	--
Unigene10689_JingChaoZuZhi2	540	35	8.9254	gi|195116485|ref|XP_002002785.1|	60.8	2.00E-08	GI17572 [Drosophila mojavensis] >gi|193913360|gb|EDW12227.1| GI17572 [Drosophila mojavensis]	sp|Q55CW2|SAMKC_DICDI	54.3	4.00E-07	Probable serine/threonine-protein kinase samkC OS=Dictyostelium discoideum GN=samkC PE=3 SV=2
Unigene1068_JingChaoZuZhi2	228	10	6.0397	--	--	--	--	--	--	--	--
Unigene10690_JingChaoZuZhi2	350	26	10.2296	--	--	--	--	--	--	--	--
Unigene10691_JingChaoZuZhi2	299	37	17.0405	--	--	--	--	--	--	--	--
Unigene10692_JingChaoZuZhi2	476	70	20.2508	--	--	--	--	--	--	--	--
Unigene10693_JingChaoZuZhi2	272	8	4.0502	gi|261331295|emb|CBH14285.1|	60.5	2.00E-08	T. brucei spp.-specific protein [Trypanosoma brucei gambiense DAL972]	sp|Q69566|U88_HHV6U	60.1	4.00E-09	Uncharacterized protein U88 OS=Human herpesvirus 6A (strain Uganda-1102) GN=U88 PE=4 SV=1
Unigene10694_JingChaoZuZhi2	449	22	6.7473	gi|90093316|ref|NP_001035011.1|	57.4	2.00E-07	solute carrier family 43 member 3 [Danio rerio] >gi|89130558|gb|AAI14301.1| Zgc:136890 [Danio rerio]	sp|A2AVZ9|S43A3_MOUSE	55.5	1.00E-07	Solute carrier family 43 member 3 OS=Mus musculus GN=Slc43a3 PE=2 SV=1
Unigene10695_JingChaoZuZhi2	1277	167	18.0085	gi|195401218|ref|XP_002059211.1|	59.3	3.00E-07	GJ16154 [Drosophila virilis] >gi|194156085|gb|EDW71269.1| GJ16154 [Drosophila virilis]	sp|Q5H9S7|DCA17_HUMAN	56.2	5.00E-07	DDB1- and CUL4-associated factor 17 OS=Homo sapiens GN=DCAF17 PE=1 SV=1
Unigene10696_JingChaoZuZhi2	271	13	6.6058	--	--	--	--	--	--	--	--
Unigene10697_JingChaoZuZhi2	290	30	14.2454	--	--	--	--	--	--	--	--
Unigene10698_JingChaoZuZhi2	376	18	6.5923	gi|307202188|gb|EFN81675.1|	135	6.00E-31	Uncharacterized protein KIAA1409 [Harpegnathos saltator]	sp|Q0KK59|UNC79_MOUSE	85.5	9.00E-17	Protein unc-79 homolog OS=Mus musculus GN=Kiaa1409 PE=1 SV=1
Unigene10699_JingChaoZuZhi2	290	15	7.1227	--	--	--	--	--	--	--	--
Unigene1069_JingChaoZuZhi2	429	8	2.5679	--	--	--	--	--	--	--	--
Unigene106_JingChaoZuZhi2	367	79	29.6424	--	--	--	--	--	--	--	--
Unigene10700_JingChaoZuZhi2	867	76	12.0711	--	--	--	--	--	--	--	--
Unigene10701_JingChaoZuZhi2	487	134	37.8903	--	--	--	--	--	--	--	--
Unigene10702_JingChaoZuZhi2	523	65	17.1145	--	--	--	--	--	--	--	--
Unigene10703_JingChaoZuZhi2	592	53	12.3284	--	--	--	--	--	--	--	--
Unigene10704_JingChaoZuZhi2	509	100	27.0542	gi|193695236|ref|XP_001947046.1|	186	3.00E-46	PREDICTED: similar to AGAP005532-PA [Acyrthosiphon pisum]	sp|Q3T0R4|DRS7B_BOVIN	184	2.00E-46	Dehydrogenase/reductase SDR family member 7B OS=Bos taurus GN=DHRS7B PE=2 SV=1
Unigene10705_JingChaoZuZhi2	325	35	14.8298	--	--	--	--	--	--	--	--
Unigene10706_JingChaoZuZhi2	297	28	12.9824	--	--	--	--	--	--	--	--
Unigene10707_JingChaoZuZhi2	277	12	5.9656	--	--	--	--	--	--	--	--
Unigene10708_JingChaoZuZhi2	264	12	6.2593	--	--	--	--	--	--	--	--
Unigene10709_JingChaoZuZhi2	413	37	12.3368	gi|110757646|ref|XP_394624.3|	59.7	4.00E-14	PREDICTED: similar to Caf1-180 CG12109-PB [Apis mellifera]	sp|Q6P5Q4|LMOD2_HUMAN	50.8	3.00E-06	Leiomodin-2 OS=Homo sapiens GN=LMOD2 PE=2 SV=2
Unigene1070_JingChaoZuZhi2	711	295	57.1353	--	--	--	--	--	--	--	--
Unigene10710_JingChaoZuZhi2	386	32	11.416	--	--	--	--	--	--	--	--
Unigene10711_JingChaoZuZhi2	303	13	5.9082	--	--	--	--	--	--	--	--
Unigene10712_JingChaoZuZhi2	470	28	8.2037	gi|195120199|ref|XP_002004616.1|	160	1.00E-49	GI19509 [Drosophila mojavensis] >gi|193909684|gb|EDW08551.1| GI19509 [Drosophila mojavensis]	sp|Q9W107|SYYM_DROME	153	5.00E-49	Probable tyrosyl-tRNA synthetase, mitochondrial OS=Drosophila melanogaster GN=CG16912 PE=2 SV=1
Unigene10713_JingChaoZuZhi2	433	42	13.3571	--	--	--	--	--	--	--	--
Unigene10714_JingChaoZuZhi2	290	13	6.173	--	--	--	--	--	--	--	--
Unigene10715_JingChaoZuZhi2	598	42	9.6716	--	--	--	--	--	--	--	--
Unigene10716_JingChaoZuZhi2	348	40	15.8282	gi|115752598|ref|XP_001182458.1|	73.9	2.00E-12	PREDICTED: similar to endonuclease-reverse transcriptase [Strongylocentrotus purpuratus] >gi|115929996|ref|XP_001194890.1| PREDICTED: similar to endonuclease-reverse transcriptase [Strongylocentrotus purpuratus]	--	--	--	--
Unigene10717_JingChaoZuZhi2	376	28	10.2547	--	--	--	--	--	--	--	--
Unigene10718_JingChaoZuZhi2	284	16	7.7581	gi|156553500|ref|XP_001600727.1|	58.9	1.00E-15	PREDICTED: similar to MGC115092 protein [Nasonia vitripennis]	sp|Q5ZMR9|XPO4_CHICK	39.3	1.00E-07	Exportin-4 OS=Gallus gallus GN=XPO4 PE=2 SV=1
Unigene10719_JingChaoZuZhi2	281	15	7.3508	--	--	--	--	--	--	--	--
Unigene1071_JingChaoZuZhi2	759	161	29.2103	gi|51467976|ref|NP_001003855.1|	213	4.00E-54	alpha-(1,6)-fucosyltransferase [Danio rerio] >gi|50057055|emb|CAH03675.1| alpha-6-fucosyltransferase [Danio rerio]	sp|Q6NVP8|FUT8_XENTR	210	1.00E-53	Alpha-(1,6)-fucosyltransferase OS=Xenopus tropicalis GN=fut8 PE=2 SV=1
Unigene10720_JingChaoZuZhi2	268	8	4.1106	--	--	--	--	sp|Q7G6K7|FH3_ORYSJ	30.4	4.00E-06	Formin-like protein 3 OS=Oryza sativa subsp. japonica GN=FH3 PE=2 SV=2
Unigene10721_JingChaoZuZhi2	443	102	31.7065	--	--	--	--	--	--	--	--
Unigene10722_JingChaoZuZhi2	338	29	11.815	--	--	--	--	--	--	--	--
Unigene10723_JingChaoZuZhi2	1093	145	18.2684	gi|125804386|ref|XP_699710.2|	145	3.00E-33	PREDICTED: Na[+]/H[+] hydrogen antiporter 1-like [Danio rerio]	sp|Q5R6B8|NHDC2_PONAB	133	2.00E-30	Mitochondrial sodium/hydrogen exchanger NHA2 OS=Pongo abelii GN=NHEDC2 PE=2 SV=1
Unigene10724_JingChaoZuZhi2	535	52	13.3845	--	--	--	--	--	--	--	--
Unigene10725_JingChaoZuZhi2	368	22	8.2324	--	--	--	--	--	--	--	--
Unigene10726_JingChaoZuZhi2	262	14	7.3583	--	--	--	--	--	--	--	--
Unigene10727_JingChaoZuZhi2	281	13	6.3707	--	--	--	--	--	--	--	--
Unigene10728_JingChaoZuZhi2	369	48	17.9129	gi|301622436|ref|XP_002940534.1|	52.4	5.00E-06	PREDICTED: uncharacterized protein C15orf57 homolog [Xenopus (Silurana) tropicalis]	--	--	--	--
Unigene10729_JingChaoZuZhi2	275	12	6.009	gi|73967381|ref|XP_537773.2|	181	9.00E-45	PREDICTED: similar to RUN and TBC1 domain containing 1 [Canis familiaris]	sp|O43147|SGSM2_HUMAN	179	4.00E-45	Small G protein signaling modulator 2 OS=Homo sapiens GN=SGSM2 PE=1 SV=4
Unigene1072_JingChaoZuZhi2	226	11	6.7025	gi|156551463|ref|XP_001604831.1|	63.2	3.00E-09	PREDICTED: similar to CG32705-PA [Nasonia vitripennis]	sp|P49756|RBM25_HUMAN	62	1.00E-09	RNA-binding protein 25 OS=Homo sapiens GN=RBM25 PE=1 SV=3
Unigene10730_JingChaoZuZhi2	273	6	3.0265	--	--	--	--	--	--	--	--
Unigene10731_JingChaoZuZhi2	798	48	8.283	--	--	--	--	--	--	--	--
Unigene10732_JingChaoZuZhi2	1040	126	16.6836	--	--	--	--	--	--	--	--
Unigene10733_JingChaoZuZhi2	1926	358	25.5964	gi|308468215|ref|XP_003096351.1|	66.6	3.00E-09	CRE-PQN-75 protein [Caenorhabditis remanei] >gi|308243266|gb|EFO87218.1| CRE-PQN-75 protein [Caenorhabditis remanei]	sp|A3AB67|FH16_ORYSJ	57.4	4.00E-07	Formin-like protein 16 OS=Oryza sativa subsp. japonica GN=FH16 PE=2 SV=1
Unigene10734_JingChaoZuZhi2	519	73	19.369	gi|1480863|gb|AAB05810.1|	76.6	4.00E-13	super cysteine rich protein [Homo sapiens]	sp|P60905|DNJC5_RAT	51.6	3.00E-06	DnaJ homolog subfamily C member 5 OS=Rattus norvegicus GN=Dnajc5 PE=1 SV=1
Unigene10735_JingChaoZuZhi2	418	34	11.2009	gi|291229286|ref|XP_002734606.1|	63.2	3.00E-09	PREDICTED: will die slowly-like [Saccoglossus kowalevskii]	sp|Q6ZQL4|WDR43_MOUSE	52.8	7.00E-07	WD repeat-containing protein 43 OS=Mus musculus GN=Wdr43 PE=1 SV=2
Unigene10736_JingChaoZuZhi2	337	37	15.119	gi|153792006|ref|NP_001093496.1|	93.6	2.00E-18	DNA polymerase nu [Danio rerio] >gi|108735435|gb|ABG00195.1| DNA polymerase nu [Danio rerio]	sp|Q7Z5Q5|DPOLN_HUMAN	88.6	1.00E-17	DNA polymerase nu OS=Homo sapiens GN=POLN PE=1 SV=2
Unigene10737_JingChaoZuZhi2	966	160	22.8084	--	--	--	--	--	--	--	--
Unigene10738_JingChaoZuZhi2	297	18	8.3458	gi|195385693|ref|XP_002051539.1|	64.3	1.00E-09	GJ16112 [Drosophila virilis] >gi|194147996|gb|EDW63694.1| GJ16112 [Drosophila virilis]	--	--	--	--
Unigene10739_JingChaoZuZhi2	409	17	5.7237	--	--	--	--	--	--	--	--
Unigene1073_JingChaoZuZhi2	260	27	14.3002	--	--	--	--	--	--	--	--
Unigene10740_JingChaoZuZhi2	338	16	6.5186	gi|115695312|ref|XP_001199139.1|	151	8.00E-36	PREDICTED: similar to MGC80481 protein [Strongylocentrotus purpuratus] >gi|115740951|ref|XP_791145.2| PREDICTED: similar to MGC80481 protein [Strongylocentrotus purpuratus]	sp|P85107|TGS1_RAT	128	1.00E-29	Trimethylguanosine synthase OS=Rattus norvegicus GN=Tgs1 PE=1 SV=1
Unigene10741_JingChaoZuZhi2	436	40	12.6335	gi|291225093|ref|XP_002732536.1|	71.2	1.00E-11	PREDICTED: bromodomain adjacent to zinc finger domain, 1B-like [Saccoglossus kowalevskii]	sp|Q5SPL2|PHF12_MOUSE	51.6	2.00E-06	PHD finger protein 12 OS=Mus musculus GN=Phf12 PE=2 SV=1
Unigene10742_JingChaoZuZhi2	559	81	19.9538	--	--	--	--	--	--	--	--
Unigene10743_JingChaoZuZhi2	827	136	22.6457	--	--	--	--	--	--	--	--
Unigene10744_JingChaoZuZhi2	549	36	9.0299	--	--	--	--	--	--	--	--
Unigene10745_JingChaoZuZhi2	761	99	17.9144	gi|133754271|gb|ABO38430.1|	167	5.00E-40	effector caspase [Penaeus monodon]	sp|O01382|ICE_DROME	135	2.00E-35	Caspase OS=Drosophila melanogaster GN=Ice PE=1 SV=2
Unigene10746_JingChaoZuZhi2	257	25	13.3955	--	--	--	--	--	--	--	--
Unigene10747_JingChaoZuZhi2	393	18	6.3071	gi|293343922|ref|XP_001078719.2|	66.2	3.00E-10	PREDICTED: rCG54054-like [Rattus norvegicus]	sp|Q55FI4|NOP58_DICDI	55.8	8.00E-08	Nucleolar protein 58 OS=Dictyostelium discoideum GN=nop58 PE=3 SV=1
Unigene10748_JingChaoZuZhi2	325	19	8.0505	--	--	--	--	--	--	--	--
Unigene10749_JingChaoZuZhi2	4112	1504	50.367	gi|91091508|ref|XP_969167.1|	225	1.00E-56	PREDICTED: similar to lipocalin-1 interacting membrane receptor (limr) [Tribolium castaneum]	sp|Q9D1E5|LMBRL_MOUSE	197	7.00E-49	Protein LMBR1L OS=Mus musculus GN=Lmbr1l PE=2 SV=1
Unigene1074_JingChaoZuZhi2	404	82	27.9502	--	--	--	--	--	--	--	--
Unigene10750_JingChaoZuZhi2	257	20	10.7164	--	--	--	--	--	--	--	--
Unigene10751_JingChaoZuZhi2	346	102	40.5953	gi|298204347|gb|ADI61822.1|	55.8	4.00E-07	endonuclease-reverse transcriptase [Bombyx mori]	--	--	--	--
Unigene10752_JingChaoZuZhi2	1571	318	27.8742	gi|170589021|ref|XP_001899272.1|	55.1	8.00E-06	hypothetical protein [Brugia malayi] >gi|158593485|gb|EDP32080.1| conserved hypothetical protein [Brugia malayi]	--	--	--	--
Unigene10753_JingChaoZuZhi2	355	89	34.5234	--	--	--	--	--	--	--	--
Unigene10754_JingChaoZuZhi2	484	74	21.0542	--	--	--	--	--	--	--	--
Unigene10755_JingChaoZuZhi2	579	31	7.3728	gi|307185234|gb|EFN71361.1|	196	5.00E-49	RING finger and SPRY domain-containing protein 1 [Camponotus floridanus]	sp|Q5R881|RSPRY_PONAB	172	1.00E-42	RING finger and SPRY domain-containing protein 1 OS=Pongo abelii GN=RSPRY1 PE=2 SV=1
Unigene10756_JingChaoZuZhi2	469	26	7.634	--	--	--	--	--	--	--	--
Unigene10757_JingChaoZuZhi2	638	35	7.5544	--	--	--	--	--	--	--	--
Unigene10758_JingChaoZuZhi2	1152	139	16.6155	gi|158286603|ref|XP_308831.4|	94.4	8.00E-18	cuticular protein 111, RR-3 family (AGAP006931-PA) [Anopheles gambiae str. PEST] >gi|157020547|gb|EAA04403.4| cuticular protein 111, RR-3 family (AGAP006931-PA) [Anopheles gambiae str. PEST]	sp|P82119|CUO6_BLACR	90.5	2.00E-17	Cuticle protein 6 OS=Blaberus craniifer PE=1 SV=1
Unigene10759_JingChaoZuZhi2	446	89	27.4794	--	--	--	--	--	--	--	--
Unigene1075_JingChaoZuZhi2	951	181	26.209	gi|66509272|ref|XP_624242.1|	519	1.00E-146	PREDICTED: similar to Protein phosphatase D3 CG8402-PA, isoform A [Apis mellifera]	sp|P53041|PPP5_HUMAN	459	1.00E-128	Serine/threonine-protein phosphatase 5 OS=Homo sapiens GN=PPP5C PE=1 SV=1
Unigene10760_JingChaoZuZhi2	586	55	12.9246	gi|91092820|ref|XP_967695.1|	262	6.00E-69	PREDICTED: similar to parvin [Tribolium castaneum]	sp|Q9ES46|PARVB_MOUSE	199	1.00E-50	Beta-parvin OS=Mus musculus GN=Parvb PE=1 SV=1
Unigene10761_JingChaoZuZhi2	319	28	12.087	--	--	--	--	--	--	--	--
Unigene10762_JingChaoZuZhi2	1344	216	22.1313	gi|156543126|ref|XP_001605599.1|	118	5.00E-25	PREDICTED: similar to HLA-B associated transcript-2 [Nasonia vitripennis]	sp|Q9FLQ7|FH20_ARATH	67.8	4.00E-18	Formin-like protein 20 OS=Arabidopsis thaliana GN=FH20 PE=2 SV=2
Unigene10763_JingChaoZuZhi2	492	26	7.2771	gi|55979206|gb|AAV69062.1|	161	9.00E-39	alkaline phosphatase [Pinctada fucata]	sp|P29523|PPB_BOMMO	146	7.00E-35	Membrane-bound alkaline phosphatase OS=Bombyx mori GN=Alp-m PE=1 SV=3
Unigene10764_JingChaoZuZhi2	414	58	19.2921	--	--	--	--	--	--	--	--
Unigene10765_JingChaoZuZhi2	475	15	4.3486	gi|193624646|ref|XP_001952092.1|	165	3.00E-49	PREDICTED: similar to muscle myosin heavy chain isoform 1 [Acyrthosiphon pisum]	sp|P05661|MYSA_DROME	166	5.00E-49	Myosin heavy chain, muscle OS=Drosophila melanogaster GN=Mhc PE=1 SV=4
Unigene10766_JingChaoZuZhi2	445	27	8.3552	--	--	--	--	--	--	--	--
Unigene10767_JingChaoZuZhi2	425	51	16.5247	--	--	--	--	--	--	--	--
Unigene10768_JingChaoZuZhi2	262	20	10.5119	--	--	--	--	--	--	--	--
Unigene10769_JingChaoZuZhi2	275	16	8.012	gi|297678602|ref|XP_002817156.1|	83.2	3.00E-15	PREDICTED: 5'-nucleotidase-like isoform 1 [Pongo abelii]	sp|P21589|5NTD_HUMAN	83.2	5.00E-16	5'-nucleotidase OS=Homo sapiens GN=NT5E PE=1 SV=1
Unigene1076_JingChaoZuZhi2	231	34	20.2684	--	--	--	--	--	--	--	--
Unigene10770_JingChaoZuZhi2	399	14	4.8318	gi|91084625|ref|XP_974579.1|	82.8	2.00E-24	PREDICTED: similar to cullin [Tribolium castaneum]	sp|Q5RCF3|CUL2_PONAB	86.7	1.00E-23	Cullin-2 OS=Pongo abelii GN=CUL2 PE=2 SV=1
Unigene10771_JingChaoZuZhi2	250	4	2.2033	--	--	--	--	--	--	--	--
Unigene10772_JingChaoZuZhi2	418	20	6.5888	gi|66522685|ref|XP_391981.2|	69.7	3.00E-11	PREDICTED: similar to CG9867-PA [Apis mellifera]	sp|Q08CY9|AER61_XENTR	53.9	3.00E-07	Uncharacterized glycosyltransferase AER61 OS=Xenopus tropicalis GN=aer61 PE=2 SV=1
Unigene10773_JingChaoZuZhi2	269	33	16.8933	gi|158288293|ref|XP_310169.4|	129	2.00E-29	AGAP009523-PA [Anopheles gambiae str. PEST] >gi|157019180|gb|EAA05922.5| AGAP009523-PA [Anopheles gambiae str. PEST]	sp|Q32LQ6|MFSD1_DANRE	115	8.00E-26	Major facilitator superfamily domain-containing protein 1 OS=Danio rerio GN=mfsd1 PE=2 SV=1
Unigene10774_JingChaoZuZhi2	338	43	17.5188	--	--	--	--	--	--	--	--
Unigene10775_JingChaoZuZhi2	2060	663	44.3198	gi|290560636|ref|NP_001166701.1|	81.6	1.00E-13	cuticular protein RR-1 motif 56 [Bombyx mori]	sp|P03181|BHLF1_EBVB9	55.8	1.00E-06	Uncharacterized protein BHLF1 OS=Epstein-Barr virus (strain B95-8) GN=BHLF1 PE=4 SV=1
Unigene10776_JingChaoZuZhi2	305	26	11.7388	--	--	--	--	--	--	--	--
Unigene10777_JingChaoZuZhi2	374	19	6.9957	--	--	--	--	--	--	--	--
Unigene10778_JingChaoZuZhi2	272	14	7.0878	--	--	--	--	--	--	--	--
Unigene10779_JingChaoZuZhi2	677	59	12.0009	gi|109084304|ref|XP_001093730.1|	101	1.00E-26	PREDICTED: ATP-binding cassette sub-family D member 4 [Macaca mulatta]	sp|O14678|ABCD4_HUMAN	99.8	9.00E-27	ATP-binding cassette sub-family D member 4 OS=Homo sapiens GN=ABCD4 PE=2 SV=1
Unigene1077_JingChaoZuZhi2	382	46	16.5824	--	--	--	--	--	--	--	--
Unigene10780_JingChaoZuZhi2	339	56	22.7478	gi|195350163|ref|XP_002041611.1|	59.7	3.00E-08	GM16758 [Drosophila sechellia] >gi|194123384|gb|EDW45427.1| GM16758 [Drosophila sechellia]	sp|Q5B5B0|PAN1_EMENI	35.8	2.00E-08	Actin cytoskeleton-regulatory complex protein pan1 OS=Emericella nidulans GN=pan1 PE=3 SV=1
Unigene10781_JingChaoZuZhi2	297	9	4.1729	gi|91088437|ref|XP_967999.1|	112	3.00E-24	PREDICTED: similar to alpha1,3-fucosyltransferase B homologue [Tribolium castaneum]	sp|Q9VUL9|FUCTA_DROME	57.4	3.00E-08	Glycoprotein 3-alpha-L-fucosyltransferase A OS=Drosophila melanogaster GN=FucTA PE=1 SV=2
Unigene10782_JingChaoZuZhi2	340	34	13.7706	gi|195127337|ref|XP_002008125.1|	102	3.00E-21	GI13325 [Drosophila mojavensis] >gi|193919734|gb|EDW18601.1| GI13325 [Drosophila mojavensis]	sp|P56079|CDSA_DROME	101	1.00E-21	Phosphatidate cytidylyltransferase, photoreceptor-specific OS=Drosophila melanogaster GN=CdsA PE=1 SV=2
Unigene10783_JingChaoZuZhi2	355	27	10.4734	gi|217416327|ref|NP_001136110.1|	31.6	6.00E-06	huntingtin [Ovis aries] >gi|215276015|gb|ACJ65019.1| huntingtin [Ovis aries]	--	--	--	--
Unigene10784_JingChaoZuZhi2	1054	212	27.6979	gi|309356335|emb|CAP37356.2|	427	1.00E-169	CBR-MEC-12 protein [Caenorhabditis briggsae AF16]	sp|Q94572|TBA3_HOMAM	516	8.00E-146	Tubulin alpha-3 chain OS=Homarus americanus PE=2 SV=1
Unigene10785_JingChaoZuZhi2	338	75	30.556	--	--	--	--	--	--	--	--
Unigene10786_JingChaoZuZhi2	326	28	11.8275	--	--	--	--	--	--	--	--
Unigene10787_JingChaoZuZhi2	477	28	8.0834	--	--	--	--	--	--	--	--
Unigene10788_JingChaoZuZhi2	610	50	11.2873	gi|170040111|ref|XP_001847855.1|	180	6.00E-69	elongation factor G 1, mitochondrial [Culex quinquefasciatus] >gi|261263143|sp|B0WGM1.1|EFGM_CULQU RecName: Full=Elongation factor G, mitochondrial; Short=EF-Gmt; AltName: Full=Elongation factor G 1, mitochondrial; Short=mEF-G 1; AltName: Full=Elongation factor G1; Flags: Precursor >gi|167863667|gb|EDS27050.1| elongation factor G 1, mitochondrial [Culex quinquefasciatus]	sp|B0WGM1|EFGM_CULQU	180	1.00E-69	Elongation factor G, mitochondrial OS=Culex quinquefasciatus GN=CPIJ005834 PE=3 SV=1
Unigene10789_JingChaoZuZhi2	588	62	14.52	--	--	--	--	--	--	--	--
Unigene1078_JingChaoZuZhi2	283	36	17.5173	--	--	--	--	--	--	--	--
Unigene10790_JingChaoZuZhi2	278	8	3.9628	gi|269856283|gb|ACZ51424.1|	104	1.00E-21	GABA-gated ion channel [Nasonia vitripennis]	sp|Q24352|GBRAL_DROME	102	7.00E-22	Gamma-aminobutyric acid receptor alpha-like OS=Drosophila melanogaster GN=Grd PE=1 SV=1
Unigene10791_JingChaoZuZhi2	666	93	19.2292	--	--	--	--	--	--	--	--
Unigene10792_JingChaoZuZhi2	302	16	7.2957	--	--	--	--	--	--	--	--
Unigene10793_JingChaoZuZhi2	973	420	59.4413	--	--	--	--	--	--	--	--
Unigene10794_JingChaoZuZhi2	860	113	18.0939	--	--	--	--	--	--	--	--
Unigene10795_JingChaoZuZhi2	946	153	22.2716	gi|307184648|gb|EFN70977.1|	121	3.00E-26	UNC93-like protein [Camponotus floridanus]	sp|Q9Y115|UN93L_DROME	118	7.00E-26	UNC93-like protein OS=Drosophila melanogaster GN=CG4928 PE=2 SV=1
Unigene10796_JingChaoZuZhi2	1079	276	35.2241	--	--	--	--	--	--	--	--
Unigene10797_JingChaoZuZhi2	422	59	19.2527	--	--	--	--	--	--	--	--
Unigene10798_JingChaoZuZhi2	469	48	14.0935	gi|297374787|ref|NP_001172008.1|	169	3.00E-41	LMBR1 domain-containing protein 2 homolog [Apis mellifera]	sp|Q8C561|LMBD2_MOUSE	130	3.00E-30	LMBR1 domain-containing protein 2 OS=Mus musculus GN=Lmbrd2 PE=2 SV=1
Unigene10799_JingChaoZuZhi2	369	17	6.3442	--	--	--	--	--	--	--	--
Unigene1079_JingChaoZuZhi2	289	155	73.856	--	--	--	--	--	--	--	--
Unigene107_JingChaoZuZhi2	215	128	81.9829	--	--	--	--	--	--	--	--
Unigene10800_JingChaoZuZhi2	605	150	34.1419	gi|241729581|ref|XP_002404605.1|	223	3.00E-57	secreted protein [Ixodes scapularis] >gi|215505493|gb|EEC14987.1| secreted protein [Ixodes scapularis]	sp|Q96EQ0|SGTB_HUMAN	166	8.00E-41	Small glutamine-rich tetratricopeptide repeat-containing protein beta OS=Homo sapiens GN=SGTB PE=1 SV=1
Unigene10801_JingChaoZuZhi2	493	28	7.821	--	--	--	--	--	--	--	--
Unigene10802_JingChaoZuZhi2	3306	456	18.9939	gi|156541670|ref|XP_001602680.1|	582	0	PREDICTED: similar to ENSANGP00000014184 [Nasonia vitripennis]	sp|P54358|DPOD1_DROME	563	0	DNA polymerase delta catalytic subunit OS=Drosophila melanogaster GN=DNApol-delta PE=1 SV=2
Unigene10803_JingChaoZuZhi2	1185	157	18.2445	gi|195429044|ref|XP_002062574.1|	30.4	5.00E-07	GK17614 [Drosophila willistoni] >gi|194158659|gb|EDW73560.1| GK17614 [Drosophila willistoni]	sp|Q84ZL0|FH5_ORYSJ	36.2	8.00E-08	Formin-like protein 5 OS=Oryza sativa subsp. japonica GN=FH5 PE=2 SV=2
Unigene10804_JingChaoZuZhi2	459	38	11.4005	--	--	--	--	--	--	--	--
Unigene10805_JingChaoZuZhi2	668	80	16.4917	--	--	--	--	--	--	--	--
Unigene10806_JingChaoZuZhi2	1046	91	11.9801	gi|307203980|gb|EFN82884.1|	431	1.00E-119	Phosphatidylinositide phosphatase SAC1 [Harpegnathos saltator]	sp|A6QL88|SAC1_BOVIN	421	6.00E-117	Phosphatidylinositide phosphatase SAC1 OS=Bos taurus GN=SACM1L PE=2 SV=1
Unigene10807_JingChaoZuZhi2	309	39	17.3803	--	--	--	--	--	--	--	--
Unigene10808_JingChaoZuZhi2	712	105	20.3077	--	--	--	--	--	--	--	--
Unigene10809_JingChaoZuZhi2	437	18	5.6721	gi|304434841|gb|ADM33449.1|	46.2	6.00E-08	MIP26169p [Drosophila melanogaster]	sp|Q2H922|PAN1_CHAGB	59.7	6.00E-09	Actin cytoskeleton-regulatory complex protein PAN1 OS=Chaetomium globosum GN=PAN1 PE=3 SV=1
Unigene1080_JingChaoZuZhi2	852	249	40.245	gi|307171168|gb|EFN63155.1|	209	1.00E-52	Probable RNA-binding protein 25 [Camponotus floridanus]	sp|P49756|RBM25_HUMAN	176	2.00E-43	RNA-binding protein 25 OS=Homo sapiens GN=RBM25 PE=1 SV=3
Unigene10810_JingChaoZuZhi2	1013	451	61.3082	gi|148224154|ref|NP_001087715.1|	245	2.00E-63	transcriptional adapter 3-B [Xenopus laevis] >gi|82181297|sp|Q66IZ5.1|TAD3B_XENLA RecName: Full=Transcriptional adapter 3-B; AltName: Full=ADA3 homolog B; AltName: Full=Transcriptional adapter 3-like B; Short=ADA3-like protein B >gi|51704039|gb|AAH81129.1| MGC83927 protein [Xenopus laevis]	sp|Q66IZ5|TAD3B_XENLA	245	3.00E-64	Transcriptional adapter 3-B OS=Xenopus laevis GN=tada3-b PE=2 SV=1
Unigene10811_JingChaoZuZhi2	375	28	10.282	--	--	--	--	--	--	--	--
Unigene10812_JingChaoZuZhi2	591	75	17.4753	--	--	--	--	--	--	--	--
Unigene10813_JingChaoZuZhi2	273	15	7.5662	gi|62529860|gb|AAX85202.1|	58.2	9.00E-08	StAR-related lipid transfer domain containing protein [Aedes aegypti]	sp|Q90ZB9|STAR3_SALFO	51.2	2.00E-06	StAR-related lipid transfer protein 3 (Fragment) OS=Salvelinus fontinalis GN=stard3 PE=2 SV=1
Unigene10814_JingChaoZuZhi2	373	24	8.8604	--	--	--	--	--	--	--	--
Unigene10815_JingChaoZuZhi2	312	63	27.8059	--	--	--	--	--	--	--	--
Unigene10816_JingChaoZuZhi2	796	75	12.9748	gi|115935818|ref|XP_001179627.1|	99.8	3.00E-31	PREDICTED: similar to AT-hook-containing transcription factor 1 (Embryonic large molecule derived from yolk sac) [Strongylocentrotus purpuratus]	sp|Q8CJF7|ELYS_MOUSE	84	4.00E-28	Protein ELYS OS=Mus musculus GN=Ahctf1 PE=1 SV=1
Unigene10817_JingChaoZuZhi2	545	82	20.719	gi|307214892|gb|EFN89760.1|	169	5.00E-41	Uncharacterized protein KIAA1688 [Harpegnathos saltator]	sp|P59281|RHG39_MOUSE	155	2.00E-37	Rho GTPase-activating protein 39 OS=Mus musculus GN=Arhgap39 PE=1 SV=2
Unigene10818_JingChaoZuZhi2	777	125	22.1534	--	--	--	--	--	--	--	--
Unigene10819_JingChaoZuZhi2	326	19	8.0258	--	--	--	--	--	--	--	--
Unigene1081_JingChaoZuZhi2	284	25	12.122	--	--	--	--	--	--	--	--
Unigene10820_JingChaoZuZhi2	328	44	18.4727	--	--	--	--	--	--	--	--
Unigene10821_JingChaoZuZhi2	853	49	7.9104	gi|307185289|gb|EFN71389.1|	204	3.00E-51	Uncharacterized protein C18orf8-like protein [Camponotus floridanus]	sp|Q8VC42|MIC1_MOUSE	189	3.00E-47	Uncharacterized protein C18orf8 homolog OS=Mus musculus GN=Mic1 PE=2 SV=1
Unigene10822_JingChaoZuZhi2	275	18	9.0135	--	--	--	--	--	--	--	--
Unigene10823_JingChaoZuZhi2	402	19	6.5085	--	--	--	--	--	--	--	--
Unigene10824_JingChaoZuZhi2	511	34	9.1624	--	--	--	--	--	--	--	--
Unigene10825_JingChaoZuZhi2	673	44	9.003	--	--	--	--	--	--	--	--
Unigene10826_JingChaoZuZhi2	479	60	17.2491	--	--	--	--	--	--	--	--
Unigene10827_JingChaoZuZhi2	1308	185	19.4767	gi|291240295|ref|XP_002740055.1|	322	2.00E-86	PREDICTED: CG6178-like [Saccoglossus kowalevskii]	sp|Q54P77|4CL1_DICDI	262	5.00E-69	Probable 4-coumarate--CoA ligase 1 OS=Dictyostelium discoideum GN=4cl1 PE=3 SV=1
Unigene10828_JingChaoZuZhi2	320	11	4.7336	--	--	--	--	--	--	--	--
Unigene10829_JingChaoZuZhi2	296	10	4.6522	gi|156544564|ref|XP_001602677.1|	65.1	4.00E-17	PREDICTED: similar to n-acetylgalactosaminyltransferase [Nasonia vitripennis]	--	--	--	--
Unigene1082_JingChaoZuZhi2	249	88	48.6671	gi|158292907|ref|XP_314225.4|	128	5.00E-29	AGAP003328-PA [Anopheles gambiae str. PEST] >gi|157016943|gb|EAA09633.4| AGAP003328-PA [Anopheles gambiae str. PEST]	sp|P56556|NDUA6_HUMAN	73.2	5.00E-13	NADH dehydrogenase [ubiquinone] 1 alpha subcomplex subunit 6 OS=Homo sapiens GN=NDUFA6 PE=1 SV=3
Unigene10830_JingChaoZuZhi2	482	31	8.8566	--	--	--	--	--	--	--	--
Unigene10831_JingChaoZuZhi2	793	108	18.7544	gi|305855130|ref|NP_001182307.1|	256	1.00E-109	valyl-tRNA synthetase [Sus scrofa] >gi|162138236|gb|ABX82822.1| valyl-tRNA synthetase [Sus scrofa]	sp|P26640|SYVC_HUMAN	255	2.00E-108	Valyl-tRNA synthetase OS=Homo sapiens GN=VARS PE=1 SV=4
Unigene10832_JingChaoZuZhi2	286	10	4.8149	gi|189236384|ref|XP_969698.2|	57.4	2.00E-07	PREDICTED: similar to SNF1-like kinase 2 [Tribolium castaneum]	--	--	--	--
Unigene10833_JingChaoZuZhi2	262	14	7.3583	gi|292620799|ref|XP_001921238.2|	76.3	3.00E-13	PREDICTED: Gag-Pol polyprotein-like [Danio rerio]	--	--	--	--
Unigene10834_JingChaoZuZhi2	1063	198	25.6498	--	--	--	--	--	--	--	--
Unigene10835_JingChaoZuZhi2	626	32	7.0393	gi|154413468|ref|XP_001579764.1|	74.3	3.00E-12	viral A-type inclusion protein [Trichomonas vaginalis G3]	sp|P35458|DCTN1_CHICK	63.2	1.00E-09	Dynactin subunit 1 OS=Gallus gallus GN=DCTN1 PE=2 SV=2
Unigene10836_JingChaoZuZhi2	345	32	12.7727	--	--	--	--	--	--	--	--
Unigene10837_JingChaoZuZhi2	498	58	16.038	--	--	--	--	--	--	--	--
Unigene10838_JingChaoZuZhi2	305	14	6.3209	--	--	--	--	--	--	--	--
Unigene10839_JingChaoZuZhi2	289	14	6.6709	--	--	--	--	--	--	--	--
Unigene1083_JingChaoZuZhi2	268	9	4.6244	--	--	--	--	--	--	--	--
Unigene10840_JingChaoZuZhi2	337	18	7.3552	--	--	--	--	--	--	--	--
Unigene10841_JingChaoZuZhi2	858	127	20.383	--	--	--	--	--	--	--	--
Unigene10842_JingChaoZuZhi2	291	13	6.1518	--	--	--	--	--	--	--	--
Unigene10843_JingChaoZuZhi2	607	51	11.57	gi|258597185|ref|XP_001347711.2|	79.3	8.00E-14	Plasmodium exported protein [Plasmodium falciparum 3D7] >gi|254832585|gb|AAN35624.2| Plasmodium exported protein [Plasmodium falciparum 3D7]	sp|P36044|MNN4_YEAST	73.2	1.00E-12	Protein MNN4 OS=Saccharomyces cerevisiae GN=MNN4 PE=2 SV=2
Unigene10844_JingChaoZuZhi2	291	31	14.6697	--	--	--	--	--	--	--	--
Unigene10845_JingChaoZuZhi2	315	14	6.1203	--	--	--	--	--	--	--	--
Unigene10846_JingChaoZuZhi2	410	67	22.5031	gi|156552139|ref|XP_001605562.1|	130	1.00E-36	PREDICTED: similar to ENSANGP00000018366 [Nasonia vitripennis]	sp|Q7YU24|MARF_DROME	122	7.00E-37	Transmembrane GTPase Marf OS=Drosophila melanogaster GN=Marf PE=1 SV=1
Unigene10847_JingChaoZuZhi2	578	165	39.3104	gi|170029842|ref|XP_001842800.1|	205	7.00E-52	erythrocyte band 7 integral membrane protein [Culex quinquefasciatus] >gi|167864782|gb|EDS28165.1| erythrocyte band 7 integral membrane protein [Culex quinquefasciatus]	sp|Q99JB2|STML2_MOUSE	183	7.00E-46	Stomatin-like protein 2 OS=Mus musculus GN=Stoml2 PE=1 SV=1
Unigene10848_JingChaoZuZhi2	312	29	12.7996	--	--	--	--	--	--	--	--
Unigene10849_JingChaoZuZhi2	777	79	14.001	gi|291390978|ref|XP_002712008.1|	46.6	3.00E-09	PREDICTED: zinc finger protein 746 [Oryctolagus cuniculus]	sp|Q6NUN9|ZN746_HUMAN	46.6	5.00E-08	Zinc finger protein 746 OS=Homo sapiens GN=ZNF746 PE=2 SV=1
Unigene1084_JingChaoZuZhi2	522	93	24.5338	--	--	--	--	--	--	--	--
Unigene10850_JingChaoZuZhi2	327	27	11.3702	gi|37790758|gb|AAR03485.1|	60.8	1.00E-08	prostaglandin E2 receptor EP3A subtype [Canis lupus familiaris]	sp|P46069|PE2R3_RABIT	58.9	9.00E-09	Prostaglandin E2 receptor EP3 subtype OS=Oryctolagus cuniculus GN=PTGER3 PE=2 SV=1
Unigene10851_JingChaoZuZhi2	294	26	12.1781	--	--	--	--	--	--	--	--
Unigene10852_JingChaoZuZhi2	351	15	5.8849	--	--	--	--	--	--	--	--
Unigene10853_JingChaoZuZhi2	658	98	20.5094	--	--	--	--	--	--	--	--
Unigene10854_JingChaoZuZhi2	284	16	7.7581	--	--	--	--	--	--	--	--
Unigene10855_JingChaoZuZhi2	394	42	14.6793	--	--	--	--	--	--	--	--
Unigene10856_JingChaoZuZhi2	270	19	9.6904	gi|307177140|gb|EFN66373.1|	133	2.00E-30	Serine/threonine-protein kinase 11 [Camponotus floridanus]	sp|Q91604|STK11_XENLA	131	1.00E-30	Serine/threonine-protein kinase 11 OS=Xenopus laevis GN=stk11 PE=1 SV=1
Unigene10857_JingChaoZuZhi2	526	36	9.4247	gi|74865845|sp|Q8MP30.1|Y7791_DICDI	63.5	3.00E-09	RecName: Full=Uncharacterized histidine-rich protein DDB_G0274557; Flags: Precursor	sp|Q8MP30|Y7791_DICDI	63.5	7.00E-10	Uncharacterized histidine-rich protein DDB_G0274557 OS=Dictyostelium discoideum GN=DDB_G0274557 PE=4 SV=1
Unigene10858_JingChaoZuZhi2	270	7	3.5701	gi|301756863|ref|XP_002914279.1|	85.9	2.00E-31	PREDICTED: probable E3 ubiquitin-protein ligase HERC1-like [Ailuropoda melanoleuca]	sp|Q15751|HERC1_HUMAN	85.9	4.00E-32	Probable E3 ubiquitin-protein ligase HERC1 OS=Homo sapiens GN=HERC1 PE=1 SV=2
Unigene10859_JingChaoZuZhi2	330	8	3.3383	--	--	--	--	--	--	--	--
Unigene1085_JingChaoZuZhi2	660	105	21.9077	gi|189237255|ref|XP_972068.2|	198	1.00E-49	PREDICTED: similar to AGAP003656-PA [Tribolium castaneum]	sp|P98160|PGBM_HUMAN	107	9.00E-23	Basement membrane-specific heparan sulfate proteoglycan core protein OS=Homo sapiens GN=HSPG2 PE=1 SV=3
Unigene10860_JingChaoZuZhi2	530	120	31.1786	gi|211970665|emb|CAA19460.2|	85.9	6.00E-16	C. elegans protein Y17G7B.13, partially confirmed by transcript evidence [Caenorhabditis elegans]	sp|Q9H8X2|IPPK_HUMAN	64.7	3.00E-10	Inositol-pentakisphosphate 2-kinase OS=Homo sapiens GN=IPPK PE=1 SV=1
Unigene10861_JingChaoZuZhi2	265	11	5.7161	--	--	--	--	--	--	--	--
Unigene10862_JingChaoZuZhi2	342	16	6.4424	--	--	--	--	--	--	--	--
Unigene10863_JingChaoZuZhi2	838	40	6.5731	gi|301621195|ref|XP_002939936.1|	70.5	7.00E-11	PREDICTED: zinc finger protein 729-like [Xenopus (Silurana) tropicalis]	sp|O88553|ZFP37_RAT	67	2.00E-10	Zinc finger protein 37 OS=Rattus norvegicus GN=Zfp37 PE=2 SV=1
Unigene10864_JingChaoZuZhi2	362	8	3.0432	--	--	--	--	--	--	--	--
Unigene10865_JingChaoZuZhi2	526	122	31.9393	--	--	--	--	--	--	--	--
Unigene10866_JingChaoZuZhi2	308	9	4.0239	--	--	--	--	--	--	--	--
Unigene10867_JingChaoZuZhi2	309	24	10.6956	--	--	--	--	--	--	--	--
Unigene10868_JingChaoZuZhi2	333	21	8.6841	gi|198432951|ref|XP_002127989.1|	53.9	2.00E-06	PREDICTED: similar to CDKN1A interacting zinc finger protein 1 [Ciona intestinalis]	sp|Q52KI8|SRRM1_MOUSE	45.4	2.00E-06	Serine/arginine repetitive matrix protein 1 OS=Mus musculus GN=Srrm1 PE=1 SV=1
Unigene10869_JingChaoZuZhi2	299	21	9.6716	--	--	--	--	--	--	--	--
Unigene1086_JingChaoZuZhi2	182	11	8.3229	--	--	--	--	--	--	--	--
Unigene10870_JingChaoZuZhi2	289	10	4.7649	--	--	--	--	--	--	--	--
Unigene10871_JingChaoZuZhi2	731	118	22.2288	--	--	--	--	--	--	--	--
Unigene10872_JingChaoZuZhi2	286	21	10.1113	gi|268578395|ref|XP_002644180.1|	53.5	2.00E-06	Hypothetical protein CBG17156 [Caenorhabditis briggsae]	--	--	--	--
Unigene10873_JingChaoZuZhi2	311	13	5.7562	gi|193613001|ref|XP_001952572.1|	70.1	2.00E-11	PREDICTED: similar to Y54G2A.42 [Acyrthosiphon pisum]	--	--	--	--
Unigene10874_JingChaoZuZhi2	588	38	8.8993	--	--	--	--	--	--	--	--
Unigene10875_JingChaoZuZhi2	574	42	10.076	--	--	--	--	--	--	--	--
Unigene10876_JingChaoZuZhi2	2405	370	21.1855	gi|189235955|ref|XP_001809336.1|	294	4.00E-86	PREDICTED: similar to Ank2 CG34416-PI [Tribolium castaneum]	sp|O94317|YH5D_SCHPO	66.6	8.00E-10	Uncharacterized serine-rich protein C215.13 OS=Schizosaccharomyces pombe GN=SPBC215.13 PE=1 SV=1
Unigene10877_JingChaoZuZhi2	276	27	13.4712	--	--	--	--	--	--	--	--
Unigene10878_JingChaoZuZhi2	1238	212	23.5813	gi|301777886|ref|XP_002924355.1|	72.8	3.00E-18	PREDICTED: anaphase-promoting complex subunit 1-like [Ailuropoda melanoleuca]	sp|P53995|APC1_MOUSE	73.2	1.00E-18	Anaphase-promoting complex subunit 1 OS=Mus musculus GN=Anapc1 PE=1 SV=1
Unigene10879_JingChaoZuZhi2	489	37	10.4194	gi|293341841|ref|XP_002725067.1|	52.4	6.00E-06	PREDICTED: hypothetical protein [Rattus norvegicus]	--	--	--	--
Unigene1087_JingChaoZuZhi2	246	14	7.8369	gi|307197844|gb|EFN78955.1|	56.6	3.00E-07	hypothetical protein EAI_12227 [Harpegnathos saltator]	--	--	--	--
Unigene10880_JingChaoZuZhi2	653	167	35.2172	--	--	--	--	--	--	--	--
Unigene10881_JingChaoZuZhi2	308	25	11.1774	--	--	--	--	--	--	--	--
Unigene10882_JingChaoZuZhi2	314	81	35.5228	--	--	--	--	--	--	--	--
Unigene10883_JingChaoZuZhi2	254	13	7.0479	gi|193713801|ref|XP_001948275.1|	119	2.00E-26	PREDICTED: similar to DNA-directed RNA polymerase II 140 kDa polypeptide [Acyrthosiphon pisum]	sp|Q8CFI7|RPB2_MOUSE	114	1.00E-25	DNA-directed RNA polymerase II subunit RPB2 OS=Mus musculus GN=Polr2b PE=2 SV=2
Unigene10884_JingChaoZuZhi2	309	23	10.2499	gi|307204038|gb|EFN82942.1|	90.9	1.00E-17	Zinc finger protein Xfin [Harpegnathos saltator]	sp|Q7M732|RTL1_MOUSE	80.9	2.00E-15	Retrotransposon-like protein 1 OS=Mus musculus GN=Rtl1 PE=2 SV=1
Unigene10885_JingChaoZuZhi2	326	107	45.1979	--	--	--	--	--	--	--	--
Unigene10886_JingChaoZuZhi2	420	25	8.1968	--	--	--	--	--	--	--	--
Unigene10887_JingChaoZuZhi2	280	14	6.8853	gi|221502126|gb|EEE27870.1|	54.3	1.00E-06	glycine-rich RNA-binding protein, putative [Toxoplasma gondii VEG]	--	--	--	--
Unigene10888_JingChaoZuZhi2	813	110	18.6318	gi|198463339|ref|XP_002135479.1|	112	2.00E-23	GA28568 [Drosophila pseudoobscura pseudoobscura] >gi|198151215|gb|EDY74106.1| GA28568 [Drosophila pseudoobscura pseudoobscura]	sp|Q9SN46|LRX5_ARATH	89.4	3.00E-17	Leucine-rich repeat extensin-like protein 5 OS=Arabidopsis thaliana GN=LRX5 PE=2 SV=2
Unigene10889_JingChaoZuZhi2	318	19	8.2277	--	--	--	--	--	--	--	--
Unigene1088_JingChaoZuZhi2	310	9	3.9979	gi|261331295|emb|CBH14285.1|	60.1	2.00E-08	T. brucei spp.-specific protein [Trypanosoma brucei gambiense DAL972]	sp|Q69566|U88_HHV6U	57.4	3.00E-08	Uncharacterized protein U88 OS=Human herpesvirus 6A (strain Uganda-1102) GN=U88 PE=4 SV=1
Unigene10890_JingChaoZuZhi2	330	13	5.4248	--	--	--	--	--	--	--	--
Unigene10891_JingChaoZuZhi2	2341	543	31.9411	gi|49457168|emb|CAE51341.1|	76.3	5.00E-12	Phagocytosis 2 [Dictyostelium discoideum]	sp|Q54QQ1|PHG2_DICDI	76.3	1.00E-12	Serine/threonine-protein kinase phg2 OS=Dictyostelium discoideum GN=phg2 PE=1 SV=1
Unigene10892_JingChaoZuZhi2	553	155	38.5974	--	--	--	--	--	--	--	--
Unigene10893_JingChaoZuZhi2	254	13	7.0479	--	--	--	--	--	--	--	--
Unigene10894_JingChaoZuZhi2	393	31	10.8623	--	--	--	--	--	--	--	--
Unigene10895_JingChaoZuZhi2	266	32	16.5661	gi|110765384|ref|XP_001122269.1|	84	1.00E-15	PREDICTED: similar to DNA (cytosine-5-)-methyltransferase 1 [Apis mellifera]	sp|Q27746|DNMT1_PARLI	77	3.00E-14	DNA (cytosine-5)-methyltransferase PliMCI OS=Paracentrotus lividus GN=DNMT PE=2 SV=1
Unigene10896_JingChaoZuZhi2	968	167	23.7571	gi|224613482|gb|ACN60320.1|	127	5.00E-28	Zinc finger CCHC domain-containing protein 6 [Salmo salar]	sp|Q5VYS8|TUT7_HUMAN	121	6.00E-27	Terminal uridylyltransferase 7 OS=Homo sapiens GN=ZCCHC6 PE=1 SV=1
Unigene10897_JingChaoZuZhi2	248	11	6.1079	--	--	--	--	--	--	--	--
Unigene10898_JingChaoZuZhi2	471	55	16.0803	gi|307196729|gb|EFN78188.1|	93.2	3.00E-18	Erythroid differentiation-related factor 1 [Harpegnathos saltator]	--	--	--	--
Unigene10899_JingChaoZuZhi2	364	62	23.4554	--	--	--	--	--	--	--	--
Unigene1089_JingChaoZuZhi2	950	215	31.165	gi|268557034|ref|XP_002636506.1|	55.1	4.00E-06	Hypothetical protein CBG23181 [Caenorhabditis briggsae]	--	--	--	--
Unigene108_JingChaoZuZhi2	1682	236	19.3214	gi|258597185|ref|XP_001347711.2|	58.5	8.00E-07	Plasmodium exported protein [Plasmodium falciparum 3D7] >gi|254832585|gb|AAN35624.2| Plasmodium exported protein [Plasmodium falciparum 3D7]	sp|Q9FLQ7|FH20_ARATH	31.6	6.00E-07	Formin-like protein 20 OS=Arabidopsis thaliana GN=FH20 PE=2 SV=2
Unigene10900_JingChaoZuZhi2	1189	318	36.8296	gi|34099638|gb|AAQ57129.1|	68.9	1.00E-22	endonuclease and reverse transcriptase-like protein [Bombyx mori]	--	--	--	--
Unigene10901_JingChaoZuZhi2	671	46	9.4403	gi|113671417|ref|NP_001038772.1|	174	3.00E-83	acyl-CoA dehydrogenase family member 9, mitochondrial [Danio rerio] >gi|108742117|gb|AAI17590.1| Zgc:136367 [Danio rerio] >gi|182891452|gb|AAI64553.1| Zgc:136367 protein [Danio rerio]	sp|Q8JZN5|ACAD9_MOUSE	147	2.00E-72	Acyl-CoA dehydrogenase family member 9, mitochondrial OS=Mus musculus GN=Acad9 PE=2 SV=1
Unigene10902_JingChaoZuZhi2	286	12	5.7779	--	--	--	--	--	--	--	--
Unigene10903_JingChaoZuZhi2	437	133	41.9104	--	--	--	--	--	--	--	--
Unigene10904_JingChaoZuZhi2	547	23	5.7902	gi|195119532|ref|XP_002004285.1|	52.4	4.00E-09	GI19695 [Drosophila mojavensis] >gi|193909353|gb|EDW08220.1| GI19695 [Drosophila mojavensis]	--	--	--	--
Unigene10905_JingChaoZuZhi2	810	62	10.5404	gi|148747476|ref|NP_001092050.1|	55.1	3.00E-13	basic proline-rich protein [Sus scrofa] >gi|15145793|gb|AAK61381.1| basic proline-rich protein [Sus scrofa]	sp|Q0PHV7|DACT3_MOUSE	64.7	9.00E-14	Dapper homolog 3 OS=Mus musculus GN=Dact3 PE=2 SV=1
Unigene10906_JingChaoZuZhi2	360	24	9.1804	--	--	--	--	--	--	--	--
Unigene10907_JingChaoZuZhi2	351	46	18.0469	--	--	--	--	--	--	--	--
Unigene10908_JingChaoZuZhi2	303	23	10.4529	--	--	--	--	--	--	--	--
Unigene10909_JingChaoZuZhi2	315	12	5.2459	--	--	--	--	--	--	--	--
Unigene1090_JingChaoZuZhi2	275	18	9.0135	--	--	--	--	--	--	--	--
Unigene10910_JingChaoZuZhi2	572	31	7.4631	gi|210078005|emb|CAR92545.1|	128	4.00E-56	activin type II receptor precursor [Crassostrea gigas]	sp|Q95126|AVR2B_BOVIN	142	2.00E-33	Activin receptor type-2B OS=Bos taurus GN=ACVR2B PE=2 SV=1
Unigene10911_JingChaoZuZhi2	897	50	7.6759	gi|66813988|ref|XP_641173.1|	60.1	1.00E-07	dynactin 150 kDa subunit [Dictyostelium discoideum AX4] >gi|60469201|gb|EAL67196.1| dynactin 150 kDa subunit [Dictyostelium discoideum AX4]	sp|O88799|ZAN_MOUSE	44.3	5.00E-08	Zonadhesin OS=Mus musculus GN=Zan PE=2 SV=1
Unigene10912_JingChaoZuZhi2	290	27	12.8209	--	--	--	--	--	--	--	--
Unigene10913_JingChaoZuZhi2	710	160	31.0323	--	--	--	--	--	--	--	--
Unigene10914_JingChaoZuZhi2	756	77	14.0256	gi|224084956|ref|XP_002195548.1|	114	4.00E-49	PREDICTED: similar to importin 9 [Taeniopygia guttata]	sp|Q96P70|IPO9_HUMAN	109	3.00E-48	Importin-9 OS=Homo sapiens GN=IPO9 PE=1 SV=3
Unigene10915_JingChaoZuZhi2	819	154	25.8934	--	--	--	--	--	--	--	--
Unigene10916_JingChaoZuZhi2	1288	138	14.7542	--	--	--	--	--	--	--	--
Unigene10917_JingChaoZuZhi2	856	100	16.0871	gi|82409002|gb|ABB73282.1|	62.8	2.00E-08	reverse transcriptase [Penaeus monodon]	--	--	--	--
Unigene10918_JingChaoZuZhi2	262	10	5.2559	--	--	--	--	--	--	--	--
Unigene10919_JingChaoZuZhi2	2664	669	34.5815	gi|118103174|ref|XP_425887.2|	441	1.00E-122	PREDICTED: similar to REX1, RNA exonuclease 1 homolog (S. cerevisiae) [Gallus gallus]	sp|Q7TT28|REXO1_MOUSE	420	2.00E-116	RNA exonuclease 1 homolog OS=Mus musculus GN=Rexo1 PE=1 SV=1
Unigene1091_JingChaoZuZhi2	461	14	4.182	gi|126723480|ref|NP_001075703.1|	46.6	6.00E-06	sarcoplasmic reticulum histidine-rich calcium-binding protein precursor [Oryctolagus cuniculus] >gi|134874|sp|P16230.1|SRCH_RABIT RecName: Full=Sarcoplasmic reticulum histidine-rich calcium-binding protein; Flags: Precursor >gi|165100|gb|AAA31279.1| histidine-rich calcium-binding protein [Oryctolagus cuniculus]	sp|P16230|SRCH_RABIT	46.6	1.00E-06	Sarcoplasmic reticulum histidine-rich calcium-binding protein OS=Oryctolagus cuniculus GN=HRC PE=1 SV=1
Unigene10920_JingChaoZuZhi2	298	13	6.0073	--	--	--	--	--	--	--	--
Unigene10921_JingChaoZuZhi2	522	127	33.5031	--	--	--	--	--	--	--	--
Unigene10922_JingChaoZuZhi2	408	28	9.4504	gi|167516312|ref|XP_001742497.1|	55.8	4.00E-07	SH3, pleckstrin-like and PDZ/DHR/GLGF domain-containing protein [Monosiga brevicollis MX1] >gi|163779121|gb|EDQ92735.1| SH3, pleckstrin-like and PDZ/DHR/GLGF domain-containing protein [Monosiga brevicollis MX1]	sp|Q9FPQ6|GP1_CHLRE	52.4	9.00E-07	Vegetative cell wall protein gp1 OS=Chlamydomonas reinhardtii GN=GP1 PE=2 SV=1
Unigene10923_JingChaoZuZhi2	1072	263	33.7841	--	--	--	--	--	--	--	--
Unigene10924_JingChaoZuZhi2	573	68	16.342	gi|158287639|ref|XP_309626.3|	314	1.00E-84	AGAP004071-PA [Anopheles gambiae str. PEST] >gi|157019519|gb|EAA05335.3| AGAP004071-PA [Anopheles gambiae str. PEST]	sp|P54680|FIMB_DICDI	214	3.00E-55	Fimbrin OS=Dictyostelium discoideum GN=fimA PE=2 SV=2
Unigene10925_JingChaoZuZhi2	498	36	9.9546	--	--	--	--	--	--	--	--
Unigene10926_JingChaoZuZhi2	330	5	2.0864	gi|307214124|gb|EFN89288.1|	70.5	2.00E-11	Tyrosine-protein kinase Abl [Harpegnathos saltator]	sp|P00522|ABL_DROME	67	3.00E-11	Tyrosine-protein kinase Abl OS=Drosophila melanogaster GN=Abl PE=1 SV=3
Unigene10927_JingChaoZuZhi2	1444	195	18.596	gi|194216159|ref|XP_001494583.2|	137	8.00E-31	PREDICTED: similar to hCG2044798 [Equus caballus]	sp|Q5TYW1|ZN658_HUMAN	133	3.00E-30	Zinc finger protein 658 OS=Homo sapiens GN=ZNF658 PE=2 SV=2
Unigene10928_JingChaoZuZhi2	1097	136	17.072	gi|72006969|ref|XP_782974.1|	191	5.00E-71	PREDICTED: similar to MGC81459 protein [Strongylocentrotus purpuratus] >gi|115960992|ref|XP_001180175.1| PREDICTED: similar to MGC81459 protein [Strongylocentrotus purpuratus]	sp|Q8IXB1|DJC10_HUMAN	156	4.00E-62	DnaJ homolog subfamily C member 10 OS=Homo sapiens GN=DNAJC10 PE=1 SV=2
Unigene10929_JingChaoZuZhi2	338	45	18.3336	--	--	--	--	--	--	--	--
Unigene1092_JingChaoZuZhi2	411	73	24.4587	--	--	--	--	--	--	--	--
Unigene10930_JingChaoZuZhi2	469	47	13.7999	gi|91078372|ref|XP_974116.1|	179	3.00E-44	PREDICTED: similar to CG7974 CG7974-PA [Tribolium castaneum]	sp|Q9NZ63|CI078_HUMAN	145	1.00E-34	Uncharacterized protein C9orf78 OS=Homo sapiens GN=C9orf78 PE=1 SV=1
Unigene10931_JingChaoZuZhi2	518	178	47.3197	gi|119926608|ref|XP_001255936.1|	55.5	8.00E-07	PREDICTED: oxysterol-binding protein-like 1A-like, partial [Bos taurus]	--	--	--	--
Unigene10932_JingChaoZuZhi2	348	47	18.5982	gi|149030129|gb|EDL85206.1|	57.8	1.00E-07	rCG23142 [Rattus norvegicus]	sp|Q99N37|RHG17_RAT	52.4	9.00E-07	Rho GTPase-activating protein 17 OS=Rattus norvegicus GN=Arhgap17 PE=1 SV=1
Unigene10933_JingChaoZuZhi2	357	7	2.7001	--	--	--	--	--	--	--	--
Unigene10934_JingChaoZuZhi2	335	14	5.7549	--	--	--	--	--	--	--	--
Unigene10935_JingChaoZuZhi2	438	72	22.6365	gi|148664579|gb|EDK96995.1|	62.4	5.00E-09	mCG144788 [Mus musculus]	--	--	--	--
Unigene10936_JingChaoZuZhi2	483	45	12.8297	gi|4262637|gb|AAD14753.1|	58.2	1.00E-07	Hypothetical protein W03G1.5 [Caenorhabditis elegans]	sp|Q7YR38|PP1RA_PANTR	49.7	8.00E-06	Serine/threonine-protein phosphatase 1 regulatory subunit 10 OS=Pan troglodytes GN=PPP1R10 PE=3 SV=1
Unigene10937_JingChaoZuZhi2	1324	128	13.3129	gi|307173958|gb|EFN64688.1|	93.6	5.00E-27	Gamma-tubulin complex component 5 [Camponotus floridanus]	sp|Q8BKN5|GCP5_MOUSE	71.2	2.00E-20	Gamma-tubulin complex component 5 OS=Mus musculus GN=Tubgcp5 PE=2 SV=2
Unigene10938_JingChaoZuZhi2	327	13	5.4745	--	--	--	--	--	--	--	--
Unigene10939_JingChaoZuZhi2	465	44	13.0302	gi|347227|gb|AAA49027.1|	108	4.00E-32	reverse transcriptase [Gallus gallus]	sp|P21328|RTJK_DROME	44.3	2.00E-06	RNA-directed DNA polymerase from mobile element jockey OS=Drosophila melanogaster GN=pol PE=1 SV=1
Unigene1093_JingChaoZuZhi2	1035	213	28.3394	--	--	--	--	--	--	--	--
Unigene10940_JingChaoZuZhi2	306	15	6.7503	--	--	--	--	--	--	--	--
Unigene10941_JingChaoZuZhi2	326	21	8.8706	--	--	--	--	--	--	--	--
Unigene10942_JingChaoZuZhi2	294	9	4.2155	--	--	--	--	--	--	--	--
Unigene10943_JingChaoZuZhi2	358	98	37.696	--	--	--	--	--	--	--	--
Unigene10944_JingChaoZuZhi2	345	38	15.1676	--	--	--	--	--	--	--	--
Unigene10945_JingChaoZuZhi2	441	105	32.7871	--	--	--	--	--	--	--	--
Unigene10946_JingChaoZuZhi2	310	22	9.7727	--	--	--	--	--	--	--	--
Unigene10947_JingChaoZuZhi2	306	23	10.3504	--	--	--	--	--	--	--	--
Unigene10948_JingChaoZuZhi2	629	104	22.7685	--	--	--	--	--	--	--	--
Unigene10949_JingChaoZuZhi2	461	48	14.3381	--	--	--	--	--	--	--	--
Unigene1094_JingChaoZuZhi2	396	63	21.9077	gi|189236448|ref|XP_973457.2|	133	2.00E-30	PREDICTED: similar to chaperone protein dnaj [Tribolium castaneum]	sp|Q27237|TID_DROME	125	8.00E-29	Protein tumorous imaginal discs, mitochondrial OS=Drosophila melanogaster GN=l(2)tid PE=1 SV=2
Unigene10950_JingChaoZuZhi2	286	38	18.2966	--	--	--	--	--	--	--	--
Unigene10951_JingChaoZuZhi2	454	12	3.6398	gi|156537494|ref|XP_001607344.1|	62.4	3.00E-24	PREDICTED: similar to ankyrin repeat domain 50 [Nasonia vitripennis]	sp|Q9ULJ7|ANR50_HUMAN	55.1	3.00E-15	Ankyrin repeat domain-containing protein 50 OS=Homo sapiens GN=ANKRD50 PE=1 SV=4
Unigene10952_JingChaoZuZhi2	885	82	12.7592	--	--	--	--	--	--	--	--
Unigene10953_JingChaoZuZhi2	566	62	15.0844	--	--	--	--	--	--	--	--
Unigene10954_JingChaoZuZhi2	331	16	6.6565	gi|307176723|gb|EFN66138.1|	63.9	2.00E-09	G-protein coupled receptor Mth2 [Camponotus floridanus]	sp|Q95NT6|MTH2_DROYA	58.5	1.00E-08	G-protein coupled receptor Mth2 OS=Drosophila yakuba GN=mth2 PE=3 SV=1
Unigene10955_JingChaoZuZhi2	599	87	20.0007	gi|198431309|ref|XP_002120798.1|	253	2.00E-66	PREDICTED: similar to ADP-ribosylation factor-like 2 [Ciona intestinalis]	sp|P36404|ARL2_HUMAN	250	4.00E-66	ADP-ribosylation factor-like protein 2 OS=Homo sapiens GN=ARL2 PE=1 SV=4
Unigene10956_JingChaoZuZhi2	605	47	10.6978	--	--	--	--	--	--	--	--
Unigene10957_JingChaoZuZhi2	695	90	17.8324	gi|291239983|ref|XP_002739898.1|	210	3.00E-53	PREDICTED: fructosamine 3 kinase related protein-like [Saccoglossus kowalevskii]	sp|Q9ER35|FN3K_MOUSE	202	2.00E-51	Fructosamine-3-kinase OS=Mus musculus GN=Fn3k PE=2 SV=1
Unigene10958_JingChaoZuZhi2	504	67	18.3061	--	--	--	--	--	--	--	--
Unigene10959_JingChaoZuZhi2	429	81	26.0004	gi|110766803|ref|XP_397294.3|	52	5.00E-15	PREDICTED: similar to RhoGAP54D CG6477-PA, isoform A [Apis mellifera]	sp|Q6INE5|RHG19_XENLA	49.3	2.00E-07	Rho GTPase-activating protein 19 OS=Xenopus laevis GN=arhgap19 PE=2 SV=1
Unigene1095_JingChaoZuZhi2	597	275	63.4323	gi|307207119|gb|EFN84928.1|	164	2.00E-39	Iron/zinc purple acid phosphatase-like protein [Harpegnathos saltator]	sp|Q6ZNF0|PAPL_HUMAN	118	3.00E-26	Iron/zinc purple acid phosphatase-like protein OS=Homo sapiens GN=PAPL PE=2 SV=2
Unigene10960_JingChaoZuZhi2	280	13	6.3935	--	--	--	--	--	--	--	--
Unigene10961_JingChaoZuZhi2	387	37	13.1657	--	--	--	--	--	--	--	--
Unigene10962_JingChaoZuZhi2	319	11	4.7485	--	--	--	--	--	--	--	--
Unigene10963_JingChaoZuZhi2	646	100	21.3167	gi|91088975|ref|XP_966570.1|	63.2	1.00E-21	PREDICTED: similar to HEAT repeat containing 6 [Tribolium castaneum]	sp|Q6AI08|HEAT6_HUMAN	65.9	6.00E-16	HEAT repeat-containing protein 6 OS=Homo sapiens GN=HEATR6 PE=1 SV=1
Unigene10964_JingChaoZuZhi2	588	126	29.5084	--	--	--	--	--	--	--	--
Unigene10965_JingChaoZuZhi2	326	15	6.3361	--	--	--	--	--	--	--	--
Unigene10966_JingChaoZuZhi2	526	82	21.4674	--	--	--	--	--	--	--	--
Unigene10967_JingChaoZuZhi2	305	14	6.3209	gi|156543573|ref|XP_001603800.1|	102	3.00E-21	PREDICTED: similar to rap gtpase-activating protein [Nasonia vitripennis]	sp|Q5JCS6|SI1L2_RAT	76.6	4.00E-14	Signal-induced proliferation-associated 1-like protein 2 OS=Rattus norvegicus GN=Sipa1l2 PE=2 SV=1
Unigene10968_JingChaoZuZhi2	515	35	9.3586	gi|195399632|ref|XP_002058423.1|	62.8	5.00E-09	GJ14320 [Drosophila virilis] >gi|194141983|gb|EDW58391.1| GJ14320 [Drosophila virilis]	sp|Q4X0M4|SEC31_ASPFU	54.3	4.00E-07	Protein transport protein sec31 OS=Aspergillus fumigatus GN=sec31 PE=3 SV=1
Unigene10969_JingChaoZuZhi2	351	56	21.9701	gi|170050777|ref|XP_001861464.1|	63.5	2.00E-09	pugilistDominant [Culex quinquefasciatus] >gi|167872266|gb|EDS35649.1| pugilistDominant [Culex quinquefasciatus]	sp|A5E4P1|PXR1_LODEL	54.3	2.00E-07	Protein PXR1 OS=Lodderomyces elongisporus GN=PXR1 PE=3 SV=1
Unigene1096_JingChaoZuZhi2	615	130	29.1085	--	--	--	--	--	--	--	--
Unigene10970_JingChaoZuZhi2	334	43	17.7286	--	--	--	--	--	--	--	--
Unigene10971_JingChaoZuZhi2	466	34	10.0472	gi|268562746|ref|XP_002638655.1|	53.5	2.00E-06	Hypothetical protein CBG11839 [Caenorhabditis briggsae]	--	--	--	--
Unigene10972_JingChaoZuZhi2	263	44	23.0382	--	--	--	--	--	--	--	--
Unigene10973_JingChaoZuZhi2	790	177	30.853	--	--	--	--	--	--	--	--
Unigene10974_JingChaoZuZhi2	365	22	8.3001	gi|194866526|ref|XP_001971901.1|	61.2	1.00E-08	GG15230 [Drosophila erecta] >gi|190653684|gb|EDV50927.1| GG15230 [Drosophila erecta]	sp|Q9FLQ7|FH20_ARATH	61.2	2.00E-09	Formin-like protein 20 OS=Arabidopsis thaliana GN=FH20 PE=2 SV=2
Unigene10975_JingChaoZuZhi2	312	10	4.4136	--	--	--	--	--	--	--	--
Unigene10976_JingChaoZuZhi2	330	28	11.6841	gi|115937417|ref|XP_001182713.1|	55.5	6.00E-07	PREDICTED: similar to endonuclease/reverse transcriptase [Strongylocentrotus purpuratus]	--	--	--	--
Unigene10977_JingChaoZuZhi2	278	16	7.9255	gi|195121628|ref|XP_002005322.1|	63.9	2.00E-09	GI20418 [Drosophila mojavensis] >gi|193910390|gb|EDW09257.1| GI20418 [Drosophila mojavensis]	sp|O70597|PX11A_RAT	48.9	1.00E-05	Peroxisomal membrane protein 11A OS=Rattus norvegicus GN=Pex11a PE=1 SV=1
Unigene10978_JingChaoZuZhi2	524	38	9.9863	--	--	--	--	--	--	--	--
Unigene10979_JingChaoZuZhi2	445	12	3.7134	gi|198437168|ref|XP_002122703.1|	60.1	2.00E-08	PREDICTED: similar to thrombospondin type 1 repeat containing protein [Ciona intestinalis]	sp|P54704|SP85_DICDI	59.3	8.00E-09	Spore coat protein SP85 OS=Dictyostelium discoideum GN=pspB PE=1 SV=2
Unigene1097_JingChaoZuZhi2	586	84	19.7394	--	--	--	--	--	--	--	--
Unigene10980_JingChaoZuZhi2	1757	430	33.7014	--	--	--	--	--	--	--	--
Unigene10981_JingChaoZuZhi2	513	88	23.622	gi|126334861|ref|XP_001374808.1|	172	6.00E-42	PREDICTED: similar to SMC2 protein [Monodelphis domestica]	sp|P50533|SMC2_XENLA	166	9.00E-41	Structural maintenance of chromosomes protein 2 OS=Xenopus laevis GN=smc2 PE=1 SV=1
Unigene10982_JingChaoZuZhi2	294	8	3.7471	--	--	--	--	--	--	--	--
Unigene10983_JingChaoZuZhi2	269	15	7.6788	--	--	--	--	--	--	--	--
Unigene10984_JingChaoZuZhi2	724	62	11.7925	gi|170042037|ref|XP_001848748.1|	184	3.00E-45	g-protein coupled receptor [Culex quinquefasciatus] >gi|167865571|gb|EDS28954.1| g-protein coupled receptor [Culex quinquefasciatus]	sp|Q9DDN6|NPY2R_CHICK	87.8	6.00E-17	Neuropeptide Y receptor type 2 OS=Gallus gallus GN=NPY2R PE=3 SV=1
Unigene10985_JingChaoZuZhi2	422	66	21.5369	gi|189239403|ref|XP_973700.2|	218	7.00E-56	PREDICTED: similar to myosin vii [Tribolium castaneum]	sp|Q17LW0|MYO7A_AEDAE	60.8	2.00E-09	Myosin-VIIa OS=Aedes aegypti GN=ck PE=3 SV=1
Unigene10986_JingChaoZuZhi2	314	18	7.894	gi|182889828|gb|AAI65693.1|	110	1.00E-23	Msh2 protein [Danio rerio]	sp|P43247|MSH2_MOUSE	104	1.00E-22	DNA mismatch repair protein Msh2 OS=Mus musculus GN=Msh2 PE=2 SV=1
Unigene10987_JingChaoZuZhi2	279	15	7.4035	--	--	--	--	--	--	--	--
Unigene10988_JingChaoZuZhi2	421	34	11.1211	gi|195129876|ref|XP_002009380.1|	60.1	2.00E-08	GI15320 [Drosophila mojavensis] >gi|193907830|gb|EDW06697.1| GI15320 [Drosophila mojavensis]	--	--	--	--
Unigene10989_JingChaoZuZhi2	288	18	8.6066	--	--	--	--	--	--	--	--
Unigene1098_JingChaoZuZhi2	633	166	36.1124	--	--	--	--	--	--	--	--
Unigene10990_JingChaoZuZhi2	775	63	11.1941	--	--	--	--	--	--	--	--
Unigene10991_JingChaoZuZhi2	494	70	19.5129	--	--	--	--	--	--	--	--
Unigene10992_JingChaoZuZhi2	815	124	20.9515	gi|47086541|ref|NP_997919.1|	151	3.00E-35	DNA-directed RNA polymerase III subunit RPC5 [Danio rerio] >gi|29124510|gb|AAH48877.1| Polymerase (RNA) III (DNA directed) polypeptide E [Danio rerio]	sp|Q9NVU0|RPC5_HUMAN	147	1.00E-34	DNA-directed RNA polymerase III subunit RPC5 OS=Homo sapiens GN=POLR3E PE=1 SV=1
Unigene10993_JingChaoZuZhi2	409	26	8.7539	--	--	--	--	--	--	--	--
Unigene10994_JingChaoZuZhi2	499	41	11.3145	gi|158290731|ref|XP_563520.3|	58.2	1.00E-07	AGAP002629-PA [Anopheles gambiae str. PEST] >gi|157018037|gb|EAL40875.3| AGAP002629-PA [Anopheles gambiae str. PEST]	sp|B5XVT3|ZIPA_KLEP3	53.5	6.00E-07	Cell division protein ZipA homolog OS=Klebsiella pneumoniae (strain 342) GN=zipA PE=3 SV=1
Unigene10995_JingChaoZuZhi2	285	16	7.7308	gi|270015104|gb|EFA11552.1|	84	2.00E-15	plexin A [Tribolium castaneum]	sp|Q80UG2|PLXA4_MOUSE	74.3	2.00E-13	Plexin-A4 OS=Mus musculus GN=Plxna4 PE=2 SV=2
Unigene10996_JingChaoZuZhi2	342	14	5.6371	--	--	--	--	--	--	--	--
Unigene10997_JingChaoZuZhi2	548	99	24.8775	--	--	--	--	--	--	--	--
Unigene10998_JingChaoZuZhi2	275	11	5.5082	--	--	--	--	--	--	--	--
Unigene10999_JingChaoZuZhi2	909	124	18.7849	gi|189242045|ref|XP_968176.2|	261	3.00E-68	PREDICTED: similar to collagen alpha chain, anopheles [Tribolium castaneum]	sp|Q9JI03|CO5A1_RAT	237	1.00E-61	Collagen alpha-1(V) chain OS=Rattus norvegicus GN=Col5a1 PE=1 SV=1
Unigene1099_JingChaoZuZhi2	254	8	4.3372	--	--	--	--	--	--	--	--
Unigene109_JingChaoZuZhi2	658	166	34.7403	--	--	--	--	--	--	--	--
Unigene10_JingChaoZuZhi2	571	25	6.0291	gi|164451511|gb|ABY56690.1|	188	1.00E-92	actin [Culex nigripalpus]	sp|P45886|ACT3_BACDO	188	2.00E-92	Actin-3, muscle-specific OS=Bactrocera dorsalis PE=2 SV=1
Unigene11000_JingChaoZuZhi2	418	14	4.6122	gi|224062731|ref|XP_002199843.1|	48.1	2.00E-12	PREDICTED: insulin-like growth factor 1 receptor [Taeniopygia guttata]	sp|Q60751|IGF1R_MOUSE	48.9	7.00E-13	Insulin-like growth factor 1 receptor OS=Mus musculus GN=Igf1r PE=1 SV=3
Unigene11001_JingChaoZuZhi2	635	27	5.8552	gi|123412829|ref|XP_001304161.1|	109	8.00E-23	trichohyalin [Trichomonas vaginalis G3]	sp|P49756|RBM25_HUMAN	88.2	4.00E-17	RNA-binding protein 25 OS=Homo sapiens GN=RBM25 PE=1 SV=3
Unigene11002_JingChaoZuZhi2	608	47	10.645	gi|115931431|ref|XP_001185218.1|	57.8	3.00E-07	PREDICTED: similar to Syne-1B [Strongylocentrotus purpuratus]	sp|Q6BUE3|PXR1_DEBHA	53.9	7.00E-07	Protein PXR1 OS=Debaryomyces hansenii GN=PXR1 PE=3 SV=1
Unigene11003_JingChaoZuZhi2	450	24	7.3443	--	--	--	--	--	--	--	--
Unigene11004_JingChaoZuZhi2	318	19	8.2277	--	--	--	--	--	--	--	--
Unigene11005_JingChaoZuZhi2	326	121	51.1116	gi|291232654|ref|XP_002736275.1|	61.6	8.00E-09	PREDICTED: gamma-butyrobetaine dioxygenase-like [Saccoglossus kowalevskii]	--	--	--	--
Unigene11006_JingChaoZuZhi2	829	149	24.7505	--	--	--	--	--	--	--	--
Unigene11007_JingChaoZuZhi2	592	22	5.1174	--	--	--	--	--	--	--	--
Unigene11008_JingChaoZuZhi2	757	150	27.2865	gi|158290198|ref|XP_001230841.2|	48.9	3.00E-11	AGAP001055-PA [Anopheles gambiae str. PEST] >gi|157018263|gb|EAU77137.2| AGAP001055-PA [Anopheles gambiae str. PEST]	sp|P35637|FUS_HUMAN	69.3	3.00E-11	RNA-binding protein FUS OS=Homo sapiens GN=FUS PE=1 SV=1
Unigene11009_JingChaoZuZhi2	254	11	5.9636	--	--	--	--	--	--	--	--
Unigene1100_JingChaoZuZhi2	239	2	1.1523	--	--	--	--	--	--	--	--
Unigene11010_JingChaoZuZhi2	528	61	15.9092	--	--	--	--	--	--	--	--
Unigene11011_JingChaoZuZhi2	280	14	6.8853	gi|115613970|ref|XP_001193412.1|	77	2.00E-13	PREDICTED: similar to Leucine zipper transcription factor-like 1, partial [Strongylocentrotus purpuratus] >gi|115618083|ref|XP_001181164.1| PREDICTED: similar to Leucine zipper transcription factor-like 1, partial [Strongylocentrotus purpuratus]	sp|Q562C6|LZTL1_RAT	69.3	7.00E-12	Leucine zipper transcription factor-like protein 1 OS=Rattus norvegicus GN=Lztfl1 PE=2 SV=1
Unigene11012_JingChaoZuZhi2	363	24	9.1045	--	--	--	--	--	--	--	--
Unigene11013_JingChaoZuZhi2	533	59	15.2432	--	--	--	--	--	--	--	--
Unigene11014_JingChaoZuZhi2	259	52	27.6475	gi|301782441|ref|XP_002926636.1|	90.5	2.00E-17	PREDICTED: exportin-6-like [Ailuropoda melanoleuca]	sp|Q924Z6|XPO6_MOUSE	88.2	1.00E-17	Exportin-6 OS=Mus musculus GN=Xpo6 PE=2 SV=2
Unigene11015_JingChaoZuZhi2	651	39	8.2496	--	--	--	--	--	--	--	--
Unigene11016_JingChaoZuZhi2	2166	264	16.7841	gi|117575|sp|P23093.1|CSP_PLABA	56.6	7.00E-15	RecName: Full=Circumsporozoite protein; Short=CS; Flags: Precursor >gi|9785|emb|CAA35608.1| precursor protein (AA -20 to 327) [Plasmodium berghei]	sp|P23093|CSP_PLABA	56.6	1.00E-15	Circumsporozoite protein OS=Plasmodium berghei (strain Anka) PE=3 SV=1
Unigene11017_JingChaoZuZhi2	262	14	7.3583	--	--	--	--	--	--	--	--
Unigene11018_JingChaoZuZhi2	785	76	13.332	gi|194766039|ref|XP_001965132.1|	65.1	3.00E-09	GF23569 [Drosophila ananassae] >gi|190617742|gb|EDV33266.1| GF23569 [Drosophila ananassae]	sp|Q6ZQP7|YV021_HUMAN	56.2	2.00E-07	Uncharacterized protein LOC284861 OS=Homo sapiens PE=2 SV=1
Unigene11019_JingChaoZuZhi2	414	48	15.9659	--	--	--	--	--	--	--	--
Unigene1101_JingChaoZuZhi2	524	152	39.9452	--	--	--	--	--	--	--	--
Unigene11020_JingChaoZuZhi2	322	16	6.8425	gi|62637998|gb|AAX92638.1|	56.6	3.00E-07	glucose transporter 8 [Solenopsis invicta]	sp|A5LGM7|TRET1_POLVA	55.8	8.00E-08	Facilitated trehalose transporter Tret1 OS=Polypedilum vanderplanki GN=Tret1 PE=1 SV=1
Unigene11021_JingChaoZuZhi2	289	20	9.5298	--	--	--	--	--	--	--	--
Unigene11022_JingChaoZuZhi2	324	12	5.1002	--	--	--	--	--	--	--	--
Unigene11023_JingChaoZuZhi2	386	22	7.8485	--	--	--	--	--	--	--	--
Unigene11024_JingChaoZuZhi2	301	36	16.4698	--	--	--	--	--	--	--	--
Unigene11025_JingChaoZuZhi2	371	71	26.3534	--	--	--	--	--	--	--	--
Unigene11026_JingChaoZuZhi2	345	18	7.1846	gi|71420600|ref|XP_811543.1|	55.1	7.00E-07	hypothetical protein [Trypanosoma cruzi strain CL Brener] >gi|70876217|gb|EAN89692.1| hypothetical protein, conserved [Trypanosoma cruzi]	--	--	--	--
Unigene11027_JingChaoZuZhi2	1008	215	29.3717	--	--	--	--	--	--	--	--
Unigene11028_JingChaoZuZhi2	387	17	6.0491	--	--	--	--	--	--	--	--
Unigene11029_JingChaoZuZhi2	791	91	15.8422	gi|302565035|ref|NP_001181622.1|	89.4	1.00E-16	solute carrier family 22 member 8 [Macaca mulatta]	sp|Q5R9C4|S22A8_PONAB	85.5	4.00E-16	Solute carrier family 22 member 8 OS=Pongo abelii GN=SLC22A8 PE=2 SV=1
Unigene1102_JingChaoZuZhi2	206	15	10.0271	gi|42544117|ref|NP_974487.1|	83.2	3.00E-15	mitochondrial enolase superfamily member 1 isoform rTSgamma [Homo sapiens]	sp|Q2KIA9|ENOF1_BOVIN	79.7	5.00E-15	Mitochondrial enolase superfamily member 1 OS=Bos taurus GN=ENOSF1 PE=2 SV=1
Unigene11030_JingChaoZuZhi2	421	22	7.196	gi|198415299|ref|XP_002125247.1|	60.5	1.00E-11	PREDICTED: similar to MGC84402 protein, partial [Ciona intestinalis]	sp|Q811G0|PTHB1_MOUSE	63.5	4.00E-12	Protein PTHB1 OS=Mus musculus GN=Bbs9 PE=2 SV=2
Unigene11031_JingChaoZuZhi2	496	70	19.4343	--	--	--	--	--	--	--	--
Unigene11032_JingChaoZuZhi2	552	22	5.4883	--	--	--	--	--	--	--	--
Unigene11033_JingChaoZuZhi2	1929	368	26.2704	gi|170033887|ref|XP_001844807.1|	189	3.00E-46	odd Oz protein [Culex quinquefasciatus] >gi|167875052|gb|EDS38435.1| odd Oz protein [Culex quinquefasciatus]	sp|Q9W7R4|TEN3_DANRE	72	1.00E-11	Teneurin-3 OS=Danio rerio GN=odz3 PE=2 SV=1
Unigene11034_JingChaoZuZhi2	304	11	4.9828	gi|110756314|ref|XP_001121777.1|	93.2	2.00E-18	PREDICTED: similar to spermidine/spermine N1-acetyl transferase-like 1 [Apis mellifera]	sp|Q79FL2|PPE24_MYCTU	58.2	2.00E-08	Uncharacterized PPE family protein PPE24 OS=Mycobacterium tuberculosis GN=ppe24 PE=3 SV=1
Unigene11035_JingChaoZuZhi2	697	128	25.2888	gi|66529173|ref|XP_623860.1|	198	2.00E-49	PREDICTED: similar to CG17509-PA [Apis mellifera]	sp|Q5U241|PD5BB_XENLA	130	8.00E-30	Sister chromatid cohesion protein PDS5 homolog B-B OS=Xenopus laevis GN=pds5b-b PE=1 SV=2
Unigene11036_JingChaoZuZhi2	356	11	4.2549	--	--	--	--	--	--	--	--
Unigene11037_JingChaoZuZhi2	283	17	8.2721	--	--	--	--	--	--	--	--
Unigene11038_JingChaoZuZhi2	2058	391	26.1627	--	--	--	--	--	--	--	--
Unigene11039_JingChaoZuZhi2	300	23	10.5574	--	--	--	--	--	--	--	--
Unigene1103_JingChaoZuZhi2	276	20	9.9787	--	--	--	--	--	--	--	--
Unigene11040_JingChaoZuZhi2	274	12	6.0309	--	--	--	--	--	--	--	--
Unigene11041_JingChaoZuZhi2	594	30	6.9548	--	--	--	--	--	--	--	--
Unigene11042_JingChaoZuZhi2	335	17	6.988	gi|195471254|ref|XP_002087920.1|	56.2	3.00E-07	GE18286 [Drosophila yakuba] >gi|194174021|gb|EDW87632.1| GE18286 [Drosophila yakuba]	sp|Q91Z58|CF132_MOUSE	53.9	3.00E-07	Uncharacterized protein C6orf132 homolog OS=Mus musculus PE=1 SV=2
Unigene11043_JingChaoZuZhi2	642	62	13.2987	gi|292614711|ref|XP_002662351.1|	337	1.00E-91	PREDICTED: MCM6 minichromosome maintenance deficient 6, mitotin-like [Danio rerio]	sp|Q498J7|MC6ZA_XENLA	328	1.00E-89	Zygotic DNA replication licensing factor mcm6-A OS=Xenopus laevis GN=zmcm6-a PE=1 SV=1
Unigene11044_JingChaoZuZhi2	344	79	31.6243	--	--	--	--	--	--	--	--
Unigene11045_JingChaoZuZhi2	339	45	18.2795	--	--	--	--	--	--	--	--
Unigene11046_JingChaoZuZhi2	319	22	9.4969	--	--	--	--	--	--	--	--
Unigene11047_JingChaoZuZhi2	397	20	6.9373	--	--	--	--	--	--	--	--
Unigene11048_JingChaoZuZhi2	947	126	18.322	gi|170037187|ref|XP_001846441.1|	219	1.00E-55	brefeldin A-inhibited guanine nucleotide-exchange protein 1 [Culex quinquefasciatus] >gi|167880195|gb|EDS43578.1| brefeldin A-inhibited guanine nucleotide-exchange protein 1 [Culex quinquefasciatus]	sp|Q9Y6D6|BIG1_HUMAN	209	2.00E-53	Brefeldin A-inhibited guanine nucleotide-exchange protein 1 OS=Homo sapiens GN=ARFGEF1 PE=1 SV=2
Unigene11049_JingChaoZuZhi2	1724	338	26.998	gi|193613322|ref|XP_001949220.1|	332	2.00E-89	PREDICTED: similar to g-protein coupled receptor [Acyrthosiphon pisum]	sp|Q9VZW5|FMAR_DROME	102	9.00E-21	FMRFamide receptor OS=Drosophila melanogaster GN=FR PE=2 SV=1
Unigene1104_JingChaoZuZhi2	402	41	14.0446	gi|116283654|gb|AAH21396.1|	52.8	4.00E-06	Diap1 protein [Mus musculus]	--	--	--	--
Unigene11050_JingChaoZuZhi2	1203	297	33.9972	--	--	--	--	--	--	--	--
Unigene11051_JingChaoZuZhi2	536	44	11.3042	--	--	--	--	--	--	--	--
Unigene11052_JingChaoZuZhi2	372	29	10.7351	gi|307195039|gb|EFN77097.1|	57	2.00E-10	Nuclear factor 1 A-type [Harpegnathos saltator]	sp|Q01538|MYT1_HUMAN	57.4	9.00E-11	Myelin transcription factor 1 OS=Homo sapiens GN=MYT1 PE=1 SV=2
Unigene11053_JingChaoZuZhi2	378	68	24.7724	gi|121484216|gb|ABM54465.1|	58.2	9.00E-08	cuticle protein CB6 [Portunus pelagicus]	--	--	--	--
Unigene11054_JingChaoZuZhi2	564	69	16.847	--	--	--	--	--	--	--	--
Unigene11055_JingChaoZuZhi2	312	19	8.3859	gi|193671769|ref|XP_001944054.1|	91.7	7.00E-18	PREDICTED: similar to phospholipase A2, group VI [Acyrthosiphon pisum]	sp|O60733|PA2G6_HUMAN	73.6	4.00E-13	85 kDa calcium-independent phospholipase A2 OS=Homo sapiens GN=PLA2G6 PE=1 SV=2
Unigene11056_JingChaoZuZhi2	292	14	6.6023	--	--	--	--	--	--	--	--
Unigene11057_JingChaoZuZhi2	263	9	4.7124	--	--	--	--	--	--	--	--
Unigene11058_JingChaoZuZhi2	431	15	4.7925	--	--	--	--	--	--	--	--
Unigene11059_JingChaoZuZhi2	399	14	4.8318	--	--	--	--	--	--	--	--
Unigene1105_JingChaoZuZhi2	251	19	10.4239	--	--	--	--	--	--	--	--
Unigene11060_JingChaoZuZhi2	976	171	24.1267	gi|169218417|gb|ACA50099.1|	80.1	1.00E-13	reverse transcriptase-like protein [Ectropis obliqua]	sp|Q05049|MUC1_XENLA	37	1.00E-05	Integumentary mucin C.1 (Fragment) OS=Xenopus laevis PE=2 SV=1
Unigene11061_JingChaoZuZhi2	271	9	4.5733	--	--	--	--	--	--	--	--
Unigene11062_JingChaoZuZhi2	454	47	14.2559	--	--	--	--	--	--	--	--
Unigene11063_JingChaoZuZhi2	259	12	6.3802	--	--	--	--	--	--	--	--
Unigene11064_JingChaoZuZhi2	412	68	22.7281	gi|307196543|gb|EFN78073.1|	146	2.00E-34	Lysyl oxidase-like protein 4 [Harpegnathos saltator]	sp|P98088|MUC5A_HUMAN	58.9	9.00E-09	Mucin-5AC (Fragments) OS=Homo sapiens GN=MUC5AC PE=1 SV=3
Unigene11065_JingChaoZuZhi2	269	45	23.0363	--	--	--	--	--	--	--	--
Unigene11066_JingChaoZuZhi2	317	33	14.3353	--	--	--	--	--	--	--	--
Unigene11067_JingChaoZuZhi2	411	24	8.0412	--	--	--	--	--	--	--	--
Unigene11068_JingChaoZuZhi2	490	51	14.3326	--	--	--	--	--	--	--	--
Unigene11069_JingChaoZuZhi2	281	13	6.3707	--	--	--	--	--	--	--	--
Unigene1106_JingChaoZuZhi2	217	23	14.5955	--	--	--	--	--	--	--	--
Unigene11070_JingChaoZuZhi2	1133	314	38.1638	gi|307212600|gb|EFN88315.1|	283	9.00E-75	Thioredoxin domain-containing protein 5 [Harpegnathos saltator]	sp|Q91W90|TXND5_MOUSE	213	2.00E-54	Thioredoxin domain-containing protein 5 OS=Mus musculus GN=Txndc5 PE=1 SV=2
Unigene11071_JingChaoZuZhi2	768	98	17.5718	--	--	--	--	--	--	--	--
Unigene11072_JingChaoZuZhi2	780	377	66.5577	gi|195119532|ref|XP_002004285.1|	83.2	3.00E-18	GI19695 [Drosophila mojavensis] >gi|193909353|gb|EDW08220.1| GI19695 [Drosophila mojavensis]	sp|Q05049|MUC1_XENLA	57	6.00E-10	Integumentary mucin C.1 (Fragment) OS=Xenopus laevis PE=2 SV=1
Unigene11073_JingChaoZuZhi2	252	13	7.1039	gi|115620372|ref|XP_001200099.1|	61.2	1.00E-08	PREDICTED: similar to endonuclease-reverse transcriptase [Strongylocentrotus purpuratus] >gi|115942391|ref|XP_001193811.1| PREDICTED: similar to endonuclease-reverse transcriptase [Strongylocentrotus purpuratus]	--	--	--	--
Unigene11074_JingChaoZuZhi2	389	27	9.558	gi|1195552|gb|AAA87954.1|	76.3	3.00E-13	phosphoinositide-specific phospholipase C [catfish]	sp|Q9BRC7|PLCD4_HUMAN	72	1.00E-12	1-phosphatidylinositol-4,5-bisphosphate phosphodiesterase delta-4 OS=Homo sapiens GN=PLCD4 PE=1 SV=1
Unigene11075_JingChaoZuZhi2	415	55	18.2501	--	--	--	--	--	--	--	--
Unigene11076_JingChaoZuZhi2	406	40	13.5671	--	--	--	--	--	--	--	--
Unigene11077_JingChaoZuZhi2	292	18	8.4887	--	--	--	--	--	--	--	--
Unigene11078_JingChaoZuZhi2	600	107	24.5575	gi|193716119|ref|XP_001943427.1|	65.5	1.00E-09	PREDICTED: similar to CG30387 CG30387-PC [Acyrthosiphon pisum]	sp|Q9WV06|ANKR2_MOUSE	65.5	2.00E-10	Ankyrin repeat domain-containing protein 2 OS=Mus musculus GN=Ankrd2 PE=2 SV=2
Unigene11079_JingChaoZuZhi2	1190	145	16.7793	--	--	--	--	--	--	--	--
Unigene1107_JingChaoZuZhi2	451	73	22.2894	--	--	--	--	--	--	--	--
Unigene11080_JingChaoZuZhi2	1394	121	11.9529	gi|72082338|ref|XP_796780.1|	283	9.00E-75	PREDICTED: similar to Mitochondrial carrier triple repeat 1 [Strongylocentrotus purpuratus] >gi|115940524|ref|XP_001186788.1| PREDICTED: similar to Mitochondrial carrier triple repeat 1 [Strongylocentrotus purpuratus]	sp|Q5HZI9|MCAR1_MOUSE	270	1.00E-71	Mitochondrial carrier triple repeat protein 1 OS=Mus musculus GN=Mcart1 PE=2 SV=1
Unigene11081_JingChaoZuZhi2	319	40	17.2672	--	--	--	--	--	--	--	--
Unigene11082_JingChaoZuZhi2	360	13	4.9727	--	--	--	--	--	--	--	--
Unigene11083_JingChaoZuZhi2	743	81	15.0123	--	--	--	--	--	--	--	--
Unigene11084_JingChaoZuZhi2	256	20	10.7583	--	--	--	--	--	--	--	--
Unigene11085_JingChaoZuZhi2	265	17	8.8339	--	--	--	--	--	--	--	--
Unigene11086_JingChaoZuZhi2	1632	361	30.4606	--	--	--	--	--	--	--	--
Unigene11087_JingChaoZuZhi2	276	8	3.9915	--	--	--	--	--	--	--	--
Unigene11088_JingChaoZuZhi2	1491	159	14.6849	gi|193643674|ref|XP_001948903.1|	172	7.00E-43	PREDICTED: similar to Y54G2A.42 [Acyrthosiphon pisum]	--	--	--	--
Unigene11089_JingChaoZuZhi2	550	98	24.5366	--	--	--	--	--	--	--	--
Unigene1108_JingChaoZuZhi2	288	43	20.5602	gi|37361880|gb|AAQ91053.1|	51.6	8.00E-06	LRRGT00097 [Rattus norvegicus]	--	--	--	--
Unigene11090_JingChaoZuZhi2	372	21	7.7737	--	--	--	--	--	--	--	--
Unigene11091_JingChaoZuZhi2	534	34	8.7678	gi|157118263|ref|XP_001653141.1|	104	1.00E-21	thyroid hormone receptor-associated protein [Aedes aegypti] >gi|108875767|gb|EAT39992.1| thyroid hormone receptor-associated protein [Aedes aegypti]	sp|Q9VW47|MED12_DROME	100	7.00E-21	Mediator of RNA polymerase II transcription subunit 12 OS=Drosophila melanogaster GN=kto PE=1 SV=2
Unigene11092_JingChaoZuZhi2	283	21	10.2184	--	--	--	--	--	--	--	--
Unigene11093_JingChaoZuZhi2	807	100	17.0639	--	--	--	--	--	--	--	--
Unigene11094_JingChaoZuZhi2	402	74	25.3488	--	--	--	--	--	--	--	--
Unigene11095_JingChaoZuZhi2	403	23	7.8591	gi|194766039|ref|XP_001965132.1|	51.6	8.00E-06	GF23569 [Drosophila ananassae] >gi|190617742|gb|EDV33266.1| GF23569 [Drosophila ananassae]	sp|P14918|EXTN_MAIZE	55.1	1.00E-07	Extensin OS=Zea mays GN=HRGP PE=2 SV=1
Unigene11096_JingChaoZuZhi2	294	11	5.1523	--	--	--	--	--	--	--	--
Unigene11097_JingChaoZuZhi2	803	163	27.9527	gi|197099306|ref|NP_001124620.1|	241	2.00E-62	RING finger protein 185 [Pongo abelii] >gi|75062067|sp|Q5RFK9.1|RN185_PONAB RecName: Full=RING finger protein 185	sp|Q5RFK9|RN185_PONAB	241	3.00E-63	RING finger protein 185 OS=Pongo abelii GN=RNF185 PE=2 SV=1
Unigene11098_JingChaoZuZhi2	328	11	4.6182	--	--	--	--	--	--	--	--
Unigene11099_JingChaoZuZhi2	309	14	6.2391	--	--	--	--	--	--	--	--
Unigene1109_JingChaoZuZhi2	221	6	3.7386	gi|170579958|ref|XP_001895056.1|	75.9	4.00E-13	Histidine-rich glycoprotein precursor [Brugia malayi]	sp|Q69566|U88_HHV6U	66.2	6.00E-11	Uncharacterized protein U88 OS=Human herpesvirus 6A (strain Uganda-1102) GN=U88 PE=4 SV=1
Unigene110_JingChaoZuZhi2	456	61	18.4212	--	--	--	--	sp|P38479|ABP1_SACEX	49.7	7.00E-06	Actin-binding protein OS=Saccharomyces exiguus GN=ABP1 PE=3 SV=1
Unigene11100_JingChaoZuZhi2	324	12	5.1002	--	--	--	--	--	--	--	--
Unigene11101_JingChaoZuZhi2	286	14	6.7408	--	--	--	--	--	--	--	--
Unigene11102_JingChaoZuZhi2	633	108	23.4948	--	--	--	--	--	--	--	--
Unigene11103_JingChaoZuZhi2	721	59	11.2686	gi|51871616|ref|NP_001004113.1|	116	9.00E-25	cytosolic carboxypeptidase-like protein 5 [Danio rerio] >gi|82181672|sp|Q68EI3.1|CBPC5_DANRE RecName: Full=Cytosolic carboxypeptidase-like protein 5; AltName: Full=ATP/GTP-binding protein-like 5 >gi|51327323|gb|AAH80248.1| ATP/GTP binding protein-like 5 [Danio rerio]	sp|Q68EI3|CBPC5_DANRE	116	2.00E-25	Cytosolic carboxypeptidase-like protein 5 OS=Danio rerio GN=agbl5 PE=2 SV=1
Unigene11104_JingChaoZuZhi2	479	53	15.2367	--	--	--	--	--	--	--	--
Unigene11105_JingChaoZuZhi2	557	54	13.3503	gi|170595123|ref|XP_001902255.1|	71.6	1.00E-11	U88 [Brugia malayi]	sp|Q69566|U88_HHV6U	65.9	2.00E-10	Uncharacterized protein U88 OS=Human herpesvirus 6A (strain Uganda-1102) GN=U88 PE=4 SV=1
Unigene11106_JingChaoZuZhi2	260	6	3.1778	--	--	--	--	--	--	--	--
Unigene11107_JingChaoZuZhi2	267	23	11.8623	--	--	--	--	--	--	--	--
Unigene11108_JingChaoZuZhi2	335	78	32.0628	--	--	--	--	--	--	--	--
Unigene11109_JingChaoZuZhi2	290	10	4.7485	--	--	--	--	--	--	--	--
Unigene1110_JingChaoZuZhi2	290	87	41.3117	--	--	--	--	--	--	--	--
Unigene11110_JingChaoZuZhi2	497	79	21.8888	--	--	--	--	--	--	--	--
Unigene11111_JingChaoZuZhi2	277	10	4.9713	gi|307211606|gb|EFN87655.1|	84.3	1.00E-32	PH and SEC7 domain-containing protein 3 [Harpegnathos saltator]	sp|Q2PFD7|PSD3_MOUSE	67.8	3.00E-25	PH and SEC7 domain-containing protein 3 OS=Mus musculus GN=Psd3 PE=1 SV=2
Unigene11112_JingChaoZuZhi2	440	34	10.6409	gi|308504173|ref|XP_003114270.1|	82.8	3.00E-15	CRE-MYO-3 protein [Caenorhabditis remanei] >gi|308261655|gb|EFP05608.1| CRE-MYO-3 protein [Caenorhabditis remanei]	sp|P12844|MYO3_CAEEL	82.8	7.00E-16	Myosin-3 OS=Caenorhabditis elegans GN=myo-3 PE=1 SV=1
Unigene11113_JingChaoZuZhi2	374	36	13.2551	--	--	--	--	--	--	--	--
Unigene11114_JingChaoZuZhi2	428	34	10.9392	--	--	--	--	--	--	--	--
Unigene11115_JingChaoZuZhi2	289	19	9.0533	--	--	--	--	--	--	--	--
Unigene11116_JingChaoZuZhi2	268	10	5.1383	gi|170043092|ref|XP_001849235.1|	130	1.00E-29	leucine-rich transmembrane protein [Culex quinquefasciatus] >gi|167866512|gb|EDS29895.1| leucine-rich transmembrane protein [Culex quinquefasciatus]	sp|Q5GJ04|FSHR_FELCA	113	4.00E-25	Follicle-stimulating hormone receptor OS=Felis catus GN=FSHR PE=2 SV=1
Unigene11117_JingChaoZuZhi2	766	141	25.3479	--	--	--	--	--	--	--	--
Unigene11118_JingChaoZuZhi2	327	16	6.7379	--	--	--	--	--	--	--	--
Unigene11119_JingChaoZuZhi2	479	180	51.7474	gi|6946697|emb|CAB72317.1|	210	2.00E-53	aconitase [Daphnia pulex]	sp|P20004|ACON_BOVIN	182	1.00E-45	Aconitate hydratase, mitochondrial OS=Bos taurus GN=ACO2 PE=1 SV=4
Unigene1111_JingChaoZuZhi2	2771	895	44.4773	gi|307166641|gb|EFN60653.1|	157	2.00E-36	Integrin alpha-PS1 [Camponotus floridanus]	sp|Q24247|ITA1_DROME	108	3.00E-22	Integrin alpha-PS1 OS=Drosophila melanogaster GN=mew PE=1 SV=2
Unigene11120_JingChaoZuZhi2	417	52	17.1719	gi|189242016|ref|XP_001807518.1|	196	3.00E-49	PREDICTED: similar to Zinc carboxypeptidase family protein [Tribolium castaneum]	sp|P37892|CBPE_LOPAM	151	1.00E-36	Carboxypeptidase E OS=Lophius americanus GN=cpe PE=2 SV=1
Unigene11121_JingChaoZuZhi2	292	25	11.7899	gi|74096385|ref|NP_001027880.1|	45.8	2.00E-07	XK-related protein 7a [Takifugu rubripes] >gi|46948413|gb|AAT07118.1| XK-related protein 7a [Takifugu rubripes]	--	--	--	--
Unigene11122_JingChaoZuZhi2	281	17	8.3309	gi|13539605|emb|CAC35733.1|	59.3	4.00E-08	cyclophilin-RNA interacting protein [Paramecium tetraurelia]	sp|A5E4P1|PXR1_LODEL	52.8	7.00E-07	Protein PXR1 OS=Lodderomyces elongisporus GN=PXR1 PE=3 SV=1
Unigene11123_JingChaoZuZhi2	333	9	3.7218	--	--	--	--	--	--	--	--
Unigene11124_JingChaoZuZhi2	533	53	13.6931	--	--	--	--	--	--	--	--
Unigene11125_JingChaoZuZhi2	3126	761	33.5234	gi|110751273|ref|XP_392215.3|	475	1.00E-132	PREDICTED: similar to CG30069-PA [Apis mellifera]	sp|Q7G6K7|FH3_ORYSJ	58.2	8.00E-14	Formin-like protein 3 OS=Oryza sativa subsp. japonica GN=FH3 PE=2 SV=2
Unigene11126_JingChaoZuZhi2	602	49	11.2086	gi|195449900|ref|XP_002072275.1|	235	7.00E-61	GK22766 [Drosophila willistoni] >gi|194168360|gb|EDW83261.1| GK22766 [Drosophila willistoni]	--	--	--	--
Unigene11127_JingChaoZuZhi2	1046	359	47.2623	--	--	--	--	--	--	--	--
Unigene11128_JingChaoZuZhi2	514	44	11.788	--	--	--	--	--	--	--	--
Unigene11129_JingChaoZuZhi2	349	17	6.7077	--	--	--	--	--	--	--	--
Unigene1112_JingChaoZuZhi2	1072	123	15.8002	--	--	--	--	--	--	--	--
Unigene11130_JingChaoZuZhi2	440	46	14.3965	gi|116284392|ref|NP_002448.2|	54.3	1.00E-06	mucin-2 precursor [Homo sapiens]	sp|Q02817|MUC2_HUMAN	53.5	4.00E-07	Mucin-2 OS=Homo sapiens GN=MUC2 PE=1 SV=2
Unigene11131_JingChaoZuZhi2	410	53	17.801	--	--	--	--	--	--	--	--
Unigene11132_JingChaoZuZhi2	346	19	7.5619	--	--	--	--	--	--	--	--
Unigene11133_JingChaoZuZhi2	487	51	14.4209	gi|122096695|sp|Q1ZXD6.1|ROCO5_DICDI	57.8	1.00E-07	RecName: Full=Probable serine/threonine-protein kinase roco5; AltName: Full=Ras of complex proteins and C-terminal of roc 5	sp|Q1ZXD6|ROCO5_DICDI	57.8	3.00E-08	Probable serine/threonine-protein kinase roco5 OS=Dictyostelium discoideum GN=roco5 PE=3 SV=1
Unigene11134_JingChaoZuZhi2	1388	251	24.9021	gi|97180301|sp|Q95JC9.2|PRP_PIG	64.3	1.00E-11	RecName: Full=Basic proline-rich protein; Contains: RecName: Full=Proline-rich peptide SP-A; Short=PRP-SP-A; Contains: RecName: Full=Proline-rich peptide SP-B; Short=PRP-SP-B; Contains: RecName: Full=Parotid hormone; AltName: Full=PH-Ab; Flags: Precursor	sp|Q95JC9|PRP_PIG	64.3	2.00E-12	Basic proline-rich protein OS=Sus scrofa PE=1 SV=2
Unigene11135_JingChaoZuZhi2	754	62	11.3233	gi|33086440|gb|AAP92532.1|	87	6.00E-16	Ab1-013 [Rattus norvegicus] >gi|149025437|gb|EDL81804.1| rCG63023 [Rattus norvegicus]	sp|P13816|GARP_PLAFF	58.2	5.00E-13	Glutamic acid-rich protein OS=Plasmodium falciparum (isolate FC27 / Papua New Guinea) GN=GARP PE=4 SV=1
Unigene11136_JingChaoZuZhi2	730	56	10.5637	gi|154344451|ref|XP_001568167.1|	54.3	4.00E-06	proteophosphoglycan ppg4 [Leishmania braziliensis MHOM/BR/75/M2904] >gi|134065504|emb|CAM43271.1| proteophosphoglycan ppg4 [Leishmania braziliensis]	--	--	--	--
Unigene11137_JingChaoZuZhi2	306	16	7.2003	--	--	--	--	--	--	--	--
Unigene11138_JingChaoZuZhi2	730	150	28.2957	gi|115931431|ref|XP_001185218.1|	102	2.00E-20	PREDICTED: similar to Syne-1B [Strongylocentrotus purpuratus]	sp|Q75JC9|Y8484_DICDI	89.4	2.00E-17	Uncharacterized protein DDB_G0271670 OS=Dictyostelium discoideum GN=DDB_G0271670 PE=4 SV=1
Unigene11139_JingChaoZuZhi2	338	8	3.2593	gi|24817580|emb|CAD21657.2|	107	1.00E-22	C. elegans protein Y105E8A.3, partially confirmed by transcript evidence [Caenorhabditis elegans]	sp|Q28CE7|ZNT5_XENTR	99	8.00E-21	Zinc transporter 5 OS=Xenopus tropicalis GN=slc30a5 PE=2 SV=1
Unigene1113_JingChaoZuZhi2	479	173	49.735	--	--	--	--	--	--	--	--
Unigene11140_JingChaoZuZhi2	533	38	9.8177	--	--	--	--	--	--	--	--
Unigene11141_JingChaoZuZhi2	275	35	17.5262	gi|37654230|gb|AAQ96220.1|	68.2	8.00E-11	LRRGT00007 [Rattus norvegicus]	sp|O73590|ZFHX4_CHICK	60.8	2.00E-09	Zinc finger homeobox protein 4 OS=Gallus gallus GN=ZFHX4 PE=2 SV=2
Unigene11142_JingChaoZuZhi2	454	33	10.0094	gi|301623781|ref|XP_002941190.1|	64.7	9.00E-10	PREDICTED: UPF0740 protein C1orf192 homolog [Xenopus (Silurana) tropicalis]	sp|Q6P8X9|CA192_MOUSE	60.5	4.00E-09	UPF0740 protein C1orf192 homolog OS=Mus musculus PE=2 SV=1
Unigene11143_JingChaoZuZhi2	418	55	18.1192	--	--	--	--	--	--	--	--
Unigene11144_JingChaoZuZhi2	1280	537	57.7718	--	--	--	--	--	--	--	--
Unigene11145_JingChaoZuZhi2	266	13	6.73	--	--	--	--	--	--	--	--
Unigene11146_JingChaoZuZhi2	466	26	7.6831	gi|301610883|ref|XP_002934979.1|	120	5.00E-29	PREDICTED: cytoplasmic dynein 2 heavy chain 1 [Xenopus (Silurana) tropicalis]	sp|Q27802|DYHC2_TRIGR	115	2.00E-26	Cytoplasmic dynein 2 heavy chain 1 OS=Tripneustes gratilla GN=DYH1B PE=2 SV=2
Unigene11147_JingChaoZuZhi2	492	19	5.3179	--	--	--	--	--	--	--	--
Unigene11148_JingChaoZuZhi2	982	104	14.5839	gi|73981226|ref|XP_540261.2|	143	7.00E-64	PREDICTED: similar to WD-repeat protein 3 [Canis familiaris]	sp|Q9UNX4|WDR3_HUMAN	140	7.00E-64	WD repeat-containing protein 3 OS=Homo sapiens GN=WDR3 PE=1 SV=1
Unigene11149_JingChaoZuZhi2	406	15	5.0876	--	--	--	--	--	--	--	--
Unigene1114_JingChaoZuZhi2	281	13	6.3707	gi|170575217|ref|XP_001893148.1|	53.5	2.00E-06	Hypothetical 17.1 kDa protein in PUR5 3'region [Brugia malayi]	--	--	--	--
Unigene11150_JingChaoZuZhi2	259	13	6.9119	gi|291241700|ref|XP_002740750.1|	144	7.00E-34	PREDICTED: GEX Interacting protein family member (gei-7)-like [Saccoglossus kowalevskii]	sp|Q8T2K9|MASY_DICDI	107	2.00E-23	Malate synthase OS=Dictyostelium discoideum GN=masA PE=2 SV=2
Unigene11151_JingChaoZuZhi2	274	17	8.5438	gi|307203097|gb|EFN82277.1|	70.5	2.00E-11	Kinesin-like protein KIF21B [Harpegnathos saltator]	sp|Q9QXL2|KI21A_MOUSE	67.4	3.00E-11	Kinesin-like protein KIF21A OS=Mus musculus GN=Kif21a PE=1 SV=2
Unigene11152_JingChaoZuZhi2	660	85	17.7348	--	--	--	--	--	--	--	--
Unigene11153_JingChaoZuZhi2	346	34	13.5318	gi|158295100|ref|XP_316017.4|	66.6	2.00E-10	AGAP005973-PA [Anopheles gambiae str. PEST] >gi|157015874|gb|EAA11389.4| AGAP005973-PA [Anopheles gambiae str. PEST]	sp|Q86BS6|METL_DROME	63.2	5.00E-10	Methyltransferase-like protein OS=Drosophila melanogaster GN=metl PE=1 SV=2
Unigene11154_JingChaoZuZhi2	394	20	6.9901	--	--	--	--	--	--	--	--
Unigene11155_JingChaoZuZhi2	782	152	26.7663	--	--	--	--	--	--	--	--
Unigene11156_JingChaoZuZhi2	293	9	4.2299	--	--	--	--	--	--	--	--
Unigene11157_JingChaoZuZhi2	376	46	16.847	--	--	--	--	--	--	--	--
Unigene11158_JingChaoZuZhi2	600	153	35.1149	gi|194220942|ref|XP_001503450.2|	101	1.00E-20	PREDICTED: similar to retinol dehydrogenase 14 (all-trans and 9-cis) [Equus caballus]	sp|Q9ERI6|RDH14_MOUSE	99.8	1.00E-20	Retinol dehydrogenase 14 OS=Mus musculus GN=Rdh14 PE=1 SV=1
Unigene11159_JingChaoZuZhi2	266	7	3.6238	--	--	--	--	--	--	--	--
Unigene1115_JingChaoZuZhi2	881	167	26.1031	gi|25152832|ref|NP_741365.1|	67.8	5.00E-10	Prion-like-(Q/N-rich)-domain-bearing protein family member (pqn-75) [Caenorhabditis elegans] >gi|14916375|gb|AAC48255.2| Prion-like-(q/n-rich)-domain-bearing protein protein 75, isoform a, partially confirmed by transcript evidence [Caenorhabditis elegans]	sp|A3AB67|FH16_ORYSJ	64.3	1.00E-09	Formin-like protein 16 OS=Oryza sativa subsp. japonica GN=FH16 PE=2 SV=1
Unigene11160_JingChaoZuZhi2	270	14	7.1403	--	--	--	--	--	--	--	--
Unigene11161_JingChaoZuZhi2	403	21	7.1757	--	--	--	--	--	--	--	--
Unigene11162_JingChaoZuZhi2	276	21	10.4776	gi|189242327|ref|XP_001806986.1|	60.8	1.00E-08	PREDICTED: similar to gag-pol polyprotein [Tribolium castaneum]	--	--	--	--
Unigene11163_JingChaoZuZhi2	478	37	10.6592	gi|221132221|ref|XP_002155614.1|	85.9	5.00E-16	PREDICTED: similar to polyprotein [Hydra magnipapillata]	--	--	--	--
Unigene11164_JingChaoZuZhi2	524	34	8.9351	gi|118601178|ref|NP_001073029.1|	99.4	6.00E-28	nicotinic acetylcholine receptor alpha3 subunit [Apis mellifera] >gi|68165862|gb|AAY87891.1| nicotinic acetylcholine receptor alpha3 subunit [Apis mellifera]	sp|P91766|ACH1_MANSE	91.3	4.00E-23	Acetylcholine receptor subunit alpha-like OS=Manduca sexta GN=ARA1 PE=2 SV=1
Unigene11165_JingChaoZuZhi2	309	41	18.2716	--	--	--	--	--	--	--	--
Unigene11166_JingChaoZuZhi2	291	7	3.3125	--	--	--	--	--	--	--	--
Unigene11167_JingChaoZuZhi2	674	45	9.194	--	--	--	--	--	--	--	--
Unigene11168_JingChaoZuZhi2	510	71	19.1708	--	--	--	--	--	--	--	--
Unigene11169_JingChaoZuZhi2	922	81	12.0978	gi|224084362|ref|XP_002191904.1|	124	5.00E-27	PREDICTED: similar to papillary renal cell carcinoma (translocation-associated), partial [Taeniopygia guttata]	sp|Q92733|PRCC_HUMAN	123	2.00E-27	Proline-rich protein PRCC OS=Homo sapiens GN=PRCC PE=1 SV=1
Unigene1116_JingChaoZuZhi2	290	9	4.2736	--	--	--	--	--	--	--	--
Unigene11170_JingChaoZuZhi2	294	19	8.8993	--	--	--	--	--	--	--	--
Unigene11171_JingChaoZuZhi2	259	14	7.4435	--	--	--	--	--	--	--	--
Unigene11172_JingChaoZuZhi2	321	38	16.3016	gi|170594753|ref|XP_001902118.1|	59.7	3.00E-08	T-cell receptor beta chain ANA 11 [Brugia malayi]	sp|Q69566|U88_HHV6U	49.7	6.00E-06	Uncharacterized protein U88 OS=Human herpesvirus 6A (strain Uganda-1102) GN=U88 PE=4 SV=1
Unigene11173_JingChaoZuZhi2	593	42	9.7532	--	--	--	--	--	--	--	--
Unigene11174_JingChaoZuZhi2	309	47	20.9455	--	--	--	--	--	--	--	--
Unigene11175_JingChaoZuZhi2	381	26	9.3972	gi|194759424|ref|XP_001961949.1|	130	1.00E-29	GF15226 [Drosophila ananassae] >gi|190615646|gb|EDV31170.1| GF15226 [Drosophila ananassae]	sp|Q8BHK3|S36A2_MOUSE	93.2	5.00E-19	Proton-coupled amino acid transporter 2 OS=Mus musculus GN=Slc36a2 PE=1 SV=1
Unigene11176_JingChaoZuZhi2	349	38	14.9937	--	--	--	--	--	--	--	--
Unigene11177_JingChaoZuZhi2	344	18	7.2055	--	--	--	--	--	--	--	--
Unigene11178_JingChaoZuZhi2	351	29	11.3774	--	--	--	--	--	--	--	--
Unigene11179_JingChaoZuZhi2	1320	227	23.6812	--	--	--	--	--	--	--	--
Unigene1117_JingChaoZuZhi2	289	8	3.8119	--	--	--	--	--	--	--	--
Unigene11180_JingChaoZuZhi2	563	25	6.1148	gi|115698947|ref|XP_798218.2|	79.3	7.00E-14	PREDICTED: similar to cache domain containing 1 [Strongylocentrotus purpuratus] >gi|115950509|ref|XP_001192500.1| PREDICTED: similar to cache domain containing 1 [Strongylocentrotus purpuratus]	sp|Q5VU97|CAHD1_HUMAN	71.2	1.00E-12	VWFA and cache domain-containing protein 1 OS=Homo sapiens GN=CACHD1 PE=1 SV=2
Unigene11181_JingChaoZuZhi2	366	44	16.5548	gi|76363804|ref|XP_888613.1|	40	6.00E-06	hypothetical protein [Leishmania major strain Friedlin] >gi|12311828|emb|CAC22646.1| hypothetical transmembrane protein L8032.05a [Leishmania major strain Friedlin]	--	--	--	--
Unigene11182_JingChaoZuZhi2	443	53	16.4749	--	--	--	--	--	--	--	--
Unigene11183_JingChaoZuZhi2	499	98	27.0444	--	--	--	--	--	--	--	--
Unigene11184_JingChaoZuZhi2	847	85	13.8193	gi|259016158|sp|Q17RH7.2|TPRXL_HUMAN	55.5	2.00E-06	RecName: Full=Putative protein TPRXL	sp|P08640|MUC1_YEAST	52	5.00E-06	Flocculation protein FLO11 OS=Saccharomyces cerevisiae GN=MUC1 PE=1 SV=2
Unigene11185_JingChaoZuZhi2	316	89	38.7842	--	--	--	--	--	--	--	--
Unigene11186_JingChaoZuZhi2	1258	189	20.6887	gi|118099263|ref|XP_415503.2|	285	3.00E-75	PREDICTED: similar to Coenzyme Q4 homolog (yeast) [Gallus gallus]	sp|B4LE89|COQ4_DROVI	276	2.00E-73	Ubiquinone biosynthesis protein COQ4 homolog, mitochondrial OS=Drosophila virilis GN=GJ13024 PE=3 SV=1
Unigene11187_JingChaoZuZhi2	406	91	30.8651	--	--	--	--	--	--	--	--
Unigene11188_JingChaoZuZhi2	3774	989	36.0866	gi|193669495|ref|XP_001951758.1|	281	1.00E-73	PREDICTED: similar to IL-16, partial [Acyrthosiphon pisum]	sp|O62675|IL16_MACMU	189	2.00E-46	Pro-interleukin-16 OS=Macaca mulatta GN=IL16 PE=2 SV=1
Unigene11189_JingChaoZuZhi2	304	29	13.1364	--	--	--	--	--	--	--	--
Unigene1118_JingChaoZuZhi2	445	127	39.3003	gi|158294413|ref|XP_315584.3|	62.8	4.00E-17	AGAP005576-PA [Anopheles gambiae str. PEST] >gi|157015553|gb|EAA11760.4| AGAP005576-PA [Anopheles gambiae str. PEST]	sp|Q3SYZ4|SYDC_BOVIN	58.5	1.00E-08	Aspartyl-tRNA synthetase, cytoplasmic OS=Bos taurus GN=DARS PE=2 SV=1
Unigene11190_JingChaoZuZhi2	554	37	9.1969	gi|194751549|ref|XP_001958088.1|	101	1.00E-20	GF10737 [Drosophila ananassae] >gi|190625370|gb|EDV40894.1| GF10737 [Drosophila ananassae]	sp|Q9VUM0|MSH6_DROME	97.4	5.00E-20	Probable DNA mismatch repair protein Msh6 OS=Drosophila melanogaster GN=Msh6 PE=1 SV=2
Unigene11191_JingChaoZuZhi2	357	35	13.5006	--	--	--	--	--	--	--	--
Unigene11192_JingChaoZuZhi2	1183	143	16.6457	--	--	--	--	--	--	--	--
Unigene11193_JingChaoZuZhi2	835	108	17.811	--	--	--	--	--	--	--	--
Unigene11194_JingChaoZuZhi2	1048	420	55.1874	gi|156552772|ref|XP_001602426.1|	362	1.00E-98	PREDICTED: similar to CG18076-PB [Nasonia vitripennis]	sp|Q9UPN3|MACF1_HUMAN	302	3.00E-81	Microtubule-actin cross-linking factor 1, isoforms 1/2/3/5 OS=Homo sapiens GN=MACF1 PE=1 SV=3
Unigene11195_JingChaoZuZhi2	501	56	15.3922	gi|149408945|ref|XP_001509982.1|	62	8.00E-09	PREDICTED: similar to endo-beta-N-acetylglucosaminidase [Ornithorhynchus anatinus]	sp|Q8STA9|Y5G8_ENCCU	52	2.00E-06	UPF0329 protein ECU05_1680/ECU11_0050 OS=Encephalitozoon cuniculi GN=ECU05_1680 PE=3 SV=1
Unigene11196_JingChaoZuZhi2	276	11	5.4883	--	--	--	--	--	--	--	--
Unigene11197_JingChaoZuZhi2	327	19	8.0012	--	--	--	--	--	--	--	--
Unigene11198_JingChaoZuZhi2	970	128	18.1715	--	--	--	--	--	--	--	--
Unigene11199_JingChaoZuZhi2	454	37	11.2227	--	--	--	--	--	--	--	--
Unigene1119_JingChaoZuZhi2	503	88	24.0916	--	--	--	--	--	--	--	--
Unigene111_JingChaoZuZhi2	661	164	34.166	gi|149675209|gb|ABR27686.1|	187	3.00E-46	cuticle proprotein proCP5.1 [Callinectes sapidus]	sp|P81588|CUC10_CANPG	76.6	1.00E-13	Cuticle protein CP498 OS=Cancer pagurus PE=1 SV=1
Unigene11200_JingChaoZuZhi2	314	7	3.0699	--	--	--	--	--	--	--	--
Unigene11201_JingChaoZuZhi2	422	23	7.5053	--	--	--	--	--	--	--	--
Unigene11202_JingChaoZuZhi2	272	14	7.0878	--	--	--	--	--	--	--	--
Unigene11203_JingChaoZuZhi2	280	10	4.9181	--	--	--	--	--	--	--	--
Unigene11204_JingChaoZuZhi2	470	14	4.1019	--	--	--	--	--	--	--	--
Unigene11205_JingChaoZuZhi2	317	14	6.0816	--	--	--	--	--	--	--	--
Unigene11206_JingChaoZuZhi2	471	53	15.4955	gi|62361847|gb|AAX81453.1|	126	2.00E-42	vermilion-like [Schistocerca americana]	sp|Q95NN1|T23O_TRICA	108	8.00E-42	Tryptophan 2,3-dioxygenase OS=Tribolium castaneum PE=2 SV=1
Unigene11207_JingChaoZuZhi2	446	102	31.4932	--	--	--	--	--	--	--	--
Unigene11208_JingChaoZuZhi2	375	62	22.7673	--	--	--	--	--	--	--	--
Unigene11209_JingChaoZuZhi2	1014	136	18.4694	gi|307169193|gb|EFN62009.1|	118	2.00E-42	Platelet glycoprotein V [Camponotus floridanus]	sp|P40197|GPV_HUMAN	60.8	1.00E-16	Platelet glycoprotein V OS=Homo sapiens GN=GP5 PE=1 SV=1
Unigene1120_JingChaoZuZhi2	231	29	17.2877	--	--	--	--	--	--	--	--
Unigene11210_JingChaoZuZhi2	311	33	14.6119	--	--	--	--	--	--	--	--
Unigene11211_JingChaoZuZhi2	649	58	12.3065	gi|119627579|gb|EAX07174.1|	55.8	1.00E-06	hCG1793893 [Homo sapiens]	sp|Q9LJ64|PLRX1_ARATH	57.4	8.00E-08	Pollen-specific leucine-rich repeat extensin-like protein 1 OS=Arabidopsis thaliana GN=PEX1 PE=2 SV=1
Unigene11212_JingChaoZuZhi2	378	16	5.8288	gi|158289827|ref|XP_311463.4|	179	2.00E-44	AGAP010481-PA [Anopheles gambiae str. PEST] >gi|157018345|gb|EAA07088.4| AGAP010481-PA [Anopheles gambiae str. PEST]	sp|P48067|SC6A9_HUMAN	174	2.00E-43	Sodium- and chloride-dependent glycine transporter 1 OS=Homo sapiens GN=SLC6A9 PE=2 SV=3
Unigene11213_JingChaoZuZhi2	713	122	23.5625	--	--	--	--	--	--	--	--
Unigene11214_JingChaoZuZhi2	556	63	15.6033	gi|224071091|ref|XP_002190122.1|	97.1	1.00E-32	PREDICTED: similar to eukaryotic translation initiation factor 2B, subunit 1 alpha, 26kDa [Taeniopygia guttata]	sp|Q64270|EI2BA_RAT	93.2	3.00E-31	Translation initiation factor eIF-2B subunit alpha OS=Rattus norvegicus GN=Eif2b1 PE=2 SV=1
Unigene11215_JingChaoZuZhi2	2592	549	29.1668	gi|189238003|ref|XP_969912.2|	202	7.00E-50	PREDICTED: similar to GA22134-PA [Tribolium castaneum]	sp|A6NN14|ZN729_HUMAN	92	2.00E-17	Zinc finger protein 729 OS=Homo sapiens GN=ZNF729 PE=2 SV=3
Unigene11216_JingChaoZuZhi2	311	19	8.4129	--	--	--	--	--	--	--	--
Unigene11217_JingChaoZuZhi2	313	12	5.2794	--	--	--	--	--	--	--	--
Unigene11218_JingChaoZuZhi2	322	55	23.5212	--	--	--	--	--	--	--	--
Unigene11219_JingChaoZuZhi2	462	48	14.3071	gi|261331295|emb|CBH14285.1|	63.9	2.00E-09	T. brucei spp.-specific protein [Trypanosoma brucei gambiense DAL972]	sp|Q69566|U88_HHV6U	60.1	6.00E-09	Uncharacterized protein U88 OS=Human herpesvirus 6A (strain Uganda-1102) GN=U88 PE=4 SV=1
Unigene1121_JingChaoZuZhi2	1222	317	35.7223	gi|158297979|ref|XP_001231096.2|	68.2	6.00E-10	AGAP004734-PA [Anopheles gambiae str. PEST] >gi|157014587|gb|EAU76230.2| AGAP004734-PA [Anopheles gambiae str. PEST]	sp|O10341|Y091_NPVOP	59.7	4.00E-08	Uncharacterized 29.3 kDa protein OS=Orgyia pseudotsugata multicapsid polyhedrosis virus GN=ORF92 PE=4 SV=1
Unigene11220_JingChaoZuZhi2	952	182	26.3261	--	--	--	--	--	--	--	--
Unigene11221_JingChaoZuZhi2	514	61	16.3425	--	--	--	--	--	--	--	--
Unigene11222_JingChaoZuZhi2	336	20	8.1968	--	--	--	--	--	--	--	--
Unigene11223_JingChaoZuZhi2	302	64	29.1827	--	--	--	--	--	--	--	--
Unigene11224_JingChaoZuZhi2	728	45	8.512	gi|193652690|ref|XP_001946893.1|	216	5.00E-69	PREDICTED: similar to CG12581 CG12581-PA [Acyrthosiphon pisum]	--	--	--	--
Unigene11225_JingChaoZuZhi2	1252	490	53.8944	gi|167534082|ref|XP_001748719.1|	57.8	9.00E-07	hypothetical protein [Monosiga brevicollis MX1] >gi|163772681|gb|EDQ86329.1| predicted protein [Monosiga brevicollis MX1]	--	--	--	--
Unigene11226_JingChaoZuZhi2	1235	258	28.7677	--	--	--	--	--	--	--	--
Unigene11227_JingChaoZuZhi2	328	30	12.595	gi|221111577|ref|XP_002161655.1|	53.9	2.00E-06	PREDICTED: hypothetical protein, partial [Hydra magnipapillata]	--	--	--	--
Unigene11228_JingChaoZuZhi2	488	73	20.5994	--	--	--	--	--	--	--	--
Unigene11229_JingChaoZuZhi2	1513	356	32.4013	gi|225715050|gb|ACO13371.1|	130	1.00E-28	L-seryl-tRNASec kinase [Esox lucius]	sp|Q8BP74|PSTK_MOUSE	118	1.00E-25	L-seryl-tRNA(Sec) kinase OS=Mus musculus GN=Pstk PE=1 SV=2
Unigene1122_JingChaoZuZhi2	233	10	5.9101	--	--	--	--	--	--	--	--
Unigene11230_JingChaoZuZhi2	429	46	14.7656	gi|256092826|ref|XP_002582078.1|	177	1.00E-43	dynein heavy chain [Schistosoma mansoni]	sp|Q63170|DYH7_RAT	154	2.00E-37	Dynein heavy chain 7, axonemal OS=Rattus norvegicus GN=Dnah7 PE=2 SV=2
Unigene11231_JingChaoZuZhi2	394	63	22.0189	--	--	--	--	--	--	--	--
Unigene11232_JingChaoZuZhi2	336	18	7.3771	gi|123439757|ref|XP_001310646.1|	67.8	1.00E-10	smooth muscle caldesmon [Trichomonas vaginalis G3]	sp|A6QLA6|CAF1A_BOVIN	62	1.00E-09	Chromatin assembly factor 1 subunit A OS=Bos taurus GN=CHAF1A PE=2 SV=1
Unigene11233_JingChaoZuZhi2	310	15	6.6632	--	--	--	--	--	--	--	--
Unigene11234_JingChaoZuZhi2	394	45	15.7278	--	--	--	--	--	--	--	--
Unigene11235_JingChaoZuZhi2	1509	269	24.5479	gi|91086585|ref|XP_973508.1|	164	9.00E-39	PREDICTED: similar to d-alanyl-d-alanine carboxypeptidase [Tribolium castaneum]	sp|Q8K2L8|TTC15_MOUSE	122	5.00E-27	Tetratricopeptide repeat protein 15 OS=Mus musculus GN=Ttc15 PE=1 SV=1
Unigene11236_JingChaoZuZhi2	303	16	7.2716	--	--	--	--	--	--	--	--
Unigene11237_JingChaoZuZhi2	506	93	25.3095	gi|307171350|gb|EFN63248.1|	247	1.00E-64	Putative RNA-binding protein 16 [Camponotus floridanus]	sp|Q9UPN6|RBM16_HUMAN	214	2.00E-55	RNA-binding protein 16 OS=Homo sapiens GN=RBM16 PE=1 SV=1
Unigene11238_JingChaoZuZhi2	285	11	5.315	--	--	--	--	--	--	--	--
Unigene11239_JingChaoZuZhi2	469	17	4.9915	--	--	--	--	--	--	--	--
Unigene1123_JingChaoZuZhi2	310	17	7.5516	gi|38524610|ref|NP_942566.1|	54.7	1.00E-06	DNA binding protein with his-thr domain [Mus musculus] >gi|26985370|gb|AAN86346.1| SPOT2 [Mus musculus]	--	--	--	--
Unigene11240_JingChaoZuZhi2	338	25	10.1853	gi|224051885|ref|XP_002200643.1|	52	6.00E-06	PREDICTED: dishevelled associated activator of morphogenesis 1 isoform 2 [Taeniopygia guttata]	--	--	--	--
Unigene11241_JingChaoZuZhi2	750	131	24.0526	gi|61658801|gb|AAX49608.1|	98.6	2.00E-19	RPGR [Phodopus sungorus]	sp|Q06666|T2_MOUSE	80.9	8.00E-15	Octapeptide-repeat protein T2 OS=Mus musculus GN=Srst PE=2 SV=1
Unigene11242_JingChaoZuZhi2	378	46	16.7578	--	--	--	--	--	--	--	--
Unigene11243_JingChaoZuZhi2	1441	248	23.6995	--	--	--	--	--	--	--	--
Unigene11244_JingChaoZuZhi2	928	180	26.7101	--	--	--	--	--	--	--	--
Unigene11245_JingChaoZuZhi2	922	290	43.3131	--	--	--	--	--	--	--	--
Unigene11246_JingChaoZuZhi2	599	79	18.1615	--	--	--	--	--	--	--	--
Unigene11247_JingChaoZuZhi2	437	46	14.4953	--	--	--	--	--	--	--	--
Unigene11248_JingChaoZuZhi2	1075	184	23.5701	gi|290462395|gb|ADD24245.1|	450	1.00E-129	Ubiquitin-like modifier-activating enzyme 5 [Lepeophtheirus salmonis]	sp|Q3KQ23|UBA5_XENLA	451	5.00E-129	Ubiquitin-like modifier-activating enzyme 5 OS=Xenopus laevis GN=uba5 PE=2 SV=1
Unigene11249_JingChaoZuZhi2	271	15	7.6221	--	--	--	--	--	--	--	--
Unigene1124_JingChaoZuZhi2	227	51	30.9383	--	--	--	--	--	--	--	--
Unigene11250_JingChaoZuZhi2	1041	190	25.1336	gi|156537073|ref|XP_001602106.1|	146	1.00E-33	PREDICTED: similar to GA19929-PA [Nasonia vitripennis]	sp|Q9VVS4|MED11_DROME	135	6.00E-31	Mediator of RNA polymerase II transcription subunit 11 OS=Drosophila melanogaster GN=MED11 PE=1 SV=1
Unigene11251_JingChaoZuZhi2	561	60	14.7279	gi|52219180|ref|NP_001004671.1|	137	3.00E-31	protein UXT [Danio rerio] >gi|51858858|gb|AAH81425.1| Zgc:101894 [Danio rerio]	sp|Q9UBK9|UXT_HUMAN	127	5.00E-29	Protein UXT OS=Homo sapiens GN=UXT PE=1 SV=1
Unigene11252_JingChaoZuZhi2	335	8	3.2885	--	--	--	--	--	--	--	--
Unigene11253_JingChaoZuZhi2	269	18	9.2145	--	--	--	--	--	--	--	--
Unigene11254_JingChaoZuZhi2	489	64	18.0228	--	--	--	--	--	--	--	--
Unigene11255_JingChaoZuZhi2	493	26	7.2624	gi|296233396|ref|XP_002761996.1|	105	5.00E-22	PREDICTED: zinc finger protein 708 [Callithrix jacchus]	sp|P17019|ZN708_HUMAN	105	1.00E-22	Zinc finger protein 708 OS=Homo sapiens GN=ZNF708 PE=2 SV=4
Unigene11256_JingChaoZuZhi2	346	12	4.7759	gi|189533973|ref|XP_001922220.1|	79	3.00E-22	PREDICTED: DEAD (Asp-Glu-Ala-Asp) box polypeptide 10 [Danio rerio]	sp|Q80Y44|DDX10_MOUSE	75.5	2.00E-20	Probable ATP-dependent RNA helicase DDX10 OS=Mus musculus GN=Ddx10 PE=1 SV=2
Unigene11257_JingChaoZuZhi2	316	31	13.5091	--	--	--	--	--	--	--	--
Unigene11258_JingChaoZuZhi2	775	95	16.88	gi|119627579|gb|EAX07174.1|	48.5	7.00E-10	hCG1793893 [Homo sapiens]	sp|Q9T0K5|LRX3_ARATH	40.4	2.00E-09	Leucine-rich repeat extensin-like protein 3 OS=Arabidopsis thaliana GN=LRX3 PE=1 SV=1
Unigene11259_JingChaoZuZhi2	361	29	11.0622	--	--	--	--	--	--	--	--
Unigene1125_JingChaoZuZhi2	412	173	57.823	--	--	--	--	--	--	--	--
Unigene11260_JingChaoZuZhi2	1043	184	24.2932	gi|156550737|ref|XP_001606071.1|	250	7.00E-65	PREDICTED: similar to GM14009p [Nasonia vitripennis]	sp|Q924N5|ACBG1_RAT	238	5.00E-62	Long-chain-fatty-acid--CoA ligase ACSBG1 OS=Rattus norvegicus GN=Acsbg1 PE=1 SV=1
Unigene11261_JingChaoZuZhi2	394	18	6.2911	--	--	--	--	--	--	--	--
Unigene11262_JingChaoZuZhi2	334	8	3.2983	--	--	--	--	--	--	--	--
Unigene11263_JingChaoZuZhi2	558	28	6.91	--	--	--	--	--	--	--	--
Unigene11264_JingChaoZuZhi2	478	20	5.7617	gi|194853650|ref|XP_001968200.1|	93.6	2.00E-18	GG24735 [Drosophila erecta] >gi|190660067|gb|EDV57259.1| GG24735 [Drosophila erecta]	sp|P36044|MNN4_YEAST	68.9	1.00E-11	Protein MNN4 OS=Saccharomyces cerevisiae GN=MNN4 PE=2 SV=2
Unigene11265_JingChaoZuZhi2	350	9	3.541	--	--	--	--	--	--	--	--
Unigene11266_JingChaoZuZhi2	470	42	12.3056	gi|195575603|ref|XP_002077667.1|	67.4	2.00E-10	GD23040 [Drosophila simulans] >gi|194189676|gb|EDX03252.1| GD23040 [Drosophila simulans]	sp|P53935|NST1_YEAST	60.1	6.00E-09	Stress response protein NST1 OS=Saccharomyces cerevisiae GN=NST1 PE=1 SV=1
Unigene11267_JingChaoZuZhi2	373	50	18.4592	--	--	--	--	--	--	--	--
Unigene11268_JingChaoZuZhi2	596	56	12.9388	gi|307196045|gb|EFN77770.1|	57	4.00E-07	XK-related protein 4 [Harpegnathos saltator]	--	--	--	--
Unigene11269_JingChaoZuZhi2	829	122	20.2655	--	--	--	--	--	--	--	--
Unigene1126_JingChaoZuZhi2	301	36	16.4698	gi|195119532|ref|XP_002004285.1|	89	1.00E-22	GI19695 [Drosophila mojavensis] >gi|193909353|gb|EDW08220.1| GI19695 [Drosophila mojavensis]	sp|Q05049|MUC1_XENLA	56.2	2.00E-10	Integumentary mucin C.1 (Fragment) OS=Xenopus laevis PE=2 SV=1
Unigene11270_JingChaoZuZhi2	303	42	19.0879	gi|198413157|ref|XP_002120976.1|	73.2	3.00E-12	PREDICTED: similar to solute carrier family 34 (sodium phosphate), member 2b [Ciona intestinalis]	sp|Q80SU6|NPT2C_MOUSE	62.4	8.00E-10	Sodium-dependent phosphate transport protein 2C OS=Mus musculus GN=Slc34a3 PE=1 SV=1
Unigene11271_JingChaoZuZhi2	379	26	9.4468	--	--	--	--	--	--	--	--
Unigene11272_JingChaoZuZhi2	888	110	17.0581	gi|221126073|ref|XP_002162607.1|	55.5	3.00E-13	PREDICTED: similar to predicted protein [Hydra magnipapillata]	--	--	--	--
Unigene11273_JingChaoZuZhi2	407	31	10.4886	gi|119627579|gb|EAX07174.1|	65.5	5.00E-10	hCG1793893 [Homo sapiens]	sp|Q9S8M0|LECT_SOLTU	60.8	2.00E-09	Chitin-binding lectin 1 OS=Solanum tuberosum PE=1 SV=2
Unigene11274_JingChaoZuZhi2	979	122	17.1605	gi|307205425|gb|EFN83766.1|	96.7	5.00E-36	Phosphatidylinositol-specific phospholipase C X domain-containing protein 1 [Harpegnathos saltator]	sp|Q8BLJ3|PLCX3_MOUSE	48.5	4.00E-11	PI-PLC X domain-containing protein 3 OS=Mus musculus GN=Plcxd3 PE=2 SV=1
Unigene11275_JingChaoZuZhi2	1572	284	24.8781	--	--	--	--	--	--	--	--
Unigene11276_JingChaoZuZhi2	291	12	5.6786	--	--	--	--	--	--	--	--
Unigene11277_JingChaoZuZhi2	709	112	21.7532	--	--	--	--	--	--	--	--
Unigene11278_JingChaoZuZhi2	325	18	7.6268	gi|268531734|ref|XP_002630994.1|	56.2	3.00E-07	Hypothetical protein CBG02739 [Caenorhabditis briggsae]	sp|Q8IN81|FRU_DROME	50.1	4.00E-06	Sex determination protein fruitless OS=Drosophila melanogaster GN=fru PE=1 SV=1
Unigene11279_JingChaoZuZhi2	311	30	13.2835	--	--	--	--	--	--	--	--
Unigene1127_JingChaoZuZhi2	273	47	23.7076	--	--	--	--	--	--	--	--
Unigene11280_JingChaoZuZhi2	1002	304	41.779	gi|119627579|gb|EAX07174.1|	105	4.00E-21	hCG1793893 [Homo sapiens]	sp|Q8I1F4|FBRL_DROER	95.1	7.00E-19	rRNA 2'-O-methyltransferase fibrillarin OS=Drosophila erecta GN=Fib PE=3 SV=1
Unigene11281_JingChaoZuZhi2	504	23	6.2842	gi|195392120|ref|XP_002054707.1|	146	3.00E-34	GJ22656 [Drosophila virilis] >gi|194152793|gb|EDW68227.1| GJ22656 [Drosophila virilis]	sp|O08890|5HT1F_CAVPO	97.8	3.00E-20	5-hydroxytryptamine receptor 1F OS=Cavia porcellus GN=HTR1F PE=3 SV=1
Unigene11282_JingChaoZuZhi2	317	17	7.3848	--	--	--	--	--	--	--	--
Unigene11283_JingChaoZuZhi2	431	18	5.751	--	--	--	--	--	--	--	--
Unigene11284_JingChaoZuZhi2	290	33	15.67	--	--	--	--	--	--	--	--
Unigene11285_JingChaoZuZhi2	457	25	7.5331	gi|156542971|ref|XP_001602606.1|	129	2.00E-29	PREDICTED: similar to wd-repeat protein [Nasonia vitripennis]	sp|Q17BB0|WDR12_AEDAE	115	1.00E-25	Ribosome biogenesis protein WDR12 homolog OS=Aedes aegypti GN=AAEL005041 PE=3 SV=1
Unigene11286_JingChaoZuZhi2	1118	144	17.7367	gi|296481885|gb|DAA24000.1|	83.2	2.00E-14	zinc finger CCCH-type containing 13 [Bos taurus]	sp|Q5T200|ZC3HD_HUMAN	75.1	9.00E-13	Zinc finger CCCH domain-containing protein 13 OS=Homo sapiens GN=ZC3H13 PE=1 SV=1
Unigene11287_JingChaoZuZhi2	733	87	16.3443	gi|170577703|ref|XP_001894106.1|	74.7	3.00E-12	Hypothetical 17.1 kDa protein in PUR5 3'region [Brugia malayi]	sp|Q69566|U88_HHV6U	60.5	1.00E-08	Uncharacterized protein U88 OS=Human herpesvirus 6A (strain Uganda-1102) GN=U88 PE=4 SV=1
Unigene11288_JingChaoZuZhi2	392	33	11.5926	--	--	--	--	--	--	--	--
Unigene11289_JingChaoZuZhi2	274	37	18.5953	--	--	--	--	--	--	--	--
Unigene1128_JingChaoZuZhi2	2657	711	36.8493	gi|113681577|ref|NP_001038619.1|	628	0	probable phospholipid-transporting ATPase IIB [Danio rerio] >gi|94734353|emb|CAK04363.1| novel protein similar to vertebrate ATPase, Class II, type 9B (ATP9B) [Danio rerio]	sp|A1A4J6|ATP9B_BOVIN	618	0	Probable phospholipid-transporting ATPase IIB OS=Bos taurus GN=ATP9B PE=2 SV=1
Unigene11290_JingChaoZuZhi2	320	60	25.8198	--	--	--	--	--	--	--	--
Unigene11291_JingChaoZuZhi2	1937	312	22.1808	gi|126326978|ref|XP_001380860.1|	480	1.00E-134	PREDICTED: similar to SID1 transmembrane family, member 2, [Monodelphis domestica]	sp|Q8NBJ9|SIDT2_HUMAN	474	7.00E-133	SID1 transmembrane family member 2 OS=Homo sapiens GN=SIDT2 PE=1 SV=2
Unigene11292_JingChaoZuZhi2	763	61	11.0092	gi|307193410|gb|EFN76235.1|	62	2.00E-08	Transmembrane protein C9orf5 [Harpegnathos saltator]	--	--	--	--
Unigene11293_JingChaoZuZhi2	7168	1780	34.1959	gi|307203970|gb|EFN82877.1|	1520	0	E3 ubiquitin-protein ligase UBR5 [Harpegnathos saltator]	sp|P51592|HYD_DROME	1300	0	E3 ubiquitin-protein ligase hyd OS=Drosophila melanogaster GN=hyd PE=1 SV=3
Unigene11294_JingChaoZuZhi2	340	22	8.9104	--	--	--	--	--	--	--	--
Unigene11295_JingChaoZuZhi2	263	26	13.6135	--	--	--	--	--	--	--	--
Unigene11296_JingChaoZuZhi2	437	68	21.4279	--	--	--	--	--	--	--	--
Unigene11297_JingChaoZuZhi2	695	118	23.3802	--	--	--	--	--	--	--	--
Unigene11298_JingChaoZuZhi2	860	78	12.4896	gi|157117910|ref|XP_001653096.1|	372	1.00E-124	phosphatidylserine receptor [Aedes aegypti] >gi|157117912|ref|XP_001653097.1| phosphatidylserine receptor [Aedes aegypti] >gi|108875937|gb|EAT40162.1| phosphatidylserine receptor [Aedes aegypti] >gi|108875938|gb|EAT40163.1| phosphatidylserine receptor [Aedes aegypti]	sp|Q6PFM0|JMJD6_DANRE	358	1.00E-118	Bifunctional arginine demethylase and lysyl-hydroxylase JMJD6 OS=Danio rerio GN=jmjd6 PE=1 SV=2
Unigene11299_JingChaoZuZhi2	566	97	23.5997	--	--	--	--	--	--	--	--
Unigene1129_JingChaoZuZhi2	544	53	13.4162	--	--	--	--	--	--	--	--
Unigene112_JingChaoZuZhi2	335	41	16.8535	--	--	--	--	--	--	--	--
Unigene11300_JingChaoZuZhi2	896	61	9.3751	gi|91982997|gb|ABE68636.1|	82	3.00E-14	dachshund [Americamysis bahia]	--	--	--	--
Unigene11301_JingChaoZuZhi2	335	300	123.3185	gi|268579349|ref|XP_002644657.1|	72.4	5.00E-12	Hypothetical protein CBG14637 [Caenorhabditis briggsae]	sp|B2RY56|RBM25_MOUSE	66.2	6.00E-11	RNA-binding protein 25 OS=Mus musculus GN=Rbm25 PE=1 SV=1
Unigene11302_JingChaoZuZhi2	514	105	28.1305	gi|126338156|ref|XP_001368216.1|	54.7	1.00E-06	PREDICTED: similar to Ubiquitin specific peptidase 13 (isopeptidase T-3) [Monodelphis domestica]	--	--	--	--
Unigene11303_JingChaoZuZhi2	283	15	7.2989	gi|195454565|ref|XP_002074299.1|	73.6	9.00E-15	GK18364 [Drosophila willistoni] >gi|194170384|gb|EDW85285.1| GK18364 [Drosophila willistoni]	sp|Q9VKJ9|C2D1_DROME	70.5	3.00E-12	Coiled-coil and C2 domain-containing protein 1-like OS=Drosophila melanogaster GN=l(2)gd1 PE=2 SV=1
Unigene11304_JingChaoZuZhi2	274	17	8.5438	--	--	--	--	--	--	--	--
Unigene11305_JingChaoZuZhi2	279	16	7.8971	--	--	--	--	--	--	--	--
Unigene11306_JingChaoZuZhi2	323	26	11.0847	--	--	--	--	--	--	--	--
Unigene11307_JingChaoZuZhi2	636	54	11.692	gi|224050197|ref|XP_002197926.1|	80.9	3.00E-14	PREDICTED: similar to rCG35995 [Taeniopygia guttata]	sp|Q5TM61|PP1RA_MACMU	60.5	9.00E-09	Serine/threonine-protein phosphatase 1 regulatory subunit 10 OS=Macaca mulatta GN=PPP1R10 PE=3 SV=1
Unigene11308_JingChaoZuZhi2	356	68	26.3033	gi|115668650|ref|XP_001198937.1|	77	2.00E-21	PREDICTED: similar to endonuclease-reverse transcriptase [Strongylocentrotus purpuratus] >gi|115976177|ref|XP_001194706.1| PREDICTED: similar to endonuclease-reverse transcriptase [Strongylocentrotus purpuratus]	--	--	--	--
Unigene11309_JingChaoZuZhi2	583	108	25.5098	gi|156548300|ref|XP_001602479.1|	61.6	2.00E-08	PREDICTED: similar to Rho GTPase-activating protein 20 (Rho-type GTPase-activating protein 20) (RA and RhoGAP domain-containing protein) (RARhoGAP) [Nasonia vitripennis]	--	--	--	--
Unigene1130_JingChaoZuZhi2	231	8	4.769	--	--	--	--	--	--	--	--
Unigene11310_JingChaoZuZhi2	262	35	18.3958	gi|167523242|ref|XP_001745958.1|	60.5	2.00E-08	hypothetical protein [Monosiga brevicollis MX1] >gi|163775759|gb|EDQ89382.1| predicted protein [Monosiga brevicollis MX1]	--	--	--	--
Unigene11311_JingChaoZuZhi2	377	21	7.6706	gi|167524196|ref|XP_001746434.1|	53.5	2.00E-06	hypothetical protein [Monosiga brevicollis MX1] >gi|163775196|gb|EDQ88821.1| predicted protein [Monosiga brevicollis MX1]	--	--	--	--
Unigene11312_JingChaoZuZhi2	264	40	20.8645	gi|135757|sp|P17764.1|THIL_RAT	76.6	6.00E-27	RecName: Full=Acetyl-CoA acetyltransferase, mitochondrial; AltName: Full=Acetoacetyl-CoA thiolase; Flags: Precursor >gi|220655|dbj|BAA03016.1| mitochondrial acetoacetyl-CoA thiolase [Rattus norvegicus] >gi|149041679|gb|EDL95520.1| acetyl-coenzyme A acetyltransferase 1, isoform CRA_b [Rattus norvegicus]	sp|P17764|THIL_RAT	76.6	1.00E-27	Acetyl-CoA acetyltransferase, mitochondrial OS=Rattus norvegicus GN=Acat1 PE=1 SV=1
Unigene11313_JingChaoZuZhi2	300	46	21.1149	--	--	--	--	--	--	--	--
Unigene11314_JingChaoZuZhi2	489	23	6.477	--	--	--	--	--	--	--	--
Unigene11315_JingChaoZuZhi2	297	27	12.5187	gi|119590288|gb|EAW69882.1|	59.3	4.00E-08	hCG1641579 [Homo sapiens]	sp|P83212|HSP2_MURBR	51.2	2.00E-06	Sperm protamine P2 OS=Murex brandaris PE=1 SV=1
Unigene11316_JingChaoZuZhi2	869	194	30.7421	--	--	--	--	--	--	--	--
Unigene11317_JingChaoZuZhi2	765	97	17.4607	--	--	--	--	--	--	--	--
Unigene11318_JingChaoZuZhi2	248	29	16.1027	--	--	--	--	--	--	--	--
Unigene11319_JingChaoZuZhi2	738	138	25.7498	--	--	--	--	--	--	--	--
Unigene1131_JingChaoZuZhi2	881	167	26.1031	--	--	--	--	--	--	--	--
Unigene11320_JingChaoZuZhi2	2710	438	22.2565	gi|72547023|ref|XP_843162.1|	87	2.00E-26	proteophosphoglycan ppg4 [Leishmania major strain Friedlin] >gi|70905641|gb|AAZ14280.1| proteophosphoglycan ppg4 [Leishmania major strain Friedlin]	sp|Q02817|MUC2_HUMAN	119	1.00E-25	Mucin-2 OS=Homo sapiens GN=MUC2 PE=1 SV=2
Unigene11321_JingChaoZuZhi2	580	47	11.1589	--	--	--	--	--	--	--	--
Unigene11322_JingChaoZuZhi2	264	44	22.9509	gi|291225984|ref|XP_002732987.1|	58.2	9.00E-08	PREDICTED: Rough Deal homolog, centromere/kinetochore protein-like [Saccoglossus kowalevskii]	--	--	--	--
Unigene11323_JingChaoZuZhi2	439	23	7.2146	--	--	--	--	--	--	--	--
Unigene11324_JingChaoZuZhi2	306	12	5.4002	--	--	--	--	--	--	--	--
Unigene11325_JingChaoZuZhi2	414	60	19.9573	--	--	--	--	--	--	--	--
Unigene11326_JingChaoZuZhi2	1004	74	10.1496	--	--	--	--	--	--	--	--
Unigene11327_JingChaoZuZhi2	509	21	5.6814	--	--	--	--	--	--	--	--
Unigene11328_JingChaoZuZhi2	556	37	9.1639	--	--	--	--	--	--	--	--
Unigene11329_JingChaoZuZhi2	1447	288	27.4079	gi|291229676|ref|XP_002734798.1|	122	2.00E-37	PREDICTED: latrophilin 3-like [Saccoglossus kowalevskii]	sp|B7ZCC9|GP112_MOUSE	112	8.00E-29	Probable G-protein coupled receptor 112 OS=Mus musculus GN=Gpr112 PE=3 SV=1
Unigene1132_JingChaoZuZhi2	632	197	42.9241	--	--	--	--	--	--	--	--
Unigene11330_JingChaoZuZhi2	547	35	8.8111	--	--	--	--	--	--	--	--
Unigene11331_JingChaoZuZhi2	749	221	40.6314	--	--	--	--	--	--	--	--
Unigene11332_JingChaoZuZhi2	422	30	9.7895	--	--	--	--	--	--	--	--
Unigene11333_JingChaoZuZhi2	420	27	8.8525	gi|149640138|ref|XP_001505432.1|	203	2.00E-51	PREDICTED: similar to copine VIII [Ornithorhynchus anatinus]	sp|Q9DC53|CPNE8_MOUSE	201	2.00E-51	Copine-8 OS=Mus musculus GN=Cpne8 PE=2 SV=2
Unigene11334_JingChaoZuZhi2	309	38	16.9347	--	--	--	--	--	--	--	--
Unigene11335_JingChaoZuZhi2	376	48	17.5794	--	--	--	--	--	--	--	--
Unigene11336_JingChaoZuZhi2	255	12	6.4803	--	--	--	--	--	--	--	--
Unigene11337_JingChaoZuZhi2	300	8	3.6722	--	--	--	--	--	--	--	--
Unigene11338_JingChaoZuZhi2	295	14	6.5352	gi|268573194|ref|XP_002641574.1|	60.8	1.00E-08	Hypothetical protein CBG09875 [Caenorhabditis briggsae]	sp|Q9Z0G8|WIPF3_RAT	57	4.00E-08	WAS/WASL-interacting protein family member 3 OS=Rattus norvegicus GN=Wipf3 PE=1 SV=1
Unigene11339_JingChaoZuZhi2	310	18	7.9958	--	--	--	--	--	--	--	--
Unigene1133_JingChaoZuZhi2	240	32	18.3608	--	--	--	--	--	--	--	--
Unigene11340_JingChaoZuZhi2	294	66	30.9135	--	--	--	--	--	--	--	--
Unigene11341_JingChaoZuZhi2	350	22	8.6558	--	--	--	--	--	--	--	--
Unigene11342_JingChaoZuZhi2	560	30	7.3771	gi|307213548|gb|EFN88957.1|	117	2.00E-37	Translational activator GCN1 [Harpegnathos saltator]	sp|Q92616|GCN1L_HUMAN	106	6.00E-27	Translational activator GCN1 OS=Homo sapiens GN=GCN1L1 PE=1 SV=6
Unigene11343_JingChaoZuZhi2	352	25	9.7802	gi|292620185|ref|XP_002664223.1|	54.7	1.00E-06	PREDICTED: RETRotransposon-like family member (retr-1)-like [Danio rerio]	--	--	--	--
Unigene11344_JingChaoZuZhi2	356	12	4.6418	gi|167526072|ref|XP_001747370.1|	52.4	5.00E-06	hypothetical protein [Monosiga brevicollis MX1] >gi|163774205|gb|EDQ87837.1| predicted protein [Monosiga brevicollis MX1]	sp|Q4PBP6|NST1_USTMA	48.9	1.00E-05	Stress response protein NST1 OS=Ustilago maydis GN=NST1 PE=3 SV=1
Unigene11345_JingChaoZuZhi2	281	27	13.2315	--	--	--	--	--	--	--	--
Unigene11346_JingChaoZuZhi2	279	9	4.4421	--	--	--	--	--	--	--	--
Unigene11347_JingChaoZuZhi2	624	77	16.9925	--	--	--	--	--	--	--	--
Unigene11348_JingChaoZuZhi2	544	98	24.8073	--	--	--	--	--	--	--	--
Unigene11349_JingChaoZuZhi2	2172	607	38.484	gi|147900889|ref|NP_001087393.1|	858	0	leucyl-tRNA synthetase [Xenopus laevis] >gi|50925135|gb|AAH79713.1| MGC82093 protein [Xenopus laevis]	sp|Q8BMJ2|SYLC_MOUSE	846	0	Leucyl-tRNA synthetase, cytoplasmic OS=Mus musculus GN=Lars PE=2 SV=2
Unigene1134_JingChaoZuZhi2	866	171	27.1913	gi|291224085|ref|XP_002732037.1|	93.6	8.00E-18	PREDICTED: HIRA interacting protein 3-like [Saccoglossus kowalevskii]	sp|Q9U7E0|ATRX_CAEEL	86.3	3.00E-16	Transcriptional regulator ATRX homolog OS=Caenorhabditis elegans GN=xnp-1 PE=1 SV=1
Unigene11350_JingChaoZuZhi2	326	13	5.4913	--	--	--	--	--	--	--	--
Unigene11351_JingChaoZuZhi2	532	29	7.5065	gi|113102|sp|P05376.1|ACHG_XENLA	46.6	6.00E-11	RecName: Full=Acetylcholine receptor subunit gamma; Flags: Precursor	sp|P05376|ACHG_XENLA	46.6	1.00E-11	Acetylcholine receptor subunit gamma OS=Xenopus laevis GN=chrng PE=2 SV=1
Unigene11352_JingChaoZuZhi2	384	39	13.9857	--	--	--	--	--	--	--	--
Unigene11353_JingChaoZuZhi2	275	15	7.5112	--	--	--	--	--	--	--	--
Unigene11354_JingChaoZuZhi2	279	17	8.3907	--	--	--	--	--	--	--	--
Unigene11355_JingChaoZuZhi2	295	3	1.4004	--	--	--	--	--	--	--	--
Unigene11356_JingChaoZuZhi2	477	25	7.2173	--	--	--	--	--	--	--	--
Unigene11357_JingChaoZuZhi2	523	36	9.4788	--	--	--	--	--	--	--	--
Unigene11358_JingChaoZuZhi2	332	17	7.0512	--	--	--	--	--	--	--	--
Unigene11359_JingChaoZuZhi2	312	9	3.9723	--	--	--	--	--	--	--	--
Unigene1135_JingChaoZuZhi2	2434	869	49.1644	gi|148238275|ref|NP_001082994.1|	903	0	insulin-degrading enzyme [Danio rerio] >gi|141796249|gb|AAI39608.1| Zgc:162603 protein [Danio rerio]	sp|Q24K02|IDE_BOVIN	897	0	Insulin-degrading enzyme OS=Bos taurus GN=IDE PE=2 SV=1
Unigene11360_JingChaoZuZhi2	282	8	3.9065	--	--	--	--	--	--	--	--
Unigene11361_JingChaoZuZhi2	313	16	7.0393	gi|156538507|ref|XP_001607093.1|	47.8	3.00E-07	PREDICTED: similar to microsomal dipeptidase [Nasonia vitripennis]	--	--	--	--
Unigene11362_JingChaoZuZhi2	253	5	2.7215	--	--	--	--	--	--	--	--
Unigene11363_JingChaoZuZhi2	503	26	7.118	gi|110749875|ref|XP_395863.3|	108	8.00E-23	PREDICTED: similar to CG31132-PA [Apis mellifera]	sp|Q9NSI6|BRWD1_HUMAN	105	1.00E-22	Bromodomain and WD repeat-containing protein 1 OS=Homo sapiens GN=BRWD1 PE=1 SV=4
Unigene11364_JingChaoZuZhi2	265	20	10.3929	--	--	--	--	--	--	--	--
Unigene11365_JingChaoZuZhi2	254	8	4.3372	--	--	--	--	--	--	--	--
Unigene11366_JingChaoZuZhi2	866	87	13.8342	gi|189529666|ref|XP_001922354.1|	61.2	5.00E-08	PREDICTED: nucleolar protein 1, 120kDa [Danio rerio]	sp|P46087|NOP2_HUMAN	51.6	7.00E-06	Putative ribosomal RNA methyltransferase NOP2 OS=Homo sapiens GN=NOP2 PE=1 SV=2
Unigene11367_JingChaoZuZhi2	313	7	3.0797	--	--	--	--	--	--	--	--
Unigene11368_JingChaoZuZhi2	258	13	6.9387	gi|293356515|ref|XP_002728926.1|	57	2.00E-07	PREDICTED: hypothetical protein, partial [Rattus norvegicus]	--	--	--	--
Unigene11369_JingChaoZuZhi2	530	87	22.6045	gi|34099638|gb|AAQ57129.1|	75.1	1.00E-12	endonuclease and reverse transcriptase-like protein [Bombyx mori]	sp|P21328|RTJK_DROME	52	7.00E-07	RNA-directed DNA polymerase from mobile element jockey OS=Drosophila melanogaster GN=pol PE=1 SV=1
Unigene1136_JingChaoZuZhi2	223	21	12.9678	gi|54038076|gb|AAH84352.1|	57	2.00E-07	LOC495149 protein [Xenopus laevis]	sp|Q5T200|ZC3HD_HUMAN	53.1	5.00E-07	Zinc finger CCCH domain-containing protein 13 OS=Homo sapiens GN=ZC3H13 PE=1 SV=1
Unigene11370_JingChaoZuZhi2	1114	204	25.2172	gi|24580684|ref|NP_608540.1|	165	3.00E-39	CG2839 [Drosophila melanogaster] >gi|22945532|gb|AAF51469.2| CG2839 [Drosophila melanogaster]	sp|Q07283|TRHY_HUMAN	120	1.00E-26	Trichohyalin OS=Homo sapiens GN=TCHH PE=1 SV=2
Unigene11371_JingChaoZuZhi2	269	3	1.5358	gi|189239517|ref|XP_975559.2|	80.5	2.00E-14	PREDICTED: similar to CG34113 CG34113-PP [Tribolium castaneum]	sp|A7LCJ3|SN_PIG	51.2	2.00E-06	Sialoadhesin OS=Sus scrofa GN=SIGLEC1 PE=1 SV=1
Unigene11372_JingChaoZuZhi2	1241	233	25.8545	gi|53850628|ref|NP_001005550.1|	318	1.00E-129	NADH-ubiquinone oxidoreductase 75 kDa subunit, mitochondrial precursor [Rattus norvegicus] >gi|81884209|sp|Q66HF1.1|NDUS1_RAT RecName: Full=NADH-ubiquinone oxidoreductase 75 kDa subunit, mitochondrial; Flags: Precursor >gi|51858651|gb|AAH81892.1| NADH dehydrogenase (ubiquinone) Fe-S protein 1 [Rattus norvegicus] >gi|149046007|gb|EDL98900.1| NADH dehydrogenase (ubiquinone) Fe-S protein 1, isoform …	sp|Q66HF1|NDUS1_RAT	318	7.00E-130	NADH-ubiquinone oxidoreductase 75 kDa subunit, mitochondrial OS=Rattus norvegicus GN=Ndufs1 PE=1 SV=1
Unigene11373_JingChaoZuZhi2	2189	666	41.8967	gi|307169908|gb|EFN62417.1|	528	1.00E-148	ATP-dependent RNA helicase DHX8 [Camponotus floridanus]	sp|A2A4P0|DHX8_MOUSE	516	3.00E-145	ATP-dependent RNA helicase DHX8 OS=Mus musculus GN=Dhx8 PE=2 SV=1
Unigene11374_JingChaoZuZhi2	271	14	7.1139	--	--	--	--	--	--	--	--
Unigene11375_JingChaoZuZhi2	286	22	10.5927	--	--	--	--	--	--	--	--
Unigene11376_JingChaoZuZhi2	521	26	6.8721	--	--	--	--	--	--	--	--
Unigene11377_JingChaoZuZhi2	335	14	5.7549	--	--	--	--	--	--	--	--
Unigene11378_JingChaoZuZhi2	440	67	20.9688	gi|195449703|ref|XP_002072187.1|	61.6	8.00E-09	GK22713 [Drosophila willistoni] >gi|194168272|gb|EDW83173.1| GK22713 [Drosophila willistoni]	sp|Q9Y606|TRUA_HUMAN	54.7	2.00E-07	tRNA pseudouridine synthase A, mitochondrial OS=Homo sapiens GN=PUS1 PE=1 SV=3
Unigene11379_JingChaoZuZhi2	425	26	8.4243	gi|149722735|ref|XP_001495592.1|	77	2.00E-13	PREDICTED: similar to Zinc finger protein 324A (Zinc finger protein ZF5128) [Equus caballus]	sp|P17036|ZNF3_HUMAN	74.7	2.00E-13	Zinc finger protein 3 OS=Homo sapiens GN=ZNF3 PE=1 SV=3
Unigene1137_JingChaoZuZhi2	1052	253	33.1174	--	--	--	--	--	--	--	--
Unigene11380_JingChaoZuZhi2	430	118	37.789	--	--	--	--	--	--	--	--
Unigene11381_JingChaoZuZhi2	1375	162	16.2242	gi|112983652|ref|NP_001036870.1|	439	1.00E-121	receptor type guanylyl cyclase [Bombyx mori] >gi|12964646|dbj|BAB32672.1| receptor type guanylyl cyclase [Bombyx mori]	sp|P16066|ANPRA_HUMAN	335	5.00E-91	Atrial natriuretic peptide receptor 1 OS=Homo sapiens GN=NPR1 PE=1 SV=1
Unigene11382_JingChaoZuZhi2	324	17	7.2253	--	--	--	--	--	--	--	--
Unigene11383_JingChaoZuZhi2	292	14	6.6023	--	--	--	--	--	--	--	--
Unigene11384_JingChaoZuZhi2	619	58	12.903	--	--	--	--	--	--	--	--
Unigene11385_JingChaoZuZhi2	299	24	11.0533	--	--	--	--	--	--	--	--
Unigene11386_JingChaoZuZhi2	268	8	4.1106	--	--	--	--	--	--	--	--
Unigene11387_JingChaoZuZhi2	299	45	20.7249	--	--	--	--	--	--	--	--
Unigene11388_JingChaoZuZhi2	280	15	7.3771	--	--	--	--	--	--	--	--
Unigene11389_JingChaoZuZhi2	1287	85	9.0948	gi|156545501|ref|XP_001607052.1|	248	1.00E-120	PREDICTED: similar to cleavage and polyadenylation specificity factor cpsf [Nasonia vitripennis]	sp|Q9N4C2|CPSF1_CAEEL	150	8.00E-64	Probable cleavage and polyadenylation specificity factor subunit 1 OS=Caenorhabditis elegans GN=cpsf-1 PE=2 SV=2
Unigene1138_JingChaoZuZhi2	265	16	8.3143	--	--	--	--	--	--	--	--
Unigene11390_JingChaoZuZhi2	295	13	6.0684	gi|158296934|ref|XP_317268.4|	195	5.00E-49	AGAP008200-PA [Anopheles gambiae str. PEST] >gi|157014951|gb|EAA12472.5| AGAP008200-PA [Anopheles gambiae str. PEST]	sp|P17972|KCNAW_DROME	193	3.00E-49	Potassium voltage-gated channel protein Shaw OS=Drosophila melanogaster GN=Shaw PE=2 SV=1
Unigene11391_JingChaoZuZhi2	781	174	30.6796	--	--	--	--	--	--	--	--
Unigene11392_JingChaoZuZhi2	278	10	4.9534	--	--	--	--	--	--	--	--
Unigene11393_JingChaoZuZhi2	343	24	9.6354	gi|115841647|ref|XP_783989.2|	81.6	7.00E-15	PREDICTED: similar to Rad50-interacting protein 1 [Strongylocentrotus purpuratus] >gi|115949569|ref|XP_001179475.1| PREDICTED: similar to Rad50-interacting protein 1 [Strongylocentrotus purpuratus]	sp|Q8BZ36|RINT1_MOUSE	78.6	1.00E-14	RAD50-interacting protein 1 OS=Mus musculus GN=Rint1 PE=2 SV=2
Unigene11394_JingChaoZuZhi2	446	60	18.5254	gi|115931431|ref|XP_001185218.1|	65.1	7.00E-10	PREDICTED: similar to Syne-1B [Strongylocentrotus purpuratus]	sp|Q9EPQ2|RPGR1_MOUSE	62.4	1.00E-09	X-linked retinitis pigmentosa GTPase regulator-interacting protein 1 OS=Mus musculus GN=Rpgrip1 PE=1 SV=1
Unigene11395_JingChaoZuZhi2	427	55	17.7373	--	--	--	--	--	--	--	--
Unigene11396_JingChaoZuZhi2	366	85	31.9808	gi|195398121|ref|XP_002057673.1|	99.8	3.00E-20	GJ18260 [Drosophila virilis] >gi|194141327|gb|EDW57746.1| GJ18260 [Drosophila virilis]	sp|Q14554|PDIA5_HUMAN	80.1	4.00E-15	Protein disulfide-isomerase A5 OS=Homo sapiens GN=PDIA5 PE=1 SV=1
Unigene11397_JingChaoZuZhi2	356	38	14.6989	--	--	--	--	--	--	--	--
Unigene11398_JingChaoZuZhi2	1163	277	32.7983	gi|195340781|ref|XP_002036991.1|	135	3.00E-30	GM12357 [Drosophila sechellia] >gi|195565095|ref|XP_002106141.1| GD16700 [Drosophila simulans] >gi|194131107|gb|EDW53150.1| GM12357 [Drosophila sechellia] >gi|194203513|gb|EDX17089.1| GD16700 [Drosophila simulans]	sp|Q58DV5|RM30_BOVIN	71.6	1.00E-11	39S ribosomal protein L30, mitochondrial OS=Bos taurus GN=MRPL30 PE=1 SV=1
Unigene11399_JingChaoZuZhi2	395	29	10.11	--	--	--	--	--	--	--	--
Unigene1139_JingChaoZuZhi2	236	753	439.3744	--	--	--	--	--	--	--	--
Unigene113_JingChaoZuZhi2	334	79	32.5711	--	--	--	--	--	--	--	--
Unigene11400_JingChaoZuZhi2	312	28	12.3582	--	--	--	--	--	--	--	--
Unigene11401_JingChaoZuZhi2	996	72	9.9546	gi|289743413|gb|ADD20454.1|	255	2.00E-66	FAD oxidoreductase [Glossina morsitans morsitans]	sp|Q4R510|FXRD1_MACFA	207	9.00E-53	FAD-dependent oxidoreductase domain-containing protein 1 OS=Macaca fascicularis GN=FOXRED1 PE=2 SV=1
Unigene11402_JingChaoZuZhi2	305	23	10.3844	gi|260832311|ref|XP_002611101.1|	64.7	9.00E-10	hypothetical protein BRAFLDRAFT_206058 [Branchiostoma floridae] >gi|229296471|gb|EEN67111.1| hypothetical protein BRAFLDRAFT_206058 [Branchiostoma floridae]	--	--	--	--
Unigene11403_JingChaoZuZhi2	360	2	0.765	gi|292619957|ref|XP_001344438.3|	56.2	3.00E-07	PREDICTED: hypothetical protein [Danio rerio]	--	--	--	--
Unigene11404_JingChaoZuZhi2	432	23	7.3316	--	--	--	--	--	--	--	--
Unigene11405_JingChaoZuZhi2	494	17	4.7389	--	--	--	--	--	--	--	--
Unigene11406_JingChaoZuZhi2	1479	387	36.0325	--	--	--	--	--	--	--	--
Unigene11407_JingChaoZuZhi2	428	18	5.7914	--	--	--	--	--	--	--	--
Unigene11408_JingChaoZuZhi2	1275	157	16.9567	gi|66363186|ref|XP_628559.1|	73.2	3.00E-28	cryptopsoridial mucin, large thr stretch, signal peptide sequence [Cryptosporidium parvum Iowa II] >gi|46229571|gb|EAK90389.1| cryptopsoridial mucin, large thr stretch, signal peptide sequence [Cryptosporidium parvum Iowa II]	sp|Q54TK8|GEFP_DICDI	106	3.00E-22	Ras guanine nucleotide exchange factor P OS=Dictyostelium discoideum GN=gefP PE=2 SV=1
Unigene11409_JingChaoZuZhi2	716	57	10.9626	--	--	--	--	--	--	--	--
Unigene1140_JingChaoZuZhi2	254	28	15.1802	--	--	--	--	--	--	--	--
Unigene11410_JingChaoZuZhi2	425	19	6.1563	--	--	--	--	--	--	--	--
Unigene11411_JingChaoZuZhi2	328	10	4.1983	--	--	--	--	--	--	--	--
Unigene11412_JingChaoZuZhi2	1930	320	22.832	gi|225713642|gb|ACO12667.1|	79	6.00E-13	Carbohydrate sulfotransferase 1 [Lepeophtheirus salmonis]	sp|Q9QUP4|CHST5_MOUSE	68.9	1.00E-10	Carbohydrate sulfotransferase 5 OS=Mus musculus GN=Chst5 PE=2 SV=1
Unigene11413_JingChaoZuZhi2	693	90	17.8839	--	--	--	--	--	--	--	--
Unigene11414_JingChaoZuZhi2	560	83	20.4099	gi|237838763|ref|XP_002368679.1|	53.9	3.00E-06	voltage gated chloride channel domain-containing protein [Toxoplasma gondii ME49] >gi|211966343|gb|EEB01539.1| voltage gated chloride channel domain-containing protein [Toxoplasma gondii ME49]	--	--	--	--
Unigene11415_JingChaoZuZhi2	1069	150	19.3226	gi|149632747|ref|XP_001509993.1|	249	1.00E-64	PREDICTED: similar to Nucleoporin 160kDa [Ornithorhynchus anatinus]	sp|Q9Z0W3|NU160_MOUSE	247	1.00E-64	Nuclear pore complex protein Nup160 OS=Mus musculus GN=Nup160 PE=1 SV=2
Unigene11416_JingChaoZuZhi2	271	10	5.0814	--	--	--	--	--	--	--	--
Unigene11417_JingChaoZuZhi2	427	34	10.9649	gi|307189043|gb|EFN73542.1|	184	8.00E-46	Integrator complex subunit 9 [Camponotus floridanus]	sp|Q8K114|INT9_MOUSE	162	6.00E-40	Integrator complex subunit 9 OS=Mus musculus GN=Ints9 PE=2 SV=1
Unigene11418_JingChaoZuZhi2	588	17	3.9813	gi|68448493|ref|NP_001020337.1|	52.4	1.00E-05	RNA-binding motif protein, X-linked 2 [Danio rerio] >gi|67678309|gb|AAH96985.1| RNA binding motif protein, X-linked 2 [Danio rerio]	--	--	--	--
Unigene11419_JingChaoZuZhi2	611	41	9.2405	gi|157120758|ref|XP_001659758.1|	194	3.00E-63	ATP-dependent RNA helicase [Aedes aegypti] >gi|108883047|gb|EAT47272.1| ATP-dependent RNA helicase [Aedes aegypti]	sp|P34498|MOG1_CAEEL	171	8.00E-53	Probable pre-mRNA-splicing factor ATP-dependent RNA helicase mog-1 OS=Caenorhabditis elegans GN=mog-1 PE=2 SV=2
Unigene1141_JingChaoZuZhi2	275	27	13.5202	--	--	--	--	--	--	--	--
Unigene11420_JingChaoZuZhi2	660	63	13.1446	gi|300117074|ref|NP_001177865.1|	128	2.00E-28	apolipoprotein O-like [Nasonia vitripennis]	sp|Q5NVS6|APOOL_PONAB	59.3	2.00E-08	Apolipoprotein O-like OS=Pongo abelii GN=APOOL PE=2 SV=1
Unigene11421_JingChaoZuZhi2	292	33	15.5626	--	--	--	--	--	--	--	--
Unigene11422_JingChaoZuZhi2	276	8	3.9915	gi|237838763|ref|XP_002368679.1|	60.1	2.00E-08	voltage gated chloride channel domain-containing protein [Toxoplasma gondii ME49] >gi|211966343|gb|EEB01539.1| voltage gated chloride channel domain-containing protein [Toxoplasma gondii ME49]	sp|Q9FPQ6|GP1_CHLRE	49.3	7.00E-06	Vegetative cell wall protein gp1 OS=Chlamydomonas reinhardtii GN=GP1 PE=2 SV=1
Unigene11423_JingChaoZuZhi2	270	21	10.7104	--	--	--	--	--	--	--	--
Unigene11424_JingChaoZuZhi2	300	17	7.8033	--	--	--	--	--	--	--	--
Unigene11425_JingChaoZuZhi2	280	11	5.4099	--	--	--	--	--	--	--	--
Unigene11426_JingChaoZuZhi2	347	20	7.9369	--	--	--	--	--	--	--	--
Unigene11427_JingChaoZuZhi2	1064	216	27.9553	--	--	--	--	--	--	--	--
Unigene11428_JingChaoZuZhi2	278	30	14.8603	--	--	--	--	--	--	--	--
Unigene11429_JingChaoZuZhi2	711	131	25.3719	gi|195130927|ref|XP_002009902.1|	60.5	5.00E-09	GI15619 [Drosophila mojavensis] >gi|193908352|gb|EDW07219.1| GI15619 [Drosophila mojavensis]	--	--	--	--
Unigene1142_JingChaoZuZhi2	376	67	24.538	--	--	--	--	--	--	--	--
Unigene11430_JingChaoZuZhi2	342	11	4.4291	--	--	--	--	--	--	--	--
Unigene11431_JingChaoZuZhi2	1394	398	39.3162	gi|110766155|ref|XP_395739.3|	307	1.00E-106	PREDICTED: similar to tuberous sclerosis 2 isoform 3 [Apis mellifera]	sp|Q61037|TSC2_MOUSE	198	7.00E-50	Tuberin OS=Mus musculus GN=Tsc2 PE=1 SV=1
Unigene11432_JingChaoZuZhi2	671	74	15.1866	gi|119627579|gb|EAX07174.1|	59.7	8.00E-08	hCG1793893 [Homo sapiens]	sp|Q9SX31|PERK9_ARATH	59.3	2.00E-08	Proline-rich receptor-like protein kinase PERK9 OS=Arabidopsis thaliana GN=PERK9 PE=2 SV=1
Unigene11433_JingChaoZuZhi2	782	79	13.9114	gi|159570532|emb|CAP19396.1|	245	1.00E-63	aminomethyltransferase [Danio rerio] >gi|159570761|emb|CAP19587.1| aminomethyltransferase [Danio rerio]	sp|Q8CFA2|GCST_MOUSE	229	1.00E-59	Aminomethyltransferase, mitochondrial OS=Mus musculus GN=Amt PE=2 SV=1
Unigene11434_JingChaoZuZhi2	456	61	18.4212	--	--	--	--	--	--	--	--
Unigene11435_JingChaoZuZhi2	270	6	3.0601	--	--	--	--	--	--	--	--
Unigene11436_JingChaoZuZhi2	267	17	8.7678	--	--	--	--	--	--	--	--
Unigene11437_JingChaoZuZhi2	410	83	27.877	--	--	--	--	--	--	--	--
Unigene11438_JingChaoZuZhi2	422	31	10.1158	--	--	--	--	--	--	--	--
Unigene11439_JingChaoZuZhi2	292	49	23.1081	gi|1150834|gb|AAA85515.1|	50.4	9.00E-11	Wiscott-Aldrich Syndrome protein homolog [Mus musculus]	sp|Q9Z0G8|WIPF3_RAT	63.9	3.00E-10	WAS/WASL-interacting protein family member 3 OS=Rattus norvegicus GN=Wipf3 PE=1 SV=1
Unigene1143_JingChaoZuZhi2	280	33	16.2296	gi|183396273|gb|ACC62007.1|	63.2	3.00E-09	hydroxyproline-rich glycoprotein [Cryptosporidium hominis]	sp|Q5T200|ZC3HD_HUMAN	55.8	8.00E-08	Zinc finger CCCH domain-containing protein 13 OS=Homo sapiens GN=ZC3H13 PE=1 SV=1
Unigene11440_JingChaoZuZhi2	351	13	5.1002	gi|293347684|ref|XP_002726645.1|	52.4	5.00E-06	PREDICTED: hypothetical protein [Rattus norvegicus]	--	--	--	--
Unigene11441_JingChaoZuZhi2	345	28	11.1761	--	--	--	--	--	--	--	--
Unigene11442_JingChaoZuZhi2	332	19	7.8807	gi|149454157|ref|XP_001519720.1|	52.8	4.00E-06	PREDICTED: similar to FAT tumor suppressor homolog 1, partial [Ornithorhynchus anatinus]	sp|Q14517|FAT1_HUMAN	50.4	3.00E-06	Protocadherin Fat 1 OS=Homo sapiens GN=FAT1 PE=1 SV=1
Unigene11443_JingChaoZuZhi2	1246	213	23.5404	--	--	--	--	--	--	--	--
Unigene11444_JingChaoZuZhi2	326	22	9.293	--	--	--	--	--	--	--	--
Unigene11445_JingChaoZuZhi2	315	18	7.8689	gi|189241708|ref|XP_967454.2|	60.5	2.00E-08	PREDICTED: similar to ribonuclease iii [Tribolium castaneum]	--	--	--	--
Unigene11446_JingChaoZuZhi2	350	33	12.9837	gi|1771447|emb|CAA67357.1|	128	5.00E-29	integrin [Pacifastacus leniusculus]	sp|P12606|ITB1A_XENLA	103	3.00E-22	Integrin beta-1-A OS=Xenopus laevis GN=itgb1-a PE=2 SV=1
Unigene11447_JingChaoZuZhi2	311	18	7.9701	--	--	--	--	--	--	--	--
Unigene11448_JingChaoZuZhi2	662	91	18.9293	--	--	--	--	--	--	--	--
Unigene11449_JingChaoZuZhi2	639	51	10.9906	--	--	--	--	--	--	--	--
Unigene1144_JingChaoZuZhi2	207	36	23.9488	--	--	--	--	--	--	--	--
Unigene11450_JingChaoZuZhi2	268	6	3.083	--	--	--	--	--	--	--	--
Unigene11451_JingChaoZuZhi2	808	54	9.2031	gi|189241922|ref|XP_967546.2|	157	4.00E-37	PREDICTED: similar to rCG52383 [Tribolium castaneum]	sp|Q8NBF6|AVL9_HUMAN	120	8.00E-27	Late secretory pathway protein AVL9 homolog OS=Homo sapiens GN=AVL9 PE=1 SV=1
Unigene11452_JingChaoZuZhi2	424	32	10.3929	--	--	--	--	--	--	--	--
Unigene11453_JingChaoZuZhi2	284	23	11.1522	gi|32997031|gb|AAP45327.1|	48.1	5.00E-08	RJL [Trypanosoma cruzi]	sp|Q5RDE5|DJC27_PONAB	56.6	5.00E-08	DnaJ homolog subfamily C member 27 OS=Pongo abelii GN=DNAJC27 PE=2 SV=1
Unigene11454_JingChaoZuZhi2	1192	199	22.9895	gi|124505879|ref|XP_001351053.1|	50.1	3.00E-12	glutamic acid-rich protein (garp) [Plasmodium falciparum 3D7] >gi|6594249|emb|CAB63561.1| glutamic acid-rich protein (garp) [Plasmodium falciparum 3D7]	sp|P13816|GARP_PLAFF	49.7	8.00E-13	Glutamic acid-rich protein OS=Plasmodium falciparum (isolate FC27 / Papua New Guinea) GN=GARP PE=4 SV=1
Unigene11455_JingChaoZuZhi2	589	79	18.4699	gi|85857834|gb|ABC86451.1|	62	1.00E-08	IP05464p [Drosophila melanogaster]	sp|P04929|HRPX_PLALO	56.6	1.00E-07	Histidine-rich glycoprotein OS=Plasmodium lophurae PE=4 SV=1
Unigene11456_JingChaoZuZhi2	1159	403	47.8821	gi|156543298|ref|XP_001601952.1|	390	1.00E-107	PREDICTED: similar to GA10597-PA [Nasonia vitripennis]	sp|Q9CY27|TECR_MOUSE	323	1.00E-87	Trans-2,3-enoyl-CoA reductase OS=Mus musculus GN=Tecr PE=1 SV=1
Unigene11457_JingChaoZuZhi2	351	72	28.2473	gi|221123198|ref|XP_002166460.1|	83.6	2.00E-15	PREDICTED: similar to Uncharacterized protein ZK1236.4 [Hydra magnipapillata]	--	--	--	--
Unigene11458_JingChaoZuZhi2	325	13	5.5082	--	--	--	--	--	--	--	--
Unigene11459_JingChaoZuZhi2	504	131	35.7925	--	--	--	--	--	--	--	--
Unigene1145_JingChaoZuZhi2	416	125	41.3779	--	--	--	--	--	--	--	--
Unigene11460_JingChaoZuZhi2	1270	176	19.0836	gi|126304743|ref|XP_001366306.1|	125	4.00E-53	PREDICTED: similar to conserved nuclear protein NHN1, isoform 1 [Monodelphis domestica]	sp|Q86VM9|ZCH18_HUMAN	115	4.00E-51	Zinc finger CCCH domain-containing protein 18 OS=Homo sapiens GN=ZC3H18 PE=1 SV=2
Unigene11461_JingChaoZuZhi2	429	26	8.3458	gi|194892552|ref|XP_001977684.1|	57	2.00E-07	GG18108 [Drosophila erecta] >gi|190649333|gb|EDV46611.1| GG18108 [Drosophila erecta]	sp|Q9S8M0|LECT_SOLTU	49.7	6.00E-06	Chitin-binding lectin 1 OS=Solanum tuberosum PE=1 SV=2
Unigene11462_JingChaoZuZhi2	288	11	5.2596	gi|291190064|ref|NP_001167172.1|	64.7	5.00E-22	N-acetylglucosamine-6-sulfatase [Salmo salar] >gi|223648450|gb|ACN10983.1| N-acetylglucosamine-6-sulfatase precursor [Salmo salar]	sp|Q8BFR4|GNS_MOUSE	65.9	3.00E-22	N-acetylglucosamine-6-sulfatase OS=Mus musculus GN=Gns PE=2 SV=1
Unigene11463_JingChaoZuZhi2	1116	343	42.3235	--	--	--	--	--	--	--	--
Unigene11464_JingChaoZuZhi2	380	20	7.2477	gi|91090548|ref|XP_971239.1|	104	8.00E-22	PREDICTED: similar to Hemolectin CG7002-PA [Tribolium castaneum]	sp|P98092|HMCT_BOMMO	92.8	6.00E-19	Hemocytin OS=Bombyx mori PE=2 SV=1
Unigene11465_JingChaoZuZhi2	464	67	19.8842	gi|260804793|ref|XP_002597272.1|	97.4	1.00E-19	hypothetical protein BRAFLDRAFT_118155 [Branchiostoma floridae] >gi|229282535|gb|EEN53284.1| hypothetical protein BRAFLDRAFT_118155 [Branchiostoma floridae]	--	--	--	--
Unigene11466_JingChaoZuZhi2	970	155	22.0045	gi|198285569|gb|ACH85323.1|	513	1.00E-144	branched chain ketoacid dehydrogenase E1 beta polypeptide [Salmo salar]	sp|P21839|ODBB_BOVIN	503	1.00E-141	2-oxoisovalerate dehydrogenase subunit beta, mitochondrial OS=Bos taurus GN=BCKDHB PE=1 SV=2
Unigene11467_JingChaoZuZhi2	336	28	11.4755	--	--	--	--	--	--	--	--
Unigene11468_JingChaoZuZhi2	684	96	19.3271	gi|66821251|ref|XP_644124.1|	73.2	7.00E-12	DNA ligase I [Dictyostelium discoideum AX4] >gi|74926714|sp|Q869E1.1|DNL1_DICDI RecName: Full=DNA ligase 1; AltName: Full=DNA ligase I; AltName: Full=Polydeoxyribonucleotide synthase [ATP] 1 >gi|60472186|gb|EAL70139.1| DNA ligase I [Dictyostelium discoideum AX4]	sp|Q869E1|DNLI1_DICDI	73.2	1.00E-12	DNA ligase 1 OS=Dictyostelium discoideum GN=lig1 PE=3 SV=1
Unigene11469_JingChaoZuZhi2	354	35	13.615	gi|156548640|ref|XP_001601668.1|	66.6	3.00E-10	PREDICTED: similar to kuzbanian [Nasonia vitripennis]	sp|Q10741|ADA10_BOVIN	58.5	1.00E-08	Disintegrin and metalloproteinase domain-containing protein 10 OS=Bos taurus GN=ADAM10 PE=1 SV=1
Unigene1146_JingChaoZuZhi2	244	17	9.5942	--	--	--	--	--	--	--	--
Unigene11470_JingChaoZuZhi2	1305	346	36.5105	gi|149259422|ref|XP_001472283.1|	201	4.00E-50	PREDICTED: translin-associated protein X isoform 1 [Mus musculus]	sp|Q9QZE7|TSNAX_MOUSE	201	7.00E-51	Translin-associated protein X OS=Mus musculus GN=Tsnax PE=1 SV=1
Unigene11471_JingChaoZuZhi2	963	118	16.8736	gi|115742980|ref|XP_001201362.1|	83.2	3.00E-22	PREDICTED: similar to cholinesterase 1 [Strongylocentrotus purpuratus] >gi|115911727|ref|XP_794231.2| PREDICTED: similar to cholinesterase 1 [Strongylocentrotus purpuratus]	sp|B2D0J5|EST6_APIME	88.6	2.00E-18	Venom carboxylesterase-6 OS=Apis mellifera PE=2 SV=1
Unigene11472_JingChaoZuZhi2	926	83	12.3429	gi|261331295|emb|CBH14285.1|	60.5	9.00E-08	T. brucei spp.-specific protein [Trypanosoma brucei gambiense DAL972]	sp|Q69566|U88_HHV6U	60.8	1.00E-08	Uncharacterized protein U88 OS=Human herpesvirus 6A (strain Uganda-1102) GN=U88 PE=4 SV=1
Unigene11473_JingChaoZuZhi2	1351	363	37.0001	gi|224050703|ref|XP_002196004.1|	537	1.00E-151	PREDICTED: RAD51 homolog (RecA homolog, E. coli) [Taeniopygia guttata]	sp|Q8MKI8|RAD51_CANFA	533	1.00E-150	DNA repair protein RAD51 homolog 1 OS=Canis familiaris GN=RAD51 PE=2 SV=1
Unigene11474_JingChaoZuZhi2	491	15	4.2069	--	--	--	--	--	--	--	--
Unigene11475_JingChaoZuZhi2	1057	126	16.4152	gi|307191731|gb|EFN75173.1|	285	2.00E-81	Paramyosin, long form [Harpegnathos saltator]	sp|P35415|MYSP1_DROME	265	2.00E-75	Paramyosin, long form OS=Drosophila melanogaster GN=Prm PE=1 SV=1
Unigene11476_JingChaoZuZhi2	299	86	39.6076	--	--	--	--	--	--	--	--
Unigene11477_JingChaoZuZhi2	548	60	15.0773	gi|296191086|ref|XP_002743472.1|	83.6	3.00E-15	PREDICTED: general transcription factor 3C polypeptide 5 [Callithrix jacchus]	sp|Q9Y5Q8|TF3C5_HUMAN	82	2.00E-15	General transcription factor 3C polypeptide 5 OS=Homo sapiens GN=GTF3C5 PE=1 SV=2
Unigene11478_JingChaoZuZhi2	1642	291	24.4046	gi|307176618|gb|EFN66086.1|	281	4.00E-74	Nuclear receptor corepressor 2 [Camponotus floridanus]	sp|Q60974|NCOR1_MOUSE	93.2	5.00E-18	Nuclear receptor corepressor 1 OS=Mus musculus GN=Ncor1 PE=1 SV=1
Unigene11479_JingChaoZuZhi2	456	26	7.8516	gi|66571325|ref|NP_001019243.1|	71.2	1.00E-11	integrin beta-like protein 1 [Danio rerio] >gi|66267505|gb|AAH95744.1| Integrin, beta-like 1 [Danio rerio]	sp|Q69566|U88_HHV6U	62	1.00E-09	Uncharacterized protein U88 OS=Human herpesvirus 6A (strain Uganda-1102) GN=U88 PE=4 SV=1
Unigene1147_JingChaoZuZhi2	684	191	38.4529	--	--	--	--	--	--	--	--
Unigene11480_JingChaoZuZhi2	354	16	6.224	--	--	--	--	--	--	--	--
Unigene11481_JingChaoZuZhi2	351	31	12.162	--	--	--	--	--	--	--	--
Unigene11482_JingChaoZuZhi2	349	56	22.096	gi|293359891|ref|XP_002729689.1|	55.5	6.00E-07	PREDICTED: hypothetical protein [Rattus norvegicus]	--	--	--	--
Unigene11483_JingChaoZuZhi2	730	106	19.9956	gi|119627579|gb|EAX07174.1|	115	1.00E-24	hCG1793893 [Homo sapiens]	sp|P13983|EXTN_TOBAC	116	2.00E-25	Extensin OS=Nicotiana tabacum GN=HRGPNT3 PE=2 SV=1
Unigene11484_JingChaoZuZhi2	1245	276	30.5275	--	--	--	--	--	--	--	--
Unigene11485_JingChaoZuZhi2	459	28	8.4003	--	--	--	--	--	--	--	--
Unigene11486_JingChaoZuZhi2	343	9	3.6133	--	--	--	--	--	--	--	--
Unigene11487_JingChaoZuZhi2	888	279	43.2656	--	--	--	--	--	--	--	--
Unigene11488_JingChaoZuZhi2	588	75	17.5645	gi|148706505|gb|EDL38452.1|	67	4.00E-10	mCG1050357 [Mus musculus]	sp|Q69566|U88_HHV6U	56.6	1.00E-07	Uncharacterized protein U88 OS=Human herpesvirus 6A (strain Uganda-1102) GN=U88 PE=4 SV=1
Unigene11489_JingChaoZuZhi2	331	30	12.4809	gi|193662169|ref|XP_001952270.1|	55.8	7.00E-09	PREDICTED: similar to AGAP006755-PA [Acyrthosiphon pisum]	sp|Q66II8|RU17_XENTR	51.6	6.00E-08	U1 small nuclear ribonucleoprotein 70 kDa OS=Xenopus tropicalis GN=snrnp70 PE=2 SV=1
Unigene1148_JingChaoZuZhi2	311	48	21.2536	gi|307210401|gb|EFN86966.1|	107	1.00E-22	26S proteasome non-ATPase regulatory subunit 2 [Harpegnathos saltator]	sp|Q5R9I6|PSMD2_PONAB	104	1.00E-22	26S proteasome non-ATPase regulatory subunit 2 OS=Pongo abelii GN=PSMD2 PE=2 SV=1
Unigene11490_JingChaoZuZhi2	362	38	14.4553	--	--	--	--	--	--	--	--
Unigene11491_JingChaoZuZhi2	472	49	14.2957	gi|66517287|ref|XP_391838.2|	107	1.00E-22	PREDICTED: similar to Neural conserved at 73EF CG11661-PF, isoform F isoform 1 [Apis mellifera]	sp|Q6P6Z8|ODO1_XENLA	94.7	2.00E-19	2-oxoglutarate dehydrogenase, mitochondrial OS=Xenopus laevis GN=ogdh PE=2 SV=1
Unigene11492_JingChaoZuZhi2	468	44	12.9467	--	--	--	--	--	--	--	--
Unigene11493_JingChaoZuZhi2	327	8	3.3689	--	--	--	--	--	--	--	--
Unigene11494_JingChaoZuZhi2	452	56	17.0609	--	--	--	--	--	--	--	--
Unigene11495_JingChaoZuZhi2	1019	118	15.9463	gi|170038740|ref|XP_001847206.1|	347	4.00E-94	phospholipid scramblase 1 [Culex quinquefasciatus] >gi|167882452|gb|EDS45835.1| phospholipid scramblase 1 [Culex quinquefasciatus]	sp|Q3ZBG9|PLS2_BOVIN	295	4.00E-79	Phospholipid scramblase 2 OS=Bos taurus GN=PLSCR2 PE=2 SV=1
Unigene11496_JingChaoZuZhi2	693	65	12.9161	gi|149588619|ref|NP_001076346.2|	266	5.00E-70	amidophosphoribosyltransferase [Danio rerio] >gi|148922264|gb|AAI46731.1| Phosphoribosyl pyrophosphate amidotransferase [Danio rerio]	sp|P28173|PUR1_CHICK	257	6.00E-68	Amidophosphoribosyltransferase OS=Gallus gallus GN=PPAT PE=2 SV=1
Unigene11497_JingChaoZuZhi2	703	47	9.2065	gi|237838763|ref|XP_002368679.1|	63.2	8.00E-09	voltage gated chloride channel domain-containing protein [Toxoplasma gondii ME49] >gi|211966343|gb|EEB01539.1| voltage gated chloride channel domain-containing protein [Toxoplasma gondii ME49]	sp|Q8BTI8|SRRM2_MOUSE	58.9	3.00E-08	Serine/arginine repetitive matrix protein 2 OS=Mus musculus GN=Srrm2 PE=1 SV=2
Unigene11498_JingChaoZuZhi2	664	101	20.9462	--	--	--	--	--	--	--	--
Unigene11499_JingChaoZuZhi2	542	75	19.0552	gi|307204038|gb|EFN82942.1|	66.2	5.00E-10	Zinc finger protein Xfin [Harpegnathos saltator]	sp|Q7M732|RTL1_MOUSE	62.4	2.00E-09	Retrotransposon-like protein 1 OS=Mus musculus GN=Rtl1 PE=2 SV=1
Unigene1149_JingChaoZuZhi2	1103	321	40.0757	gi|66520782|ref|XP_393125.2|	200	7.00E-50	PREDICTED: similar to syntaxin 6 [Apis mellifera]	sp|Q63635|STX6_RAT	147	2.00E-34	Syntaxin-6 OS=Rattus norvegicus GN=Stx6 PE=1 SV=1
Unigene114_JingChaoZuZhi2	480	155	44.4675	--	--	--	--	--	--	--	--
Unigene11500_JingChaoZuZhi2	809	103	17.5324	--	--	--	--	--	--	--	--
Unigene11501_JingChaoZuZhi2	449	21	6.4406	--	--	--	--	--	--	--	--
Unigene11502_JingChaoZuZhi2	399	24	8.283	--	--	--	--	--	--	--	--
Unigene11503_JingChaoZuZhi2	303	18	8.1805	--	--	--	--	--	--	--	--
Unigene11504_JingChaoZuZhi2	354	24	9.336	--	--	--	--	--	--	--	--
Unigene11505_JingChaoZuZhi2	261	10	5.2761	--	--	--	--	--	--	--	--
Unigene11506_JingChaoZuZhi2	277	34	16.9025	gi|170037275|ref|XP_001846484.1|	45.1	2.00E-06	catrin [Culex quinquefasciatus] >gi|167880393|gb|EDS43776.1| catrin [Culex quinquefasciatus]	--	--	--	--
Unigene11507_JingChaoZuZhi2	285	11	5.315	--	--	--	--	--	--	--	--
Unigene11508_JingChaoZuZhi2	415	71	23.5593	gi|189236879|ref|XP_001814566.1|	94.4	1.00E-18	PREDICTED: similar to PiggyBac transposable element-derived protein 4 [Tribolium castaneum]	sp|Q96DM1|PGBD4_HUMAN	75.9	7.00E-14	PiggyBac transposable element-derived protein 4 OS=Homo sapiens GN=PGBD4 PE=2 SV=3
Unigene11509_JingChaoZuZhi2	489	98	27.5975	gi|189234389|ref|XP_001815509.1|	69.7	4.00E-11	PREDICTED: similar to AGAP005091-PB [Tribolium castaneum]	sp|Q5XGM5|GDAP2_XENLA	59.3	1.00E-08	Ganglioside-induced differentiation-associated protein 2 OS=Xenopus laevis PE=2 SV=1
Unigene1150_JingChaoZuZhi2	242	10	5.6903	--	--	--	--	--	--	--	--
Unigene11510_JingChaoZuZhi2	263	29	15.1843	--	--	--	--	--	--	--	--
Unigene11511_JingChaoZuZhi2	331	23	9.5687	--	--	--	--	--	--	--	--
Unigene11512_JingChaoZuZhi2	1205	126	14.3991	--	--	--	--	--	--	--	--
Unigene11513_JingChaoZuZhi2	1248	164	18.0959	gi|195131785|ref|XP_002010326.1|	48.5	4.00E-07	GI15861 [Drosophila mojavensis] >gi|193908776|gb|EDW07643.1| GI15861 [Drosophila mojavensis]	--	--	--	--
Unigene11514_JingChaoZuZhi2	299	36	16.5799	--	--	--	--	--	--	--	--
Unigene11515_JingChaoZuZhi2	725	81	15.385	--	--	--	--	--	--	--	--
Unigene11516_JingChaoZuZhi2	313	36	15.8383	--	--	--	--	--	--	--	--
Unigene11517_JingChaoZuZhi2	520	63	16.6836	gi|195394852|ref|XP_002056053.1|	99	7.00E-20	GJ10726 [Drosophila virilis] >gi|194142762|gb|EDW59165.1| GJ10726 [Drosophila virilis]	sp|Q9VH39|NDUF4_DROME	91.3	3.00E-18	Protein NDUFAF4 homolog OS=Drosophila melanogaster GN=CG11722 PE=1 SV=1
Unigene11518_JingChaoZuZhi2	263	12	6.2831	gi|115928277|ref|XP_001198618.1|	63.2	3.00E-09	PREDICTED: similar to hydroxyproline-rich glycoprotein [Strongylocentrotus purpuratus] >gi|115970168|ref|XP_001187507.1| PREDICTED: similar to hydroxyproline-rich glycoprotein [Strongylocentrotus purpuratus]	sp|Q5VYV0|FOXB2_HUMAN	42	3.00E-06	Forkhead box protein B2 OS=Homo sapiens GN=FOXB2 PE=2 SV=1
Unigene11519_JingChaoZuZhi2	278	6	2.9721	gi|126343153|ref|XP_001371980.1|	56.2	3.00E-07	PREDICTED: similar to apolipoprotein D [Monodelphis domestica]	sp|Q8SPI0|APOD_MACFA	50.4	3.00E-06	Apolipoprotein D OS=Macaca fascicularis GN=APOD PE=2 SV=1
Unigene1151_JingChaoZuZhi2	423	16	5.2087	--	--	--	--	sp|P54197|CHI2_COCP7	51.6	1.00E-06	Endochitinase 2 OS=Coccidioides posadasii (strain C735) GN=CTS2 PE=3 SV=2
Unigene11520_JingChaoZuZhi2	332	9	3.733	--	--	--	--	--	--	--	--
Unigene11521_JingChaoZuZhi2	342	20	8.053	gi|195447964|ref|XP_002071449.1|	100	1.00E-20	GK25807 [Drosophila willistoni] >gi|194167534|gb|EDW82435.1| GK25807 [Drosophila willistoni]	sp|P86732|GAAP_HALAI	81.3	9.00E-18	Glycine, alanine and asparagine-rich protein OS=Haliotis asinina PE=1 SV=1
Unigene11522_JingChaoZuZhi2	317	13	5.6472	--	--	--	--	--	--	--	--
Unigene11523_JingChaoZuZhi2	1102	115	14.3704	--	--	--	--	--	--	--	--
Unigene11524_JingChaoZuZhi2	555	33	8.1879	gi|194766039|ref|XP_001965132.1|	66.6	4.00E-10	GF23569 [Drosophila ananassae] >gi|190617742|gb|EDV33266.1| GF23569 [Drosophila ananassae]	sp|Q9FPQ6|GP1_CHLRE	70.9	5.00E-12	Vegetative cell wall protein gp1 OS=Chlamydomonas reinhardtii GN=GP1 PE=2 SV=1
Unigene11525_JingChaoZuZhi2	394	54	18.8734	--	--	--	--	--	--	--	--
Unigene11526_JingChaoZuZhi2	433	104	33.0748	gi|261335934|emb|CBH09248.1|	108	7.00E-23	similar to CG18292 [Heliconius melpomene]	sp|Q9CPY4|CDKA2_MOUSE	91.7	1.00E-18	Cyclin-dependent kinase 2-associated protein 2 OS=Mus musculus GN=Cdk2ap2 PE=2 SV=1
Unigene11527_JingChaoZuZhi2	452	131	39.9103	--	--	--	--	--	--	--	--
Unigene11528_JingChaoZuZhi2	490	23	6.4637	gi|115694522|ref|XP_794945.2|	222	5.00E-75	PREDICTED: similar to scavenger receptor cysteine-rich protein type 12 precursor [Strongylocentrotus purpuratus] >gi|115975145|ref|XP_001193000.1| PREDICTED: similar to scavenger receptor cysteine-rich protein type 12 precursor [Strongylocentrotus purpuratus]	--	--	--	--
Unigene11529_JingChaoZuZhi2	265	7	3.6375	--	--	--	--	--	--	--	--
Unigene1152_JingChaoZuZhi2	216	4	2.5501	gi|149408945|ref|XP_001509982.1|	63.9	2.00E-09	PREDICTED: similar to endo-beta-N-acetylglucosaminidase [Ornithorhynchus anatinus]	--	--	--	--
Unigene11530_JingChaoZuZhi2	877	128	20.0984	gi|110759158|ref|XP_395855.3|	374	1.00E-102	PREDICTED: similar to transmembrane protein 57 [Apis mellifera]	sp|Q4V7D3|MACOI_RAT	362	2.00E-99	Macoilin OS=Rattus norvegicus GN=Tmem57 PE=2 SV=1
Unigene11531_JingChaoZuZhi2	1096	168	21.1082	--	--	--	--	--	--	--	--
Unigene11532_JingChaoZuZhi2	696	94	18.5982	--	--	--	--	--	--	--	--
Unigene11533_JingChaoZuZhi2	304	14	6.3417	gi|307200373|gb|EFN80616.1|	87.8	4.00E-17	RAB6IP1-like protein [Harpegnathos saltator]	sp|Q6NXD8|DEN5B_DANRE	79	9.00E-15	DENN domain-containing protein 5B OS=Danio rerio GN=dennd5b PE=2 SV=2
Unigene11534_JingChaoZuZhi2	306	31	13.9506	--	--	--	--	--	--	--	--
Unigene11535_JingChaoZuZhi2	1116	264	32.5755	gi|119593994|gb|EAW73588.1|	60.8	9.00E-08	acrosin, isoform CRA_b [Homo sapiens]	sp|A7XQ02|MLX56_MORAL	59.7	4.00E-08	Mulatexin OS=Morus alba PE=1 SV=2
Unigene11536_JingChaoZuZhi2	287	9	4.3183	gi|118104085|ref|XP_424835.2|	48.1	1.00E-12	PREDICTED: similar to mKIAA1258 protein [Gallus gallus]	sp|Q07729|GUAD_YEAST	53.9	7.00E-13	Probable guanine deaminase OS=Saccharomyces cerevisiae GN=GUD1 PE=1 SV=1
Unigene11537_JingChaoZuZhi2	415	29	9.6228	--	--	--	--	--	--	--	--
Unigene11538_JingChaoZuZhi2	1279	170	18.3033	gi|157818101|ref|NP_001099999.1|	456	1.00E-139	kinesin family member 3B [Rattus norvegicus]	sp|Q61771|KIF3B_MOUSE	455	2.00E-139	Kinesin-like protein KIF3B OS=Mus musculus GN=Kif3b PE=1 SV=1
Unigene11539_JingChaoZuZhi2	292	8	3.7728	--	--	--	--	--	--	--	--
Unigene1153_JingChaoZuZhi2	192	2	1.4344	gi|124803667|ref|XP_001347784.1|	75.9	4.00E-13	asparagine-rich antigen [Plasmodium falciparum 3D7] >gi|23496035|gb|AAN35697.1|AE014837_39 asparagine-rich antigen [Plasmodium falciparum 3D7]	sp|Q9WU62|INCE_MOUSE	51.2	2.00E-06	Inner centromere protein OS=Mus musculus GN=Incenp PE=1 SV=2
Unigene11540_JingChaoZuZhi2	325	24	10.169	--	--	--	--	--	--	--	--
Unigene11541_JingChaoZuZhi2	297	12	5.5639	--	--	--	--	--	--	--	--
Unigene11542_JingChaoZuZhi2	316	25	10.8944	--	--	--	--	--	--	--	--
Unigene11543_JingChaoZuZhi2	487	36	10.1795	gi|159155879|gb|AAI54436.1|	227	1.00E-58	Zgc:152944 protein [Danio rerio]	sp|Q9NRP7|STK36_HUMAN	223	4.00E-58	Serine/threonine-protein kinase 36 OS=Homo sapiens GN=STK36 PE=1 SV=2
Unigene11544_JingChaoZuZhi2	271	41	20.8337	--	--	--	--	--	--	--	--
Unigene11545_JingChaoZuZhi2	435	47	14.8785	gi|157841282|ref|NP_001103213.1|	54.7	1.00E-06	SKI family transcriptional corepressor 2 [Mus musculus] >gi|189082692|sp|A7M7C7.1|SKOR2_MOUSE RecName: Full=SKI family transcriptional corepressor 2; AltName: Full=Fussel-18 homolog; AltName: Full=LBX1 corepressor 1-like protein; AltName: Full=Ladybird homeobox corepressor 1-like protein; AltName: Full=Transcriptional corepressor Corl2 >gi|156563483|dbj|BAF76044.1| transcriptional corepressor Cor…	sp|A7M7C7|SKOR2_MOUSE	54.7	2.00E-07	SKI family transcriptional corepressor 2 OS=Mus musculus GN=Skor2 PE=1 SV=1
Unigene11546_JingChaoZuZhi2	1033	222	29.5941	--	--	--	--	--	--	--	--
Unigene11547_JingChaoZuZhi2	647	42	8.9392	--	--	--	--	--	--	--	--
Unigene11548_JingChaoZuZhi2	281	21	10.2912	gi|307172257|gb|EFN63762.1|	77.8	1.00E-13	Kinesin-like protein KIF13A [Camponotus floridanus]	--	--	--	--
Unigene11549_JingChaoZuZhi2	743	166	30.766	gi|149640556|ref|XP_001507898.1|	77	2.00E-15	PREDICTED: similar to MDN1, midasin homolog (yeast) [Ornithorhynchus anatinus]	sp|Q9NU22|MDN1_HUMAN	72.8	2.00E-12	Midasin OS=Homo sapiens GN=MDN1 PE=1 SV=2
Unigene1154_JingChaoZuZhi2	940	170	24.9042	gi|167387750|ref|XP_001738292.1|	79.7	1.00E-13	suppressor protein SRP40 [Entamoeba dispar SAW760]	sp|Q6ZS17|FA65A_HUMAN	64.7	9.00E-10	Protein FAM65A OS=Homo sapiens GN=FAM65A PE=1 SV=1
Unigene11550_JingChaoZuZhi2	1091	187	23.6031	gi|82265928|sp|Q4SK88.1|CPIN1_TETNG	159	8.00E-52	RecName: Full=Anamorsin; AltName: Full=Cytokine-induced apoptosis inhibitor 1; AltName: Full=Fe-S cluster assembly protein DRE2 homolog	sp|Q4SK88|CPIN1_TETNG	159	2.00E-52	Anamorsin OS=Tetraodon nigroviridis GN=ciapin1 PE=3 SV=1
Unigene11551_JingChaoZuZhi2	564	97	23.6834	--	--	--	--	--	--	--	--
Unigene11552_JingChaoZuZhi2	427	26	8.3849	--	--	--	--	--	--	--	--
Unigene11553_JingChaoZuZhi2	296	154	71.6442	--	--	--	--	--	--	--	--
Unigene11554_JingChaoZuZhi2	345	30	11.9744	gi|291394029|ref|XP_002713240.1|	88.6	6.00E-17	PREDICTED: zinc finger protein 717-like [Oryctolagus cuniculus]	sp|Q86TJ5|ZN554_HUMAN	87.8	2.00E-17	Zinc finger protein 554 OS=Homo sapiens GN=ZNF554 PE=2 SV=1
Unigene11555_JingChaoZuZhi2	445	16	4.9512	gi|170572343|ref|XP_001892072.1|	71.2	1.00E-11	T-cell receptor beta chain ANA 11 [Brugia malayi]	sp|Q69566|U88_HHV6U	56.2	7.00E-08	Uncharacterized protein U88 OS=Human herpesvirus 6A (strain Uganda-1102) GN=U88 PE=4 SV=1
Unigene11556_JingChaoZuZhi2	324	12	5.1002	--	--	--	--	--	--	--	--
Unigene11557_JingChaoZuZhi2	274	19	9.5489	gi|40642978|emb|CAD90766.1|	54.7	1.00E-06	Inhibitory SMAD [Crassostrea gigas]	--	--	--	--
Unigene11558_JingChaoZuZhi2	3371	747	30.515	gi|307205760|gb|EFN83990.1|	1046	0	DNA damage-binding protein 1 [Harpegnathos saltator]	sp|Q6P6Z0|DDB1_XENLA	1031	0	DNA damage-binding protein 1 OS=Xenopus laevis GN=ddb1 PE=2 SV=1
Unigene11559_JingChaoZuZhi2	405	28	9.5204	--	--	--	--	--	--	--	--
Unigene1155_JingChaoZuZhi2	313	44	19.358	gi|193603748|ref|XP_001946649.1|	117	2.00E-25	PREDICTED: similar to AGAP001046-PA [Acyrthosiphon pisum]	sp|Q9NYB9|ABI2_HUMAN	110	3.00E-24	Abl interactor 2 OS=Homo sapiens GN=ABI2 PE=1 SV=1
Unigene11560_JingChaoZuZhi2	851	144	23.3015	gi|116284392|ref|NP_002448.2|	85.5	2.00E-17	mucin-2 precursor [Homo sapiens]	sp|Q02817|MUC2_HUMAN	87.8	8.00E-17	Mucin-2 OS=Homo sapiens GN=MUC2 PE=1 SV=2
Unigene11561_JingChaoZuZhi2	541	64	16.2905	gi|91088679|ref|XP_974920.1|	280	2.00E-74	PREDICTED: similar to defective in cullin neddylation protein [Tribolium castaneum]	sp|Q4V8B2|DCNL3_RAT	224	2.00E-58	DCN1-like protein 3 OS=Rattus norvegicus GN=Dcun1d3 PE=2 SV=1
Unigene11562_JingChaoZuZhi2	384	24	8.6066	--	--	--	--	--	--	--	--
Unigene11563_JingChaoZuZhi2	457	42	12.6557	gi|58383446|ref|XP_312549.2|	172	4.00E-42	AGAP002403-PA [Anopheles gambiae str. PEST] >gi|55242375|gb|EAA08112.2| AGAP002403-PA [Anopheles gambiae str. PEST]	sp|Q568Q0|NUD18_DANRE	64.3	3.00E-10	Nucleoside diphosphate-linked moiety X motif 18 OS=Danio rerio GN=nudt18 PE=2 SV=1
Unigene11564_JingChaoZuZhi2	1031	222	29.6515	gi|190702384|gb|ACE75277.1|	224	5.00E-57	transposase-like protein [Glyptapanteles flavicoxis]	sp|P34257|TC3A_CAEEL	54.7	1.00E-06	Transposable element Tc3 transposase OS=Caenorhabditis elegans GN=tc3a PE=1 SV=1
Unigene11565_JingChaoZuZhi2	402	22	7.5361	gi|61162135|dbj|BAD91056.1|	240	1.00E-62	Cj-cadherin [Caridina japonica]	sp|O15943|CADN_DROME	190	2.00E-48	Neural-cadherin OS=Drosophila melanogaster GN=CadN PE=1 SV=2
Unigene11566_JingChaoZuZhi2	312	16	7.0618	--	--	--	--	--	--	--	--
Unigene11567_JingChaoZuZhi2	946	100	14.5566	--	--	--	--	--	--	--	--
Unigene11568_JingChaoZuZhi2	1026	140	18.7902	gi|110749173|ref|XP_001121146.1|	177	6.00E-43	PREDICTED: similar to bab2 CG9102-PA, partial [Apis mellifera]	sp|Q9W0K7|BAB1_DROME	158	5.00E-38	Protein bric-a-brac 1 OS=Drosophila melanogaster GN=bab1 PE=2 SV=2
Unigene11569_JingChaoZuZhi2	283	12	5.8391	gi|296477589|gb|DAA19704.1|	65.9	4.00E-10	proline rich 12 [Bos taurus]	sp|Q9FPQ6|GP1_CHLRE	61.2	2.00E-09	Vegetative cell wall protein gp1 OS=Chlamydomonas reinhardtii GN=GP1 PE=2 SV=1
Unigene1156_JingChaoZuZhi2	210	93	60.9839	--	--	--	--	--	--	--	--
Unigene11570_JingChaoZuZhi2	1078	216	27.5922	--	--	--	--	--	--	--	--
Unigene11571_JingChaoZuZhi2	260	13	6.8853	gi|237839061|ref|XP_002368828.1|	66.6	2.00E-10	RNA recognition motif-containing protein [Toxoplasma gondii ME49] >gi|211966492|gb|EEB01688.1| RNA recognition motif-containing protein [Toxoplasma gondii ME49]	sp|Q5T200|ZC3HD_HUMAN	59.7	6.00E-09	Zinc finger CCCH domain-containing protein 13 OS=Homo sapiens GN=ZC3H13 PE=1 SV=1
Unigene11572_JingChaoZuZhi2	322	23	9.8361	--	--	--	--	--	--	--	--
Unigene11573_JingChaoZuZhi2	308	96	42.9212	--	--	--	--	--	--	--	--
Unigene11574_JingChaoZuZhi2	448	71	21.8239	--	--	--	--	--	--	--	--
Unigene11575_JingChaoZuZhi2	287	32	15.3539	gi|292616561|ref|XP_002663079.1|	112	5.00E-24	PREDICTED: low density lipoprotein receptor-related protein 4-like [Danio rerio]	sp|Q9QYP1|LRP4_RAT	106	5.00E-23	Low-density lipoprotein receptor-related protein 4 OS=Rattus norvegicus GN=Lrp4 PE=2 SV=2
Unigene11576_JingChaoZuZhi2	281	13	6.3707	--	--	--	--	--	--	--	--
Unigene11577_JingChaoZuZhi2	270	10	5.1002	--	--	--	--	--	--	--	--
Unigene11578_JingChaoZuZhi2	303	14	6.3626	--	--	--	--	--	--	--	--
Unigene11579_JingChaoZuZhi2	1036	223	29.6413	gi|158296950|ref|XP_317277.4|	202	1.00E-50	AGAP008190-PA [Anopheles gambiae str. PEST] >gi|157014959|gb|EAA12448.4| AGAP008190-PA [Anopheles gambiae str. PEST]	sp|Q8NFZ3|NLGNY_HUMAN	95.5	5.00E-19	Neuroligin-4, Y-linked OS=Homo sapiens GN=NLGN4Y PE=2 SV=1
Unigene1157_JingChaoZuZhi2	772	211	37.6372	gi|115634648|ref|XP_780950.2|	164	4.00E-39	PREDICTED: similar to OSJNBa0011F23.1 [Strongylocentrotus purpuratus] >gi|115955988|ref|XP_001181316.1| PREDICTED: similar to OSJNBa0011F23.1 [Strongylocentrotus purpuratus]	sp|P03356|POL_MLVAV	70.9	9.00E-12	Pol polyprotein OS=AKV murine leukemia virus GN=pol PE=3 SV=2
Unigene11580_JingChaoZuZhi2	410	35	11.7554	gi|74865845|sp|Q8MP30.1|Y7791_DICDI	76.6	2.00E-13	RecName: Full=Uncharacterized histidine-rich protein DDB_G0274557; Flags: Precursor	sp|Q8MP30|Y7791_DICDI	76.6	4.00E-14	Uncharacterized histidine-rich protein DDB_G0274557 OS=Dictyostelium discoideum GN=DDB_G0274557 PE=4 SV=1
Unigene11581_JingChaoZuZhi2	872	95	15.0023	gi|307178165|gb|EFN66973.1|	166	1.00E-39	Tyrosine-protein phosphatase 69D [Camponotus floridanus]	sp|P16620|PTP69_DROME	144	8.00E-34	Tyrosine-protein phosphatase 69D OS=Drosophila melanogaster GN=Ptp69D PE=1 SV=2
Unigene11582_JingChaoZuZhi2	301	40	18.2998	--	--	--	--	--	--	--	--
Unigene11583_JingChaoZuZhi2	731	126	23.7359	--	--	--	--	--	--	--	--
Unigene11584_JingChaoZuZhi2	646	169	36.0252	gi|41054035|ref|NP_956186.1|	103	4.00E-29	CAAX prenyl protease 1 homolog [Danio rerio] >gi|28422776|gb|AAH46884.1| Zinc metallopeptidase, STE24 homolog [Danio rerio]	sp|Q80W54|FACE1_MOUSE	103	1.00E-21	CAAX prenyl protease 1 homolog OS=Mus musculus GN=Zmpste24 PE=1 SV=2
Unigene11585_JingChaoZuZhi2	443	26	8.082	gi|284022406|gb|ADB65770.1|	204	5.00E-75	drosha [Marsupenaeus japonicus]	sp|Q9NRR4|RNC_HUMAN	124	8.00E-47	Ribonuclease 3 OS=Homo sapiens GN=RNASEN PE=1 SV=2
Unigene11586_JingChaoZuZhi2	266	23	11.9069	--	--	--	--	--	--	--	--
Unigene11587_JingChaoZuZhi2	800	39	6.7132	gi|147904048|ref|NP_001087073.1|	90.9	3.00E-19	Aladin [Xenopus laevis] >gi|50415177|gb|AAH77988.1| Aaas-prov protein [Xenopus laevis]	sp|Q9NRG9|AAAS_HUMAN	90.5	1.00E-17	Aladin OS=Homo sapiens GN=AAAS PE=1 SV=1
Unigene11588_JingChaoZuZhi2	466	37	10.9337	--	--	--	--	--	--	--	--
Unigene11589_JingChaoZuZhi2	761	80	14.4763	--	--	--	--	--	--	--	--
Unigene1158_JingChaoZuZhi2	258	23	12.2761	--	--	--	--	--	--	--	--
Unigene11590_JingChaoZuZhi2	714	64	12.3434	gi|156548202|ref|XP_001607031.1|	157	3.00E-37	PREDICTED: similar to Nucleolar protein family 6 (RNA-associated) [Nasonia vitripennis]	sp|Q5M7P5|NOL6_XENTR	136	2.00E-31	Nucleolar protein 6 OS=Xenopus tropicalis GN=nol6 PE=2 SV=1
Unigene11591_JingChaoZuZhi2	445	69	21.3521	gi|157278561|ref|NP_001098381.1|	169	3.00E-41	conserved edge expressed protein [Oryzias latipes] >gi|121281842|gb|ABM53480.1| conserved edge expressed protein [Oryzias latipes]	sp|Q9D1H7|GET4_MOUSE	166	4.00E-41	Golgi to ER traffic protein 4 homolog OS=Mus musculus GN=Get4 PE=2 SV=2
Unigene11592_JingChaoZuZhi2	271	13	6.6058	gi|33086440|gb|AAP92532.1|	77.4	1.00E-13	Ab1-013 [Rattus norvegicus] >gi|149025437|gb|EDL81804.1| rCG63023 [Rattus norvegicus]	sp|Q54F38|H3V1_DICDI	57	4.00E-08	Histone H3.v1 OS=Dictyostelium discoideum GN=H3v1 PE=3 SV=1
Unigene11593_JingChaoZuZhi2	474	40	11.6207	--	--	--	--	--	--	--	--
Unigene11594_JingChaoZuZhi2	413	56	18.672	--	--	--	--	--	--	--	--
Unigene11595_JingChaoZuZhi2	913	57	8.5972	--	--	--	--	--	--	--	--
Unigene11596_JingChaoZuZhi2	361	40	15.2582	--	--	--	--	--	--	--	--
Unigene11597_JingChaoZuZhi2	376	23	8.4235	--	--	--	--	--	--	--	--
Unigene11598_JingChaoZuZhi2	276	15	7.484	gi|32812298|gb|AAP88020.1|AF355752_1	41.6	3.00E-09	reverse transcriptase [Chelonia mydas]	--	--	--	--
Unigene11599_JingChaoZuZhi2	339	64	25.9975	--	--	--	--	--	--	--	--
Unigene1159_JingChaoZuZhi2	216	16	10.2004	gi|156328475|ref|XP_001618936.1|	53.1	3.00E-06	hypothetical protein NEMVEDRAFT_v1g47150 [Nematostella vectensis] >gi|156200971|gb|EDO26836.1| predicted protein [Nematostella vectensis]	sp|Q9BZA8|PC11Y_HUMAN	49.3	7.00E-06	Protocadherin-11 Y-linked OS=Homo sapiens GN=PCDH11Y PE=1 SV=1
Unigene115_JingChaoZuZhi2	2967	756	35.0878	gi|58394427|ref|XP_320723.2|	64.3	3.00E-08	CLIP-domain serine protease subfamily A (AGAP011792-PA) [Anopheles gambiae str. PEST] >gi|55234890|gb|EAA00414.2| CLIP-domain serine protease subfamily A (AGAP011792-PA) [Anopheles gambiae str. PEST]	sp|Q84ZL0|FH5_ORYSJ	62.8	1.00E-08	Formin-like protein 5 OS=Oryza sativa subsp. japonica GN=FH5 PE=2 SV=2
Unigene11600_JingChaoZuZhi2	414	28	9.3134	gi|254587275|emb|CAX83694.1|	69.7	3.00E-11	Gap-Pol polyprotein [Schistosoma japonicum]	sp|P23074|POL_SFV1	50.1	4.00E-06	Pro-Pol polyprotein OS=Simian foamy virus type 1 GN=pol PE=1 SV=3
Unigene11601_JingChaoZuZhi2	291	25	11.8304	--	--	--	--	--	--	--	--
Unigene11602_JingChaoZuZhi2	551	44	10.9965	gi|296194492|ref|XP_002744969.1|	159	5.00E-50	PREDICTED: importin-11 isoform 1 [Callithrix jacchus] >gi|296194494|ref|XP_002744970.1| PREDICTED: importin-11 isoform 2 [Callithrix jacchus]	sp|Q8K2V6|IPO11_MOUSE	159	1.00E-50	Importin-11 OS=Mus musculus GN=Ipo11 PE=1 SV=1
Unigene11603_JingChaoZuZhi2	525	99	25.9674	--	--	--	--	--	--	--	--
Unigene11604_JingChaoZuZhi2	949	93	13.4949	gi|62751601|ref|NP_001015743.1|	461	1.00E-128	cytoplasmic tRNA 2-thiolation protein 1 [Xenopus (Silurana) tropicalis] >gi|82179029|sp|Q5FW05.1|CTU1_XENTR RecName: Full=Cytoplasmic tRNA 2-thiolation protein 1; AltName: Full=ATP-binding domain-containing protein 3; AltName: Full=Cytoplasmic tRNA adenylyltransferase 1 >gi|58476345|gb|AAH89678.1| MGC107918 protein [Xenopus (Silurana) tropicalis]	sp|Q5FW05|CTU1_XENTR	461	3.00E-129	Cytoplasmic tRNA 2-thiolation protein 1 OS=Xenopus tropicalis GN=ctu1 PE=2 SV=1
Unigene11605_JingChaoZuZhi2	1002	97	13.3308	gi|195117254|ref|XP_002003164.1|	473	1.00E-159	GI17764 [Drosophila mojavensis] >gi|193913739|gb|EDW12606.1| GI17764 [Drosophila mojavensis]	sp|Q03043|KGP24_DROME	471	4.00E-158	cGMP-dependent protein kinase, isozyme 2 forms cD4/T1/T3A/T3B OS=Drosophila melanogaster GN=for PE=1 SV=3
Unigene11606_JingChaoZuZhi2	319	12	5.1801	gi|1480863|gb|AAB05810.1|	65.9	1.00E-10	super cysteine rich protein [Homo sapiens]	sp|Q55GG4|Y9847_DICDI	56.6	5.00E-08	Probable serine/threonine-protein kinase DDB_G0267686 OS=Dictyostelium discoideum GN=DDB_G0267686 PE=3 SV=1
Unigene11607_JingChaoZuZhi2	417	81	26.7486	--	--	--	--	--	--	--	--
Unigene11608_JingChaoZuZhi2	1310	120	12.6143	gi|193704619|ref|XP_001944223.1|	691	0	PREDICTED: similar to myosin-rhogap protein, myr [Acyrthosiphon pisum]	sp|Q9Z1N3|MYO9A_RAT	533	1.00E-150	Myosin-IXa OS=Rattus norvegicus GN=Myo9a PE=1 SV=1
Unigene11609_JingChaoZuZhi2	270	49	24.991	--	--	--	--	--	--	--	--
Unigene1160_JingChaoZuZhi2	498	59	16.3145	gi|74865845|sp|Q8MP30.1|Y7791_DICDI	77	2.00E-13	RecName: Full=Uncharacterized histidine-rich protein DDB_G0274557; Flags: Precursor	sp|Q8MP30|Y7791_DICDI	77	5.00E-14	Uncharacterized histidine-rich protein DDB_G0274557 OS=Dictyostelium discoideum GN=DDB_G0274557 PE=4 SV=1
Unigene11610_JingChaoZuZhi2	704	93	18.1912	--	--	--	--	--	--	--	--
Unigene11611_JingChaoZuZhi2	280	8	3.9344	--	--	--	--	--	--	--	--
Unigene11612_JingChaoZuZhi2	458	76	22.8507	--	--	--	--	--	--	--	--
Unigene11613_JingChaoZuZhi2	1799	240	18.371	--	--	--	--	--	--	--	--
Unigene11614_JingChaoZuZhi2	314	75	32.8915	--	--	--	--	--	--	--	--
Unigene11615_JingChaoZuZhi2	510	61	16.4707	--	--	--	--	--	--	--	--
Unigene11616_JingChaoZuZhi2	1260	238	26.0111	gi|115613112|ref|XP_793931.2|	134	7.00E-30	PREDICTED: similar to fibropellin Ia [Strongylocentrotus purpuratus] >gi|115937319|ref|XP_001195619.1| PREDICTED: similar to fibropellin Ia [Strongylocentrotus purpuratus]	--	--	--	--
Unigene11617_JingChaoZuZhi2	866	76	12.085	--	--	--	--	--	--	--	--
Unigene11618_JingChaoZuZhi2	348	20	7.9141	--	--	--	--	--	--	--	--
Unigene11619_JingChaoZuZhi2	558	32	7.8971	--	--	--	--	--	--	--	--
Unigene1161_JingChaoZuZhi2	250	10	5.5082	--	--	--	--	--	--	--	--
Unigene11620_JingChaoZuZhi2	340	29	11.7455	gi|117670124|gb|ABK56706.1|	112	3.00E-24	notch protein [Parhyale hawaiensis]	sp|Q04721|NOTC2_HUMAN	60.5	3.00E-09	Neurogenic locus notch homolog protein 2 OS=Homo sapiens GN=NOTCH2 PE=1 SV=3
Unigene11621_JingChaoZuZhi2	1640	555	46.6016	gi|1169866|sp|P41776.2|GNAI_HOMAM	267	8.00E-70	RecName: Full=Guanine nucleotide-binding protein G(i) subunit alpha; AltName: Full=Adenylate cyclase-inhibiting G alpha protein	sp|P41776|GNAI_HOMAM	267	1.00E-70	Guanine nucleotide-binding protein G(i) subunit alpha OS=Homarus americanus PE=2 SV=2
Unigene11622_JingChaoZuZhi2	295	13	6.0684	--	--	--	--	--	--	--	--
Unigene11623_JingChaoZuZhi2	452	51	15.5376	gi|167525000|ref|XP_001746835.1|	38.9	4.00E-06	hypothetical protein [Monosiga brevicollis MX1] >gi|163774615|gb|EDQ88242.1| predicted protein [Monosiga brevicollis MX1]	--	--	--	--
Unigene11624_JingChaoZuZhi2	350	19	7.4754	gi|156548110|ref|XP_001606503.1|	59.3	4.00E-08	PREDICTED: similar to neuroblastoma-amplified protein [Nasonia vitripennis]	sp|Q5TYW4|NBAS_DANRE	50.8	3.00E-06	Neuroblastoma-amplified sequence OS=Danio rerio GN=nbas PE=2 SV=1
Unigene11625_JingChaoZuZhi2	383	20	7.1909	--	--	--	--	--	--	--	--
Unigene11626_JingChaoZuZhi2	295	11	5.1348	gi|218783276|dbj|BAH03657.1|	52	5.00E-09	huntingtin [Callithrix jacchus]	sp|O73590|ZFHX4_CHICK	43.1	8.00E-07	Zinc finger homeobox protein 4 OS=Gallus gallus GN=ZFHX4 PE=2 SV=2
Unigene11627_JingChaoZuZhi2	306	12	5.4002	gi|170042963|ref|XP_001849175.1|	101	9.00E-21	Tubby [Culex quinquefasciatus] >gi|167866377|gb|EDS29760.1| Tubby [Culex quinquefasciatus]	sp|Q9NRJ4|TULP4_HUMAN	66.6	4.00E-11	Tubby-related protein 4 OS=Homo sapiens GN=TULP4 PE=1 SV=2
Unigene11628_JingChaoZuZhi2	467	31	9.1411	gi|170029993|ref|XP_001842875.1|	174	2.00E-65	histone acetyltransferase Tip60 [Culex quinquefasciatus] >gi|167865335|gb|EDS28718.1| histone acetyltransferase Tip60 [Culex quinquefasciatus]	sp|Q960X4|TIP60_DROME	166	8.00E-64	Histone acetyltransferase Tip60 OS=Drosophila melanogaster GN=Tip60 PE=1 SV=1
Unigene11629_JingChaoZuZhi2	290	27	12.8209	--	--	--	--	--	--	--	--
Unigene1162_JingChaoZuZhi2	2013	604	41.3185	gi|307764160|gb|EFO23394.1|	279	3.00E-73	actin family protein [Loa loa]	sp|P14883|ACT2_PLAFO	174	2.00E-42	Actin-2 OS=Plasmodium falciparum (isolate NF54) PE=2 SV=1
Unigene11630_JingChaoZuZhi2	505	104	28.3592	gi|261331295|emb|CBH14285.1|	54.7	1.00E-06	T. brucei spp.-specific protein [Trypanosoma brucei gambiense DAL972]	sp|Q69566|U88_HHV6U	54.3	4.00E-07	Uncharacterized protein U88 OS=Human herpesvirus 6A (strain Uganda-1102) GN=U88 PE=4 SV=1
Unigene11631_JingChaoZuZhi2	557	71	17.5531	--	--	--	--	--	--	--	--
Unigene11632_JingChaoZuZhi2	326	16	6.7586	gi|210147517|ref|NP_957378.2|	104	4.00E-35	CDC5 cell division cycle 5-like [Danio rerio]	sp|A7SD85|CDC5L_NEMVE	94.4	4.00E-29	Cell division cycle 5-related protein OS=Nematostella vectensis GN=cdc5l PE=3 SV=1
Unigene11633_JingChaoZuZhi2	618	34	7.576	gi|307182735|gb|EFN69859.1|	266	2.00E-80	Ras-related protein Rab-32 [Camponotus floridanus]	sp|Q9CZE3|RAB32_MOUSE	244	4.00E-73	Ras-related protein Rab-32 OS=Mus musculus GN=Rab32 PE=2 SV=3
Unigene11634_JingChaoZuZhi2	945	144	20.9837	--	--	--	--	--	--	--	--
Unigene11635_JingChaoZuZhi2	501	60	16.4917	gi|195350163|ref|XP_002041611.1|	57	3.00E-07	GM16758 [Drosophila sechellia] >gi|194123384|gb|EDW45427.1| GM16758 [Drosophila sechellia]	sp|Q8STA9|Y5G8_ENCCU	58.2	3.00E-08	UPF0329 protein ECU05_1680/ECU11_0050 OS=Encephalitozoon cuniculi GN=ECU05_1680 PE=3 SV=1
Unigene11636_JingChaoZuZhi2	3072	578	25.9095	gi|110749375|ref|XP_397118.3|	794	0	PREDICTED: similar to CG8557-PA, isoform A [Apis mellifera]	sp|O15013|ARHGA_HUMAN	380	2.00E-104	Rho guanine nucleotide exchange factor 10 OS=Homo sapiens GN=ARHGEF10 PE=1 SV=4
Unigene11637_JingChaoZuZhi2	320	26	11.1886	gi|198449369|ref|XP_001357563.2|	119	4.00E-26	GA11363 [Drosophila pseudoobscura pseudoobscura] >gi|198130575|gb|EAL26697.2| GA11363 [Drosophila pseudoobscura pseudoobscura]	sp|Q5RDF5|JAZF1_PONAB	98.2	1.00E-20	Juxtaposed with another zinc finger protein 1 OS=Pongo abelii GN=JAZF1 PE=2 SV=1
Unigene11638_JingChaoZuZhi2	279	36	17.7685	--	--	--	--	--	--	--	--
Unigene11639_JingChaoZuZhi2	288	26	12.4318	gi|119627579|gb|EAX07174.1|	58.5	4.00E-11	hCG1793893 [Homo sapiens]	sp|Q9LUI1|LRX6_ARATH	63.5	4.00E-11	Leucine-rich repeat extensin-like protein 6 OS=Arabidopsis thaliana GN=LRX6 PE=2 SV=1
Unigene1163_JingChaoZuZhi2	226	8	4.8745	gi|261331295|emb|CBH14285.1|	54.7	1.00E-06	T. brucei spp.-specific protein [Trypanosoma brucei gambiense DAL972]	sp|Q69566|U88_HHV6U	49.3	8.00E-06	Uncharacterized protein U88 OS=Human herpesvirus 6A (strain Uganda-1102) GN=U88 PE=4 SV=1
Unigene11640_JingChaoZuZhi2	379	23	8.3568	--	--	--	--	--	--	--	--
Unigene11641_JingChaoZuZhi2	651	120	25.3835	gi|110750103|ref|XP_001121584.1|	131	2.00E-29	PREDICTED: similar to LIM and SH3 domain protein F42H10.3 [Apis mellifera]	sp|P34416|LASP1_CAEEL	110	6.00E-24	LIM and SH3 domain protein F42H10.3 OS=Caenorhabditis elegans GN=F42H10.3 PE=2 SV=3
Unigene11642_JingChaoZuZhi2	677	65	13.2214	gi|66551883|ref|XP_624228.1|	121	2.00E-26	PREDICTED: similar to CG6422-PA, isoform A [Apis mellifera]	sp|Q4R5D9|YTHD2_MACFA	85.1	4.00E-16	YTH domain family protein 2 OS=Macaca fascicularis GN=YTHDF2 PE=2 SV=1
Unigene11643_JingChaoZuZhi2	375	14	5.141	--	--	--	--	--	--	--	--
Unigene11644_JingChaoZuZhi2	267	12	6.189	gi|281398547|gb|ADA68116.1|	116	3.00E-25	Prdm9 [Apodemus sylvaticus]	sp|P51523|ZNF84_HUMAN	108	1.00E-23	Zinc finger protein 84 OS=Homo sapiens GN=ZNF84 PE=2 SV=2
Unigene11645_JingChaoZuZhi2	375	20	7.3443	--	--	--	--	--	--	--	--
Unigene11646_JingChaoZuZhi2	258	14	7.4724	--	--	--	--	--	--	--	--
Unigene11647_JingChaoZuZhi2	328	26	10.9157	--	--	--	--	--	--	--	--
Unigene11648_JingChaoZuZhi2	531	121	31.3793	--	--	--	--	--	--	--	--
Unigene11649_JingChaoZuZhi2	937	122	17.9297	--	--	--	--	--	--	--	--
Unigene1164_JingChaoZuZhi2	264	112	58.4206	gi|115655475|ref|XP_001196818.1|	89.4	4.00E-17	PREDICTED: similar to endonuclease/reverse transcriptase [Strongylocentrotus purpuratus] >gi|115935102|ref|XP_001196166.1| PREDICTED: similar to endonuclease/reverse transcriptase [Strongylocentrotus purpuratus]	--	--	--	--
Unigene11650_JingChaoZuZhi2	424	33	10.7177	--	--	--	--	--	--	--	--
Unigene11651_JingChaoZuZhi2	296	14	6.5131	--	--	--	--	--	--	--	--
Unigene11652_JingChaoZuZhi2	578	49	11.674	gi|239792284|dbj|BAH72501.1|	87.4	6.00E-20	ACYPI000161 [Acyrthosiphon pisum]	sp|Q8CEG5|CC28B_MOUSE	55.8	2.00E-07	Coiled-coil domain-containing protein 28B OS=Mus musculus GN=Ccdc28b PE=2 SV=2
Unigene11653_JingChaoZuZhi2	266	15	7.7654	--	--	--	--	--	--	--	--
Unigene11654_JingChaoZuZhi2	277	9	4.4742	gi|198458054|ref|XP_001360895.2|	62	2.00E-13	GA15703 [Drosophila pseudoobscura pseudoobscura] >gi|198136205|gb|EAL25470.2| GA15703 [Drosophila pseudoobscura pseudoobscura]	sp|Q24400|MLP2_DROME	55.1	3.00E-11	Muscle LIM protein Mlp84B OS=Drosophila melanogaster GN=Mlp84B PE=1 SV=1
Unigene11655_JingChaoZuZhi2	277	3	1.4914	--	--	--	--	--	--	--	--
Unigene11656_JingChaoZuZhi2	297	26	12.055	--	--	--	--	--	--	--	--
Unigene11657_JingChaoZuZhi2	332	72	29.8639	--	--	--	--	--	--	--	--
Unigene11658_JingChaoZuZhi2	712	83	16.0528	gi|255068805|emb|CBA11992.1|	49.3	7.00E-13	endonuclease-reverse transcriptase HmRTE-e01 [Heliconius melpomene]	--	--	--	--
Unigene11659_JingChaoZuZhi2	269	13	6.6549	gi|170051033|ref|XP_001861581.1|	93.2	2.00E-18	type II transmembrane protein [Culex quinquefasciatus] >gi|167872458|gb|EDS35841.1| type II transmembrane protein [Culex quinquefasciatus]	--	--	--	--
Unigene1165_JingChaoZuZhi2	572	61	14.6854	--	--	--	--	--	--	--	--
Unigene11660_JingChaoZuZhi2	369	25	9.3297	gi|115931431|ref|XP_001185218.1|	82.8	3.00E-15	PREDICTED: similar to Syne-1B [Strongylocentrotus purpuratus]	sp|P36044|MNN4_YEAST	75.1	1.00E-13	Protein MNN4 OS=Saccharomyces cerevisiae GN=MNN4 PE=2 SV=2
Unigene11661_JingChaoZuZhi2	469	35	10.2765	--	--	--	--	--	--	--	--
Unigene11662_JingChaoZuZhi2	367	30	11.2566	--	--	--	--	--	--	--	--
Unigene11663_JingChaoZuZhi2	509	69	18.6674	gi|23479124|gb|EAA16038.1|	55.5	8.00E-07	repeat organellar protein-related [Plasmodium yoelii yoelii]	--	--	--	--
Unigene11664_JingChaoZuZhi2	312	11	4.855	gi|110763439|ref|XP_623957.2|	169	3.00E-41	PREDICTED: similar to Dynein heavy chain at 93AB CG3723-PA [Apis mellifera]	sp|P39057|DYHC_ANTCR	157	2.00E-38	Dynein beta chain, ciliary OS=Anthocidaris crassispina PE=1 SV=1
Unigene11665_JingChaoZuZhi2	667	130	26.8392	gi|91080337|ref|XP_974622.1|	115	1.00E-24	PREDICTED: similar to mitochondrial ribosomal protein L53 CG30481-PA [Tribolium castaneum]	--	--	--	--
Unigene11666_JingChaoZuZhi2	505	59	16.0884	gi|66500767|ref|XP_396230.2|	124	1.00E-27	PREDICTED: similar to Sodium/potassium/calcium exchanger (Na(+)/K(+)/Ca(2+)-exchange protein) [Apis mellifera]	sp|Q9U6A0|NCKX_DROME	119	1.00E-26	Sodium/potassium/calcium exchanger Nckx30C OS=Drosophila melanogaster GN=Nckx30C PE=2 SV=3
Unigene11667_JingChaoZuZhi2	642	59	12.6552	--	--	--	--	--	--	--	--
Unigene11668_JingChaoZuZhi2	1309	145	15.2539	gi|119627579|gb|EAX07174.1|	156	2.00E-36	hCG1793893 [Homo sapiens]	sp|Q9T0K5|LRX3_ARATH	145	8.00E-34	Leucine-rich repeat extensin-like protein 3 OS=Arabidopsis thaliana GN=LRX3 PE=1 SV=1
Unigene11669_JingChaoZuZhi2	281	18	8.821	--	--	--	--	--	--	--	--
Unigene1166_JingChaoZuZhi2	713	145	28.0047	gi|195133001|ref|XP_002010928.1|	126	8.00E-28	GI21812 [Drosophila mojavensis] >gi|193907716|gb|EDW06583.1| GI21812 [Drosophila mojavensis]	sp|Q5RAS6|COPT1_PONAB	65.1	4.00E-10	High affinity copper uptake protein 1 OS=Pongo abelii GN=SLC31A1 PE=2 SV=1
Unigene11670_JingChaoZuZhi2	494	22	6.1326	gi|24580684|ref|NP_608540.1|	76.6	3.00E-13	CG2839 [Drosophila melanogaster] >gi|22945532|gb|AAF51469.2| CG2839 [Drosophila melanogaster]	sp|P36044|MNN4_YEAST	73.2	7.00E-13	Protein MNN4 OS=Saccharomyces cerevisiae GN=MNN4 PE=2 SV=2
Unigene11671_JingChaoZuZhi2	270	15	7.6503	--	--	--	--	--	--	--	--
Unigene11672_JingChaoZuZhi2	545	51	12.8862	--	--	--	--	--	--	--	--
Unigene11673_JingChaoZuZhi2	274	16	8.0412	gi|307179340|gb|EFN67704.1|	60.8	4.00E-17	Protein tyrosine phosphatase-like protein ptplad1 [Camponotus floridanus]	sp|Q5ZM57|HACD_CHICK	44.7	9.00E-07	3-hydroxyacyl-CoA dehydratase OS=Gallus gallus GN=PTPLAD1 PE=2 SV=1
Unigene11674_JingChaoZuZhi2	261	12	6.3313	--	--	--	--	--	--	--	--
Unigene11675_JingChaoZuZhi2	290	12	5.6982	gi|110763928|ref|XP_394944.3|	120	2.00E-26	PREDICTED: similar to CG3173-PA [Apis mellifera]	sp|Q6P4S8|INT1_MOUSE	110	3.00E-24	Integrator complex subunit 1 OS=Mus musculus GN=Ints1 PE=1 SV=2
Unigene11676_JingChaoZuZhi2	349	12	4.7349	gi|91079538|ref|XP_970846.1|	81.6	8.00E-15	PREDICTED: similar to ZK899.2 [Tribolium castaneum]	--	--	--	--
Unigene11677_JingChaoZuZhi2	321	43	18.4466	--	--	--	--	--	--	--	--
Unigene11678_JingChaoZuZhi2	334	23	9.4827	--	--	--	--	--	--	--	--
Unigene11679_JingChaoZuZhi2	2063	279	18.6233	gi|66549117|ref|XP_624252.1|	757	0	PREDICTED: similar to trithorax-related CG3848-PC, isoform C [Apis mellifera]	sp|Q8IRW8|TRR_DROME	673	0	Histone-lysine N-methyltransferase trr OS=Drosophila melanogaster GN=trr PE=1 SV=2
Unigene1167_JingChaoZuZhi2	875	192	30.2166	gi|307168272|gb|EFN61486.1|	219	2.00E-64	Cytochrome c oxidase subunit 5B, mitochondrial [Camponotus floridanus]	sp|P58301|RAD50_PYRFU	52	5.00E-06	DNA double-strand break repair rad50 ATPase OS=Pyrococcus furiosus GN=rad50 PE=1 SV=1
Unigene11680_JingChaoZuZhi2	262	9	4.7303	--	--	--	--	--	--	--	--
Unigene11681_JingChaoZuZhi2	421	44	14.392	gi|72123746|ref|XP_792349.1|	179	3.00E-44	PREDICTED: similar to lysosomal beta-galactosidase [Strongylocentrotus purpuratus] >gi|115934123|ref|XP_001179413.1| PREDICTED: similar to lysosomal beta-galactosidase [Strongylocentrotus purpuratus]	sp|P23780|BGAL_MOUSE	166	5.00E-41	Beta-galactosidase OS=Mus musculus GN=Glb1 PE=2 SV=1
Unigene11682_JingChaoZuZhi2	267	10	5.1575	--	--	--	--	--	--	--	--
Unigene11683_JingChaoZuZhi2	1878	252	18.4781	gi|291403734|ref|XP_002718186.1|	535	0	PREDICTED: serine/threonine-protein phosphatase 2A regulatory subunit B'' gamma subunit [Oryctolagus cuniculus]	sp|Q9JK24|P2R3C_MOUSE	535	0	Serine/threonine-protein phosphatase 2A regulatory subunit B'' subunit gamma OS=Mus musculus GN=Ppp2r3c PE=1 SV=2
Unigene11684_JingChaoZuZhi2	481	59	16.8911	gi|307171081|gb|EFN63124.1|	147	1.00E-34	Histone-lysine N-methyltransferase eggless [Camponotus floridanus]	sp|Q6INA9|SETB1_XENLA	130	3.00E-30	Histone-lysine N-methyltransferase SETDB1 OS=Xenopus laevis GN=setdb1 PE=2 SV=1
Unigene11685_JingChaoZuZhi2	577	51	12.1716	gi|91090400|ref|XP_970467.1|	99	2.00E-24	PREDICTED: similar to GA12051-PA [Tribolium castaneum]	sp|Q9VZE7|CTLH1_DROME	80.9	3.00E-20	CTL-like protein 1 OS=Drosophila melanogaster GN=CG1311 PE=2 SV=1
Unigene11686_JingChaoZuZhi2	273	42	21.1855	gi|74866928|sp|Q9U0M8.1|YPF06_PLAF7	59.7	3.00E-08	RecName: Full=Uncharacterized protein PFA0635c	sp|Q9U0M8|YPF06_PLAF7	59.7	5.00E-09	Uncharacterized protein PFA0635c OS=Plasmodium falciparum (isolate 3D7) GN=PFA0635c PE=4 SV=1
Unigene11687_JingChaoZuZhi2	484	55	15.6484	--	--	--	--	--	--	--	--
Unigene11688_JingChaoZuZhi2	326	24	10.1378	--	--	--	--	--	--	--	--
Unigene11689_JingChaoZuZhi2	292	43	20.2786	--	--	--	--	--	--	--	--
Unigene1168_JingChaoZuZhi2	193	12	8.562	gi|60602996|gb|AAX27955.1|	54.7	1.00E-06	unknown [Schistosoma japonicum]	--	--	--	--
Unigene11690_JingChaoZuZhi2	470	17	4.9808	gi|149045595|gb|EDL98595.1|	125	5.00E-28	origin recognition complex, subunit 3-like (S. cerevisiae), isoform CRA_b [Rattus norvegicus]	sp|Q4R180|ORC3_RAT	125	1.00E-28	Origin recognition complex subunit 3 OS=Rattus norvegicus GN=Orc3l PE=2 SV=1
Unigene11691_JingChaoZuZhi2	466	36	10.6382	--	--	--	--	--	--	--	--
Unigene11692_JingChaoZuZhi2	303	20	9.0895	gi|32812298|gb|AAP88020.1|AF355752_1	60.8	1.00E-08	reverse transcriptase [Chelonia mydas]	--	--	--	--
Unigene11693_JingChaoZuZhi2	921	82	12.2604	gi|157116658|ref|XP_001658598.1|	174	4.00E-42	phospholipid-transporting atpase 1 (aminophospholipid flippase 1) [Aedes aegypti] >gi|108876381|gb|EAT40606.1| phospholipid-transporting atpase 1 (aminophospholipid flippase 1) [Aedes aegypti]	sp|Q8K2X1|AT10D_MOUSE	123	2.00E-27	Probable phospholipid-transporting ATPase VD OS=Mus musculus GN=Atp10d PE=2 SV=2
Unigene11694_JingChaoZuZhi2	285	29	14.0122	--	--	--	--	--	--	--	--
Unigene11695_JingChaoZuZhi2	896	96	14.7542	--	--	--	--	--	--	--	--
Unigene11696_JingChaoZuZhi2	768	144	25.8198	--	--	--	--	--	--	--	--
Unigene11697_JingChaoZuZhi2	827	64	10.6568	gi|301624742|ref|XP_002941660.1|	58.2	4.00E-07	PREDICTED: uncharacterized aarF domain-containing protein kinase 2-like [Xenopus (Silurana) tropicalis]	sp|Q7Z695|ADCK2_HUMAN	55.5	4.00E-07	Uncharacterized aarF domain-containing protein kinase 2 OS=Homo sapiens GN=ADCK2 PE=2 SV=1
Unigene11698_JingChaoZuZhi2	1007	88	12.0339	--	--	--	--	--	--	--	--
Unigene11699_JingChaoZuZhi2	254	11	5.9636	gi|110759486|ref|XP_624668.2|	51.6	8.00E-06	PREDICTED: similar to CG11266-PB, isoform B [Apis mellifera]	--	--	--	--
Unigene1169_JingChaoZuZhi2	878	147	23.0555	--	--	--	--	--	--	--	--
Unigene116_JingChaoZuZhi2	497	65	18.0098	--	--	--	--	--	--	--	--
Unigene11700_JingChaoZuZhi2	1076	338	43.257	gi|115901733|ref|XP_796756.2|	198	3.00E-49	PREDICTED: similar to endonuclease-reverse transcriptase, partial [Strongylocentrotus purpuratus] >gi|115972774|ref|XP_001183353.1| PREDICTED: similar to endonuclease-reverse transcriptase, partial [Strongylocentrotus purpuratus]	sp|P08548|LIN1_NYCCO	142	3.00E-33	LINE-1 reverse transcriptase homolog OS=Nycticebus coucang PE=1 SV=1
Unigene11701_JingChaoZuZhi2	387	18	6.4049	--	--	--	--	--	--	--	--
Unigene11702_JingChaoZuZhi2	469	79	23.1956	gi|195472917|ref|XP_002088744.1|	189	4.00E-47	GE11176 [Drosophila yakuba] >gi|194174845|gb|EDW88456.1| GE11176 [Drosophila yakuba]	sp|Q9Y6Y8|S23IP_HUMAN	171	2.00E-42	SEC23-interacting protein OS=Homo sapiens GN=SEC23IP PE=1 SV=1
Unigene11703_JingChaoZuZhi2	439	33	10.3515	--	--	--	--	--	--	--	--
Unigene11704_JingChaoZuZhi2	639	193	41.5918	--	--	--	--	--	--	--	--
Unigene11705_JingChaoZuZhi2	275	11	5.5082	--	--	--	--	--	--	--	--
Unigene11706_JingChaoZuZhi2	318	12	5.1964	--	--	--	--	--	--	--	--
Unigene11707_JingChaoZuZhi2	333	16	6.6165	--	--	--	--	--	--	--	--
Unigene11708_JingChaoZuZhi2	287	16	7.677	--	--	--	--	--	--	--	--
Unigene11709_JingChaoZuZhi2	435	20	6.3313	gi|115896437|ref|XP_001198617.1|	134	7.00E-31	PREDICTED: similar to polyprotein [Strongylocentrotus purpuratus] >gi|115964481|ref|XP_001191867.1| PREDICTED: similar to polyprotein [Strongylocentrotus purpuratus]	--	--	--	--
Unigene1170_JingChaoZuZhi2	222	8	4.9624	--	--	--	--	--	--	--	--
Unigene11710_JingChaoZuZhi2	365	34	12.8274	--	--	--	--	--	--	--	--
Unigene11711_JingChaoZuZhi2	638	114	24.6057	gi|115713716|ref|XP_001184310.1|	194	2.00E-48	PREDICTED: similar to ATP-binding cassette transporter subfamily A [Strongylocentrotus purpuratus] >gi|115767844|ref|XP_790915.2| PREDICTED: similar to ATP-binding cassette transporter subfamily A [Strongylocentrotus purpuratus]	sp|Q8IZY2|ABCA7_HUMAN	192	1.00E-48	ATP-binding cassette sub-family A member 7 OS=Homo sapiens GN=ABCA7 PE=1 SV=3
Unigene11712_JingChaoZuZhi2	429	35	11.2347	gi|224016236|gb|ACN32395.1|	65.1	7.00E-10	Ubox5 [Callorhinchus milii]	sp|Q925F4|RNF37_MOUSE	56.6	5.00E-08	RING finger protein 37 OS=Mus musculus GN=Ubox5 PE=2 SV=2
Unigene11713_JingChaoZuZhi2	331	20	8.3206	--	--	--	--	--	--	--	--
Unigene11714_JingChaoZuZhi2	298	7	3.2347	--	--	--	--	--	--	--	--
Unigene11715_JingChaoZuZhi2	451	78	23.8161	gi|110757077|ref|XP_001120827.1|	129	5.00E-43	PREDICTED: similar to Karyopherin 3 CG1059-PA [Apis mellifera]	sp|Q8BKC5|IPO5_MOUSE	90.5	2.00E-30	Importin-5 OS=Mus musculus GN=Ipo5 PE=1 SV=3
Unigene11716_JingChaoZuZhi2	1846	385	28.7198	--	--	--	--	--	--	--	--
Unigene11717_JingChaoZuZhi2	846	81	13.1846	--	--	--	--	--	--	--	--
Unigene11718_JingChaoZuZhi2	2584	617	32.881	gi|115758090|ref|XP_001199119.1|	667	0	PREDICTED: similar to gag-pol polyprotein [Strongylocentrotus purpuratus] >gi|115951187|ref|XP_001177195.1| PREDICTED: similar to gag-pol polyprotein [Strongylocentrotus purpuratus]	sp|Q99315|YG31B_YEAST	219	1.00E-87	Transposon Ty3-G Gag-Pol polyprotein OS=Saccharomyces cerevisiae GN=TY3B-G PE=1 SV=3
Unigene11719_JingChaoZuZhi2	2832	380	18.4775	gi|301620693|ref|XP_002939702.1|	635	0	PREDICTED: LOW QUALITY PROTEIN: acetyl-CoA carboxylase-like [Xenopus (Silurana) tropicalis]	sp|Q28559|ACACA_SHEEP	627	0	Acetyl-CoA carboxylase 1 OS=Ovis aries GN=ACACA PE=2 SV=1
Unigene1171_JingChaoZuZhi2	1065	177	22.8863	--	--	--	--	--	--	--	--
Unigene11720_JingChaoZuZhi2	349	32	12.6263	gi|149408614|ref|XP_001507260.1|	165	5.00E-40	PREDICTED: similar to nuclear receptor subfamily 2, group F, member 1 [Ornithorhynchus anatinus]	sp|Q8TAM2|TTC8_HUMAN	157	2.00E-38	Tetratricopeptide repeat protein 8 OS=Homo sapiens GN=TTC8 PE=1 SV=2
Unigene11721_JingChaoZuZhi2	601	76	17.4137	gi|66512307|ref|XP_623368.1|	270	3.00E-71	PREDICTED: similar to CG32699-PA, partial [Apis mellifera]	sp|Q0KHU5|PCAT1_DROME	255	1.00E-67	1-acylglycerophosphocholine O-acyltransferase 1 OS=Drosophila melanogaster GN=CG32699 PE=2 SV=1
Unigene11722_JingChaoZuZhi2	258	35	18.681	--	--	--	--	--	--	--	--
Unigene11723_JingChaoZuZhi2	392	61	21.4287	gi|195126196|ref|XP_002007560.1|	65.5	6.00E-10	GI12317 [Drosophila mojavensis] >gi|193919169|gb|EDW18036.1| GI12317 [Drosophila mojavensis]	sp|Q92851|CASPA_HUMAN	58.2	2.00E-08	Caspase-10 OS=Homo sapiens GN=CASP10 PE=1 SV=3
Unigene11724_JingChaoZuZhi2	859	221	35.4283	gi|149066511|gb|EDM16384.1|	41.6	2.00E-08	hypothetical protein LOC500855, isoform CRA_b [Rattus norvegicus] >gi|149066512|gb|EDM16385.1| hypothetical protein LOC500855, isoform CRA_b [Rattus norvegicus]	--	--	--	--
Unigene11725_JingChaoZuZhi2	448	16	4.9181	gi|51988163|gb|AAA81094.2|	55.8	2.00E-13	Hypothetical protein C56E6.6 [Caenorhabditis elegans]	sp|Q6NUI6|CHADL_HUMAN	49.3	9.00E-10	Chondroadherin-like protein OS=Homo sapiens GN=CHADL PE=2 SV=2
Unigene11726_JingChaoZuZhi2	686	64	12.8472	gi|195428543|ref|XP_002062332.1|	322	5.00E-87	GK17483 [Drosophila willistoni] >gi|194158417|gb|EDW73318.1| GK17483 [Drosophila willistoni]	sp|P84309|ADCY5_MOUSE	288	3.00E-77	Adenylate cyclase type 5 OS=Mus musculus GN=Adcy5 PE=1 SV=2
Unigene11727_JingChaoZuZhi2	392	20	7.0258	--	--	--	--	--	--	--	--
Unigene11728_JingChaoZuZhi2	400	76	26.1641	--	--	--	--	--	--	--	--
Unigene11729_JingChaoZuZhi2	358	6	2.3079	gi|307173059|gb|EFN64189.1|	58.5	7.00E-08	Zinc finger protein ush [Camponotus floridanus]	sp|Q92794|MYST3_HUMAN	49.3	7.00E-06	Histone acetyltransferase MYST3 OS=Homo sapiens GN=MYST3 PE=1 SV=2
Unigene1172_JingChaoZuZhi2	423	77	25.067	--	--	--	--	--	--	--	--
Unigene11730_JingChaoZuZhi2	425	24	7.7763	gi|170043178|ref|XP_001849275.1|	80.1	2.00E-14	ATP synthase alpha subunit vacuolar [Culex quinquefasciatus] >gi|167866589|gb|EDS29972.1| ATP synthase alpha subunit vacuolar [Culex quinquefasciatus]	sp|Q9XW92|VATA_CAEEL	78.6	1.00E-14	V-type proton ATPase catalytic subunit A OS=Caenorhabditis elegans GN=vha-13 PE=1 SV=3
Unigene11731_JingChaoZuZhi2	257	23	12.3239	--	--	--	--	--	--	--	--
Unigene11732_JingChaoZuZhi2	456	36	10.8715	gi|170579958|ref|XP_001895056.1|	82.8	3.00E-15	Histidine-rich glycoprotein precursor [Brugia malayi]	sp|Q8MP30|Y7791_DICDI	56.6	6.00E-08	Uncharacterized histidine-rich protein DDB_G0274557 OS=Dictyostelium discoideum GN=DDB_G0274557 PE=4 SV=1
Unigene11733_JingChaoZuZhi2	251	26	14.2643	--	--	--	--	--	--	--	--
Unigene11734_JingChaoZuZhi2	309	41	18.2716	--	--	--	--	--	--	--	--
Unigene11735_JingChaoZuZhi2	358	48	18.4633	--	--	--	--	--	--	--	--
Unigene11736_JingChaoZuZhi2	420	38	12.4591	gi|195484900|ref|XP_002090868.1|	107	1.00E-22	GE12561 [Drosophila yakuba] >gi|194176969|gb|EDW90580.1| GE12561 [Drosophila yakuba]	sp|Q9V7U0|RESIL_DROME	78.2	1.00E-14	Pro-resilin OS=Drosophila melanogaster GN=resilin PE=1 SV=1
Unigene11737_JingChaoZuZhi2	563	133	32.5308	--	--	--	--	--	--	--	--
Unigene11738_JingChaoZuZhi2	484	98	27.8825	gi|118344440|ref|NP_001072041.1|	66.6	3.00E-10	zinc finger protein [Ciona intestinalis] >gi|92081484|dbj|BAE93289.1| zinc finger protein [Ciona intestinalis]	sp|Q01611|ZFY1_XENLA	65.5	1.00E-10	Zinc finger Y-chromosomal protein 1 OS=Xenopus laevis GN=zfy1 PE=2 SV=1
Unigene11739_JingChaoZuZhi2	1711	277	22.2937	--	--	--	--	--	--	--	--
Unigene1173_JingChaoZuZhi2	297	30	13.9097	gi|268573194|ref|XP_002641574.1|	47.4	1.00E-10	Hypothetical protein CBG09875 [Caenorhabditis briggsae]	sp|Q8IZL8|PELP1_HUMAN	48.9	1.00E-09	Proline-, glutamic acid- and leucine-rich protein 1 OS=Homo sapiens GN=PELP1 PE=1 SV=2
Unigene11740_JingChaoZuZhi2	278	26	12.8789	--	--	--	--	--	--	--	--
Unigene11741_JingChaoZuZhi2	324	46	19.5508	--	--	--	--	--	--	--	--
Unigene11742_JingChaoZuZhi2	671	34	6.9776	gi|195379394|ref|XP_002048464.1|	60.5	5.00E-10	GJ13984 [Drosophila virilis] >gi|194155622|gb|EDW70806.1| GJ13984 [Drosophila virilis]	--	--	--	--
Unigene11743_JingChaoZuZhi2	478	30	8.6426	gi|195174293|ref|XP_002027913.1|	54.7	1.00E-06	GL27064 [Drosophila persimilis] >gi|194115602|gb|EDW37645.1| GL27064 [Drosophila persimilis]	sp|Q9LK03|PERK2_ARATH	50.1	6.00E-06	Proline-rich receptor-like protein kinase PERK2 OS=Arabidopsis thaliana GN=PERK2 PE=2 SV=2
Unigene11744_JingChaoZuZhi2	488	103	29.0649	gi|123530|sp|P04929.1|HRPX_PLALO	40.4	2.00E-06	RecName: Full=Histidine-rich glycoprotein; Flags: Precursor >gi|9999|emb|CAA25698.1| histidine-rich protein [Plasmodium lophurae] >gi|224316|prf||1101401A protein,His rich	sp|P04929|HRPX_PLALO	40.4	5.00E-07	Histidine-rich glycoprotein OS=Plasmodium lophurae PE=4 SV=1
Unigene11745_JingChaoZuZhi2	1222	188	21.1855	gi|157109996|ref|XP_001650911.1|	308	3.00E-82	protein kinase c alpha binding protein [Aedes aegypti] >gi|108878848|gb|EAT43073.1| protein kinase c alpha binding protein [Aedes aegypti]	sp|Q62083|PICK1_MOUSE	290	1.00E-77	PRKCA-binding protein OS=Mus musculus GN=Pick1 PE=1 SV=1
Unigene11746_JingChaoZuZhi2	427	27	8.7074	gi|189238664|ref|XP_001812136.1|	55.1	7.00E-07	PREDICTED: similar to abc transporter [Tribolium castaneum]	--	--	--	--
Unigene11747_JingChaoZuZhi2	1093	160	20.1582	gi|55742776|ref|NP_001006952.1|	67.8	7.00E-10	collagen alpha-1(II) chain [Canis lupus familiaris] >gi|10947027|gb|AAC62178.2| type IIA procollagen [Canis lupus familiaris]	sp|P05539|CO2A1_RAT	65.1	9.00E-10	Collagen alpha-1(II) chain OS=Rattus norvegicus GN=Col2a1 PE=2 SV=2
Unigene11748_JingChaoZuZhi2	383	54	19.4154	gi|158297551|ref|XP_317773.4|	142	5.00E-33	AGAP007749-PA [Anopheles gambiae str. PEST] >gi|157015250|gb|EAA12378.4| AGAP007749-PA [Anopheles gambiae str. PEST]	sp|Q5R8I6|TBC23_PONAB	128	1.00E-29	TBC1 domain family member 23 OS=Pongo abelii GN=TBC1D23 PE=2 SV=1
Unigene11749_JingChaoZuZhi2	507	44	11.9508	--	--	--	--	--	--	--	--
Unigene1174_JingChaoZuZhi2	559	132	32.5173	--	--	--	--	--	--	--	--
Unigene11750_JingChaoZuZhi2	571	64	15.4346	gi|167535147|ref|XP_001749248.1|	53.9	3.00E-06	hypothetical protein [Monosiga brevicollis MX1] >gi|163772401|gb|EDQ86054.1| predicted protein [Monosiga brevicollis MX1]	--	--	--	--
Unigene11751_JingChaoZuZhi2	331	22	9.1526	--	--	--	--	--	--	--	--
Unigene11752_JingChaoZuZhi2	313	11	4.8395	--	--	--	--	--	--	--	--
Unigene11753_JingChaoZuZhi2	553	123	30.6289	--	--	--	--	--	--	--	--
Unigene11754_JingChaoZuZhi2	290	20	9.4969	--	--	--	--	--	--	--	--
Unigene11755_JingChaoZuZhi2	1132	231	28.1007	gi|189242016|ref|XP_001807518.1|	170	8.00E-41	PREDICTED: similar to Zinc carboxypeptidase family protein [Tribolium castaneum]	sp|Q9JHW1|CBPD_RAT	118	9.00E-26	Carboxypeptidase D OS=Rattus norvegicus GN=Cpd PE=2 SV=2
Unigene11756_JingChaoZuZhi2	1154	293	34.9634	--	--	--	--	--	--	--	--
Unigene11757_JingChaoZuZhi2	1945	445	31.5059	gi|148700064|gb|EDL32011.1|	64.7	1.00E-08	mCG148088 [Mus musculus]	sp|B2RY56|RBM25_MOUSE	59.7	7.00E-08	RNA-binding protein 25 OS=Mus musculus GN=Rbm25 PE=1 SV=1
Unigene11758_JingChaoZuZhi2	316	34	14.8164	gi|3874243|emb|CAA94113.1|	55.8	4.00E-07	C. elegans protein C11G6.3, partially confirmed by transcript evidence [Caenorhabditis elegans]	sp|Q5T200|ZC3HD_HUMAN	50.4	3.00E-06	Zinc finger CCCH domain-containing protein 13 OS=Homo sapiens GN=ZC3H13 PE=1 SV=1
Unigene11759_JingChaoZuZhi2	437	77	24.2639	gi|78190492|ref|NP_001030025.1|	74.7	9.00E-13	X-linked retinitis pigmentosa GTPase regulator isoform C [Homo sapiens]	sp|P82970|HMGN5_HUMAN	54.7	2.00E-07	High mobility group nucleosome-binding domain-containing protein 5 OS=Homo sapiens GN=HMGN5 PE=1 SV=1
Unigene1175_JingChaoZuZhi2	244	24	13.5448	--	--	--	--	--	--	--	--
Unigene11760_JingChaoZuZhi2	1185	274	31.8408	--	--	--	--	--	--	--	--
Unigene11761_JingChaoZuZhi2	685	88	17.6907	gi|224054676|ref|XP_002190173.1|	147	2.00E-34	PREDICTED: cytoplasmic linker associated protein 1 [Taeniopygia guttata]	sp|A1A5K2|CLA1B_XENLA	144	5.00E-34	CLIP-associating protein 1-B OS=Xenopus laevis GN=clasp1b PE=1 SV=1
Unigene11762_JingChaoZuZhi2	267	14	7.2205	gi|37361880|gb|AAQ91053.1|	79	5.00E-14	LRRGT00097 [Rattus norvegicus]	sp|P36044|MNN4_YEAST	65.5	1.00E-10	Protein MNN4 OS=Saccharomyces cerevisiae GN=MNN4 PE=2 SV=2
Unigene11763_JingChaoZuZhi2	299	21	9.6716	gi|193624682|ref|XP_001943160.1|	57.4	2.00E-07	PREDICTED: similar to cirhin [Acyrthosiphon pisum]	--	--	--	--
Unigene11764_JingChaoZuZhi2	301	52	23.7897	--	--	--	--	--	--	--	--
Unigene11765_JingChaoZuZhi2	492	184	51.4997	gi|6576738|dbj|BAA88337.1|	62.4	6.00E-09	ORF2 [Platemys spixii]	--	--	--	--
Unigene11766_JingChaoZuZhi2	337	23	9.3983	gi|119631974|gb|EAX11569.1|	54.3	1.00E-06	hCG1647962, isoform CRA_b [Homo sapiens]	sp|Q28181|CNGB1_BOVIN	50.4	3.00E-06	Cyclic nucleotide-gated cation channel beta-1 OS=Bos taurus GN=CNGB1 PE=1 SV=1
Unigene11767_JingChaoZuZhi2	842	92	15.0462	gi|195151015|ref|XP_002016445.1|	89.7	1.00E-16	GL10489 [Drosophila persimilis] >gi|194110292|gb|EDW32335.1| GL10489 [Drosophila persimilis]	sp|Q8C5W3|TBCEL_MOUSE	64.3	1.00E-09	Tubulin-specific chaperone cofactor E-like protein OS=Mus musculus GN=Tbcel PE=1 SV=1
Unigene11768_JingChaoZuZhi2	584	32	7.5455	gi|158289294|ref|XP_311043.4|	148	1.00E-34	AGAP000107-PA [Anopheles gambiae str. PEST] >gi|157018985|gb|EAA06365.4| AGAP000107-PA [Anopheles gambiae str. PEST]	sp|Q9W0T5|PYX_DROME	142	1.00E-33	Transient receptor potential channel pyrexia OS=Drosophila melanogaster GN=pyx PE=2 SV=2
Unigene11769_JingChaoZuZhi2	306	11	4.9502	--	--	--	--	--	--	--	--
Unigene1176_JingChaoZuZhi2	405	47	15.9807	gi|293341511|ref|XP_002742482.1|	51.6	8.00E-06	PREDICTED: hypothetical protein LOC100362272 [Rattus norvegicus]	--	--	--	--
Unigene11770_JingChaoZuZhi2	357	63	24.301	--	--	--	--	--	--	--	--
Unigene11771_JingChaoZuZhi2	457	46	13.861	--	--	--	--	--	--	--	--
Unigene11772_JingChaoZuZhi2	295	14	6.5352	gi|308210740|dbj|BAJ22675.1|	110	2.00E-23	arrestin [Hasarius adansoni]	sp|P51484|ARRH_LIMPO	103	3.00E-22	Arrestin, lateral eye OS=Limulus polyphemus PE=2 SV=1
Unigene11773_JingChaoZuZhi2	617	110	24.5504	gi|197276652|ref|NP_001127843.1|	60.1	5.00E-08	nicotinamide riboside kinase [Apis mellifera]	sp|Q0S219|IF2_RHOSR	63.9	7.00E-10	Translation initiation factor IF-2 OS=Rhodococcus sp. (strain RHA1) GN=infB PE=3 SV=1
Unigene11774_JingChaoZuZhi2	299	12	5.5266	--	--	--	--	--	--	--	--
Unigene11775_JingChaoZuZhi2	475	20	5.7981	gi|145522999|ref|XP_001447338.1|	57.8	1.00E-07	hypothetical protein [Paramecium tetraurelia strain d4-2] >gi|124414849|emb|CAK79941.1| unnamed protein product [Paramecium tetraurelia]	--	--	--	--
Unigene11776_JingChaoZuZhi2	1327	279	28.9524	--	--	--	--	--	--	--	--
Unigene11777_JingChaoZuZhi2	431	51	16.2946	--	--	--	--	--	--	--	--
Unigene11778_JingChaoZuZhi2	290	12	5.6982	--	--	--	--	--	--	--	--
Unigene11779_JingChaoZuZhi2	416	21	6.9515	--	--	--	--	--	--	--	--
Unigene1177_JingChaoZuZhi2	998	149	20.5593	--	--	--	--	--	--	--	--
Unigene11780_JingChaoZuZhi2	429	21	6.7408	--	--	--	--	--	--	--	--
Unigene11781_JingChaoZuZhi2	507	63	17.1114	gi|157888618|emb|CAP09599.1|	184	1.00E-45	novel GA binding protein transcription factor [Danio rerio]	sp|Q8TAK5|GABP2_HUMAN	175	1.00E-43	GA-binding protein subunit beta-2 OS=Homo sapiens GN=GABPB2 PE=2 SV=1
Unigene11782_JingChaoZuZhi2	373	14	5.1686	--	--	--	--	--	--	--	--
Unigene11783_JingChaoZuZhi2	569	36	8.7125	--	--	--	--	--	--	--	--
Unigene11784_JingChaoZuZhi2	372	22	8.1439	gi|270001858|gb|EEZ98305.1|	52	6.00E-06	hypothetical protein TcasGA2_TC000758 [Tribolium castaneum]	--	--	--	--
Unigene11785_JingChaoZuZhi2	359	125	47.9477	--	--	--	--	--	--	--	--
Unigene11786_JingChaoZuZhi2	1450	248	23.5524	--	--	--	--	--	--	--	--
Unigene11787_JingChaoZuZhi2	305	12	5.4179	--	--	--	--	--	--	--	--
Unigene11788_JingChaoZuZhi2	277	16	7.9541	gi|7549210|gb|AAF63787.1|AF142406_1	55.5	6.00E-07	200 kDa antigen p200 [Babesia bigemina]	sp|P79114|MYO10_BOVIN	52.8	7.00E-07	Myosin-X OS=Bos taurus GN=MYO10 PE=2 SV=1
Unigene11789_JingChaoZuZhi2	324	18	7.6503	gi|118123205|ref|XP_428577.2|	72.8	2.00E-16	PREDICTED: similar to Single-strand selective monofunctional uracil DNA glycosylase, partial [Gallus gallus]	sp|Q811Q1|SMUG1_RAT	70.5	5.00E-16	Single-strand selective monofunctional uracil-DNA glycosylase OS=Rattus norvegicus GN=Smug1 PE=2 SV=1
Unigene1178_JingChaoZuZhi2	745	189	34.9347	--	--	--	--	--	--	--	--
Unigene11790_JingChaoZuZhi2	646	55	11.7242	--	--	--	--	--	--	--	--
Unigene11791_JingChaoZuZhi2	322	25	10.6914	--	--	--	--	--	--	--	--
Unigene11792_JingChaoZuZhi2	476	57	16.49	--	--	--	--	--	--	--	--
Unigene11793_JingChaoZuZhi2	519	26	6.8985	gi|91081291|ref|XP_968441.1|	67.8	7.00E-26	PREDICTED: similar to Ets at 98B CG5583-PA [Tribolium castaneum]	sp|P29775|ETS4_DROME	67.4	6.00E-23	DNA-binding protein D-ETS-4 OS=Drosophila melanogaster GN=Ets98B PE=2 SV=3
Unigene11794_JingChaoZuZhi2	765	90	16.2007	--	--	--	--	--	--	--	--
Unigene11795_JingChaoZuZhi2	353	31	12.0931	--	--	--	--	--	--	--	--
Unigene11796_JingChaoZuZhi2	302	38	17.3272	--	--	--	--	--	--	--	--
Unigene11797_JingChaoZuZhi2	416	62	20.5234	--	--	--	--	--	--	--	--
Unigene11798_JingChaoZuZhi2	527	17	4.4421	gi|198437441|ref|XP_002130748.1|	127	1.00E-28	PREDICTED: similar to Sp17 protein [Ciona intestinalis]	sp|Q9Y493|ZAN_HUMAN	85.5	2.00E-16	Zonadhesin OS=Homo sapiens GN=ZAN PE=2 SV=3
Unigene11799_JingChaoZuZhi2	1306	275	28.9962	--	--	--	--	--	--	--	--
Unigene1179_JingChaoZuZhi2	803	127	21.7791	--	--	--	--	--	--	--	--
Unigene117_JingChaoZuZhi2	1011	242	32.9622	gi|170595123|ref|XP_001902255.1|	140	6.00E-32	U88 [Brugia malayi]	sp|Q54UG3|Y1095_DICDI	107	1.00E-22	UPF0746 protein DDB_G0281095 OS=Dictyostelium discoideum GN=DDB_G0281095 PE=3 SV=1
[truncated: 94,312 more rows]
