# Supplementary material for: Transcriptome Profiling of Testis during Sexual Maturation Stages in Eriocheir sinensis Using Illumina Sequencing
Source: PLoS One. 2012 Mar 19;7(3):e33735. doi: 10.1371/journal.pone.0033735 (PMC3307765; doi:10.1371/journal.pone.0033735)
Supplement: Table S2 — GOs of growth and reproduction related genes. (XLS) [file pone.0033735.s002.xls]

## Sheet: Sheet1
	Gene ID	GOs Numbers	Gos
Reproduction related genes	Unigene10	14	GO:0016477	GO:0017111	GO:0033205	GO:0002164	GO:0007010	GO:0022403	GO:0015629	GO:0044444	GO:0006897	GO:0032506	GO:0005198	GO:0032559	GO:0048806	GO:0009790
	Unigene10189	10	GO:0007411	GO:0005515	GO:0016337	GO:0007389	GO:0016021	GO:0007154	GO:0003824	GO:0042051	GO:0030516	GO:0031345
	Unigene10202	10	GO:0044248	GO:0043231	GO:0010468	GO:0007292	GO:0050793	GO:0001071	GO:0003677	GO:0006351	GO:0048102	GO:0003702
	Unigene10277	6	GO:0005488	GO:0043231	GO:0022008	GO:0003006	GO:0048477	GO:0000904
	Unigene10383	7	GO:0007411	GO:0016628	GO:0042051	GO:0048489	GO:0030516	GO:0008152	GO:0007154
	Unigene10395	7	GO:0009987	GO:0051179	GO:0005488	GO:0005681	GO:0007562	GO:0048511	GO:0048477
	Unigene10532	28	GO:0030529	GO:0004674	GO:0006915	GO:0014874	GO:0007346	GO:0008284	GO:0043434	GO:0003006	GO:0019932	GO:0007243	GO:0022402	GO:0031667	GO:0007613	GO:0006464	GO:0031960	GO:0031966	GO:0048631	GO:0032559	GO:0044459	GO:0043200	GO:0006446	GO:0006941	GO:0002237	GO:0014891	GO:0009746	GO:0014909	GO:0006950	GO:0005624
	Unigene1056	5	GO:0040009	GO:0046872	GO:0018988	GO:0004866	GO:0002164
	Unigene10576	4	GO:0060811	GO:0007314	GO:0044424	GO:0071842
	Unigene10610	11	GO:0032561	GO:0005515	GO:0017111	GO:0016020	GO:0051641	GO:0043409	GO:0007297	GO:0071842	GO:0001700	GO:0005622	GO:0006952
	Unigene10745	6	GO:0046669	GO:0010212	GO:0004175	GO:0007435	GO:0051605	GO:0003006
	Unigene10910	29	GO:0001501	GO:0005026	GO:0007369	GO:0032768	GO:0040007	GO:0007320	GO:0034711	GO:0008283	GO:0042476	GO:0010468	GO:0016021	GO:0008406	GO:0009855	GO:0044424	GO:0045639	GO:0003002	GO:0030282	GO:0001932	GO:0032559	GO:0043169	GO:0043234	GO:0030323	GO:0045860	GO:0030072	GO:0048232	GO:0009746	GO:0032403	GO:0032924	GO:0030509
	Unigene10926	16	GO:0046914	GO:0044448	GO:0010004	GO:0048729	GO:0030832	GO:0004713	GO:0005924	GO:0006468	GO:0001700	GO:0032559	GO:0008104	GO:0006935	GO:0010608	GO:0019898	GO:0008582	GO:0007300
	Unigene10986	31	GO:0006298	GO:0030098	GO:0006091	GO:0051095	GO:0008406	GO:0032404	GO:0043009	GO:0046872	GO:0010259	GO:0032356	GO:0032300	GO:0019900	GO:0032139	GO:0002566	GO:0043231	GO:0032559	GO:0009411	GO:0008630	GO:0032138	GO:0010212	GO:0042623	GO:0000077	GO:0043066	GO:0042802	GO:0042221	GO:0010520	GO:0002204	GO:0005694	GO:0043565	GO:0000217	GO:0051276
	Unigene11000	35	GO:0004869	GO:0045767	GO:0031016	GO:0048732	GO:0004714	GO:0019932	GO:0007169	GO:0005102	GO:0017046	GO:0007163	GO:0019900	GO:0042598	GO:0016477	GO:0044459	GO:0042995	GO:0035239	GO:0016021	GO:0010740	GO:0007276	GO:0000910	GO:0043010	GO:0002376	GO:0006275	GO:0048667	GO:0005520	GO:0010741	GO:0021515	GO:0008283	GO:0033273	GO:0051259	GO:0000165	GO:0010604	GO:0030030	GO:0006468	GO:0009887
	Unigene11194	15	GO:0030427	GO:0005818	GO:0007267	GO:0070161	GO:0001558	GO:0016198	GO:0007420	GO:0008587	GO:0035148	GO:0035146	GO:0001709	GO:0007019	GO:0015631	GO:0060541	GO:0044444
	Unigene1135	20	GO:0004175	GO:0046914	GO:0017046	GO:0043171	GO:0017111	GO:0060089	GO:0030162	GO:0003006	GO:0000267	GO:0042165	GO:0009100	GO:0009207	GO:0023060	GO:0042802	GO:0032559	GO:0000502	GO:0030163	GO:0044439	GO:0051260	GO:0044421
	Unigene12564	4	GO:0009987	GO:0005488	GO:0019866	GO:0048232
	Unigene12577	32	GO:0031090	GO:0032868	GO:2000026	GO:0001932	GO:0004714	GO:0010828	GO:0007169	GO:0032147	GO:0005102	GO:0017046	GO:0005979	GO:0019900	GO:0042598	GO:0031328	GO:0016477	GO:0032561	GO:0032559	GO:0045927	GO:0019048	GO:0051262	GO:0005887	GO:0033500	GO:0010740	GO:0019904	GO:0006275	GO:0007088	GO:0005520	GO:0008283	GO:0000165	GO:0006110	GO:0009887	GO:0006355
	Unigene12632	3	GO:0008233	GO:0005488	GO:0007338
	Unigene12633	14	GO:0000278	GO:0005515	GO:0005815	GO:0065008	GO:0001752	GO:0044267	GO:0007169	GO:0030036	GO:0042749	GO:0032559	GO:0022402	GO:0006950	GO:0016887	GO:0007316
	Unigene12648	4	GO:0019941	GO:0048232	GO:0003824	GO:0000166
	Unigene12678	7	GO:0009653	GO:0003006	GO:0048513	GO:0030154	GO:0050794	GO:0048477	GO:0005488
	Unigene12729	11	GO:0007411	GO:0004871	GO:0005515	GO:0016337	GO:0007389	GO:0016021	GO:0007154	GO:0046872	GO:0042051	GO:0030516	GO:0031345
	Unigene12732	15	GO:0030427	GO:0005818	GO:0007267	GO:0070161	GO:0001558	GO:0016198	GO:0007420	GO:0008587	GO:0035148	GO:0035146	GO:0001709	GO:0007019	GO:0015631	GO:0060541	GO:0044444
	Unigene12798	6	GO:0043231	GO:0042393	GO:0016458	GO:0046914	GO:0007292	GO:0007444
	Unigene12813	23	GO:0046888	GO:0060123	GO:0032991	GO:0051427	GO:0004725	GO:0043231	GO:0033500	GO:0032432	GO:0005626	GO:0006639	GO:0006796	GO:0050796	GO:0007169	GO:0033157	GO:0048667	GO:0006464	GO:0035264	GO:0044459	GO:0019899	GO:0044444	GO:0022414	GO:0031570	GO:0000165
	Unigene12823	32	GO:0000323	GO:0044446	GO:0009057	GO:0001935	GO:0031090	GO:0004672	GO:0005978	GO:0043005	GO:0043434	GO:0003006	GO:0032094	GO:0043234	GO:0012505	GO:0032559	GO:0001934	GO:0009758	GO:0040007	GO:0043549	GO:0010740	GO:0010591	GO:0010507	GO:0005739	GO:0005515	GO:0008361	GO:0001101	GO:0000267	GO:0032233	GO:0030041	GO:0006412	GO:0032319	GO:0006635	GO:0044297
	Unigene12843	9	GO:0007293	GO:0031519	GO:0016458	GO:0031981	GO:0007423	GO:0046872	GO:0007059	GO:0007399	GO:0000904
	Unigene1286	7	GO:0005488	GO:0016049	GO:0031519	GO:0007049	GO:0016790	GO:0019783	GO:0035521
	Unigene12895	10	GO:0032583	GO:0042221	GO:0016787	GO:0031461	GO:0006915	GO:0016049	GO:0005488	GO:0000086	GO:0010466	GO:0016564
	Unigene13028	14	GO:0032561	GO:0000819	GO:0005815	GO:0043231	GO:0007052	GO:0008608	GO:0007088	GO:0000775	GO:0007308	GO:0045171	GO:0006935	GO:0015631	GO:0000922	GO:0007293
	Unigene13152	6	GO:0005488	GO:0043231	GO:0043234	GO:0006357	GO:0006325	GO:0003006
	Unigene13210	9	GO:0005488	GO:0044260	GO:0090304	GO:0031047	GO:0042221	GO:0007588	GO:0040009	GO:0007610	GO:0044424
	Unigene13420	4	GO:0006810	GO:0060180	GO:0007600	GO:0009266
	Unigene13509	17	GO:0007417	GO:0065008	GO:0007052	GO:0006959	GO:0048534	GO:0007297	GO:0007169	GO:0030036	GO:0031224	GO:0030030	GO:0032559	GO:0006464	GO:0004714	GO:0033554	GO:0007431	GO:0002682	GO:0048598
	Unigene13523	16	GO:0021536	GO:0006357	GO:0043231	GO:0003712	GO:0016575	GO:0009968	GO:0001071	GO:0042974	GO:0043565	GO:0043367	GO:0030218	GO:0044446	GO:0035264	GO:0055092	GO:0007623	GO:0030234
	Unigene13530	7	GO:0007411	GO:0043231	GO:0007297	GO:0046914	GO:0048513	GO:0007033	GO:0006914
	Unigene13921	6	GO:0009987	GO:0035097	GO:0003712	GO:0010468	GO:0006461	GO:0019042
	Unigene1393	10	GO:0070011	GO:0007338	GO:0001669	GO:0032991	GO:0016811	GO:0006464	GO:0044281	GO:0048029	GO:0019219	GO:0031326
	Unigene13972	7	GO:0000212	GO:0048610	GO:0010259	GO:0007283	GO:0016301	GO:0032506	GO:0033206
	Unigene15029	8	GO:0008092	GO:0007293	GO:0005856	GO:0005913	GO:0007010	GO:0050839	GO:0016323	GO:0019897
	Unigene15124	10	GO:0008038	GO:0048675	GO:0043005	GO:0044297	GO:0007420	GO:0006935	GO:0042802	GO:0006897	GO:0043498	GO:0004888
	Unigene15236	2	GO:0007292	GO:0016023
	Unigene15476	11	GO:0009653	GO:0007178	GO:0007444	GO:0004675	GO:0003006	GO:0048468	GO:0007154	GO:0003002	GO:0048477	GO:0048523	GO:0048610
	Unigene1561	2	GO:0040009	GO:0005488
	Unigene15639	4	GO:0005488	GO:0016049	GO:0008168	GO:0032991
	Unigene15648	40	GO:0001894	GO:0045986	GO:0016209	GO:0006281	GO:0045104	GO:0032991	GO:0044093	GO:0003824	GO:0031982	GO:0022011	GO:0050954	GO:0048232	GO:0035264	GO:0000737	GO:0060122	GO:0043231	GO:0010033	GO:0007568	GO:0006801	GO:0042743	GO:0043549	GO:0043066	GO:0006790	GO:0003015	GO:0002376	GO:0030005	GO:0030425	GO:0019903	GO:0008585	GO:0046914	GO:0008015	GO:0010894	GO:0044444	GO:0007610	GO:0000305	GO:0009611	GO:0044297	GO:0016020	GO:0044421	GO:0001816
	Unigene15681	30	GO:0046914	GO:0009611	GO:0000737	GO:0005515	GO:0043231	GO:0010033	GO:0008015	GO:0022011	GO:0042743	GO:0008585	GO:0045104	GO:0007610	GO:0050954	GO:0060122	GO:0006790	GO:0016209	GO:0048232	GO:0002376	GO:0030005	GO:0006801	GO:0000305	GO:0044421	GO:0003824	GO:0035264	GO:0044444	GO:0003015	GO:0043066	GO:0045986	GO:0006281	GO:0001894
	Unigene15692	6	GO:0033057	GO:0044459	GO:0043050	GO:0005216	GO:0042044	GO:0048806
	Unigene1585	11	GO:0031023	GO:0005488	GO:0007293	GO:0048134	GO:0007015	GO:0043232	GO:0007283	GO:0007051	GO:0044444	GO:0035324	GO:0016020
	Unigene15972	1	GO:0003006
	Unigene16010	10	GO:0007472	GO:0015630	GO:0009108	GO:0000087	GO:0007292	GO:0051301	GO:0016301	GO:0055088	GO:0016020	GO:0032559
	Unigene16028	16	GO:0000278	GO:0044448	GO:0032991	GO:0010004	GO:0007043	GO:0005913	GO:0045165	GO:0016337	GO:0051301	GO:0005543	GO:0007297	GO:0008105	GO:0002009	GO:0035088	GO:0007309	GO:0007399
	Unigene16149	10	GO:0007043	GO:0007164	GO:0046914	GO:0030136	GO:0035264	GO:0030036	GO:0008361	GO:0051234	GO:0002009	GO:0001703
	Unigene16339	4	GO:0050877	GO:0007224	GO:0040009	GO:0023060
	Unigene1635	7	GO:0005488	GO:0005681	GO:0000377	GO:0045069	GO:0006397	GO:0034518	GO:0016246
	Unigene16386	6	GO:0048667	GO:0007297	GO:0048812	GO:0048513	GO:0007033	GO:0006914
	Unigene16420	10	GO:0016192	GO:0048675	GO:0035556	GO:0043231	GO:0004672	GO:0044297	GO:0032561	GO:0008104	GO:0032559	GO:0006464
	Unigene16426	29	GO:0006810	GO:0014020	GO:0005929	GO:0034613	GO:0032401	GO:0030092	GO:0031253	GO:0009855	GO:0031175	GO:0050890	GO:0021543	GO:0007610	GO:0031023	GO:0003143	GO:0042462	GO:0005813	GO:0006629	GO:0003774	GO:0043234	GO:0042384	GO:0007281	GO:0015631	GO:0060295	GO:0043954	GO:0021544	GO:0007606	GO:0000910	GO:0034453	GO:0001894
	Unigene16512	8	GO:0006357	GO:0043231	GO:0040007	GO:0007128	GO:0007281	GO:0007129	GO:0034968	GO:0005488
	Unigene16572	6	GO:0005681	GO:0003676	GO:0007049	GO:0000380	GO:0000245	GO:0007281
	Unigene1660	16	GO:0005856	GO:0005838	GO:0016049	GO:0043248	GO:0042994	GO:0043433	GO:0043231	GO:0005515	GO:0000122	GO:0043161	GO:0009968	GO:0001836	GO:0031331	GO:0051439	GO:0000165	GO:0000079
	Unigene16610	6	GO:0000288	GO:0007292	GO:0005488	GO:0005667	GO:0004518	GO:0006396
	Unigene16679	13	GO:0044248	GO:0048545	GO:0009897	GO:0000323	GO:0035036	GO:0009628	GO:0031667	GO:0046872	GO:0005624	GO:0008484	GO:0007399	GO:0030141	GO:0044421
	Unigene16685	10	GO:0008038	GO:0048675	GO:0043005	GO:0044297	GO:0007420	GO:0006935	GO:0042802	GO:0006897	GO:0043498	GO:0004888
	Unigene16785	4	GO:0014821	GO:0007610	GO:0048232	GO:0043231
	Unigene16809	12	GO:0051716	GO:0030695	GO:0005515	GO:0010033	GO:0008585	GO:0044424	GO:0043234	GO:0006417	GO:0008135	GO:0008366	GO:0006950	GO:0021782
	Unigene17110	4	GO:0046907	GO:0043231	GO:0003006	GO:0016192
	Unigene17157	17	GO:0007043	GO:0048812	GO:0007444	GO:0016337	GO:0035150	GO:0007169	GO:0046872	GO:0007272	GO:0048667	GO:0007420	GO:0005918	GO:0021675	GO:0042995	GO:0048588	GO:0035006	GO:0043062	GO:0021782
	Unigene17386	4	GO:0001709	GO:0006281	GO:0007126	GO:0003006
	Unigene1769	5	GO:0005681	GO:0000377	GO:0045069	GO:0006397	GO:0016246
	Unigene1835	16	GO:0001751	GO:0051707	GO:0001071	GO:0003676	GO:0055002	GO:0006350	GO:0005622	GO:0005506	GO:0035071	GO:0007292	GO:0035112	GO:0003824	GO:0044248	GO:0016564	GO:0019538	GO:0050793
	Unigene1872	13	GO:0007423	GO:0000166	GO:0003006	GO:0016787	GO:0003676	GO:0009887	GO:0050877	GO:0048736	GO:0050794	GO:0043229	GO:0007399	GO:0048598	GO:0006325
	Unigene1877	23	GO:0016888	GO:0043005	GO:0033057	GO:0016246	GO:0000737	GO:0048729	GO:0016891	GO:0002164	GO:0000267	GO:0048806	GO:0030326	GO:0001763	GO:0040009	GO:0031332	GO:0007059	GO:0030323	GO:0003723	GO:0022403	GO:0035196	GO:0006950	GO:0055001	GO:0048646	GO:0050793
	Unigene19020	3	GO:0008283	GO:0007126	GO:0008406
	Unigene19152	9	GO:0016192	GO:0006996	GO:0007423	GO:0009887	GO:0031090	GO:0003006	GO:0048477	GO:0007028	GO:0051649
	Unigene19160	8	GO:0043231	GO:0007010	GO:0007044	GO:0004713	GO:0048232	GO:0000166	GO:0009792	GO:0006464
	Unigene19235	16	GO:0030097	GO:0009880	GO:0001745	GO:0002164	GO:0004672	GO:0051301	GO:0007259	GO:0050896	GO:0001736	GO:0003002	GO:0002252	GO:0030707	GO:0000904	GO:0007560	GO:0042386	GO:0016477
	Unigene19405	5	GO:0043231	GO:0006906	GO:0019094	GO:0061245	GO:0007017
	Unigene19422	23	GO:0001501	GO:0005026	GO:0042221	GO:0007369	GO:0032768	GO:0000166	GO:0007320	GO:0034711	GO:0008283	GO:0016021	GO:0008406	GO:0009855	GO:0044424	GO:0045639	GO:0003002	GO:0030282	GO:0001932	GO:0043235	GO:0048232	GO:0032278	GO:0032403	GO:0032924	GO:0030509
	Unigene19458	23	GO:0004871	GO:0004629	GO:0030695	GO:0016020	GO:0006937	GO:0043231	GO:0051056	GO:0005626	GO:0043549	GO:0048513	GO:0046339	GO:0007169	GO:0046872	GO:0031267	GO:0051480	GO:0006996	GO:0019637	GO:0007186	GO:0012505	GO:0016049	GO:0044444	GO:0048015	GO:0000165
	Unigene19490	4	GO:0043231	GO:0044444	GO:0048232	GO:0044425
	Unigene19537	17	GO:0007411	GO:0045596	GO:0005913	GO:0016337	GO:0007389	GO:0045137	GO:0010975	GO:0051301	GO:0007297	GO:0010769	GO:0048675	GO:0002009	GO:0042051	GO:0071844	GO:0060541	GO:0005488	GO:0048598
	Unigene1961	10	GO:0008038	GO:0048675	GO:0043005	GO:0044297	GO:0007420	GO:0006935	GO:0042802	GO:0006897	GO:0043498	GO:0004888
	Unigene19740	1	GO:0003006
	Unigene19798	7	GO:0043231	GO:0044238	GO:0044260	GO:0046872	GO:0019866	GO:0016874	GO:0048232
	Unigene19808	9	GO:0051179	GO:0022008	GO:0023052	GO:0071944	GO:0005515	GO:0048468	GO:0048477	GO:0005737	GO:0071842
	Unigene19820	3	GO:0009987	GO:0048513	GO:0022414
	Unigene19859	7	GO:0040009	GO:0009057	GO:0005740	GO:0005506	GO:0044237	GO:0040011	GO:0016670
	Unigene19904	16	GO:0009605	GO:0043231	GO:0004620	GO:0048518	GO:0003006	GO:0010033	GO:0005543	GO:0048513	GO:0006690	GO:0046872	GO:0031410	GO:0031090	GO:0009719	GO:0006950	GO:0004091	GO:0006644
	Unigene19980	9	GO:0043234	GO:0000794	GO:0031981	GO:0000775	GO:0000785	GO:0048232	GO:0007281	GO:0044430	GO:0007140
	Unigene20003	4	GO:0048806	GO:0007592	GO:0048729	GO:0002164
	Unigene20049	17	GO:0007338	GO:0071944	GO:0032991	GO:0007275	GO:0040007	GO:0015629	GO:0044237	GO:0051649	GO:0032155	GO:0016192	GO:0048856	GO:0050789	GO:0016043	GO:0048029	GO:0008233	GO:0044444	GO:0019538
	Unigene20078	8	GO:0043161	GO:0005488	GO:0016049	GO:0031227	GO:0006886	GO:0008283	GO:0006950	GO:0006984
	Unigene20268	4	GO:0010468	GO:0003712	GO:0043231	GO:0048232
	Unigene20369	13	GO:0031981	GO:0000785	GO:0030528	GO:0000166	GO:0006357	GO:0016055	GO:0016585	GO:0060746	GO:0006461	GO:0008283	GO:0019904	GO:0043565	GO:0003723
	Unigene20382	4	GO:0005488	GO:0030011	GO:0010627	GO:0045570
	Unigene204	10	GO:0009653	GO:0007163	GO:0005913	GO:0045165	GO:0051301	GO:0008105	GO:0030707	GO:0009790	GO:0071844	GO:0009994
	Unigene20447	5	GO:0006351	GO:0003676	GO:0001071	GO:0043231	GO:0003006
	Unigene20498	8	GO:0007265	GO:0048675	GO:0005088	GO:0007420	GO:0007010	GO:0006935	GO:0010769	GO:0016020
	Unigene20555	7	GO:0005622	GO:0002164	GO:0035264	GO:0040009	GO:0000166	GO:0009653	GO:0048806
	Unigene20594	3	GO:0009987	GO:0032501	GO:0003006
	Unigene20597	6	GO:0016763	GO:0034404	GO:0046483	GO:0010259	GO:0007292	GO:0009792
	Unigene20674	41	GO:0030326	GO:0048048	GO:0044335	GO:0014020	GO:0061348	GO:0006915	GO:0030278	GO:0060560	GO:0008284	GO:0010557	GO:0044093	GO:0032846	GO:0005626	GO:0021987	GO:0044340	GO:0001667	GO:0045596	GO:0042476	GO:0006898	GO:0000904	GO:2000150	GO:0021536	GO:0009798	GO:0048771	GO:0001702	GO:0002011	GO:0021872	GO:0030182	GO:0035112	GO:0005515	GO:0001101	GO:0008285	GO:0001756	GO:0003143	GO:0048754	GO:0007476	GO:0060788	GO:0060536	GO:0016020	GO:0005768	GO:2000160
	Unigene20697	17	GO:0007417	GO:0065008	GO:0007052	GO:0006959	GO:0048534	GO:0007297	GO:0007169	GO:0030036	GO:0031224	GO:0030030	GO:0032559	GO:0006464	GO:0004714	GO:0033554	GO:0007431	GO:0002682	GO:0048598
	Unigene20770	6	GO:0048638	GO:0016079	GO:0016462	GO:0048193	GO:0044424	GO:0032559
	Unigene20787	11	GO:0032583	GO:0042221	GO:0016787	GO:0009411	GO:0031461	GO:0006915	GO:0016049	GO:0005488	GO:0000086	GO:0010466	GO:0016564
	Unigene20794	23	GO:0032879	GO:0004672	GO:0007010	GO:0031252	GO:0043062	GO:0051647	GO:0016477	GO:0007409	GO:0003008	GO:0007165	GO:0048646	GO:0005515	GO:0048522	GO:0065008	GO:0007166	GO:0051239	GO:0045926	GO:0044444	GO:0005634	GO:0031345	GO:0006468	GO:0001944	GO:0005924
	Unigene20820	23	GO:0007309	GO:0007619	GO:0007420	GO:0007613	GO:0008306	GO:0001505	GO:0009416	GO:0007409	GO:0006935	GO:0007626	GO:0048741	GO:0022410	GO:0005515	GO:0000278	GO:0048638	GO:0003723	GO:0008283	GO:0006338	GO:0031332	GO:0006412	GO:0044444	GO:0031345	GO:0010769
	Unigene20846	15	GO:0006909	GO:0044448	GO:0032991	GO:0007043	GO:0033673	GO:0065008	GO:0045165	GO:0007297	GO:0008105	GO:0002009	GO:0035088	GO:0030010	GO:0007399	GO:0044459	GO:0005488
	Unigene20930	16	GO:0006810	GO:0007179	GO:0005024	GO:0016021	GO:0030036	GO:0019827	GO:0048592	GO:0032559	GO:0008595	GO:0007281	GO:0006464	GO:0008582	GO:0007447	GO:0030703	GO:0030509	GO:0007472
	Unigene20939	1	GO:0007297
	Unigene20955	9	GO:0008409	GO:0006396	GO:0031981	GO:0046914	GO:0040007	GO:0006308	GO:0048232	GO:0065007	GO:0006350
	Unigene20971	19	GO:0033036	GO:0046914	GO:0042478	GO:0009888	GO:0009605	GO:0007626	GO:0016020	GO:0043231	GO:0003006	GO:0051301	GO:0007635	GO:0002118	GO:0003676	GO:0019827	GO:0001709	GO:0019787	GO:0044444	GO:0007472	GO:0008593
	Unigene20978	9	GO:0003723	GO:0005681	GO:0007563	GO:0000377	GO:0007010	GO:0048511	GO:0007626	GO:0033036	GO:0007300
	Unigene21034	7	GO:0033036	GO:0051641	GO:0044424	GO:0006350	GO:0071840	GO:0007309	GO:0050794
	Unigene21061	13	GO:0000781	GO:0042221	GO:0005515	GO:0006310	GO:0044428	GO:0043565	GO:0043234	GO:0009628	GO:0022415	GO:0003690	GO:0007399	GO:0003824	GO:0006281
	Unigene21206	9	GO:0048675	GO:0005088	GO:0007420	GO:0007010	GO:0006935	GO:0010769	GO:0004721	GO:0007266	GO:0016020
	Unigene21230	10	GO:0009653	GO:0048037	GO:0008202	GO:0043436	GO:0006665	GO:0008406	GO:0016832	GO:0030154	GO:0048609	GO:0031227
	Unigene21295	5	GO:0006629	GO:0007297	GO:0005488	GO:0004629	GO:0023052
	Unigene2161	7	GO:0065008	GO:0032991	GO:0007293	GO:0045807	GO:0007297	GO:0005515	GO:0044464
	Unigene21857	1	GO:0007617
	Unigene2186	11	GO:0006979	GO:0048609	GO:0043231	GO:0046914	GO:0006801	GO:0042802	GO:0040025	GO:0044444	GO:0040009	GO:0016209	GO:0003824
	Unigene21865	3	GO:0007276	GO:0043231	GO:0003006
	Unigene2191	9	GO:0046914	GO:0006357	GO:0043231	GO:0040007	GO:0007128	GO:0007281	GO:0007129	GO:0034968	GO:0016279
	Unigene21941	11	GO:0009451	GO:0005488	GO:0006278	GO:0003964	GO:0042254	GO:0016853	GO:0030529	GO:0003006	GO:0010467	GO:0005654	GO:0016836
	Unigene21952	11	GO:0070011	GO:0044267	GO:0006909	GO:0007297	GO:0001558	GO:0009887	GO:0048534	GO:0007399	GO:0014706	GO:0007166	GO:0035051
	Unigene21963	9	GO:0007043	GO:0007164	GO:0030136	GO:0035264	GO:0030036	GO:0008361	GO:0051234	GO:0002009	GO:0001703
	Unigene21980	6	GO:0007292	GO:0048193	GO:0044432	GO:0007166	GO:0043112	GO:0006605
	Unigene21989	21	GO:0009880	GO:0017145	GO:0008360	GO:0048859	GO:0001745	GO:0003382	GO:0004672	GO:0006955	GO:0042074	GO:0007259	GO:0007297	GO:0044424	GO:0035167	GO:0001736	GO:0003002	GO:0002252	GO:0006950	GO:0007560	GO:0042386	GO:0002682	GO:0060541
	Unigene22072	8	GO:0033764	GO:0005488	GO:0016125	GO:0006635	GO:0005319	GO:0003006	GO:0044439	GO:0016836
	Unigene22079	9	GO:0051716	GO:0005515	GO:0045926	GO:0008361	GO:0005622	GO:0023060	GO:0044238	GO:0048523	GO:0035466
	Unigene22105	15	GO:0006909	GO:0048812	GO:0003712	GO:0070603	GO:0010468	GO:0035468	GO:0003676	GO:0003002	GO:0048667	GO:0032559	GO:0006338	GO:0007292	GO:0002376	GO:0042623	GO:0007476
	Unigene22133	18	GO:0005929	GO:0034613	GO:0005815	GO:0032401	GO:0003006	GO:0007610	GO:0021543	GO:0044463	GO:0043234	GO:0042384	GO:0009887	GO:0030154	GO:0060295	GO:0043954	GO:0035264	GO:0021544	GO:0005886	GO:0005488
	Unigene22143	14	GO:0000273	GO:0001669	GO:0003006	GO:0030554	GO:0031980	GO:0043234	GO:0006544	GO:0009060	GO:0042995	GO:0006873	GO:0016668	GO:0048598	GO:0022904	GO:0019538
	Unigene22222	8	GO:0009790	GO:0035264	GO:0007166	GO:0043232	GO:0043231	GO:0034483	GO:0051604	GO:0009798
	Unigene22234	8	GO:0010468	GO:0003006	GO:0006351	GO:0048513	GO:0048518	GO:0005515	GO:0050794	GO:0044424
	Unigene22253	6	GO:0005488	GO:0006325	GO:0001071	GO:0007126	GO:0043231	GO:0019953
	Unigene22290	28	GO:0006810	GO:0014020	GO:0005929	GO:0034613	GO:0032401	GO:0030092	GO:0031253	GO:0031175	GO:0050890	GO:0021543	GO:0007610	GO:0031023	GO:0003143	GO:0042462	GO:0005813	GO:0006629	GO:0003774	GO:0043234	GO:0042384	GO:0007281	GO:0015631	GO:0060295	GO:0043954	GO:0021544	GO:0007606	GO:0000910	GO:0034453	GO:0001894
	Unigene22877	8	GO:0006810	GO:0016021	GO:0005326	GO:0015291	GO:0080134	GO:0007154	GO:0004888	GO:0042065
	Unigene22898	3	GO:0009987	GO:0003677	GO:0003006
	Unigene23045	9	GO:0007411	GO:0005515	GO:0016337	GO:0007389	GO:0016021	GO:0007154	GO:0042051	GO:0030516	GO:0031345
	Unigene2308	7	GO:0009653	GO:0012501	GO:0003006	GO:0048513	GO:0050789	GO:0030154	GO:0048477
	Unigene23122	30	GO:0033483	GO:0048468	GO:0006357	GO:0016055	GO:0072044	GO:0060433	GO:0043009	GO:0043062	GO:0005198	GO:0001656	GO:0016337	GO:0032583	GO:0007163	GO:0045597	GO:0001570	GO:0008283	GO:0001664	GO:0048589	GO:0003002	GO:0043410	GO:0072070	GO:0000187	GO:0030323	GO:0060485	GO:0048598	GO:0032526	GO:0060536	GO:0016020	GO:0044421	GO:0008589
	Unigene23482	6	GO:0048675	GO:0016337	GO:0005488	GO:0004871	GO:0016021	GO:0007389
	Unigene23582	11	GO:0032583	GO:0042221	GO:0009411	GO:0031461	GO:0006915	GO:0016049	GO:0008233	GO:0005488	GO:0000086	GO:0010466	GO:0016564
	Unigene24632	9	GO:0006412	GO:0007276	GO:0006396	GO:0043234	GO:0003676	GO:0016604	GO:0050658	GO:0000956	GO:0030529
	Unigene24772	7	GO:0009790	GO:0040009	GO:0035264	GO:0009653	GO:0009987	GO:0002164	GO:0005604
	Unigene24793	13	GO:0044248	GO:0048545	GO:0009897	GO:0000323	GO:0035036	GO:0009628	GO:0031667	GO:0046872	GO:0005624	GO:0008484	GO:0007399	GO:0030141	GO:0044421
	Unigene25228	9	GO:0015078	GO:0015986	GO:0002164	GO:0033176	GO:0019829	GO:0040009	GO:0006897	GO:0032559	GO:0009790
	Unigene25421	8	GO:0007338	GO:0000267	GO:0004114	GO:0008233	GO:0019219	GO:0005488	GO:0044444	GO:0031326
	Unigene25437	13	GO:0042478	GO:0007243	GO:0008360	GO:0030695	GO:0044464	GO:0006929	GO:0007154	GO:0019827	GO:0009966	GO:0007292	GO:0007484	GO:0005488	GO:0007472
	Unigene25672	18	GO:0048037	GO:0006732	GO:0000166	GO:0006694	GO:0008203	GO:0045137	GO:0007632	GO:0005777	GO:0016616	GO:0031224	GO:0042802	GO:0031090	GO:0043405	GO:0006720	GO:0044446	GO:0007276	GO:0042598	GO:0045844
	Unigene25674	10	GO:0008038	GO:0048675	GO:0043005	GO:0044297	GO:0007420	GO:0006935	GO:0042802	GO:0006897	GO:0043498	GO:0004888
	Unigene25726	9	GO:0046872	GO:0003724	GO:0003676	GO:0051726	GO:0003006	GO:0044464	GO:0048513	GO:0048232	GO:0032559
	Unigene25825	57	GO:0030326	GO:0048048	GO:0014020	GO:0044335	GO:0010468	GO:0030177	GO:0061348	GO:0030278	GO:0060560	GO:0001932	GO:0008284	GO:0010557	GO:0031982	GO:0004857	GO:0032846	GO:0005215	GO:0070723	GO:0004872	GO:0005626	GO:0021987	GO:0044340	GO:0051726	GO:0001667	GO:0030169	GO:0045596	GO:0042476	GO:0006898	GO:0000904	GO:2000150	GO:0021536	GO:0044459	GO:0009798	GO:0010656	GO:0048771	GO:0001702	GO:0002011	GO:0006469	GO:0021872	GO:0030182	GO:0035112	GO:0042802	GO:0001101	GO:0008285	GO:0007267	GO:0001756	GO:0003143	GO:0007155
	Unigene25883	9	GO:0010558	GO:0004661	GO:0043234	GO:0051726	GO:0046914	GO:0008289	GO:0008283	GO:0007338	GO:0010033
	Unigene26086	14	GO:0035091	GO:0032989	GO:0007417	GO:0008154	GO:0051276	GO:0008092	GO:0045185	GO:0019094	GO:0001700	GO:0000912	GO:0005856	GO:0006935	GO:0048232	GO:0007560
	Unigene26438	6	GO:0022414	GO:0007166	GO:0048568	GO:0005593	GO:0005102	GO:0009987
	Unigene26606	10	GO:0008038	GO:0048675	GO:0043005	GO:0044297	GO:0007420	GO:0006935	GO:0042802	GO:0006897	GO:0043498	GO:0004888
	Unigene26645	13	GO:0031981	GO:0046914	GO:0007275	GO:0003006	GO:0003712	GO:0006376	GO:0006694	GO:0010468	GO:0008285	GO:0003676	GO:0012502	GO:0030529	GO:0007049
	Unigene26695	20	GO:0032182	GO:0031981	GO:0006357	GO:0003916	GO:0019901	GO:0001071	GO:0051301	GO:0006259	GO:0030261	GO:0046983	GO:0005694	GO:0042802	GO:0032559	GO:0005813	GO:0043234	GO:0009790	GO:0006915	GO:0045070	GO:0042623	GO:0033554
	Unigene26816	20	GO:0032182	GO:0031981	GO:0006357	GO:0003916	GO:0019901	GO:0001071	GO:0051301	GO:0006259	GO:0030261	GO:0046983	GO:0005694	GO:0042802	GO:0032559	GO:0005813	GO:0043234	GO:0009790	GO:0006915	GO:0045070	GO:0042623	GO:0033554
	Unigene27670	1	GO:0007338
	Unigene28097	22	GO:0019838	GO:0007448	GO:0045704	GO:0016020	GO:0007179	GO:0016337	GO:0005024	GO:0005770	GO:0048870	GO:0019827	GO:0001700	GO:0048592	GO:0032559	GO:0001709	GO:0007281	GO:0006464	GO:0008582	GO:0030703	GO:0060541	GO:0046620	GO:0007476	GO:0016564
	Unigene28208	10	GO:0009987	GO:0002164	GO:0007632	GO:0035264	GO:0009584	GO:0048513	GO:0040009	GO:0009653	GO:0005578	GO:0009790
	Unigene28263	17	GO:0046914	GO:0044448	GO:0032991	GO:0023033	GO:0007611	GO:0007043	GO:0004672	GO:0045165	GO:0007405	GO:0008105	GO:0002009	GO:0035088	GO:0032559	GO:0007309	GO:0006464	GO:0044459	GO:0046666
	Unigene28737	8	GO:0008092	GO:0007293	GO:0005856	GO:0005913	GO:0007010	GO:0050839	GO:0016323	GO:0019897
	Unigene28783	17	GO:0010952	GO:0000737	GO:0006357	GO:0043231	GO:0048562	GO:0008585	GO:0001071	GO:0022601	GO:0007519	GO:0035258	GO:0003677	GO:0006915	GO:0012502	GO:0030154	GO:0018993	GO:0019899	GO:0030234
	Unigene28926	13	GO:0007338	GO:0043231	GO:0018024	GO:0010468	GO:0046872	GO:0006350	GO:0043234	GO:0006464	GO:0032259	GO:0008233	GO:0019219	GO:0016568	GO:0031326
	Unigene29104	11	GO:0001501	GO:0004175	GO:0044431	GO:0006518	GO:0001999	GO:0048513	GO:0003002	GO:0019058	GO:0016486	GO:0048565	GO:0005488
	Unigene29415	13	GO:0030528	GO:0006357	GO:0043231	GO:0010557	GO:0001071	GO:0003676	GO:0003002	GO:0060180	GO:0009790	GO:0007619	GO:0006935	GO:0022008	GO:0007431
	Unigene29952	6	GO:0008092	GO:0030032	GO:0019094	GO:0003012	GO:0005865	GO:0048812
	Unigene30207	5	GO:0005488	GO:0006810	GO:0009987	GO:0019953	GO:0032991
	Unigene30419	1	GO:0007338
	Unigene30593	8	GO:0008092	GO:0009888	GO:0048675	GO:0042478	GO:0008287	GO:0007476	GO:0004722	GO:0001700
	Unigene30780	8	GO:0031980	GO:0046692	GO:0006103	GO:0006734	GO:0045333	GO:0006519	GO:0005515	GO:0016639
	Unigene31678	14	GO:0032991	GO:0005515	GO:0009062	GO:0016558	GO:0000268	GO:0021953	GO:0021987	GO:0051259	GO:0006720	GO:0050877	GO:0007005	GO:0044439	GO:0035264	GO:0016477
	Unigene31712	5	GO:0044464	GO:0046914	GO:0042755	GO:0040009	GO:0002164
	Unigene31875	11	GO:0016568	GO:0007276	GO:0007417	GO:0000070	GO:0004175	GO:0051297	GO:0007051	GO:0048513	GO:0045137	GO:0030071	GO:0044424
	Unigene32844	2	GO:0044424	GO:0007618
	Unigene3287	12	GO:0030528	GO:0043231	GO:0010468	GO:0000768	GO:0001071	GO:0003677	GO:0007494	GO:0048513	GO:0014706	GO:0006351	GO:0003006	GO:0055002
	Unigene3299	17	GO:0044446	GO:0022403	GO:0006281	GO:0042770	GO:0043234	GO:0009314	GO:0022414	GO:0010033	GO:0000226	GO:0000910	GO:0005515	GO:0006310	GO:0048522	GO:0008283	GO:0030879	GO:0044444	GO:0005634
	Unigene33308	22	GO:0033036	GO:0008544	GO:0005515	GO:0031638	GO:0046546	GO:0043231	GO:0006516	GO:0003823	GO:0006694	GO:0008283	GO:0008203	GO:0043523	GO:0030554	GO:0031224	GO:0007264	GO:0031090	GO:0022402	GO:0006950	GO:0012505	GO:0016628	GO:0043066	GO:0010466
	Unigene3345	8	GO:0007338	GO:0043231	GO:0008375	GO:0006487	GO:0031090	GO:0048029	GO:0008233	GO:0044444
	Unigene34087	10	GO:0008038	GO:0048675	GO:0043005	GO:0044297	GO:0007420	GO:0006935	GO:0042802	GO:0006897	GO:0043498	GO:0004888
	Unigene34110	14	GO:0007411	GO:0005515	GO:0060026	GO:0000166	GO:0005626	GO:0004713	GO:0042074	GO:0051283	GO:0016021	GO:0023060	GO:0035567	GO:0009887	GO:0030517	GO:0004888
	Unigene344	7	GO:0048869	GO:0043231	GO:0006357	GO:0003677	GO:0005515	GO:0007275	GO:0003006
	Unigene3453	6	GO:0016477	GO:0002164	GO:0035264	GO:0010259	GO:0040009	GO:0009790
	Unigene34901	14	GO:0006810	GO:0048859	GO:0051301	GO:0007297	GO:0017022	GO:0032155	GO:0035151	GO:0046872	GO:0030036	GO:0016887	GO:0001738	GO:0007476	GO:0035190	GO:0016459
	Unigene3498	10	GO:0005488	GO:0043231	GO:0043234	GO:0006259	GO:0007059	GO:0007143	GO:0016889	GO:0048232	GO:0044444	GO:0007140
	Unigene35288	52	GO:0030326	GO:0048048	GO:0014020	GO:0044335	GO:0010468	GO:0030177	GO:0061348	GO:0030278	GO:0060560	GO:0001932	GO:0008284	GO:0010557	GO:0031982	GO:0004857	GO:0032846	GO:0005215	GO:0070723	GO:0004872	GO:0005626	GO:0021987	GO:0044340	GO:0051726	GO:0001667	GO:0030169	GO:0045596	GO:0042476	GO:0006898	GO:0000904	GO:2000150	GO:0021536	GO:0044459	GO:0009798	GO:0010656	GO:0048771	GO:0001702	GO:0002011	GO:0006469	GO:0021872	GO:0030182	GO:0035112	GO:0042802	GO:0001101	GO:0008285	GO:0001756	GO:0003143	GO:0048754	GO:0007476
	Unigene35321	9	GO:0035097	GO:0003712	GO:0051726	GO:0051704	GO:0010468	GO:0001071	GO:0006461	GO:0006351	GO:0019042
	Unigene35678	8	GO:0050896	GO:0043231	GO:0003676	GO:0010468	GO:0001071	GO:0007478	GO:0048086	GO:0008406
	Unigene35872	9	GO:0008092	GO:0007293	GO:0007015	GO:0035171	GO:0010259	GO:0043063	GO:0033036	GO:0035324	GO:0008306
	Unigene35915	12	GO:0046552	GO:0030528	GO:0005488	GO:0043231	GO:0007420	GO:0006935	GO:0007449	GO:0035108	GO:0003006	GO:0010467	GO:0007560	GO:0001751
	Unigene36078	11	GO:0048675	GO:0009996	GO:0009266	GO:0043436	GO:0035194	GO:0060446	GO:0044424	GO:0016831	GO:0048037	GO:0001751	GO:0035146
	Unigene3640	40	GO:0048704	GO:0031224	GO:0006915	GO:0007178	GO:0001701	GO:0010557	GO:0009628	GO:0048732	GO:0048534	GO:0016049	GO:0031346	GO:0005160	GO:0034694	GO:0032559	GO:0044459	GO:0001934	GO:0012502	GO:0030857	GO:0043235	GO:0010740	GO:0007276	GO:0051098	GO:0030198	GO:0005024	GO:0045165	GO:0048545	GO:0019838	GO:0008283	GO:0048514	GO:0006928	GO:0010628	GO:0003002	GO:0043169	GO:0046983	GO:0030323	GO:0006950	GO:0000165	GO:0019899	GO:0046332	GO:0033160
	Unigene36734	8	GO:0016477	GO:0043062	GO:0007268	GO:0040009	GO:0005578	GO:0005198	GO:0044464	GO:0008104
	Unigene37053	10	GO:0005099	GO:0006996	GO:0043231	GO:0016049	GO:0051726	GO:0023033	GO:0007155	GO:0005515	GO:0044444	GO:0007165
	Unigene37675	5	GO:0040009	GO:0070838	GO:0031224	GO:0009987	GO:0015368
	Unigene37818	7	GO:0004175	GO:0007338	GO:0032991	GO:0016023	GO:0045762	GO:0044267	GO:0048029
	Unigene3808	6	GO:0007472	GO:0007297	GO:0060541	GO:0007010	GO:0050794	GO:0007509
	Unigene38543	7	GO:0007411	GO:0005488	GO:0007297	GO:0005622	GO:0048513	GO:0007033	GO:0006914
	Unigene38924	9	GO:0015078	GO:0015986	GO:0002164	GO:0033176	GO:0019829	GO:0040009	GO:0006897	GO:0032559	GO:0009790
	Unigene3931	16	GO:0040003	GO:0016020	GO:0004672	GO:0010975	GO:0005543	GO:0044424	GO:0007169	GO:0045927	GO:0032559	GO:0006464	GO:0016049	GO:0035264	GO:0060541	GO:0010876	GO:0006606	GO:0043066
	Unigene39406	7	GO:0005488	GO:0044238	GO:0044260	GO:0002164	GO:0035264	GO:0040009	GO:0003824
	Unigene3950	20	GO:0007178	GO:0048592	GO:0007090	GO:0043234	GO:0001071	GO:0008582	GO:0043231	GO:0045704	GO:0010551	GO:0007448	GO:0007350	GO:0016564	GO:0001700	GO:0003677	GO:0060541	GO:0007281	GO:0007476	GO:0019827	GO:0007478	GO:0005072
	Unigene39584	17	GO:0007411	GO:0006351	GO:0030528	GO:0045704	GO:0007178	GO:0043231	GO:0010468	GO:0007478	GO:0001071	GO:0003676	GO:0019827	GO:0005072	GO:0043234	GO:0009798	GO:0007281	GO:0008582	GO:0007472
	Unigene39697	14	GO:0006810	GO:0048859	GO:0051301	GO:0007297	GO:0017022	GO:0032155	GO:0035151	GO:0046872	GO:0030036	GO:0016887	GO:0001738	GO:0007476	GO:0035190	GO:0016459
	Unigene39742	13	GO:0030100	GO:0019829	GO:0002164	GO:0040011	GO:0046873	GO:0010259	GO:0040009	GO:0051480	GO:0031224	GO:0032559	GO:0009790	GO:0070838	GO:0009206
	Unigene3978	4	GO:0007338	GO:0044238	GO:0009987	GO:0005488
	Unigene40017	5	GO:0003002	GO:0048675	GO:0005488	GO:0016021	GO:0016198
	Unigene4012	6	GO:0015631	GO:0000226	GO:0005813	GO:0009566	GO:0000922	GO:0005198
	Unigene4029	5	GO:0007338	GO:0044237	GO:0044238	GO:0048029	GO:0008233
	Unigene40309	8	GO:0023061	GO:0015804	GO:0015718	GO:0031224	GO:0015711	GO:0005275	GO:0045202	GO:0007619
	Unigene40528	9	GO:0008092	GO:0007293	GO:0007015	GO:0035171	GO:0010259	GO:0043063	GO:0033036	GO:0035324	GO:0008306
	Unigene4061	10	GO:0044448	GO:0007613	GO:0016787	GO:0019094	GO:0010603	GO:0008105	GO:0006417	GO:0001709	GO:0030529	GO:0003729
	Unigene4109	1	GO:0040009
	Unigene41298	8	GO:0005515	GO:0044237	GO:0016740	GO:0006915	GO:0044238	GO:0048232	GO:0050794	GO:0005634
	Unigene42036	8	GO:0031980	GO:0046692	GO:0006103	GO:0006734	GO:0045333	GO:0006519	GO:0005515	GO:0016639
	Unigene4206	3	GO:0008354	GO:0016192	GO:0016020
	Unigene42152	6	GO:0004175	GO:0007338	GO:0001669	GO:0032991	GO:0045762	GO:0048029
	Unigene4222	4	GO:0009987	GO:0005488	GO:0019866	GO:0048232
	Unigene4223	24	GO:0046888	GO:0060123	GO:0032991	GO:0051427	GO:0004725	GO:0043231	GO:0033500	GO:0032432	GO:0005626	GO:0006639	GO:0004672	GO:0006796	GO:0050796	GO:0007169	GO:0033157	GO:0048667	GO:0006464	GO:0035264	GO:0044459	GO:0019899	GO:0044444	GO:0022414	GO:0031570	GO:0000165
	Unigene42232	7	GO:0005815	GO:0007126	GO:0000741	GO:0007308	GO:0000087	GO:0007052	GO:0015631
	Unigene42329	22	GO:0000038	GO:0046469	GO:0005626	GO:0008283	GO:0008585	GO:0004623	GO:0006906	GO:0005543	GO:0000302	GO:0046872	GO:0030282	GO:0001660	GO:0001516	GO:0033273	GO:0031090	GO:0010038	GO:0006915	GO:0048875	GO:0031960	GO:0031349	GO:0030141	GO:0002237
	Unigene4294	23	GO:0007166	GO:0043005	GO:0001751	GO:0005515	GO:0004683	GO:0006582	GO:0016909	GO:0043231	GO:0043407	GO:0042742	GO:0005977	GO:0007297	GO:0009886	GO:0007391	GO:0006468	GO:0044319	GO:0032559	GO:0043234	GO:0006935	GO:0048858	GO:0048588	GO:0001738	GO:0000165
	Unigene43332	4	GO:0007276	GO:0043232	GO:0003006	GO:0044444
	Unigene44451	7	GO:0005624	GO:0007155	GO:0012505	GO:0007281	GO:0030141	GO:0016787	GO:0016020
	Unigene44637	12	GO:0005083	GO:0008047	GO:0007613	GO:0035264	GO:0010259	GO:0007626	GO:0019935	GO:0051056	GO:0044464	GO:0008306	GO:0042065	GO:0006950
	Unigene44828	14	GO:0032991	GO:0005515	GO:0009062	GO:0016558	GO:0000268	GO:0021953	GO:0021987	GO:0051259	GO:0006720	GO:0050877	GO:0007005	GO:0044439	GO:0035264	GO:0016477
	Unigene44918	12	GO:0001751	GO:0051707	GO:0001071	GO:0003676	GO:0055002	GO:0007292	GO:0008219	GO:0035112	GO:0035070	GO:0044248	GO:0016564	GO:0050793
	Unigene45044	9	GO:0005875	GO:0048675	GO:0016337	GO:0004871	GO:0016021	GO:0046872	GO:0003774	GO:0007017	GO:0007389
	Unigene45272	10	GO:0008038	GO:0048675	GO:0043005	GO:0044297	GO:0007420	GO:0006935	GO:0042802	GO:0006897	GO:0043498	GO:0004888
	Unigene45275	10	GO:0003723	GO:0016055	GO:0060746	GO:0006357	GO:0031981	GO:0006461	GO:0000785	GO:0000166	GO:0019904	GO:0008283
	Unigene4550	12	GO:0009605	GO:0007626	GO:0006357	GO:0043231	GO:0003712	GO:0001752	GO:0051100	GO:0002118	GO:0001700	GO:0007281	GO:0048565	GO:0007476
	Unigene45888	1	GO:0005488
	Unigene46019	9	GO:0043062	GO:0048869	GO:0009888	GO:0005488	GO:0007188	GO:0009653	GO:0022414	GO:0004888	GO:0016020
	Unigene46046	5	GO:0008233	GO:0032991	GO:0048029	GO:0016811	GO:0007338
	Unigene46155	14	GO:0016477	GO:0017111	GO:0007097	GO:0043234	GO:0002164	GO:0007292	GO:0000087	GO:0043623	GO:0007051	GO:0032561	GO:0040009	GO:0005819	GO:0048806	GO:0009790
	Unigene46755	3	GO:0007127	GO:0007292	GO:0007143
	Unigene46973	13	GO:0030307	GO:0007155	GO:0012501	GO:0051647	GO:0008283	GO:0048732	GO:0044424	GO:0005578	GO:0030308	GO:0006935	GO:0060562	GO:0005488	GO:0016477
	Unigene47377	10	GO:0008038	GO:0048675	GO:0043005	GO:0044297	GO:0007420	GO:0006935	GO:0042802	GO:0006897	GO:0043498	GO:0004888
	Unigene4747	4	GO:0007417	GO:0046914	GO:0043231	GO:0040008
	Unigene47546	58	GO:0030326	GO:0048048	GO:0006006	GO:0004871	GO:0044335	GO:0014020	GO:0010468	GO:0061348	GO:0031224	GO:0006915	GO:0030278	GO:0060560	GO:0008284	GO:0010557	GO:0044093	GO:0032846	GO:0005215	GO:0048534	GO:0005626	GO:0055092	GO:0021987	GO:0044340	GO:0001667	GO:0030169	GO:0045596	GO:0042476	GO:0006898	GO:0000904	GO:2000150	GO:0021536	GO:0023060	GO:0009798	GO:0045597	GO:0048771	GO:0001702	GO:0002011	GO:0006469	GO:0021872	GO:0030182	GO:0035112	GO:0005515	GO:0001101	GO:0007088	GO:0008285	GO:0007267	GO:0001756	GO:0003143
	Unigene47605	6	GO:0006412	GO:0005488	GO:0031981	GO:0002164	GO:0040009	GO:0009790
	Unigene47749	14	GO:0035091	GO:0032989	GO:0007417	GO:0008154	GO:0051276	GO:0008092	GO:0045185	GO:0019094	GO:0001700	GO:0000912	GO:0005856	GO:0006935	GO:0048232	GO:0007560
	Unigene47814	19	GO:0007411	GO:0033334	GO:0009888	GO:0006041	GO:0035115	GO:0001558	GO:0008375	GO:0035468	GO:0015020	GO:0001503	GO:0046983	GO:0031224	GO:0000271	GO:0031090	GO:0015012	GO:0044446	GO:0012505	GO:0005783	GO:0044421
	Unigene47841	18	GO:0005929	GO:0034613	GO:0005815	GO:0032401	GO:0003006	GO:0007610	GO:0021543	GO:0044463	GO:0043234	GO:0009887	GO:0048858	GO:0030154	GO:0060295	GO:0043954	GO:0035264	GO:0021544	GO:0005886	GO:0005488
	Unigene4850	13	GO:0006351	GO:0010565	GO:0043231	GO:0006959	GO:0010468	GO:0004879	GO:0001071	GO:0007591	GO:0003702	GO:0005506	GO:0035071	GO:0003677	GO:0007292
	Unigene48558	5	GO:0007015	GO:0019094	GO:0044444	GO:0030703	GO:0015631
	Unigene48654	14	GO:0005515	GO:0048859	GO:0007446	GO:0000902	GO:0008283	GO:0016337	GO:0035151	GO:0031224	GO:0006464	GO:0030859	GO:0046620	GO:0007472	GO:0035556	GO:0048104
	Unigene4869	4	GO:0007297	GO:0005488	GO:0016192	GO:0023060
	Unigene4871	1	GO:0040009
	Unigene4891	7	GO:0015629	GO:0007317	GO:0017022	GO:0003779	GO:0032559	GO:0042623	GO:0042051
	Unigene49414	12	GO:0048869	GO:0043231	GO:0007126	GO:0016458	GO:0046914	GO:0042623	GO:0007292	GO:0048232	GO:0034660	GO:0043186	GO:0006306	GO:0032559
	Unigene49595	4	GO:0035264	GO:0005083	GO:0044464	GO:0032011
	Unigene49823	9	GO:0031224	GO:0004871	GO:0007167	GO:0004713	GO:0048232	GO:0010467	GO:0032559	GO:0006817	GO:0006464
	Unigene50561	29	GO:0000278	GO:0006351	GO:0046914	GO:0009605	GO:0005515	GO:0009639	GO:0051297	GO:0050658	GO:0043231	GO:0007051	GO:0045165	GO:0010468	GO:0050953	GO:0051276	GO:0001071	GO:0015031	GO:0009648	GO:0003676	GO:0003702	GO:0000775	GO:0003774	GO:0007292	GO:0005875	GO:0030859	GO:0008088	GO:0005876	GO:0035270	GO:0042051	GO:0000922
	Unigene51471	2	GO:0016020	GO:0048232
	Unigene51765	4	GO:0009790	GO:0040009	GO:0002164	GO:0006996
	Unigene52218	17	GO:0006351	GO:0030528	GO:0007178	GO:0043231	GO:0001745	GO:0008283	GO:0001708	GO:0001071	GO:0048102	GO:0003002	GO:0042802	GO:0006915	GO:0007399	GO:0016049	GO:0030703	GO:0016477	GO:0008593
	Unigene52262	22	GO:0014047	GO:0007166	GO:0031893	GO:0002027	GO:0042221	GO:0032846	GO:0016020	GO:0060746	GO:0001990	GO:0031982	GO:0045924	GO:0007320	GO:0008283	GO:0019229	GO:0051480	GO:0001516	GO:0010648	GO:0008528	GO:0003078	GO:0016049	GO:0019932
	Unigene52876	8	GO:0009987	GO:0043229	GO:0003676	GO:0019953	GO:0032501	GO:0022414	GO:0016043	GO:0032502
	Unigene53208	10	GO:0008038	GO:0048675	GO:0043005	GO:0044297	GO:0007420	GO:0006935	GO:0042802	GO:0006897	GO:0043498	GO:0004888
	Unigene53284	10	GO:0005488	GO:0044297	GO:0008049	GO:0005227	GO:0042221	GO:0042995	GO:0030001	GO:0007622	GO:0005887	GO:0005267
	Unigene53421	10	GO:0003002	GO:0016055	GO:0008047	GO:0043231	GO:0007472	GO:0019900	GO:0006909	GO:0007292	GO:0019827	GO:0016020
	Unigene53783	21	GO:0032991	GO:0032989	GO:0008354	GO:0007043	GO:0045570	GO:0065008	GO:0043296	GO:0001752	GO:0045137	GO:0007635	GO:0008285	GO:0001736	GO:0001700	GO:0035088	GO:0008104	GO:0007560	GO:0002780	GO:0005488	GO:0044444	GO:0045202	GO:0007049
	Unigene53874	8	GO:0009790	GO:0040009	GO:0048806	GO:0016477	GO:0010467	GO:0030529	GO:0002164	GO:0005198
	Unigene53885	17	GO:0007417	GO:0065008	GO:0007052	GO:0006959	GO:0048534	GO:0007297	GO:0007169	GO:0030036	GO:0031224	GO:0030030	GO:0032559	GO:0006464	GO:0004714	GO:0033554	GO:0007431	GO:0002682	GO:0048598
	Unigene53958	16	GO:0000166	GO:0030832	GO:0051017	GO:0004713	GO:0051276	GO:0008306	GO:0046872	GO:0007420	GO:0006468	GO:0001700	GO:0005622	GO:0045171	GO:0007431	GO:0007300	GO:0007293	GO:0000165
	Unigene54198	10	GO:0008038	GO:0048675	GO:0043005	GO:0044297	GO:0007420	GO:0006935	GO:0042802	GO:0006897	GO:0043498	GO:0004888
	Unigene54287	15	GO:0030427	GO:0005818	GO:0007267	GO:0070161	GO:0001558	GO:0016198	GO:0007420	GO:0008587	GO:0035148	GO:0035146	GO:0001709	GO:0007019	GO:0015631	GO:0060541	GO:0044444
	Unigene54292	4	GO:0009987	GO:0005488	GO:0019866	GO:0048232
	Unigene54415	9	GO:0043231	GO:0018024	GO:0015630	GO:0046872	GO:0003677	GO:0034708	GO:0006935	GO:0007276	GO:0034968
	Unigene54475	9	GO:0031224	GO:0004871	GO:0007167	GO:0004713	GO:0048232	GO:0010467	GO:0032559	GO:0006817	GO:0006464
	Unigene54947	10	GO:0048565	GO:0043231	GO:0007423	GO:0006355	GO:0001071	GO:0003677	GO:0007380	GO:0007431	GO:0003006	GO:0003702
	Unigene55127	21	GO:0005515	GO:0000726	GO:0010720	GO:0043009	GO:0003676	GO:0019827	GO:0003909	GO:0006996	GO:0008284	GO:0005694	GO:0044428	GO:0006266	GO:0002681	GO:0002320	GO:0032559	GO:0043234	GO:0019058	GO:0010212	GO:0007399	GO:0002204	GO:0043066
	Unigene55239	7	GO:0007411	GO:0016628	GO:0042051	GO:0048489	GO:0030516	GO:0008152	GO:0007154
	Unigene55266	5	GO:0009987	GO:0070011	GO:0044238	GO:0048029	GO:0007338
	Unigene55362	15	GO:0001525	GO:0030307	GO:0007155	GO:0051647	GO:0008283	GO:0048732	GO:0031175	GO:0044424	GO:0048667	GO:0005578	GO:0030308	GO:0006935	GO:0060562	GO:0005488	GO:0016477
	Unigene55490	12	GO:0046914	GO:0007450	GO:0000122	GO:0007626	GO:0043231	GO:0003712	GO:0001071	GO:0006935	GO:0046530	GO:0008589	GO:0046620	GO:0007472
	Unigene55517	10	GO:0043005	GO:0000226	GO:0017148	GO:0007613	GO:0007315	GO:0035194	GO:0044297	GO:0000956	GO:0044424	GO:0044087
	Unigene566	19	GO:0032991	GO:0032989	GO:0007043	GO:0045570	GO:0065008	GO:0043296	GO:0001752	GO:0007635	GO:0008285	GO:0001736	GO:0001700	GO:0035088	GO:0008104	GO:0007560	GO:0002780	GO:0005488	GO:0044444	GO:0022414	GO:0045202
	Unigene56859	17	GO:0000278	GO:0016020	GO:0016458	GO:0034399	GO:0003006	GO:0015630	GO:0040023	GO:0005882	GO:0048592	GO:0006997	GO:0042335	GO:0060446	GO:0012505	GO:0007399	GO:0031967	GO:0005488	GO:0044444
	Unigene57027	4	GO:0005488	GO:0016301	GO:0060179	GO:0042995
	Unigene57085	10	GO:0016192	GO:0006996	GO:0007423	GO:0009887	GO:0031090	GO:0003006	GO:0048477	GO:0007028	GO:0051649
	Unigene57488	24	GO:0022611	GO:0048812	GO:0045570	GO:0006412	GO:0030384	GO:0008283	GO:0048168	GO:0010975	GO:0006796	GO:0002168	GO:0021700	GO:0007169	GO:0045927	GO:0005942	GO:0001700	GO:0030537	GO:0007292	GO:0016307	GO:0006950	GO:0016049	GO:0035264	GO:0019932	GO:0044248	GO:0035004
	Unigene58879	4	GO:0005622	GO:0045449	GO:0003677	GO:0003006
	Unigene59136	11	GO:0060180	GO:0043231	GO:0046872	GO:0010468	GO:0001071	GO:0003677	GO:0004879	GO:0007275	GO:0003006	GO:0007619	GO:0006350
	Unigene59558	8	GO:0048675	GO:0005088	GO:0007420	GO:0007010	GO:0006935	GO:0010769	GO:0007266	GO:0016020
	Unigene60598	13	GO:0006351	GO:0005267	GO:0004673	GO:0060089	GO:0030001	GO:0030534	GO:0044057	GO:0042065	GO:0023060	GO:0005887	GO:0005244	GO:0007606	GO:0007617
	Unigene60664	11	GO:0006412	GO:0003723	GO:0006396	GO:0016458	GO:0007127	GO:0019827	GO:0048232	GO:0034660	GO:0043186	GO:0030529	GO:0006306
	Unigene61421	10	GO:0006810	GO:0048731	GO:0009888	GO:0006996	GO:0016021	GO:0051452	GO:0007155	GO:0005216	GO:0003006	GO:0007166
	Unigene61559	16	GO:0043005	GO:0008610	GO:0001558	GO:0004672	GO:0044297	GO:0048870	GO:0048667	GO:0006468	GO:0032559	GO:0008104	GO:0002119	GO:0006935	GO:0008219	GO:0048588	GO:0035264	GO:0044248
	Unigene61833	12	GO:0031179	GO:0008205	GO:0043231	GO:0016715	GO:0006805	GO:0046914	GO:0007611	GO:0010259	GO:0007292	GO:0042598	GO:0009792	GO:0008395
	Unigene61876	12	GO:0001751	GO:0051707	GO:0001071	GO:0003676	GO:0055002	GO:0005622	GO:0035071	GO:0007292	GO:0035112	GO:0044248	GO:0016564	GO:0050793
	Unigene61911	46	GO:0021766	GO:0010466	GO:0004869	GO:0016202	GO:0070670	GO:0007178	GO:0031981	GO:0030851	GO:0008284	GO:0010557	GO:0048732	GO:0007162	GO:0048562	GO:0030528	GO:0032091	GO:0035258	GO:0043234	GO:0016337	GO:0001707	GO:0003707	GO:0016049	GO:0001503	GO:0042093	GO:0001837	GO:0016477	GO:0045596	GO:0042476	GO:0008544	GO:0044212	GO:0006935	GO:0010551	GO:0030178	GO:0043066	GO:0035112	GO:0019904	GO:0009952	GO:0009953	GO:0010038	GO:0016573	GO:0010564	GO:0035108	GO:0043565	GO:0002763	GO:0000981	GO:0001818	GO:0048066
	Unigene62341	39	GO:0048675	GO:0031016	GO:0004888	GO:0006915	GO:0008284	GO:0042692	GO:0007405	GO:0048232	GO:0001667	GO:0051100	GO:0007418	GO:0033336	GO:0001503	GO:0042476	GO:0021545	GO:0042995	GO:0006935	GO:0010551	GO:0031099	GO:0035239	GO:0006606	GO:0001840	GO:0043010	GO:0000122	GO:0021983	GO:0044424	GO:0009953	GO:0048762	GO:0042472	GO:0045165	GO:0007267	GO:0043113	GO:0006950	GO:0009855	GO:0031647	GO:0044297	GO:0016020	GO:0008589	GO:0035051
	Unigene62528	31	GO:0043005	GO:0051705	GO:0008144	GO:0010970	GO:0007612	GO:0046394	GO:0000267	GO:0006090	GO:0006605	GO:0007632	GO:0010259	GO:0048468	GO:0015813	GO:0003002	GO:0048193	GO:0031410	GO:0016247	GO:0010038	GO:0006520	GO:0030072	GO:0019627	GO:0007186	GO:0048232	GO:0050804	GO:0001707	GO:0055066	GO:0042391	GO:0007006	GO:0021544	GO:0005634	GO:0043066
	Unigene62647	11	GO:0001751	GO:0051707	GO:0003676	GO:0055002	GO:0007292	GO:0008219	GO:0035112	GO:0035070	GO:0044248	GO:0016564	GO:0050793
	Unigene62786	34	GO:0048138	GO:0007309	GO:0001709	GO:0030534	GO:0001751	GO:0007424	GO:0007090	GO:0007445	GO:0002682	GO:0001708	GO:0008069	GO:0006464	GO:0046669	GO:0032559	GO:0035216	GO:0035272	GO:0061245	GO:0016021	GO:0043066	GO:0005515	GO:0001700	GO:0007173	GO:0005006	GO:0007297	GO:0007417	GO:0010669	GO:0007449	GO:0007155	GO:0007476	GO:0007365	GO:0042675	GO:0019827	GO:0048598	GO:0030030
	Unigene62870	39	GO:0030326	GO:0048048	GO:0006006	GO:0004871	GO:0014020	GO:0010468	GO:0060560	GO:0008284	GO:0010557	GO:0031982	GO:0005215	GO:0030111	GO:0070723	GO:0007420	GO:0048534	GO:0005626	GO:0055092	GO:0001667	GO:0030169	GO:0045596	GO:0043231	GO:0044459	GO:0009798	GO:0045597	GO:0001702	GO:0002011	GO:0006469	GO:0009952	GO:0005515	GO:0007088	GO:0007267	GO:0003143	GO:0007155	GO:0048514	GO:0008015	GO:0009725	GO:0044297	GO:0043388	GO:0051480
	Unigene62924	9	GO:0008205	GO:0006518	GO:0043231	GO:0016715	GO:0046914	GO:0007611	GO:0007292	GO:0009792	GO:0008395
	Unigene6303	5	GO:0008354	GO:0050909	GO:0004930	GO:0023052	GO:0003006
	Unigene63045	9	GO:0031224	GO:0006810	GO:0003676	GO:0006259	GO:0019866	GO:0002164	GO:0040009	GO:0048806	GO:0009790
	Unigene63253	9	GO:0005488	GO:0002164	GO:0010876	GO:0035194	GO:0040009	GO:0040011	GO:0006897	GO:0003824	GO:0009790
	Unigene6361	3	GO:0000380	GO:0003006	GO:0043231
	Unigene6370	20	GO:0031981	GO:0000781	GO:0005515	GO:0040007	GO:0034285	GO:0009791	GO:0008406	GO:0007569	GO:0009411	GO:0043234	GO:0033683	GO:0006915	GO:0000723	GO:0007292	GO:0048232	GO:0004520	GO:0010212	GO:0002204	GO:0043566	GO:0031667
	Unigene63942	10	GO:0048869	GO:0043234	GO:0006357	GO:0006259	GO:0051259	GO:0035162	GO:0048232	GO:0005515	GO:0034728	GO:0048770
	Unigene63976	5	GO:0007411	GO:0042051	GO:0048489	GO:0030516	GO:0007154
	Unigene64101	13	GO:0030307	GO:0007155	GO:0012501	GO:0051647	GO:0008283	GO:0048732	GO:0044424	GO:0005578	GO:0030308	GO:0006935	GO:0060562	GO:0005488	GO:0016477
	Unigene64116	11	GO:0007411	GO:0004871	GO:0005515	GO:0016337	GO:0007389	GO:0016021	GO:0007154	GO:0046872	GO:0042051	GO:0030516	GO:0031345
	Unigene64154	9	GO:0051707	GO:0043234	GO:0046872	GO:0006875	GO:0005770	GO:0048232	GO:0070838	GO:0043066	GO:0044421
	Unigene64178	5	GO:0048675	GO:0003676	GO:0044444	GO:0000398	GO:0005654
	Unigene64251	11	GO:0007411	GO:0004871	GO:0005515	GO:0016337	GO:0007389	GO:0016021	GO:0007154	GO:0046872	GO:0042051	GO:0030516	GO:0031345
	Unigene6452	8	GO:0050896	GO:0007276	GO:0003676	GO:0002376	GO:0007399	GO:0048513	GO:0040011	GO:0048468
	Unigene6455	14	GO:0001934	GO:0010594	GO:0005102	GO:0060343	GO:0007178	GO:0010557	GO:0003300	GO:0055008	GO:0014855	GO:0031674	GO:0008284	GO:0016049	GO:0055013	GO:0031032
	Unigene64583	6	GO:0006468	GO:0016021	GO:0007169	GO:0019838	GO:0003006	GO:0004714
	Unigene64671	3	GO:0007613	GO:0005488	GO:0007619
	Unigene64753	3	GO:0042065	GO:0005515	GO:0007281
	Unigene64820	8	GO:0042476	GO:0045595	GO:0019953	GO:0005515	GO:0001942	GO:0008283	GO:0007178	GO:0008406
	Unigene64830	11	GO:0046914	GO:0006909	GO:0007200	GO:0016020	GO:0016028	GO:0009586	GO:0008406	GO:0032559	GO:0006464	GO:0008289	GO:0004697
	Unigene64838	8	GO:0007338	GO:0032991	GO:0016811	GO:0044237	GO:0044238	GO:0043229	GO:0048029	GO:0008233
	Unigene65117	11	GO:0015630	GO:0044297	GO:0042623	GO:0002164	GO:0007292	GO:0031332	GO:0048232	GO:0044444	GO:0035194	GO:0003724	GO:0032559
	Unigene65129	13	GO:0007097	GO:0005488	GO:0048729	GO:0002164	GO:0032155	GO:0044459	GO:0035264	GO:0010259	GO:0051301	GO:0015629	GO:0006897	GO:0048806	GO:0009790
	Unigene6523	1	GO:0008582
	Unigene65264	2	GO:0006897	GO:0040009
	Unigene65378	13	GO:0030522	GO:0043231	GO:0043234	GO:0019318	GO:0032787	GO:0010468	GO:0006664	GO:0001071	GO:0003677	GO:0048232	GO:0005515	GO:0019935	GO:0006351
	Unigene65447	25	GO:0046914	GO:0008238	GO:0005515	GO:0014909	GO:0030260	GO:0044237	GO:0008283	GO:0010720	GO:0002035	GO:0042311	GO:0042310	GO:0001816	GO:0009059	GO:0044425	GO:0006915	GO:0009056	GO:0007600	GO:0022415	GO:0009991	GO:0007631	GO:0031349	GO:0004872	GO:0044421	GO:0002237	GO:0002002
	Unigene65531	7	GO:0016811	GO:0009887	GO:0030247	GO:0060560	GO:0035151	GO:0006022	GO:0007610
	Unigene6583	7	GO:0007166	GO:0045165	GO:0048102	GO:0050789	GO:0048749	GO:0016043	GO:0030703
	Unigene66073	17	GO:0007166	GO:0007613	GO:0009124	GO:0030534	GO:0016021	GO:0010259	GO:0019935	GO:0008306	GO:0004016	GO:0007268	GO:0048588	GO:0006164	GO:0006950	GO:0007631	GO:0018988	GO:0005488	GO:0007617
	Unigene66231	6	GO:0004175	GO:0007338	GO:0032991	GO:0045762	GO:0005622	GO:0048029
	Unigene66496	19	GO:0033057	GO:0007626	GO:0042592	GO:0033555	GO:0010033	GO:0007612	GO:0006584	GO:0030534	GO:0016491	GO:0044464	GO:0048583	GO:0002118	GO:0042133	GO:0007619	GO:0007292	GO:0002376	GO:0005488	GO:0044249	GO:0040012
	Unigene66590	6	GO:0043229	GO:0048675	GO:0032991	GO:0016337	GO:0016021	GO:0007389
	Unigene66723	7	GO:0016811	GO:0009887	GO:0030247	GO:0060560	GO:0035151	GO:0006022	GO:0007610
	Unigene66865	20	GO:0005515	GO:0007163	GO:0043231	GO:0016055	GO:0051017	GO:0001752	GO:0016337	GO:0007389	GO:0051301	GO:0016021	GO:0001737	GO:0035151	GO:0023060	GO:0008104	GO:0001709	GO:0030859	GO:0048588	GO:0007431	GO:0044444	GO:0004888
	Unigene67186	8	GO:0031981	GO:0000785	GO:0043967	GO:0051099	GO:0003676	GO:0000228	GO:0043966	GO:0001832
	Unigene67382	6	GO:0007309	GO:0043231	GO:0015630	GO:0007010	GO:0044444	GO:0048193
	Unigene6772	5	GO:0043231	GO:0000375	GO:0007297	GO:0010468	GO:0006397
	Unigene68009	11	GO:0007411	GO:0004871	GO:0005515	GO:0016337	GO:0007389	GO:0016021	GO:0007154	GO:0046872	GO:0042051	GO:0030516	GO:0031345
	Unigene68031	20	GO:0001934	GO:0006351	GO:0004871	GO:0009611	GO:0007611	GO:0014823	GO:0004713	GO:0048167	GO:0016021	GO:0009986	GO:0019904	GO:0048839	GO:0032559	GO:0009628	GO:0051789	GO:0007172	GO:0008582	GO:0007271	GO:0019900	GO:0045202
	Unigene6804	11	GO:0006413	GO:0050896	GO:0008366	GO:0030695	GO:0043234	GO:0008585	GO:0008135	GO:0021782	GO:0032561	GO:0044424	GO:0032559
	Unigene68215	13	GO:0030427	GO:0005818	GO:0070161	GO:0001558	GO:0016198	GO:0008092	GO:0007420	GO:0035148	GO:0035146	GO:0001709	GO:0007019	GO:0060541	GO:0044444
	Unigene68288	7	GO:0000278	GO:0005488	GO:0015630	GO:0007308	GO:0000226	GO:0000279	GO:0044430
	Unigene68359	9	GO:0016568	GO:0030528	GO:0003002	GO:0043231	GO:0044427	GO:0046914	GO:0010468	GO:0048232	GO:0006350
	Unigene6836	19	GO:0019838	GO:0007448	GO:0045704	GO:0007178	GO:0016337	GO:0005024	GO:0005770	GO:0048870	GO:0019827	GO:0001700	GO:0048592	GO:0001709	GO:0007281	GO:0008582	GO:0030703	GO:0060541	GO:0046620	GO:0007476	GO:0016564
	Unigene68368	6	GO:0008092	GO:0030032	GO:0019094	GO:0003012	GO:0005865	GO:0048812
	Unigene68990	10	GO:0006412	GO:0003002	GO:0003729	GO:0007126	GO:0015630	GO:0005681	GO:0007267	GO:0000377	GO:0007292	GO:0044444
	Unigene69092	5	GO:0005488	GO:0016491	GO:0019861	GO:0007281	GO:0006006
	Unigene6914	9	GO:0048610	GO:0005515	GO:0048468	GO:0071844	GO:0007275	GO:0030029	GO:0003006	GO:0048477	GO:0044424
	Unigene69226	7	GO:0009790	GO:0048806	GO:0032561	GO:0005381	GO:0031224	GO:0006826	GO:0002164
	Unigene6933	21	GO:0004871	GO:0046914	GO:0016059	GO:0001541	GO:0005626	GO:0010033	GO:0031753	GO:0005543	GO:0000302	GO:0031690	GO:0003002	GO:0030425	GO:0006468	GO:0004674	GO:0032559	GO:0048522	GO:0045744	GO:0003057	GO:0044459	GO:0044444	GO:0006942
	Unigene69353	8	GO:0048869	GO:0043231	GO:0006357	GO:0051259	GO:0035162	GO:0048232	GO:0005515	GO:0034728
	Unigene69413	3	GO:0007292	GO:0006810	GO:0022892
	Unigene6945	10	GO:0034399	GO:0006357	GO:0003886	GO:0006575	GO:0006342	GO:0032776	GO:0043565	GO:0006790	GO:0048232	GO:0000790
	Unigene69488	4	GO:0030532	GO:0000380	GO:0033119	GO:0048232
	Unigene69517	20	GO:0002566	GO:0007131	GO:0017111	GO:0000019	GO:0000726	GO:0008629	GO:0030983	GO:0000288	GO:0009207	GO:0007128	GO:0032559	GO:0051255	GO:0007292	GO:0048232	GO:0007140	GO:0043073	GO:0000794	GO:0032300	GO:0002204	GO:0045143
	Unigene6961	9	GO:0007276	GO:0016790	GO:0004175	GO:0019941	GO:0000087	GO:0046332	GO:0007178	GO:0070646	GO:0044424
	Unigene69708	9	GO:0007411	GO:0016020	GO:0016337	GO:0007389	GO:0007154	GO:0042051	GO:0030516	GO:0005488	GO:0031345
	Unigene70030	7	GO:0005488	GO:0048741	GO:0045202	GO:0007010	GO:0048588	GO:0033267	GO:0016020
	Unigene70190	6	GO:0009790	GO:0040009	GO:0040025	GO:0048037	GO:0016454	GO:0008152
	Unigene70237	10	GO:0030307	GO:0005815	GO:0007409	GO:0031224	GO:0032559	GO:0006915	GO:0007019	GO:0015631	GO:0042623	GO:0000087
	Unigene71169	3	GO:0003676	GO:0019866	GO:0008406
	Unigene71207	9	GO:0031981	GO:0006351	GO:0008283	GO:0010468	GO:0001071	GO:0045927	GO:0045623	GO:0045624	GO:0003677
	Unigene71412	34	GO:0006298	GO:0030098	GO:0006091	GO:0051095	GO:0008406	GO:0032404	GO:0043009	GO:0048232	GO:0046872	GO:0009207	GO:0010259	GO:0032356	GO:0032300	GO:0019900	GO:0032139	GO:0002566	GO:0043231	GO:0032559	GO:0009411	GO:0008630	GO:0010033	GO:0032138	GO:0010212	GO:0042623	GO:0000077	GO:0043066	GO:0042802	GO:0001101	GO:0010520	GO:0002204	GO:0005694	GO:0043565	GO:0000217	GO:0051276
	Unigene71486	14	GO:0065008	GO:0005488	GO:0048741	GO:0048667	GO:0006909	GO:0030030	GO:0016628	GO:0000768	GO:0009887	GO:0030036	GO:0008152	GO:0003006	GO:0044424	GO:0016020
	Unigene71487	9	GO:0043231	GO:0003712	GO:0010468	GO:0001071	GO:0019899	GO:0003677	GO:0048232	GO:0006351	GO:0010557
	Unigene71542	18	GO:0031981	GO:0005515	GO:0032868	GO:0007417	GO:0031647	GO:0016447	GO:0003006	GO:0009952	GO:0030183	GO:0006468	GO:0004674	GO:0002681	GO:0002320	GO:0043234	GO:0010551	GO:0006915	GO:0010212	GO:0006281
	Unigene71550	12	GO:0009605	GO:0007626	GO:0006357	GO:0043231	GO:0003712	GO:0001752	GO:0051100	GO:0002118	GO:0001700	GO:0007281	GO:0048565	GO:0007476
	Unigene71558	10	GO:0005488	GO:0044297	GO:0008049	GO:0005227	GO:0042221	GO:0042995	GO:0030001	GO:0007622	GO:0005887	GO:0005267
	Unigene71566	21	GO:0032991	GO:0032989	GO:0008354	GO:0007043	GO:0045570	GO:0065008	GO:0043296	GO:0001752	GO:0045137	GO:0007635	GO:0008285	GO:0001736	GO:0001700	GO:0035088	GO:0008104	GO:0007560	GO:0002780	GO:0005488	GO:0044444	GO:0045202	GO:0007049
	Unigene7213	15	GO:0030427	GO:0005818	GO:0007267	GO:0070161	GO:0001558	GO:0016198	GO:0007420	GO:0008587	GO:0035148	GO:0035146	GO:0001709	GO:0007019	GO:0015631	GO:0060541	GO:0044444
	Unigene7224	33	GO:0031090	GO:0032868	GO:2000026	GO:0001932	GO:0004714	GO:0010828	GO:0007169	GO:0032147	GO:0005102	GO:0017046	GO:0005979	GO:0019900	GO:0042598	GO:0031328	GO:0016477	GO:0032561	GO:0032559	GO:0045927	GO:0019048	GO:0051262	GO:0005887	GO:0033500	GO:0010740	GO:0019904	GO:0006275	GO:0044424	GO:0007088	GO:0005520	GO:0008283	GO:0000165	GO:0006110	GO:0009887	GO:0006355
	Unigene72269	21	GO:0032561	GO:0007017	GO:0017111	GO:0005815	GO:0006959	GO:0032506	GO:0006906	GO:0032155	GO:0030036	GO:0044087	GO:0001700	GO:0001709	GO:0007281	GO:0007292	GO:0033206	GO:0012505	GO:0005798	GO:0033267	GO:0042051	GO:0031967	GO:0035556
	Unigene72383	8	GO:0017111	GO:0005488	GO:0043231	GO:0016049	GO:0009719	GO:0044444	GO:0050794	GO:0008283
	Unigene72614	19	GO:0006810	GO:0005929	GO:0034613	GO:0005815	GO:0032401	GO:0003006	GO:0031253	GO:0009855	GO:0007610	GO:0021543	GO:0043234	GO:0042384	GO:0009887	GO:0030154	GO:0060295	GO:0043954	GO:0035264	GO:0021544	GO:0005488
	Unigene72632	15	GO:0000278	GO:0007017	GO:0005515	GO:0043231	GO:0031647	GO:0001745	GO:0003006	GO:0015630	GO:0006587	GO:0044267	GO:0008047	GO:0008306	GO:0030291	GO:0007264	GO:0045171
	Unigene73031	13	GO:0042478	GO:0007243	GO:0008360	GO:0030695	GO:0044464	GO:0006929	GO:0007154	GO:0019827	GO:0009966	GO:0007292	GO:0007484	GO:0005488	GO:0007472
	Unigene73052	9	GO:0007411	GO:0016020	GO:0016337	GO:0007389	GO:0007154	GO:0042051	GO:0030516	GO:0005488	GO:0031345
	Unigene7315	4	GO:0009987	GO:0005488	GO:0019866	GO:0048232
	Unigene73741	13	GO:0007338	GO:0005515	GO:0005262	GO:0043231	GO:0010033	GO:0006816	GO:0032589	GO:0002118	GO:0051480	GO:0031090	GO:0007619	GO:0008289	GO:0012505
	Unigene739	6	GO:0007293	GO:0031519	GO:0048667	GO:0046914	GO:0010468	GO:0003702
	Unigene74021	16	GO:0050919	GO:0060560	GO:0021988	GO:0007411	GO:0030336	GO:0023033	GO:0051128	GO:0010033	GO:0043170	GO:0065008	GO:0043394	GO:0050922	GO:0070887	GO:0016020	GO:0005576	GO:0060562
	Unigene74420	7	GO:0006412	GO:0016070	GO:0003676	GO:0005730	GO:0002164	GO:0040009	GO:0009790
	Unigene74500	18	GO:0007423	GO:0048812	GO:0043231	GO:0006928	GO:0006355	GO:0001071	GO:0008406	GO:0050954	GO:0003702	GO:0000904	GO:0003677	GO:0001709	GO:0007292	GO:0060541	GO:0007476	GO:0048598	GO:0007049	GO:0008593
	Unigene74533	6	GO:0030154	GO:0003416	GO:0009888	GO:0048871	GO:0005578	GO:0000166
	Unigene74592	10	GO:0001743	GO:0016337	GO:0007293	GO:0050658	GO:0006935	GO:0007308	GO:0016334	GO:0050795	GO:0007621	GO:0000030
	Unigene74750	3	GO:0007292	GO:0006810	GO:0022892
	Unigene75234	9	GO:0042478	GO:0007243	GO:0008360	GO:0006929	GO:0007154	GO:0019827	GO:0007292	GO:0007484	GO:0007472
	Unigene75303	23	GO:0000278	GO:0016888	GO:0004525	GO:0033057	GO:0016246	GO:0000737	GO:0048729	GO:0050658	GO:0048812	GO:0043231	GO:0007365	GO:0002164	GO:0000267	GO:0048806	GO:0040009	GO:0031332	GO:0003676	GO:0007059	GO:0007281	GO:0022403	GO:0035196	GO:0006950	GO:0050793
	Unigene75376	8	GO:0001745	GO:0046914	GO:0003676	GO:0061061	GO:0007399	GO:0043231	GO:0012501	GO:0060180
	Unigene75491	7	GO:0008092	GO:0008154	GO:0048592	GO:0001700	GO:0015629	GO:0007409	GO:0007300
	Unigene75564	14	GO:0031410	GO:0044446	GO:0032991	GO:0031326	GO:0048029	GO:0043231	GO:0023033	GO:0022414	GO:0016787	GO:0005515	GO:0007275	GO:0048856	GO:0016020	GO:0019219
	Unigene75567	5	GO:0008238	GO:0016049	GO:0008152	GO:0048232	GO:0019212
	Unigene75577	22	GO:0032561	GO:0032991	GO:0016020	GO:0007613	GO:0007424	GO:0048168	GO:0051301	GO:0007297	GO:0007635	GO:0008049	GO:0008306	GO:0034331	GO:0030036	GO:0002009	GO:0003774	GO:0030537	GO:0015631	GO:0006950	GO:0007631	GO:0007431	GO:0043062	GO:0048488
	Unigene75619	5	GO:0045926	GO:0006631	GO:0035264	GO:0015629	GO:0008406
	Unigene76027	14	GO:0006952	GO:0030135	GO:0006903	GO:0043234	GO:0042175	GO:0016564	GO:0005768	GO:0051301	GO:0001505	GO:0042995	GO:0007281	GO:0016197	GO:0006904	GO:0035146
	Unigene76099	9	GO:0008585	GO:0042592	GO:0046872	GO:0050896	GO:0003676	GO:0005622	GO:0007281	GO:0040007	GO:0048232
	Unigene76279	9	GO:0048675	GO:0005088	GO:0007420	GO:0007010	GO:0006935	GO:0010769	GO:0016787	GO:0007266	GO:0016020
	Unigene76372	20	GO:0004871	GO:0005515	GO:0048859	GO:0016055	GO:0045570	GO:0004713	GO:0000902	GO:0008283	GO:0016337	GO:0007389	GO:0016021	GO:0016616	GO:0035151	GO:0046872	GO:0004674	GO:0006464	GO:0030859	GO:0007472	GO:0035556	GO:0048104
	Unigene76439	7	GO:0015630	GO:0051640	GO:0046530	GO:0000226	GO:0045502	GO:0003006	GO:0010970
	Unigene76480	15	GO:0060070	GO:0007369	GO:0043231	GO:0031647	GO:0070161	GO:0001944	GO:0016337	GO:0016791	GO:0019637	GO:0001932	GO:0031090	GO:0007276	GO:0043388	GO:0005488	GO:0035466
	Unigene7666	18	GO:0007423	GO:0048812	GO:0043231	GO:0006928	GO:0006355	GO:0001071	GO:0008406	GO:0050954	GO:0003702	GO:0000904	GO:0003677	GO:0001709	GO:0007292	GO:0060541	GO:0007476	GO:0048598	GO:0007049	GO:0008593
	Unigene7667	11	GO:0048869	GO:0031981	GO:0046914	GO:0010468	GO:0030518	GO:0070076	GO:0016701	GO:0048232	GO:0035258	GO:0010557	GO:0044283
	Unigene76763	8	GO:0007293	GO:0007015	GO:0035171	GO:0010259	GO:0043063	GO:0033036	GO:0035324	GO:0008306
	Unigene76787	14	GO:0007450	GO:0032583	GO:0005515	GO:0016020	GO:0016055	GO:0007365	GO:0010259	GO:0009584	GO:0001654	GO:0006915	GO:0006935	GO:0008589	GO:0046620	GO:0007476
	Unigene76819	16	GO:0009888	GO:0001751	GO:0051605	GO:0030534	GO:0007389	GO:0007173	GO:0031224	GO:0008380	GO:0001709	GO:0007292	GO:0000301	GO:0007445	GO:0046666	GO:0005488	GO:0005634	GO:0007472
	Unigene76917	20	GO:0032879	GO:0004672	GO:0043062	GO:0043232	GO:0016323	GO:0051129	GO:0030054	GO:0016477	GO:0007409	GO:0023060	GO:0000166	GO:0040008	GO:0005515	GO:0048523	GO:0048522	GO:0065008	GO:0007166	GO:0051239	GO:0006468	GO:0001944
	Unigene76957	6	GO:0007276	GO:0043073	GO:0005488	GO:0016423	GO:0008033	GO:0031981
	Unigene76972	10	GO:0030528	GO:0009888	GO:0043231	GO:0010468	GO:0000768	GO:0001071	GO:0003677	GO:0048513	GO:0045137	GO:0006351
	Unigene76993	10	GO:0043231	GO:0000377	GO:0042623	GO:0002164	GO:0006897	GO:0030529	GO:0009653	GO:0032559	GO:0009790	GO:0040021
	Unigene77221	17	GO:0030427	GO:0005818	GO:0007267	GO:0070161	GO:0001558	GO:0016198	GO:0046872	GO:0007420	GO:0008587	GO:0035148	GO:0035146	GO:0022402	GO:0001709	GO:0007019	GO:0015631	GO:0060541	GO:0044444
	Unigene77406	5	GO:0007411	GO:0042051	GO:0048489	GO:0030516	GO:0007154
	Unigene77422	10	GO:0017111	GO:0035556	GO:0043231	GO:0016049	GO:0009719	GO:0001883	GO:0032561	GO:0044444	GO:0035258	GO:0008283
	Unigene77424	11	GO:0016607	GO:0006412	GO:0044427	GO:0000956	GO:0005681	GO:0019094	GO:0000380	GO:0016477	GO:0007293	GO:0006405	GO:0003729
Growth related genes	Unigene77516	9	GO:0051707	GO:0043234	GO:0046872	GO:0006875	GO:0005770	GO:0048232	GO:0070838	GO:0043066	GO:0044421
	Unigene77592	11	GO:0015630	GO:0044297	GO:0042623	GO:0002164	GO:0007292	GO:0031332	GO:0048232	GO:0044444	GO:0035194	GO:0003724	GO:0032559
	Unigene77611	11	GO:0043231	GO:0043234	GO:0006357	GO:0000981	GO:0016564	GO:0043565	GO:0048812	GO:0005515	GO:0003006	GO:0003702	GO:0043566
	Unigene77618	20	GO:0016125	GO:0030169	GO:0043231	GO:0002164	GO:0030228	GO:0010259	GO:0040009	GO:0042157	GO:0048870	GO:0007169	GO:0005578	GO:0044425	GO:0009790	GO:0006897	GO:0009887	GO:0010927	GO:0018988	GO:0005886	GO:0055092	GO:0015918
	Unigene77742	7	GO:0043231	GO:0044238	GO:0044260	GO:0046872	GO:0019866	GO:0016874	GO:0048232
	Unigene77779	11	GO:0031224	GO:0007276	GO:0006024	GO:0007224	GO:0015020	GO:0005488	GO:0006041	GO:0015012	GO:0007178	GO:0005789	GO:0008375
	Unigene77830	12	GO:0031981	GO:0000785	GO:0000166	GO:0006357	GO:0016055	GO:0016585	GO:0060746	GO:0006461	GO:0008283	GO:0019904	GO:0043565	GO:0003723
	Unigene77882	10	GO:0007043	GO:0007164	GO:0030136	GO:0035264	GO:0030036	GO:0008361	GO:0016740	GO:0051234	GO:0002009	GO:0001703
	Unigene77955	5	GO:0004175	GO:0007338	GO:0016023	GO:0045762	GO:0048029
	Unigene77980	15	GO:0007166	GO:0032991	GO:0005102	GO:0007542	GO:0007444	GO:0006412	GO:0006310	GO:0030371	GO:0033119	GO:0000398	GO:0007292	GO:0008187	GO:0018993	GO:0040029	GO:0003729
	Unigene78024	4	GO:0009987	GO:0005488	GO:0019866	GO:0048232
	Unigene78028	12	GO:0014706	GO:0051647	GO:0048870	GO:0008092	GO:0030036	GO:0031674	GO:0005856	GO:0012505	GO:0007300	GO:0005887	GO:0044249	GO:0009117
	Unigene78189	3	GO:0040009	GO:0008081	GO:0023052
	Unigene78217	22	GO:0030528	GO:0060089	GO:0043231	GO:0006357	GO:0033500	GO:0019861	GO:0001667	GO:0014823	GO:0001071	GO:0045639	GO:0003676	GO:0030947	GO:0040008	GO:0003143	GO:0023060	GO:0006915	GO:0032787	GO:0020027	GO:0030005	GO:0048646	GO:0034599	GO:0001701
	Unigene78398	10	GO:0005488	GO:0044297	GO:0008049	GO:0005227	GO:0042221	GO:0042995	GO:0030001	GO:0007622	GO:0005887	GO:0005267
	Unigene78508	22	GO:0051704	GO:0007270	GO:0032879	GO:0050804	GO:0016705	GO:0005506	GO:0016209	GO:0048519	GO:0031328	GO:0031347	GO:0022414	GO:0042127	GO:0009605	GO:0001516	GO:0001819	GO:0044425	GO:0048545	GO:0008015	GO:0007275	GO:0002042	GO:0001660	GO:0044432
	Unigene78593	2	GO:0009987	GO:0008406
	Unigene7860	17	GO:0030427	GO:0005818	GO:0007267	GO:0070161	GO:0001558	GO:0016198	GO:0046872	GO:0007420	GO:0008587	GO:0035148	GO:0035146	GO:0022402	GO:0001709	GO:0007019	GO:0015631	GO:0060541	GO:0044444
	Unigene78705	13	GO:0042478	GO:0007243	GO:0008360	GO:0030695	GO:0044464	GO:0006929	GO:0007154	GO:0019827	GO:0009966	GO:0007292	GO:0007484	GO:0005488	GO:0007472
	Unigene78884	21	GO:0032583	GO:0005515	GO:0001656	GO:0043231	GO:0006357	GO:0001667	GO:0060600	GO:0000981	GO:0048675	GO:0003702	GO:0007420	GO:0043565	GO:0043234	GO:0050931	GO:0048754	GO:0072130	GO:0001825	GO:0043566	GO:0030509	GO:0016564	GO:0021782
	Unigene78916	6	GO:0005624	GO:0007155	GO:0012505	GO:0007281	GO:0030141	GO:0016020
	Unigene78959	14	GO:0005515	GO:0048859	GO:0016020	GO:0007155	GO:0035265	GO:0000902	GO:0008283	GO:0035151	GO:0040008	GO:0006464	GO:0030859	GO:0007472	GO:0035556	GO:0048104
	Unigene79278	15	GO:0016246	GO:0043231	GO:0051276	GO:0065001	GO:0044087	GO:0019094	GO:0004386	GO:0006306	GO:0034660	GO:0007126	GO:0043186	GO:0048232	GO:0042623	GO:0005488	GO:0007293
	Unigene7930	13	GO:0046914	GO:0001751	GO:0051707	GO:0001071	GO:0003676	GO:0055002	GO:0005622	GO:0035071	GO:0007292	GO:0035112	GO:0044248	GO:0016564	GO:0050793
	Unigene7939	14	GO:0030832	GO:0051017	GO:0004713	GO:0051276	GO:0008306	GO:0007420	GO:0006468	GO:0001700	GO:0032559	GO:0045171	GO:0007431	GO:0007300	GO:0007293	GO:0000165
	Unigene79452	4	GO:0046872	GO:0031980	GO:0051604	GO:0003824
	Unigene79486	5	GO:0048638	GO:0008593	GO:0030136	GO:0001505	GO:0006897
	Unigene79515	25	GO:0033036	GO:0008544	GO:0005515	GO:0031638	GO:0046546	GO:0043231	GO:0006516	GO:0003823	GO:0005626	GO:0006694	GO:0008283	GO:0008203	GO:0043523	GO:0030554	GO:0007264	GO:0044425	GO:0031090	GO:0022402	GO:0006950	GO:0012505	GO:0043232	GO:0016628	GO:0044444	GO:0043066	GO:0010466
	Unigene79534	29	GO:0048675	GO:0004871	GO:0006915	GO:0008284	GO:0007405	GO:0043009	GO:0048232	GO:0001667	GO:0051100	GO:0001503	GO:0042476	GO:0021545	GO:0042995	GO:0010551	GO:0031099	GO:0006606	GO:0042221	GO:0000122	GO:0044424	GO:0009953	GO:0045165	GO:0007267	GO:0007417	GO:0006950	GO:0009855	GO:0031647	GO:0044297	GO:0016020	GO:0008589
	Unigene79681	7	GO:0031981	GO:0003006	GO:0010975	GO:0005527	GO:0005737	GO:0008092	GO:0031109
	Unigene79877	10	GO:0006412	GO:0003002	GO:0003729	GO:0007126	GO:0015630	GO:0005681	GO:0007267	GO:0000377	GO:0007292	GO:0044444
	Unigene79925	7	GO:0007411	GO:0016020	GO:0016337	GO:0010975	GO:0010769	GO:0048675	GO:0042051
	Unigene79998	22	GO:0032583	GO:0006357	GO:0043231	GO:0003712	GO:0008283	GO:0051100	GO:0000981	GO:0032897	GO:0046983	GO:0000079	GO:0042802	GO:0065003	GO:0043234	GO:0000084	GO:0006915	GO:0030330	GO:0010948	GO:0010843	GO:0019899	GO:0051414	GO:0043921	GO:0016564
	Unigene80180	7	GO:0009790	GO:0009653	GO:0040021	GO:0017111	GO:0002164	GO:0000166	GO:0006897
	Unigene80361	5	GO:0043231	GO:0001832	GO:0006915	GO:0034472	GO:0010466
	Unigene80634	41	GO:0035110	GO:0001752	GO:0007309	GO:0000380	GO:0008595	GO:0031224	GO:0006357	GO:0007346	GO:0032991	GO:0045168	GO:0051301	GO:0030528	GO:0046666	GO:0070161	GO:0005102	GO:0002682	GO:0001071	GO:0000904	GO:0016023	GO:0048666	GO:0019955	GO:0003677	GO:0060541	GO:0001703	GO:0009996	GO:0007297	GO:0045202	GO:0008587	GO:0007450	GO:0007417	GO:0008283	GO:0007166	GO:0001736	GO:0007293	GO:0030036	GO:0006950	GO:0042675	GO:0019827	GO:0007478	GO:0042386	GO:0010721
	Unigene80681	35	GO:0031410	GO:0007186	GO:0048468	GO:0050804	GO:0007006	GO:0031981	GO:0043005	GO:0071696	GO:0007423	GO:0048232	GO:0006520	GO:0030072	GO:0042391	GO:0001707	GO:0010259	GO:0006090	GO:0008144	GO:0010970	GO:0031547	GO:0007612	GO:0021544	GO:0006605	GO:0043066	GO:0051705	GO:0021953	GO:0000267	GO:0010038	GO:0019627	GO:0048193	GO:0046394	GO:0030005	GO:0003002	GO:0007632	GO:0015813	GO:0001839
	Unigene80772	24	GO:0048699	GO:0007162	GO:0030528	GO:0003176	GO:0045661	GO:0009790	GO:0022402	GO:0032583	GO:0009653	GO:0046578	GO:0045596	GO:0060429	GO:0043231	GO:0008544	GO:0022414	GO:0040007	GO:0016021	GO:0043066	GO:0002376	GO:0043068	GO:0045165	GO:0008283	GO:0007166	GO:0005488
	Unigene80848	16	GO:0048731	GO:0043231	GO:0004563	GO:0019953	GO:0043167	GO:0046983	GO:0023052	GO:0007610	GO:0005975	GO:0006687	GO:0042802	GO:0050877	GO:0048609	GO:0043170	GO:0006873	GO:0044444
	Unigene80960	8	GO:0046914	GO:0019899	GO:0043409	GO:0016567	GO:0048232	GO:0007005	GO:0019787	GO:0006950
	Unigene81236	27	GO:0001525	GO:0043542	GO:0043231	GO:0042246	GO:0008629	GO:0006639	GO:0000267	GO:0042743	GO:0008283	GO:0048747	GO:0033194	GO:0000302	GO:0002437	GO:0016705	GO:0004601	GO:0050954	GO:0006790	GO:0010740	GO:0042277	GO:0006464	GO:0010212	GO:0050880	GO:0003015	GO:0009608	GO:0002064	GO:0044419	GO:0048871
	Unigene81383	8	GO:0003723	GO:0015630	GO:0005681	GO:0000377	GO:0045069	GO:0006397	GO:0034518	GO:0016246
	Unigene81431	9	GO:0005488	GO:0007293	GO:0007015	GO:0035171	GO:0010259	GO:0043063	GO:0033036	GO:0035324	GO:0008306
	Unigene81443	12	GO:0048731	GO:0030307	GO:0046914	GO:0007265	GO:0043231	GO:0051017	GO:0004672	GO:0046983	GO:0005924	GO:0032559	GO:0042995	GO:0031397
	Unigene81564	4	GO:0006897	GO:0040009	GO:0002164	GO:0009790
	Unigene81654	9	GO:0044255	GO:0044464	GO:0019953	GO:0004553	GO:0005975	GO:0050877	GO:0048609	GO:0065007	GO:0005488
	Unigene81670	17	GO:0016020	GO:0007417	GO:0000166	GO:0065008	GO:0007052	GO:0006959	GO:0048534	GO:0007297	GO:0007169	GO:0030036	GO:0030030	GO:0006464	GO:0004714	GO:0033554	GO:0007431	GO:0002682	GO:0048598
	Unigene81875	4	GO:0007417	GO:0046914	GO:0043231	GO:0040008
	Unigene82067	5	GO:0016859	GO:0000377	GO:0046662	GO:0005681	GO:0044267
	Unigene82095	14	GO:0032991	GO:0005515	GO:0009062	GO:0016558	GO:0000268	GO:0021953	GO:0021987	GO:0051259	GO:0006720	GO:0050877	GO:0007005	GO:0044439	GO:0035264	GO:0016477
	Unigene82605	7	GO:0065008	GO:0032991	GO:0007293	GO:0045807	GO:0007297	GO:0043232	GO:0005515
	Unigene83626	7	GO:0009209	GO:0016776	GO:0009206	GO:0048232	GO:0007281	GO:0043066	GO:0032559
	Unigene83655	8	GO:0006396	GO:0003729	GO:0031981	GO:0032897	GO:0001071	GO:0048255	GO:0006351	GO:0043566
	Unigene83716	8	GO:0031980	GO:0046692	GO:0006103	GO:0006734	GO:0045333	GO:0006519	GO:0005515	GO:0016639
	Unigene83854	13	GO:0019087	GO:0002069	GO:0040007	GO:0016597	GO:0000267	GO:0017085	GO:0006259	GO:0009177	GO:0006730	GO:0009887	GO:0031960	GO:0042083	GO:0019932
	Unigene83930	1	GO:0048232
	Unigene83989	34	GO:0006022	GO:0003018	GO:0035272	GO:0005515	GO:0048771	GO:0007417	GO:0043231	GO:0001822	GO:0006357	GO:0030198	GO:0009952	GO:0042476	GO:0008585	GO:0000981	GO:0043009	GO:0007169	GO:0055008	GO:0014855	GO:0003702	GO:0014031	GO:0040008	GO:0001654	GO:0043565	GO:0043234	GO:0001945	GO:0035295	GO:0007276	GO:0048514	GO:0001710	GO:0003682	GO:0007346	GO:0043566	GO:0043066	GO:0016564
	Unigene83996	11	GO:0030371	GO:0003723	GO:0032991	GO:0043231	GO:0000245	GO:0035264	GO:0005515	GO:0035194	GO:0000267	GO:0007281	GO:0007275
	Unigene84020	9	GO:0046872	GO:0003724	GO:0003676	GO:0051726	GO:0003006	GO:0044464	GO:0048513	GO:0048232	GO:0032559
	Unigene84706	18	GO:0031981	GO:0005515	GO:0032868	GO:0007417	GO:0031647	GO:0016447	GO:0003006	GO:0009952	GO:0030183	GO:0006468	GO:0004674	GO:0002681	GO:0002320	GO:0043234	GO:0010551	GO:0006915	GO:0010212	GO:0006281
	Unigene84714	8	GO:0031224	GO:0043484	GO:0005488	GO:0043231	GO:0007297	GO:0000380	GO:0040029	GO:0007538
	Unigene84857	9	GO:0031224	GO:0006810	GO:0003676	GO:0006259	GO:0019866	GO:0002164	GO:0040009	GO:0048806	GO:0009790
	Unigene84866	8	GO:0007265	GO:0048675	GO:0005088	GO:0007420	GO:0007010	GO:0006935	GO:0010769	GO:0016020
	Unigene84876	9	GO:0007276	GO:0043169	GO:0044297	GO:0007052	GO:0015934	GO:0006720	GO:0005198	GO:0004659	GO:0009790
	Unigene84907	4	GO:0035264	GO:0046914	GO:0010212	GO:0007165
	Unigene84930	37	GO:0006461	GO:0031325	GO:0006281	GO:0003690	GO:0030528	GO:0034399	GO:0043232	GO:0016049	GO:0001071	GO:0007005	GO:0019900	GO:0032559	GO:0006919	GO:0008630	GO:0016604	GO:0010551	GO:0007568	GO:0006984	GO:0010212	GO:0000077	GO:0030330	GO:0007264	GO:0005667	GO:0009267	GO:0030154	GO:0000267	GO:0008283	GO:0019903	GO:0045934	GO:0043565	GO:0046914	GO:2000113	GO:0046983	GO:0033036	GO:0044444	GO:0010604	GO:0048731
	Unigene84955	10	GO:0016192	GO:0017111	GO:0003002	GO:0046872	GO:0007476	GO:0006811	GO:0007292	GO:0032561	GO:0003006	GO:0015075
	Unigene850	13	GO:0043231	GO:0010970	GO:0003777	GO:0044087	GO:0019094	GO:0032559	GO:0006935	GO:0046530	GO:0007005	GO:0005875	GO:0015631	GO:0001505	GO:0007300
	Unigene8507	22	GO:0044456	GO:0031981	GO:0043005	GO:0006941	GO:0048741	GO:0007267	GO:0005515	GO:0007613	GO:0060491	GO:0008283	GO:0030139	GO:0042383	GO:0006468	GO:0004674	GO:0032559	GO:0043234	GO:0007619	GO:0070838	GO:0006950	GO:0016049	GO:0000086	GO:0006875
	Unigene85114	14	GO:0005515	GO:0007275	GO:0006357	GO:0043231	GO:0000981	GO:0046872	GO:0003702	GO:0048856	GO:0051726	GO:0043565	GO:0043234	GO:0016049	GO:0043566	GO:0016564
	Unigene85172	28	GO:0001935	GO:0004672	GO:0005978	GO:0043005	GO:0043434	GO:0003006	GO:0032094	GO:0043234	GO:0043231	GO:0032559	GO:0001934	GO:0009758	GO:0043549	GO:0010740	GO:0010591	GO:0010507	GO:0005515	GO:0008361	GO:0001101	GO:0000267	GO:0032233	GO:0030041	GO:0006412	GO:0044444	GO:0032319	GO:0006635	GO:0048856	GO:0044297
	Unigene85222	7	GO:0007411	GO:0005488	GO:0007297	GO:0005622	GO:0048513	GO:0007033	GO:0006914
	Unigene85356	13	GO:0032991	GO:0005515	GO:0009062	GO:0000268	GO:0021953	GO:0021987	GO:0006720	GO:0050877	GO:0007005	GO:0044439	GO:0035264	GO:0006625	GO:0016477
	Unigene85421	5	GO:0043231	GO:0042393	GO:0016458	GO:0007292	GO:0007444
	Unigene85441	15	GO:0048741	GO:0048638	GO:0005515	GO:0010467	GO:0004672	GO:0051239	GO:0050896	GO:0007169	GO:0006468	GO:0048522	GO:0007268	GO:0044459	GO:0071844	GO:0060255	GO:0031012
	Unigene85476	9	GO:0031224	GO:0043169	GO:0016049	GO:0006796	GO:0008238	GO:0048232	GO:0019212	GO:0004721	GO:0006464
	Unigene85495	6	GO:0043231	GO:0045449	GO:0003677	GO:0005515	GO:0007275	GO:0003006
	Unigene85562	4	GO:0035264	GO:0005083	GO:0044464	GO:0032011
	Unigene85576	11	GO:0006412	GO:0017111	GO:0035556	GO:0016049	GO:0004620	GO:0022402	GO:0042254	GO:0032561	GO:0007444	GO:0044464	GO:0006950
	Unigene85598	5	GO:0007338	GO:0016787	GO:0044238	GO:0009987	GO:0005488
	Unigene85892	4	GO:0000165	GO:0043231	GO:0003006	GO:0040007
	Unigene8598	10	GO:0005488	GO:0044297	GO:0008049	GO:0005227	GO:0042221	GO:0042995	GO:0030001	GO:0007622	GO:0005887	GO:0005267
	Unigene8600	22	GO:0009653	GO:0009888	GO:0070696	GO:0007179	GO:0045597	GO:0050796	GO:0001503	GO:0009855	GO:0044424	GO:0043434	GO:0031224	GO:0001654	GO:0032559	GO:0006915	GO:0016043	GO:0043235	GO:0009746	GO:0001832	GO:0032403	GO:0042698	GO:0010876	GO:0005025
	Unigene8609	15	GO:0009880	GO:0005700	GO:0006476	GO:0016458	GO:0016811	GO:0048812	GO:0003712	GO:0010259	GO:0048513	GO:0022900	GO:0006350	GO:0007292	GO:0070822	GO:0009060	GO:0031519
	Unigene8643	5	GO:0016772	GO:0009209	GO:0000166	GO:0007281	GO:0043066
	Unigene86641	9	GO:0007411	GO:0016020	GO:0016337	GO:0007389	GO:0007154	GO:0042051	GO:0030516	GO:0005488	GO:0031345
	Unigene86644	5	GO:0005737	GO:0003723	GO:0005515	GO:0003006	GO:0015630
	Unigene8674	10	GO:0008038	GO:0048675	GO:0043005	GO:0044297	GO:0007420	GO:0006935	GO:0042802	GO:0006897	GO:0043498	GO:0004888
	Unigene86789	17	GO:0000819	GO:0045596	GO:0000166	GO:0043231	GO:0030832	GO:0005626	GO:0004672	GO:0044297	GO:0051301	GO:0006796	GO:0031175	GO:0031252	GO:0017016	GO:0007067	GO:0005856	GO:0048232	GO:0031345
	Unigene86932	17	GO:0000785	GO:0032561	GO:0046914	GO:0017111	GO:0043231	GO:0018024	GO:0006412	GO:0042078	GO:0006305	GO:0006342	GO:0043234	GO:0008135	GO:0006338	GO:0007292	GO:0070828	GO:0034968	GO:0044444
	Unigene87004	19	GO:0006810	GO:0006261	GO:0016020	GO:0004672	GO:0051276	GO:0010259	GO:0008064	GO:0044424	GO:0046958	GO:0001700	GO:0032559	GO:0045171	GO:0006464	GO:0007431	GO:0060541	GO:0007484	GO:0007293	GO:0000165	GO:0007617
	Unigene87050	11	GO:0017111	GO:0043231	GO:0015630	GO:0003676	GO:0044427	GO:0009880	GO:0007297	GO:0006935	GO:0006959	GO:0006325	GO:0032559
	Unigene87074	18	GO:0016477	GO:0017111	GO:0035556	GO:0018988	GO:0043231	GO:0016763	GO:0060089	GO:0002164	GO:0001505	GO:0032561	GO:0040009	GO:0006897	GO:0009653	GO:0007166	GO:0015031	GO:0048806	GO:0009790	GO:0006464
	Unigene87206	9	GO:0050896	GO:0043231	GO:0003712	GO:0006357	GO:0003012	GO:0043232	GO:0005102	GO:0044423	GO:0019063
	Unigene87239	5	GO:0008092	GO:0007315	GO:0030036	GO:0005737	GO:0006403
	Unigene87254	22	GO:0032561	GO:0032991	GO:0016020	GO:0007613	GO:0007424	GO:0048168	GO:0051301	GO:0007297	GO:0007635	GO:0008049	GO:0008306	GO:0034331	GO:0030036	GO:0002009	GO:0003774	GO:0030537	GO:0015631	GO:0006950	GO:0007631	GO:0007431	GO:0043062	GO:0048488
	Unigene8726	5	GO:0007315	GO:0005737	GO:0006403	GO:0008092	GO:0030036
	Unigene87401	22	GO:0006351	GO:0006909	GO:0044448	GO:0016020	GO:0007417	GO:0043231	GO:0014017	GO:0007409	GO:0001752	GO:0015630	GO:0010468	GO:0007405	GO:0001071	GO:0051301	GO:0003676	GO:0050767	GO:0042675	GO:0001709	GO:0006935	GO:0016564	GO:0007606	GO:0007617
	Unigene87528	7	GO:0003012	GO:0030032	GO:0048812	GO:0005865	GO:0008092	GO:0019094	GO:0007015
	Unigene88125	18	GO:0009605	GO:0007626	GO:0008360	GO:0016458	GO:0048812	GO:0007424	GO:0060560	GO:0003006	GO:0006355	GO:0035150	GO:0002118	GO:0005694	GO:0042802	GO:0035146	GO:0042335	GO:0007431	GO:0042051	GO:0016564
	Unigene88169	13	GO:0032991	GO:0007260	GO:0043231	GO:0065008	GO:0008283	GO:0007297	GO:0005737	GO:0019904	GO:0030099	GO:0009719	GO:0045807	GO:0043232	GO:0007293
	Unigene88185	20	GO:0007010	GO:0048037	GO:0060089	GO:0007409	GO:0051647	GO:0045926	GO:0001944	GO:0004713	GO:0031252	GO:0007169	GO:0005924	GO:0019904	GO:0006468	GO:0032559	GO:0043232	GO:0048646	GO:0043062	GO:0031345	GO:0044444	GO:0016477
	Unigene88190	10	GO:0042802	GO:0008104	GO:0000323	GO:0051704	GO:0032561	GO:0046983	GO:0019835	GO:0010942	GO:0022415	GO:0012501
	Unigene88215	12	GO:0030032	GO:0008154	GO:0015630	GO:0008406	GO:0007297	GO:0008092	GO:0001736	GO:0035110	GO:0048667	GO:0007420	GO:0000912	GO:0001654
	Unigene88220	6	GO:0008187	GO:0005681	GO:0007049	GO:0000380	GO:0000245	GO:0007281
	Unigene88227	13	GO:0008360	GO:0030695	GO:0040023	GO:0009886	GO:0001700	GO:0032559	GO:0006935	GO:0007292	GO:0006464	GO:0001738	GO:0044444	GO:0008349	GO:0000165
	Unigene88544	49	GO:0021766	GO:0010466	GO:0004869	GO:0016202	GO:0070670	GO:0007178	GO:0031981	GO:0030851	GO:0008284	GO:0010557	GO:0048732	GO:0007162	GO:0042113	GO:0032091	GO:0007423	GO:0035258	GO:0043234	GO:0016337	GO:0001707	GO:0003707	GO:0016049	GO:0001503	GO:0042093	GO:0001837	GO:0016477	GO:0045596	GO:0042476	GO:0008544	GO:0012502	GO:0044212	GO:0006935	GO:0010551	GO:0021872	GO:0007606	GO:0030178	GO:0043066	GO:0019904	GO:0009952	GO:0010038	GO:0016573	GO:0010564	GO:0035108	GO:0043565	GO:0002681	GO:0002763	GO:0003702	GO:0000981
	Unigene88666	6	GO:0008092	GO:0032991	GO:0046914	GO:0007317	GO:0005924	GO:0048232
	Unigene88685	12	GO:0030528	GO:0001751	GO:0009605	GO:0007626	GO:0043231	GO:0006357	GO:0051100	GO:0002118	GO:0001700	GO:0007281	GO:0048565	GO:0007476
	Unigene88702	10	GO:0016079	GO:0043231	GO:0006909	GO:0048592	GO:0033267	GO:0051301	GO:0060560	GO:0044425	GO:0048193	GO:0015031
	Unigene88751	15	GO:0000278	GO:0016458	GO:0034399	GO:0003006	GO:0015630	GO:0040023	GO:0005882	GO:0048592	GO:0006997	GO:0042335	GO:0060446	GO:0012505	GO:0007399	GO:0005488	GO:0044444
	Unigene88819	24	GO:0005515	GO:0008354	GO:0048812	GO:0006412	GO:0007143	GO:0006355	GO:0045165	GO:0008283	GO:0030554	GO:0005737	GO:0031124	GO:0048513	GO:0044271	GO:0019827	GO:0040008	GO:0005506	GO:0007309	GO:0006915	GO:0016709	GO:0000578	GO:0048232	GO:0003723	GO:0006950	GO:0006260
	Unigene88855	9	GO:0043234	GO:0000794	GO:0031981	GO:0000775	GO:0000785	GO:0048232	GO:0007281	GO:0044430	GO:0007140
	Unigene88887	22	GO:0032561	GO:0032991	GO:0016020	GO:0007613	GO:0007424	GO:0048168	GO:0051301	GO:0007297	GO:0007635	GO:0008049	GO:0008306	GO:0034331	GO:0030036	GO:0002009	GO:0003774	GO:0030537	GO:0015631	GO:0006950	GO:0007631	GO:0007431	GO:0043062	GO:0048488
	Unigene88897	3	GO:0009987	GO:0003677	GO:0003006
	Unigene8945	6	GO:0009790	GO:0005488	GO:0010796	GO:0007010	GO:0003006	GO:0001654
	Unigene89688	5	GO:0005622	GO:0003677	GO:0050794	GO:0003006	GO:0006350
	Unigene89756	21	GO:0005515	GO:0000726	GO:0010720	GO:0043009	GO:0003676	GO:0019827	GO:0003909	GO:0006996	GO:0008284	GO:0005694	GO:0044428	GO:0006266	GO:0002681	GO:0002320	GO:0032559	GO:0043234	GO:0019058	GO:0010212	GO:0007399	GO:0002204	GO:0043066
	Unigene89811	15	GO:0007155	GO:0043231	GO:0016044	GO:0007269	GO:0016198	GO:0008283	GO:0046872	GO:0007015	GO:0007019	GO:0015631	GO:0008582	GO:0030864	GO:0044459	GO:0007293	GO:0045202
	Unigene89916	7	GO:0007411	GO:0016020	GO:0016337	GO:0010975	GO:0010769	GO:0048675	GO:0042051
	Unigene89930	9	GO:0006310	GO:0006281	GO:0043073	GO:0007143	GO:0005515	GO:0000166	GO:0007281	GO:0007128	GO:0007140
	Unigene89979	11	GO:0008092	GO:0044248	GO:0009968	GO:0016049	GO:0007416	GO:0004672	GO:0007552	GO:0051969	GO:0032559	GO:0010970	GO:0006464
	Unigene90000	13	GO:0008360	GO:0030695	GO:0040023	GO:0009886	GO:0001700	GO:0032559	GO:0006935	GO:0007292	GO:0006464	GO:0001738	GO:0044444	GO:0008349	GO:0000165
	Unigene90026	14	GO:0031981	GO:0032561	GO:0007548	GO:0030426	GO:0030518	GO:0010975	GO:0001655	GO:0008092	GO:0031109	GO:0032559	GO:0035258	GO:0043623	GO:0000041	GO:0044444
	Unigene90250	10	GO:0007338	GO:0032991	GO:0016811	GO:0043231	GO:0044281	GO:0048029	GO:0043170	GO:0008233	GO:0019219	GO:0031326
	Unigene90293	6	GO:0009987	GO:0070011	GO:0044238	GO:0048029	GO:0005622	GO:0007338
	Unigene90345	16	GO:0006810	GO:0007179	GO:0005024	GO:0016021	GO:0030036	GO:0019827	GO:0048592	GO:0032559	GO:0008595	GO:0007281	GO:0006464	GO:0008582	GO:0007447	GO:0030703	GO:0030509	GO:0007472
	Unigene90389	7	GO:0007276	GO:0003723	GO:0044238	GO:0044260	GO:0010468	GO:0030154	GO:0030529
	Unigene90430	3	GO:0008380	GO:0032501	GO:0003006
	Unigene90439	8	GO:0007293	GO:0007015	GO:0035171	GO:0010259	GO:0043063	GO:0033036	GO:0035324	GO:0008306
	Unigene90504	7	GO:0031966	GO:0007450	GO:0016462	GO:0000166	GO:0007033	GO:0007281	GO:0006914
	Unigene90508	14	GO:0007450	GO:0007017	GO:0005515	GO:0043231	GO:0003006	GO:0007612	GO:0015630	GO:0010259	GO:0040008	GO:0007264	GO:0007067	GO:0045171	GO:0009416	GO:0031570
	Unigene90530	22	GO:0035091	GO:0000278	GO:0044448	GO:0032991	GO:0010004	GO:0007043	GO:0043296	GO:0005913	GO:0006605	GO:0045165	GO:0016337	GO:0051301	GO:0007297	GO:0008105	GO:0002009	GO:0035088	GO:0065003	GO:0007309	GO:0007186	GO:0030010	GO:0043232	GO:0007399
	Unigene9058	8	GO:0007265	GO:0048675	GO:0005088	GO:0007420	GO:0007010	GO:0006935	GO:0010769	GO:0016020
	Unigene90733	6	GO:0009987	GO:0005488	GO:0005622	GO:0019953	GO:0032501	GO:0022414
	Unigene90749	10	GO:0005488	GO:0044297	GO:0008049	GO:0005227	GO:0042221	GO:0042995	GO:0030001	GO:0007622	GO:0005887	GO:0005267
	Unigene90754	8	GO:0006351	GO:0030307	GO:0046914	GO:0043231	GO:0010468	GO:0001071	GO:0003677	GO:0006935
	Unigene90757	11	GO:0000785	GO:0035521	GO:0016458	GO:0019783	GO:0008283	GO:0016790	GO:0019941	GO:0016049	GO:0031519	GO:0005488	GO:0007049
	Unigene90768	4	GO:0009987	GO:0043231	GO:0032501	GO:0007338
	Unigene90858	13	GO:0043231	GO:0010970	GO:0003777	GO:0044087	GO:0019094	GO:0032559	GO:0006935	GO:0046530	GO:0007005	GO:0005875	GO:0015631	GO:0001505	GO:0007300
	Unigene90876	14	GO:0006952	GO:0030135	GO:0006903	GO:0043234	GO:0042175	GO:0016564	GO:0005768	GO:0051301	GO:0001505	GO:0042995	GO:0007281	GO:0016197	GO:0006904	GO:0035146
	Unigene90915	13	GO:0043231	GO:0010970	GO:0003777	GO:0044087	GO:0019094	GO:0032559	GO:0006935	GO:0046530	GO:0007005	GO:0005875	GO:0015631	GO:0001505	GO:0007300
	Unigene90923	22	GO:0032561	GO:0032991	GO:0016020	GO:0007613	GO:0007424	GO:0048168	GO:0051301	GO:0007297	GO:0007635	GO:0008049	GO:0008306	GO:0034331	GO:0030036	GO:0002009	GO:0003774	GO:0030537	GO:0015631	GO:0006950	GO:0007631	GO:0007431	GO:0043062	GO:0048488
	Unigene9095	7	GO:0035264	GO:0006629	GO:0005768	GO:0019538	GO:0004672	GO:0006775	GO:0070011
	Unigene90979	11	GO:0046914	GO:0060089	GO:0043231	GO:0001752	GO:0008283	GO:0007297	GO:0007176	GO:0003824	GO:0044444	GO:0007472	GO:0019538
	Unigene90991	8	GO:0005515	GO:0043231	GO:0006915	GO:0007090	GO:0006935	GO:0016049	GO:0043062	GO:0016477
	Unigene91021	13	GO:0034399	GO:0040007	GO:0010557	GO:0006355	GO:0015630	GO:0006259	GO:0043189	GO:0004386	GO:0035097	GO:0032559	GO:0048232	GO:0000087	GO:0016573
	Unigene9104	8	GO:0007417	GO:0007043	GO:0005488	GO:0044459	GO:0021782	GO:0008283	GO:0006950	GO:0007338
	Unigene91147	12	GO:0008092	GO:0031023	GO:0043169	GO:0007293	GO:0048134	GO:0007015	GO:0043232	GO:0007283	GO:0007051	GO:0044444	GO:0035324	GO:0016020
	Unigene91157	23	GO:0006354	GO:0016301	GO:0003712	GO:0004468	GO:0031330	GO:0070461	GO:0005667	GO:0004386	GO:0034097	GO:0035097	GO:0019904	GO:0016604	GO:0032559	GO:0043565	GO:0010551	GO:0006915	GO:0006352	GO:0033554	GO:0016049	GO:0048584	GO:0016776	GO:0030529	GO:0016573
	Unigene91297	5	GO:0044459	GO:0003006	GO:0009987	GO:0016021	GO:0042995
	Unigene91362	5	GO:0009987	GO:0043231	GO:0031982	GO:0044444	GO:0022414
	Unigene91372	7	GO:0007275	GO:0003006	GO:0005737	GO:0030154	GO:0007276	GO:0043229	GO:0043170
	Unigene91374	2	GO:0031224	GO:0048232
	Unigene91379	15	GO:0040008	GO:0012501	GO:0043234	GO:0023060	GO:0001894	GO:0019207	GO:0023033	GO:0035088	GO:0004713	GO:0034331	GO:0003006	GO:0008283	GO:0044424	GO:0032559	GO:0006464
	Unigene91531	8	GO:0034502	GO:0035264	GO:0016763	GO:0012505	GO:0006464	GO:0042598	GO:0043231	GO:0005813
	Unigene91538	18	GO:0006909	GO:0048812	GO:0015630	GO:0010259	GO:0030036	GO:0045927	GO:0004674	GO:0023060	GO:0032559	GO:0030537	GO:0007292	GO:0006464	GO:0033554	GO:0016049	GO:0035264	GO:0030529	GO:0044248	GO:0031667
	Unigene91775	8	GO:0006357	GO:0031981	GO:0046872	GO:0048610	GO:0001071	GO:0003677	GO:0004879	GO:0048232
	Unigene91839	17	GO:0033036	GO:0032991	GO:0048729	GO:0043231	GO:0070161	GO:0007315	GO:0015629	GO:0015630	GO:0016056	GO:0009855	GO:0007635	GO:0008092	GO:0030036	GO:0035088	GO:0044091	GO:0042051	GO:0044444
	Unigene91847	7	GO:0003676	GO:0019058	GO:0043231	GO:0044444	GO:0051707	GO:0006310	GO:0050789
	Unigene91885	6	GO:0043234	GO:0005488	GO:0019941	GO:0007140	GO:0048232	GO:0019787
	Unigene91919	11	GO:0000166	GO:0044237	GO:0004672	GO:0008283	GO:0010627	GO:0044424	GO:0071842	GO:0007308	GO:0022402	GO:0009790	GO:0044238
	Unigene91931	7	GO:0005488	GO:0005681	GO:0000377	GO:0045069	GO:0006397	GO:0034518	GO:0016246
	Unigene91950	14	GO:0007411	GO:0033334	GO:0009888	GO:0035115	GO:0001558	GO:0008375	GO:0035468	GO:0015020	GO:0005789	GO:0001503	GO:0031224	GO:0042802	GO:0030166	GO:0001704
	Unigene91965	9	GO:0043231	GO:0044238	GO:0030695	GO:0044260	GO:0046872	GO:0019866	GO:0016874	GO:0048232	GO:0015031
	Unigene92019	49	GO:0007179	GO:0048704	GO:0001704	GO:0007346	GO:0010557	GO:0030282	GO:0032611	GO:0043234	GO:0002682	GO:0014706	GO:0022402	GO:0016049	GO:0019866	GO:0001071	GO:0019900	GO:0032906	GO:0001837	GO:0016477	GO:0045596	GO:0043231	GO:0043280	GO:0043566	GO:0012502	GO:0005126	GO:0001649	GO:0042127	GO:0042307	GO:0035270	GO:0010551	GO:0019048	GO:0050921	GO:0016564	GO:0042802	GO:0009952	GO:0010692	GO:0003704	GO:0000122	GO:0008637	GO:0032233	GO:0003143	GO:0034330	GO:0043565	GO:0032907	GO:0046649	GO:0006950	GO:0046332	GO:0048332
	Unigene92030	3	GO:0016023	GO:0016787	GO:0007338
	Unigene92059	3	GO:0007297	GO:0030036	GO:0015630
	Unigene92094	9	GO:0009948	GO:0065001	GO:0006310	GO:0006281	GO:0051276	GO:0007292	GO:0022403	GO:0003006	GO:0003824
	Unigene9280	11	GO:0032989	GO:0008360	GO:0005515	GO:0007424	GO:0003006	GO:0006355	GO:0007610	GO:0048754	GO:0043229	GO:0042051	GO:0016564
	Unigene93619	5	GO:0006289	GO:0005488	GO:0031981	GO:0044265	GO:0048232
	Unigene93630	11	GO:0008092	GO:0007293	GO:0007015	GO:0035171	GO:0010259	GO:0043063	GO:0033036	GO:0035324	GO:0004721	GO:0008306	GO:0030246
	Unigene93644	7	GO:0001654	GO:0043231	GO:0007243	GO:0007176	GO:0007297	GO:0005102	GO:0007389
	Unigene93693	26	GO:0006906	GO:0051049	GO:0033267	GO:0007017	GO:0001709	GO:0007292	GO:0031967	GO:0044087	GO:0012505	GO:0032155	GO:0032561	GO:0000149	GO:0042051	GO:0005798	GO:0017111	GO:0006886	GO:0010008	GO:0001700	GO:0005815	GO:0007281	GO:0035556	GO:0030036	GO:0032506	GO:0048168	GO:0033206	GO:0006959
	Unigene93695	8	GO:0005488	GO:0005622	GO:0010468	GO:0002164	GO:0007476	GO:0006897	GO:0048806	GO:0009790
	Unigene93715	7	GO:0048870	GO:0070325	GO:0006950	GO:0044464	GO:0030518	GO:0048232
	Unigene93729	17	GO:0048741	GO:0048638	GO:0016020	GO:0007612	GO:0016337	GO:0007173	GO:0044424	GO:0035151	GO:0048667	GO:0007420	GO:0048592	GO:0008037	GO:0048805	GO:0042995	GO:0043062	GO:0005488	GO:0045202
	Unigene93782	22	GO:0030427	GO:0032561	GO:0006909	GO:0033674	GO:0043005	GO:0009611	GO:0017111	GO:0007178	GO:0048812	GO:0008154	GO:0043231	GO:0070161	GO:0003006	GO:0010769	GO:0007391	GO:0048667	GO:0051235	GO:0006935	GO:0007292	GO:0030010	GO:0016477	GO:0000165
	Unigene93786	4	GO:0006259	GO:0005488	GO:0016049	GO:0031981
	Unigene93820	7	GO:0007293	GO:0007015	GO:0035171	GO:0010259	GO:0043063	GO:0033036	GO:0035324	GO:0008306
	Unigene93827	8	GO:0008092	GO:0030032	GO:0043234	GO:0007297	GO:0031252	GO:0030835	GO:0007444	GO:0015629	GO:0007300
	Unigene93843	22	GO:0043005	GO:0000737	GO:0007626	GO:0007417	GO:0005626	GO:0007612	GO:0016291	GO:0006665	GO:0007040	GO:0044297	GO:0000323	GO:0048468	GO:0044425	GO:0006464	GO:0030163	GO:0001505	GO:0045807	GO:0016049	GO:0044421	GO:0030136	GO:0010517	GO:0043066
	Unigene93985	6	GO:0009987	GO:0005515	GO:0008152	GO:0009653	GO:0008406	GO:0044424
	Unigene94056	7	GO:0043231	GO:0050789	GO:0016049	GO:0044267	GO:0006259	GO:0051319	GO:0005515
	Unigene94057	8	GO:0001745	GO:0046914	GO:0003676	GO:0061061	GO:0007399	GO:0043231	GO:0012501	GO:0060180
	Unigene94096	9	GO:0048731	GO:0005515	GO:0003006	GO:0005737	GO:0051179	GO:0032555	GO:0071842	GO:0044446	GO:0005634
	Unigene9411	3	GO:0003723	GO:0007010	GO:0007292
	Unigene9436	6	GO:0048029	GO:0016811	GO:0004175	GO:0005622	GO:0045762	GO:0007338
	Unigene9444	16	GO:0000278	GO:0007017	GO:0005515	GO:0043231	GO:0031647	GO:0001745	GO:0003006	GO:0015630	GO:0006587	GO:0016491	GO:0044267	GO:0008047	GO:0008306	GO:0030291	GO:0007264	GO:0045171
	Unigene9450	8	GO:0030528	GO:0005488	GO:0007472	GO:0007297	GO:0006355	GO:0060541	GO:0007010	GO:0007509
	Unigene9548	7	GO:0007276	GO:0007049	GO:0004175	GO:0046332	GO:0007178	GO:0070646	GO:0044424
	Unigene9576	7	GO:0009451	GO:0005488	GO:0002164	GO:0040009	GO:0016853	GO:0010467	GO:0044424
	Unigene96081	7	GO:0043231	GO:0007450	GO:0044444	GO:0007033	GO:0007281	GO:0016787	GO:0006914
	Unigene96084	10	GO:0043062	GO:0046872	GO:0048736	GO:0005496	GO:0043394	GO:0005539	GO:0031012	GO:0005198	GO:0043066	GO:0003416
	Unigene96139	6	GO:0048741	GO:0048638	GO:0017111	GO:0048284	GO:0005789	GO:0007019
	Unigene96153	6	GO:0009790	GO:0040009	GO:0046903	GO:0040011	GO:0002164	GO:0016741
	Unigene96234	27	GO:0019897	GO:0060560	GO:0007010	GO:0010557	GO:0001709	GO:0032989	GO:0046666	GO:0001708	GO:0003712	GO:0043231	GO:0010551	GO:0030182	GO:0003129	GO:0005913	GO:0001700	GO:0007560	GO:0035146	GO:0010004	GO:0065008	GO:0007166	GO:0007043	GO:0007293	GO:0007365	GO:0019899	GO:0019827	GO:0022408	GO:0014016
	Unigene96244	10	GO:0035091	GO:0043005	GO:0007269	GO:0016198	GO:0007019	GO:0015631	GO:0008582	GO:0044459	GO:0044444	GO:0045202
	Unigene96267	24	GO:0003007	GO:0000122	GO:0030528	GO:0010165	GO:0030278	GO:0042633	GO:0007417	GO:0043231	GO:0035115	GO:0043583	GO:0016575	GO:2000026	GO:0050954	GO:0019904	GO:0040008	GO:0008104	GO:0043234	GO:0030154	GO:0035112	GO:0007064	GO:0033554	GO:0035264	GO:0019899	GO:0048704
	Unigene96273	8	GO:0005488	GO:0048741	GO:0023060	GO:0045202	GO:0007010	GO:0048588	GO:0033267	GO:0016020
	Unigene96304	17	GO:0007043	GO:0048812	GO:0007444	GO:0016337	GO:0035150	GO:0007169	GO:0046872	GO:0007272	GO:0048667	GO:0007420	GO:0005918	GO:0021675	GO:0042995	GO:0048588	GO:0035006	GO:0043062	GO:0021782
	Unigene96309	11	GO:0007010	GO:0006810	GO:0048468	GO:0008092	GO:0050807	GO:0043232	GO:0007399	GO:0043062	GO:0005886	GO:0044444	GO:0007293
	Unigene9656	5	GO:0043231	GO:0001832	GO:0006915	GO:0034472	GO:0010466
	Unigene968	10	GO:0040007	GO:0001667	GO:0008406	GO:0007169	GO:0009887	GO:0060612	GO:0030154	GO:0045449	GO:0035270	GO:0043388
	Unigene97	4	GO:0043231	GO:0003006	GO:0007420	GO:0000087
	Unigene9717	10	GO:0008038	GO:0048675	GO:0043005	GO:0044297	GO:0007420	GO:0006935	GO:0042802	GO:0006897	GO:0043498	GO:0004888
	Unigene9748	12	GO:0019752	GO:0043231	GO:0051536	GO:0046914	GO:0002164	GO:0010259	GO:0016746	GO:0009060	GO:0035194	GO:0016836	GO:0048806	GO:0009790
	Unigene9750	6	GO:0008366	GO:0044249	GO:0016021	GO:0006681	GO:0048232	GO:0050694
	Unigene9798	22	GO:0000278	GO:0031981	GO:0032583	GO:0000122	GO:0042221	GO:0006476	GO:0043409	GO:0007051	GO:0016585	GO:0003712	GO:0044427	GO:0010830	GO:0003676	GO:0005819	GO:0051726	GO:0017136	GO:0048646	GO:0035264	GO:0019899	GO:0043066	GO:0006325	GO:0007623
	Unigene9848	10	GO:0004175	GO:0007338	GO:0051603	GO:0001669	GO:0046914	GO:0016811	GO:0045762	GO:0003676	GO:0048029	GO:0048610
	Unigene9893	13	GO:0031224	GO:0048580	GO:0044259	GO:0002164	GO:0035264	GO:0018996	GO:0008146	GO:0040009	GO:0040011	GO:0009653	GO:0044431	GO:0048806	GO:0006477
	Unigene9961	4	GO:0048610	GO:0019953	GO:0003006	GO:0016787
[truncated: 11 more columns]
